# Supplementary material for: Agronomic Characteristics Related to Grain Yield and Nutrient Use Efficiency for Wheat Production in China
Source: PLoS One. 2016 Sep 15;11(9):e0162802. doi: 10.1371/journal.pone.0162802 (PMC5025147; doi:10.1371/journal.pone.0162802)
Supplement: S1 Fig — (XLSX) [file pone.0162802.s001.xlsx]

## Sheet: Fig.1 A B C D
Year all data	Yield	N	P2O5	K2O
1999	5522.48	167.522	121.317	71.0738
2000	6338.92	175.295	113.009	73.6883
2001	5620.62	186.854	131.174	89.1019
2002	5149.95	159.912	108.736	98.9422
2003	5641.09	174.285	110.22	90.4563
2004	6275.41	192.339	120.519	115.107
2005	6453.03	189.827	107.621	102.497
2006	5664.45	188.43	100.631	103.334
2007	6012.68	171.02	87.5061	89.4745
2008	6785.32	179.872	93.3771	84.3999
2009	6333.98	143.658	87.5106	81.6885
2010	5819.01	159.078	79.1139	85.1392
Year OPT	OPT-Yield	OPT-N	OPT-P2O5	OPT-K2O
1999	7187.37	186.521	97.3286	103.629
2000	7436.93	180.625	141.729	124.292
2001	6612.92	180	148	161.333
2002	5419.91	160.996	136.981	121.698
2003	6594.88	209.292	139.023	127.849
2004	7372.17	193.488	134.634	136.244
2005	7499.45	198.581	123.733	126.917
2006	6723.92	217.107	117.51	151.189
2007	6710.75	207.068	111.803	137.779
2008	7629.8	216.949	107.201	107.617
2009	7180.13	188.395	105.806	106.175
2010	6517.03	212.528	93.314	111.837
Year FP	FP-Yield	FP-N	FP-P2O5	FP-K2O
1999	3746	160	146	10
2000	4453	150	135	22
2001	4269	189	121	19
2002	4518	167	134	24
2003	4617.8	183	125	19
2004	5506.78	148.333	148	40
2005	6872.17	230.2	127.333	75
2006	5801.7	252.52	124.4	45
2007	6515.49	233.821	90.7286	42.8429
2008	7310.58	221.422	81.5667	74.6307
2009	6405.08	229.518	100.064	61.8519
2010	5898.36	182.242	94.0909	58.9091
	FP	OPT
Yearbook
Year	Mean yield（kg/ha）
1999	3946.63
2000	3738.3
2001	3806.25
2002	3776.4
2003	3931.8
2004	4251.9
2005	4275.3
2006	4593.3
2007	4607.7
2008	4762.05
2009	4739.1
2010	4748.4
年份	OPT-PFP-N	OPT-PFP-P	OPT-PFP-K
1999	39.8921	85.8183	72.2631
2000	43.4999	68.8892	68.5553
2001	36.7384	46.3635	43.7254
2002	36.5727	43.7673	45.6368
2003	32.4442	49.772	55.6076
2004	42.6782	55.6779	72.983
2005	39.1677	63.2949	59.2328
2006	32.0522	59.8321	45.968
2007	33.0366	69.4635	53.5269
2008	35.6566	77.6015	78.6423
2009	39.925	73.9356	70.8725
2010	31.1107	76.6795	61.9078
Min	31.1107	43.7673	43.7254
Max	43.4999	85.8183	78.6423
年份 FP	个数	产量	个数	N肥偏生产力	个数	磷肥偏生产力	个数	钾肥偏生产力	个数	施N量	个数	施P2O5量	个数	施K2O量
1999
2000
2001
2002
2003	5	4617.8	5	25.1785	5	50.2986			5	183	5	91.6	5	0
2004	3	5506.78	3	37.0873	3	37.5179			3	148.333	3	148	3	0
2005	6	6872.17	6	30.2473	6	56.8343	4	69.1289	6	230.2	6	127.333	6	75
2006	10	5801.7	10	23.2868	10	49.1835	4	61.0933	10	252.52	10	124.4	10	45
2007	70	6515.49	70	31.4509	62	72.0748	37	90.8255	70	233.821	70	90.7286	70	42.8429
2008	45	7310.58	45	33.9883	45	106.461	41	94.961	45	221.422	45	81.5667	44	74.6307
2009	55	6405.08	55	30.9847	55	70.7564	37	78.023	55	229.518	55	100.064	54	61.8519
2010	33	5898.36	33	35.2362	33	67.1444	22	82.4805	33	182.242	33	94.0909	33	58.9091
年份 FP	FP-PFP-N	FP-PFP-P	FP-PFP-K
1999	19.8	36.9	90.3
2000	24.5	45.8	78.6
2001	21.3	39.6	64.5
2002	19.7	47.9	69.7
2003	25.1785	50.2986	58.4
2004	37.0873	37.5179	67.5
2005	30.2473	56.8343	69.1289
2006	23.2868	49.1835	61.0933
2007	31.4509	72.0748	90.8255
2008	33.9883	106.461	94.961
2009	30.9847	70.7564	78.023
2010	35.2362	67.1444	82.4805
Min	23.2868	37.5179	58.4
Max	37.0873	106.461	94.961
