# Supplementary material for: Agronomic Characteristics Related to Grain Yield and Nutrient Use Efficiency for Wheat Production in China
Source: PLoS One. 2016 Sep 15;11(9):e0162802. doi: 10.1371/journal.pone.0162802 (PMC5025147; doi:10.1371/journal.pone.0162802)
Supplement: S1 Table — (XLSX) [file pone.0162802.s009.xlsx]

## Sheet: Sheet1
No.	Data source	Treatments		NPK	PK	N-yield response	FCR-N		NPK	NK	P-yield response	FCR-P		NPK	NP	K-yield response	FCR-K
1	Hebei
23	裴雪霞，王秀斌，何萍，张秀芝，李科江，周卫，梁国庆，金继运	氮肥后移对壤氮素供应和冬小麦氮素吸收利用的影响
24		N0
25		N300/2
26		N210/2
27		N210/3		6429	5853	576	8.9594
28		N210/4
152	Henan
193	李丙奇，孙克刚，和爱玲，张欣	潮土区氮肥运筹对小麦产量和氮肥利用率的影响
194		T1
195		T2
196		T3
197		T4		7978	5396	2582	32.364
198		T5
199		T6
200		T7		8070	5396	2674	33.1351
201	王桂良,黄玉芳,叶优良	不同钾肥品种和用量对小麦产量品质和养分吸收利用的影响
202	钾肥品种试验	0
203		俄罗斯产 KCl												6331.9	5578.5	753.4	11.8985
204		罗布泊产 K2SO4												6489.1	5578.5	910.6	14.0328
205		开封产 K2SO4												6163.6	5578.5	585.1	9.49283
206		俄罗斯产 K2SO4												5969.8	5578.5	391.3	6.55466
207		罗布泊产K2SO4
208		罗布泊产												7006.8	5578.5	1428.3	20.3845
209		罗布泊产K2SO4												6590.1	5578.5	1011.6	15.3503
210		罗布泊产 K2SO4												6302.6	5578.5	724.1	11.4889
211	王桂良 叶优良	超高产小麦干物质累积、氮素营养及诊断研究
212	温县	N0
213		N90
214		N180
215		N270		9523	8523.4	999.6	10.4967
216		N360
217	兰考	N0
218		N90
219		N180
220		N270		9866.7	8946.7	920	9.32429
221		N360
222	温县	N0
223		N90
224		N180		9258.4	8671.7	586.7	6.33695
225		N270
226		N360
227	兰考	N0
228		N90
229		N180		9831.7	8940	891.7	9.06964
230		N270
231		N360
277	苗玉红 谭金芳	两个超高产小麦品种钾素营养差异性研究
278	温麦6号	钾水平0/mu
279		5												8768.51	7963.26	805.245	9.18338
280		10												8987.91	7963.26	1024.65	11.4003
281		15												9287.25	7963.26	1323.99	14.256
282		20												9046.95	7963.26	1083.69	11.9785
283	兰考906-4	钾水平0
284		5												7234.5	6619.5	615	8.50093
285		10												7615.5	6619.5	996	13.0786
286		15												8074.57	6619.5	1455.07	18.0205
287		20												7692.18	6619.5	1072.68	13.9451
294	逯怀森,董根中,肖伟强,卢浩坡,宁金星,尚巧平	施钾对旱地小麦养分变化的影响
295		基施75												5536.5	5119.5	417	7.53183
296		基施150												5689.5	5119.5	570	10.0185
297		苗期75												5614.5	5119.5	495	8.81646
298		拔节期75												5332.5	5119.5	213	3.99437
299		孕穗期75												5661	5119.5	541.5	9.56545
300		CK
301	赵鹏 陈阜	豫北秸秆还田配施氮肥对冬小麦氮利用及土壤硝态氮的短期效应
302		N0
303		N90
304		N180
305		N270		7465	5746	1719	23.0275
306		N360
307		S+N0
308		S+N90
309		S+N180
310		S+N270		8290	5535	2755	33.2328
311		S+N360
351	郭天财,宋 晓,马冬云,冯 伟,王永华	施氮水平对2种穗型冬小麦品种产量及氮素吸收利用的影响
352		兰考矮早八
353
354				8602.9	6976.9	1626	18.9006
355
356
357		豫麦49-198
358
359				9415.9	7409.9	2006	21.3044
360
391	唐旭 马义兵	小麦-玉米轮作土壤磷素长期演变规律研究
392		郑州
393		1991-2005
394
395
396
397
398
399	Shanxi
400	李廷亮1，谢英荷	施肥和覆膜垄沟种植对旱地小麦产量及水氮利用的影响
401		旋地平作
402		旋地平作
403		旋地平作
404		旋地平作		2052.88	1599.34	453.54	22.0929
405		覆膜垄沟
406	裴雪霞,王姣爱,党建友,张定一	小麦氮素吸收利用的基因型差异研究
407	品种试验	晋麦31
408		晋麦47
409		晋麦54
410		晋麦60
411		晋麦65
412		晋麦71
413		晋麦72
414		临丰615
415		临优145
416		临汾138
417		临汾5064
418		临选2039
419		临选2098
420		济南17
421		陕225
422		小偃54
423		晋麦31		6185.78	5954.57	231.214	3.73783
424		晋麦47		7266.94	6236.71	1030.23	14.177
425		晋麦54		6885.26	6101.79	783.468	11.3789
426		晋麦60		6772.02	5624.22	1147.8	16.9492
427		晋麦65		6664.34	6470.29	194.046	2.91171
428		晋麦71		6547.28	4848.9	1698.38	25.9402
429		晋麦72		6186.42	5425.14	761.272	12.3055
430		临丰615		6346.59	5661.85	684.74	10.7891
431		临优145
432		临汾138		6409.48	6178.27	231.214	3.60737
433		临汾5064
434		临选2039		6520.06	5421.85	1098.21	16.8435
435		临选2098		6333.64	6099.54	234.104	3.6962
436		济南17		5970.52	5435.9	534.624	8.9544
437		陕225
438		小偃54		4885.66	4239.54	646.127	13.225
464	闫翠萍 裴雪霞 王姣爱杨峰曹勇张晶党建友	秸秆还田与施氮对冬小麦生长发育及水肥利用率的影响
465		S+N0(CK)
466		S+N5
467		S+N10
468		S+N15		8286.01	5632.83	2653.18	32.02
469		S+N20
470		N0(CK)
471		N5
472		N10
473		N15		7893.41	5295.03	2598.38	32.9184
474		N20
475	Shandong
476	石玉 2007年博士论文	不同类型小麦品质形成的生理机制及植株-土壤氮素循环研究
477		NPK
478		NPK
479		NPK
480		NPK
481		NPK
482		NPK
483		NPK
484		NPK
485		NPK
486		NPK
487		NPK
488		NPK
489		NPK
490		NPK
491		NPK
492	石玉 博士论文
493		N0
494		N180
495		N240		9601.08	8077.93	1523.15	15.8644
496		N360
497		N0
498		N180
499		N240		9756.35	8561.4	1194.95	12.2479
500		N360
501		N0
502		N180
503		N240		11311.9	9291.8	2020.08	17.858
504		N360
505		N0
506		N180
507		N240		8027.65	6670.6	1357.06	16.9048
508		N360
543	晁赢，李旭花	长期定位施肥对土壤肥力特征及养分吸收利用的影响
544	定位试验	CK
545		N1P1K1+M1		5360	1842	3518	65.6343
546		M2
547		N2P2K2
548		M3
549		N3P3K3
550	张法全 王小燕 于振文 王西芝 白洪立	公顷产10000 kg小麦氮素和干物质积累与分配特性
551	试验3	N0
552		N210
553		N240
554		N270		10647	8952.49	1694.53	15.9155
555		N300
556		N330
557	试验1	N0
558		N180
559		N240		10143.8	8953.78	1190.06	11.7318
560	试验2	N260		10911.5	8953.78	1957.67	17.9414
613	王旭清,王法宏,董玉红,任德昌,曹宏鑫
614	95(6)161	施肥
616		施肥
618	烟农19	施肥
620		施肥
686	Quanxiao Fang, Qiang Yu, Enli Wang, Yuhai Chen, Guoliang Zhang, Jing Wang ,Longhui Li	Plant Soil ,2006,284:335–350
687
688				6000	4800	1200	20
689
690
698	Shaanxi
730	王荣辉1,2,王朝辉1,李生秀	施磷量对旱地小麦氮磷钾和干物质积累及产量的影响
731		P0
732		P50							5195	4619	576	11.0876
733		P100							5616	4619	997	17.7528
734		P150							5451	4619	832	15.2633
735	何晓雁1郝明德1, 2*李慧成2蔡志风3	黄土高原旱地小麦施肥对产量及水肥利用效率的影响
736		CK
737		N
738		M
739		NP
740		NM
741		NPM
742	杨晓1，郝明德2*，李芳林1	黄土区长期施肥对小麦产量和养分吸收的影响
743		CK
744		P
745		N
746		NP
747		M
748		PM
749		NM
750		NPM
760	赵新春,王朝辉	半干旱黄土区不同施氮水平冬小麦产量形成与氮素利用
761		N0
762		N80
763		N160
764		N240		6110	2400	3710	60.7201
765	赵新春,王朝辉	小麦的氮效率及施氮对小麦氮磷钾吸收与转运的影响
766		N0
767		N80
768		N160
769		N240		5860	4190	1670	28.4983
770	段敏,同延安,魏样	不同施肥条件下冬小麦氮素吸收、转运及累积的研究
771		CK
772		FP
773		N150P150K75
774		N225P120K120
775		N270P150K150
776		N300P120K120
777	段敏，同延安	2010年硕士学位论文
778		CK
779		FP
780		NP
781		NK
782		PK
783		NPK		8218	5974	2244	27.3059		8218	7001	1217	14.809		8218	7433	785	9.5522
807	党廷辉,郝明德,郭胜利,蔡贵信	旱地小麦施氮和地膜栽培的氮素效应与淋溶
808		CK
809		N1
810		N2
811		N1F
812	常规栽培(行距20 cm)	W
813	膜际栽培(覆膜宽30 cm,膜间距60 cm,膜间种植4行,行距15cm)	WM1		4562.5	2774.8	1787.7	39.1825
814	膜下栽培(覆膜宽60 cm,膜间距30cm,膜上种植4行,行距15 cm)	WM2
815	少耕留高茬覆盖(休闲期免耕高留茬,并麦杆覆盖,行距20	WT
816	赵新春,王朝辉	半干旱黄土区不同施氮水平冬小麦产量形成与氮素利用
817		0
818		80
819		160
820		240		6110	2400	3710	60.7201
854	王旭刚1,郝明德2,李建民1,张春霞2	氮磷配施对旱地小麦产量和吸肥特性的影响。
855		1
856		2
857		3
858		4
859		5							3563.58	2891.1	672.486	18.871
860		6							3677.46	2891.1	786.358	21.3832
861		7
862		8							5468.79	2152.02	3316.76	60.649
863		9							5550.06	2152.02	3398.03	61.2252
864	孙春梅 李生秀	不同基因型冬小麦的水氮利用效率研究
865	施氮	西杂1号		5115	2373	2742	53.607
866		西农1376(父）		4683.1	3218.4	1464.7	31.2763
867		陕150		4592.7	1860.9	2731.8	59.4814
868		小僵6号		4613.7	1674.2	2939.5	63.7124
869		西农2611		3794.5	1828.8	1965.7	51.8039
870		西农1376(母）		5023.5	2643.7	2379.8	47.3733
871		陕160		4658.6	2604.8	2053.8	44.0862
872		阎麦8911		4431.8	2748.7	1683.1	37.9778
873		矮丰3号		5091.4	2750.3	2341.1	45.9815
874		陕229		4429.3	2578.8	1850.5	41.7786
875	不施氮	西杂1号
876		西农1376(父）
877		陕150
878		小僵6号
879		西农2611
880		西农1376(母）
881		陕160
882		阎麦8911
883		矮丰3号
884		陕229
885	翟军海 周建斌	不同水肥调控措施对小麦养分吸收的效应及其机理研究
886		CK
887	灌水40mm	I
888		N		5085	4834.9	250.1	4.91839
889		M
890		IN
891		IM
892		NM
893		INM
894	徐福利 李生秀	氮素施用技术与不同保墒耕作施肥对土壤水肥因子及小麦产量的影响
895	地块1 1A	秋季施氮0
896	1B	0
897	1C	0
898	1D	0
899	2A	50
900	2B	50
901	2C	50
902	2D	50
903	3A	100
904	3B	100
905	3C	100
906	3D	100
907	4A	150
908	4B	150
909	4C	150
910	4D	150
911	5A	200
912	5B	200
913	5C	200
914	5D	200
975	党廷辉,郝明德	黄土塬区不同水分条件下冬小麦氮肥效应与土壤氮素调节
976	1996-1998年平均	0
977		45
978		90
979		135
980		180
981	同延安赵营赵护兵 樊红柱	施氮量对冬小麦氮素吸收、转运及产量的影响
982
983
984				6771	5472	1299	19.1848
985
986	王 兵 王朝辉	氮肥用量和栽培模式对西北旱地冬小麦生长和养分利用的影响
987
988				5270	2269	3001	56.945
989
1007	唐旭 马义兵	小麦-玉米轮作土壤磷素长期演变规律研究
1008		杨陵
1009		1991-2005
1010
1011
1012
1013
1014
1015	Jiangsu
1016	通州十总小麦测土配方施肥示范简报
1017	刁锡华	PK
1018		NPK（配方）		7368	4518	2850	38.6808
1019		常规
1020	刁锡明	PK
1021		NPK（配方）		6609	3225	3384	51.2029
1022		常规
1023	喻凤生	PK
1024		NPK（配方）		5790	3180	2610	45.0777
1025		常规
1041	林忠成	太湖地区土壤-作物系统氮素利用的综合研究
1042	2008	N0
1043		N1
1044		N2
1045		N3		7464.08	3556.93	3907.15	52.346
1046		N4
1047		N5
1048	2009	N00
1049		N11
1050		N22
1051		N33
1052		N44
1053		N55
1054		N01
1055		N02
1056		N03
1057		N04
1058		N05
1094	朱秀英 周马康 崔春梅 孙晓荣	小麦精确施氮对产量和氮肥利用率的影响
1095		N 0
1096		N 1		7174.5	5523	1651.5	23.019
1097		N 2
1115	周正权 郭文善	氮肥运筹对扬麦10号产量品质及其氮肥利用率的影响
1116		基施氮量0
1117		0
1118		0
1119		0		5965.7	3371.7	2594	43.4819
1120		60
1121		60
1122		60
1123		60		7431.9	3371.7	4060.2	54.6321
1124		120
1125		120
1126		120		8425	3371.7	5053.3	59.9798
1127		120
1128		180
1129		180		7218.6	3371.7	3846.9	53.2915
1130		180
1131		180
1132	葛鑫 戴其根	淮北地区不同类型小麦氮肥施用技术的研究
1133	陕农229	0
1134		65.6
1135		131.3
1136		196.9
1137		262.5		7484.6	3410.7	4073.9	54.4304
1138		328.1
1139		393.8
1140	济南17	0
1141		65.6
1142		131.3
1143		196.9
1144		262.5		7353.9	3673.4	3680.5	50.0483
1145		328.1
1146		393.8
1147	陕农229	基追比10:0
1148		9:1
1149		8:2
1150		7:3
1151		6:4
1152		5:5		7484.6	3410.7	4073.9	54.4304
1153		4:6
1154		3:7
1155	济南17	基追比10:0
1156		9:1
1157		8:2
1158		7:3
1159		6:4
1160		5:5		7353.9	3673.4	3680.5	50.0483
1161		4:6
1162		3:7
1163	追氮时期	5(基):5(拔)
1164		5(基):2.5(拔):2.5(花)		7023.8	3673.4	3350.4	47.7007
1165		5(基):5(花)
1181	谢学俭 沈其荣	苏南稻麦轮作农田系统土壤中磷氮的流失
1182		P0
1183		P20
1184		P40							3330	2625	705	21.1712
1185		P80							3330	2625	705	21.1712
1186		P160							3330	2625	705	21.1712
1187	杨勇 郭文善	晚播小麦高产优质栽培机理与技术研究
1188	播期10.30密度180	3:3.5:3.5
1189	180	5:2.5:2.5
1190	180	7:1.5:1.5
1191	360	3:3.5:3.5
1192	360	5;2.5:2.5
1193	360	7:1.5:1.5
1194	播期11.19密度180	3:3.5:3.5
1195	180	5:2.5:2.5
1196	180	7:1.5:1.5
1197	360	3:3.5:3.5
1198	360	5;2.5:2.5
1199	360	7:1.5:1.5
1200		膜侧沟播
1201		覆膜穴播
1202		露地高密
1203		露地低密
1204	王小军 张洪程	不同土壤肥力配方施肥对淮南小麦产量、品质及肥料吸收利用率的影响
1205	高肥力田扬麦11	N0P0K0
1206		N0P2K2
1207		N1P2K2
1208		N2P0K2
1209		N2P1K2							7540.5	7403.7	136.8	1.8142
1210		N2P2K2		7927.35	5443.35	2484	31.3346		7927.35	7403.7	523.65	6.60561		7927.35	7369.65	557.7	7.03514
1211		N2P3K2
1212		N2P2K0
1213		N2P2K1												7699.65	7369.65	330	4.28591
1214		N2P2K3
1215		N3P2K2
1216		N1P1K2
1217		N1P2K1
1218		N2P1K1
1219		N1.5P2K2
1220		N2.5P2K2
1221	高肥力田扬麦15	N0P0K0
1222		N0P2K2
1223		N1P2K2
1224		N2P0K2
1225		N2P1K2							7665	7522.8	142.2	1.85519
1226		N2P2K2		8138.4	4250.1	3888.3	47.7772		8138.4	7522.8	615.6	7.56414		8138.4	7679.7	458.7	5.63624
1227		N2P3K2							7585.95	7522.8	63.15	0.83246
1228		N2P2K0
1229		N2P2K1												7983.6	7679.7	303.9	3.80655
1230		N2P2K3
1231		N3P2K2
1232		N1P1K2
1233		N1P2K1
1234		N2P1K1
1235		N1.5P2K2
1236		N2.5P2K2
1237	中肥力田扬麦11	N0P0K0
1238		N0P2K2
1239		N1P2K2
1240		N2P0K2
1241		N2P1K2							7069.35	6754.2	315.15	4.45798
1242		N2P2K2		7669.2	3217.35	4451.85	58.0484		7669.2	6754.2	915	11.9308		7669.2	6787.65	881.55	11.4947
1243		N2P3K2							6886.65	6754.2	132.45	1.92329
1244		N2P2K0
1245		N2P2K1												7391.85	6787.65	604.2	8.17387
1246		N2P2K3
1247		N3P2K2
1248		N1P1K2
1249		N1P2K1
1250		N2P1K1
1251		N1.5P2K2
1252		N2.5P2K2
1253	中肥力田扬麦15	N0P0K0
1254		N0P2K2
1255		N1P2K2
1256		N2P0K2
1257		N2P1K2							6744.9	6671.4	73.5	1.08971
1258		N2P2K2		6994.5	3642.15	3352.35	47.9284		6994.5	6671.4	323.1	4.61934		6994.5	6731.85	262.65	3.75509
1259		N2P3K2							6761.4	6671.4	90	1.33109
1260		N2P2K0
1261		N2P2K1												6869.85	6731.85	138	2.00878
1262		N2P2K3												6807.9	6731.85	76.05	1.11708
1263		N3P2K2
1264		N1P1K2
1265		N1P2K1
1266		N2P1K1
1267		N1.5P2K2
1268		N2.5P2K2
1269	低肥力扬麦11	N0P0K0
1270		N0P2K2
1271		N1P2K2
1272		N2P0K2
1273		N2P1K2							6024.6	5895.3	129.3	2.1462
1274		N2P2K2		6498.9	2879.7	3619.2	55.6894		6498.9	5895.3	603.6	9.28773
1275		N2P3K2							6587.25	5895.3	691.95	10.5044
1276		N2P2K0
1277		N2P2K1												6475.2	6453.3	21.9	0.338213
1278		N2P2K3												6579	6453.3	125.7	1.91062
1279		N3P2K2
1280		N1P1K2
1281		N1P2K1
1282		N2P1K1
1283		N1.5P2K2
1284		N2.5P2K2
1285	低肥力田扬麦15	N0P0K0
1286		N0P2K2
1287		N1P2K2
1288		N2P0K2
1289		N2P1K2							6368.7	5719.05	649.65	10.2007
1290		N2P2K2		6620.25	2743.95	3876.3	58.5522		6620.25	5719.05	901.2	13.6128		6620.25	6095.25	525	7.93021
1291		N2P3K2							6758.85	5719.05	1039.8	15.3843
1292		N2P2K0
1293		N2P2K1												6527.25	6095.25	432	6.61841
1294		N2P2K3												6705.3	6095.25	610.05	9.09803
1295		N3P2K2
1296		N1P1K2
1297		N1P2K1
1298		N2P1K1
1299		N1.5P2K2
1300		N2.5P2K2
1301	朱秀英 周马康 崔春梅 孙晓荣	小麦精确施氮对产量和氮肥利用率的影响
1302
1303				7174.5	5523	1651.5	23.019
1304
1420	黄严帅 张洪程	氮肥用量和运筹对不同类型专用小麦产量形成及氮素吸收利用的影响
1421	高邮地点 扬麦11	2001-2002
1422
1423
1424
1425				6117	3571.5	2545.5	41.6135
1426
1427
1428	扬州地点	2001-2002
1429
1430
1431
1432				6523.5	3549	2974.5	45.5967
1433
1434
1435	高邮 宁麦9号	2001-2002
1436
1437
1438
1439				6190.5	3489	2701.5	43.6394
1440
1441
1442	扬州地点	2001-2002
1443
1444
1445
1446				6735	3567	3168	47.0379
1447
1448
1449	高邮 扬麦11	基追比10:0
1450		9:1
1451		8:2
1452		7:3
1453		6:4		6283.5	3571.5	2712	43.1607
1454		5:5
1455		4:6
1456		3:7
1457	扬州地点	基追比10:0
1458		9:1
1459		8:2
1460		7:3
1461		6:4		6771	3549	3222	47.5853
1462		5:5
1463		4:6
1464		3:7
1465	高邮 宁麦9号	基追比10:0
1466		9:1
1467		8:2
1468		7:3
1469		6:4		6339	3489	2850	44.9598
1470		5:5
1471		4:6
1472		3:7
1473	扬州地点	基追比10:0
1474		9:1
1475		8:2
1476		7:3
1477		6:4		7042.5	3567	3475.5	49.3504
1478		5:5
1479		4:6
1480		3:7
1591
1644	Beijing
1645	巨晓棠,潘家荣,刘学军,等	高肥力土壤冬小麦生长季肥料氮的去向研究Ⅰ.冬小麦生长季肥料氮去向
1646		0
1647		120		6145	4680	1465	23.8405
1648		240
1649		360
1650	刘学军,赵紫娟,巨晓棠,张福锁	基施氮肥对冬小麦产量、氮肥利用率及氮平衡的影响
1651		N0
1652		N75		4433	4217	216	4.87255
1653		N112.5
1654		N150
1667	唐旭 马义兵	小麦-玉米轮作土壤磷素长期演变规律研究
1668		昌平
1669		1991-2005
1670
1671
1672
1673
1674
1675	Ningxia
1681	张爱平,刘汝亮,李友宏,杨世琦,杨淑静,杨正礼	施用磷肥对春小麦产量与吸氮特性及土体中硝态氮累积的影响
1682		P0
1683		P60							6209	5584	625	10.066
1684		P120							6215	5584	631	10.1529
1685		P180							6003	5584	419	6.97984
1700	Gansu
1712	沈新磊,黄思光,王 俊,凌 莉,李世清,李凤民	半干旱农田生态系统地膜覆盖模式和施氮对小麦产量和氮效率的效应
1713	1999底墒L	M0
1714	春小麦			2554	1922	632	24.7455
1715		M30
1716				2491.4	2067.7	423.7	17.0065
1717		M60
1718				2436.2	2272.1	164.1	6.7359
1719		Mw
1720				2750.1	2276.4	473.7	17.2248
1721	底墒H	M0
1722				2424.3	2194.1	230.2	9.49552
1723		M30
1724				3138.5	2221.1	917.4	29.2305
1725		M60
1726				3305.3	2858.1	447.2	13.5298
1727		Mw
1728				3123.1	2625.9	497.2	15.9201
1729	2000底墒L	M0
1730				1833.91	1100.24	733.67	40.0058
1731		M30
1732				1886.15	1076.8	809.35	42.9102
1733		M60
1734				1202.85	1109	93.85	7.8023
1735		Mw
1736
1737	底墒H	M0
1738
1739		M30
1740				1763.32	1430.04	333.28	18.9007
1741		M60
1742				1771.39	1461.45	309.94	17.497
1743		Mw
1744				2144.52	1448.03	696.49	32.4777
1745	覆膜	M0
1746				2120	1863	257	12.1226
1747		M75
1748				3497	2776	721	20.6177
1749		M150
1750				3088	2905	183	5.92617
1751		Mw
1752				3111	3079	32	1.02861
1753	李文学 张福锁	小麦/玉米/蚕豆间作系统中氮、磷吸收利用特点及其环境效应
1754	不施磷P0	N0
1755		N100
1756		N200
1757		N300
1758		N400
1759		N0
1760		N100
1761		N200
1762		N300
1763		N400
1764	施磷P75	N0
1765		N100
1766		N200
1767		N300
1768		N400
1769		N0
1770		N100
1771		N200
1772		N300
1773		N400
1806	重庆市
1812	熊明彪 宋光煜	长期施肥条件下紫色土-小麦系统中钾素利用的研究
1813		CK
1814		N
1815		NP
1816		NK
1817		M
1818		NPK							2431.4	1432.1	999.3	41.0998		2431.4	1489.5	941.9	38.739
1819		MNPK
1832	田秀英 石孝军	定位施肥对稻麦产量和紫色土肥力的影响研究
1833		CK
1834		N
1835		NP
1836		NK
1837		PK
1838		NPK							3109.83	1813.87	1295.95	41.6729		3109.83	2652.02	457.803	14.7212
1839		M1
1840		Ml+NPK
1841	稻油	M1+(NPK)cl
1842		M1+(NPK)H
1843		M2+NPK
1844
1889	Xinjiang
1890	唐旭 马义兵	小麦-玉米轮作土壤磷素长期演变规律研究
1891		乌鲁木齐
1892		1990-2004
1893
1894	每年施入的氮相等，由秸秆和农家肥量确定
1895
1896
1897
1898	Hunan
1899	唐旭 马义兵	小麦-玉米轮作土壤磷素长期演变规律研究
1900		祁阳
1901		1991-2005
1902
1903
1904
1905
1906
1	Shanxi	1997年小麦山西临汾市乔李镇南麻村石灰性褐土钾肥长期定位试验
5	Shanxi	1997年小麦山西临汾市乔李镇南麻村石灰性褐土钾肥长期定位试验
9	Shanxi	1997年小麦山西临汾市乔李镇南麻村石灰性褐土钾肥长期定位试验
13	Shanxi	1997年小麦山西临汾市乔李镇南麻村石灰性褐土钾肥长期定位试验												7087	5931	1156	16.3116
17	Shanxi	1993年小麦山西临汾市乔李镇南麻村石灰性褐土钾肥长期定位试验
21	Shanxi	1993年小麦山西临汾市乔李镇南麻村石灰性褐土钾肥长期定位试验												4955	4910	45	0.908174
25	Shanxi	1993年小麦山西临汾市乔李镇南麻村石灰性褐土钾肥长期定位试验
29	Shanxi	1993年小麦山西临汾市乔李镇南麻村石灰性褐土钾肥长期定位试验												5135	4910	225	4.38169
33	Shanxi	1994年小麦山西临汾市乔李镇南麻村石灰性褐土钾肥长期定位试验
37	Shanxi	1994年小麦山西临汾市乔李镇南麻村石灰性褐土钾肥长期定位试验												5676	5270	406	7.15292
41	Shanxi	1994年小麦山西临汾市乔李镇南麻村石灰性褐土钾肥长期定位试验
45	Shanxi	1994年小麦山西临汾市乔李镇南麻村石灰性褐土钾肥长期定位试验												5796	5270	526	9.07522
49	Shanxi	1995年小麦山西临汾市乔李镇南麻村石灰性褐土钾肥长期定位试验
53	Shanxi	1995年小麦山西临汾市乔李镇南麻村石灰性褐土钾肥长期定位试验												5405	5330	75	1.3876
57	Shanxi	1995年小麦山西临汾市乔李镇南麻村石灰性褐土钾肥长期定位试验
61	Shanxi	1995年小麦山西临汾市乔李镇南麻村石灰性褐土钾肥长期定位试验												6607	5330	1277	19.328
65	Shanxi	1996年小麦山西临汾市乔李镇南麻村石灰性褐土钾肥长期定位试验
69	Shanxi	1996年小麦山西临汾市乔李镇南麻村石灰性褐土钾肥长期定位试验												5646	4715	931	16.4896
73	Shanxi	1996年小麦山西临汾市乔李镇南麻村石灰性褐土钾肥长期定位试验
77	Shanxi	1996年小麦山西临汾市乔李镇南麻村石灰性褐土钾肥长期定位试验												6351	4715	1636	25.7597
81	Shanxi	1998年小麦山西临汾市乔李镇南麻村石灰性褐土钾肥长期定位试验
85	Shanxi	1998年小麦山西临汾市乔李镇南麻村石灰性褐土钾肥长期定位试验												5480	4880	600	10.9489
89	Shanxi	1998年小麦山西临汾市乔李镇南麻村石灰性褐土钾肥长期定位试验
97	Shanxi	1999年小麦山西临汾市乔李镇南麻村石灰性褐土钾肥长期定位试验
101	Shanxi	1999年小麦山西临汾市乔李镇南麻村石灰性褐土钾肥长期定位试验												4805	4099	706	14.693
105	Shanxi	1999年小麦山西临汾市乔李镇南麻村石灰性褐土钾肥长期定位试验
109	Shanxi	1999年小麦山西临汾市乔李镇南麻村石灰性褐土钾肥长期定位试验												5180	4099	1081	20.8687
128	Shanxi	2000年小麦山西临汾市乔李镇南麻村钾肥长期定位试验
132	Shanxi	2000年小麦山西临汾市乔李镇南麻村钾肥长期定位试验												6547	5255	1292	19.7342
136	Shanxi	2000年小麦山西临汾市乔李镇南麻村钾肥长期定位试验
140	Shanxi	2000年小麦山西临汾市乔李镇南麻村钾肥长期定位试验												6366	5255	1111	17.4521
144	Shanxi	2001年小麦山西临汾市乔李镇南麻村钾肥长期定位试验
148	Shanxi	2001年小麦山西临汾市乔李镇南麻村钾肥长期定位试验												4955	3754	1201	24.2381
152	Shanxi	2001年小麦山西临汾市乔李镇南麻村钾肥长期定位试验
156	Shanxi	2001年小麦山西临汾市乔李镇南麻村钾肥长期定位试验												4474	3754	720	16.093
	Shanxi
1	Shanxi	2004年小麦山西临汾市乔李镇南麻村养分缺素试验		5491	2699	2792	50.8468		5491	5119	372	6.77472		5491	5305	186	3.38736
5	Shanxi	2004年小麦山西临汾市乔李镇南麻村养分缺素试验
9	Shanxi	2004年小麦山西临汾市乔李镇南麻村养分缺素试验
13	Shanxi	2004年小麦山西临汾市乔李镇南麻村养分缺素试验
17	Shanxi	2004年小麦山西临汾市乔李镇南麻村养分缺素试验
21	Shanxi	2004年小麦山西临汾市乔李镇南麻村养分缺素试验
25	Shanxi	2005年小麦山西临汾市乔李南麻村养分缺素试验		7524	6598	926	12.3073		7524	6218	1306	17.3578
29	Shanxi	2005年小麦山西临汾市乔李南麻村养分缺素试验
33	Shanxi	2005年小麦山西临汾市乔李南麻村养分缺素试验
37	Shanxi	2005年小麦山西临汾市乔李南麻村养分缺素试验
41	Shanxi	2005年小麦山西临汾市乔李南麻村养分缺素试验
45	Shanxi	2005年小麦山西临汾市乔李南麻村养分缺素试验
49	Shanxi	2003年小麦山西临汾市乔李镇南麻村养分缺素试验		7444	5926	1518	20.3923		7444	5889	1555	20.8893		7444	6296	1148	15.4218
53	Shanxi	2003年小麦山西临汾市乔李镇南麻村养分缺素试验
57	Shanxi	2003年小麦山西临汾市乔李镇南麻村养分缺素试验
61	Shanxi	2003年小麦山西临汾市乔李镇南麻村养分缺素试验
65	Shanxi	2003年小麦山西临汾市乔李镇南麻村养分缺素试验
69	Shanxi	2003年小麦山西临汾市乔李镇南麻村养分缺素试验
73	Shanxi	2002年小麦山西临汾乔李镇南麻村钾肥长期定位试验
77	Shanxi	2002年小麦山西临汾乔李镇南麻村钾肥长期定位试验												4805	4354	451	9.38606
81	Shanxi	2002年小麦山西临汾乔李镇南麻村钾肥长期定位试验
85	Shanxi	2002年小麦山西临汾乔李镇南麻村钾肥长期定位试验												5556	4354	1202	21.6343
109	Shanxi	2004年小麦山西临汾市乔李镇南麻村石灰性褐土钾肥长期定位试验
113	Shanxi	2004年小麦山西临汾市乔李镇南麻村石灰性褐土钾肥长期定位试验												7380	6990	390	5.28455
117	Shanxi	2004年小麦山西临汾市乔李镇南麻村石灰性褐土钾肥长期定位试验
121	Shanxi	2004年小麦山西临汾市乔李镇南麻村石灰性褐土钾肥长期定位试验												7890	6990	900	11.4068
125	Shanxi	2003年小麦山西临汾乔李镇南麻村钾肥长期定位试验
129	Shanxi	2003年小麦山西临汾乔李镇南麻村钾肥长期定位试验												5910	5736	174	2.94416
133	Shanxi	2003年小麦山西临汾乔李镇南麻村钾肥长期定位试验
137	Shanxi	2003年小麦山西临汾乔李镇南麻村钾肥长期定位试验												6630	5736	894	13.4842
143	Shanxi	2003年小麦山西临汾市乔李镇南麻村磷钾肥肥效试验
147	Shanxi	2003年小麦山西临汾市乔李镇南麻村磷钾肥肥效试验												5160	4560	600	11.6279
151	Shanxi	2003年小麦山西临汾市乔李镇南麻村磷钾肥肥效试验												5490	4560	930	16.9399
155	Shanxi	2003年小麦山西临汾市乔李镇南麻村磷钾肥肥效试验												4980	4560	420	8.43373
159	Shanxi	2003年小麦山西临汾市乔李镇南麻村磷钾肥肥效试验
163	Shanxi	2003年小麦山西临汾市乔李镇南麻村磷钾肥肥效试验
167	Shanxi	2005年小麦山西临汾乔李镇南麻村钾肥长期定位试验
171	Shanxi	2005年小麦山西临汾乔李镇南麻村钾肥长期定位试验												5972	5485	487	8.15472
175	Shanxi	2005年小麦山西临汾乔李镇南麻村钾肥长期定位试验												6179	5485	694	11.2316
179	Shanxi	2005年小麦山西临汾乔李镇南麻村钾肥长期定位试验
195	Shanxi	2007年冬小麦不同品种钾肥（硫酸钾、氯化钾）对产量和品质的影响02
199	Shanxi	2007年冬小麦不同品种钾肥（硫酸钾、氯化钾）对产量和品质的影响02												6359	4860	1499	23.5729
203	Shanxi	2007年冬小麦不同品种钾肥（硫酸钾、氯化钾）对产量和品质的影响02												5384	4860	524	9.73254
207	Shanxi	2007年冬小麦不同品种钾肥（硫酸钾、氯化钾）对产量和品质的影响01
211	Shanxi	2007年冬小麦不同品种钾肥（硫酸钾、氯化钾）对产量和品质的影响01												5727	5631	96	1.67627
215	Shanxi	2007年冬小麦不同品种钾肥（硫酸钾、氯化钾）对产量和品质的影响01												5930	5631	299	5.04216
219	Shanxi	2007年冬小麦养分限制因子研究		6756	5870	886	13.1143		6756	6299	457	6.76436		6756	6683	73	1.08052
223	Shanxi	2007年冬小麦养分限制因子研究
227	Shanxi	2007年冬小麦养分限制因子研究
231	Shanxi	2007年冬小麦养分限制因子研究
239	Shanxi	2007年冬小麦养分限制因子研究
251	Shanxi	2007年冬小麦养分限制因子研究
255	Shanxi	2007年冬小麦－夏玉米轮作条件下养分限制因子研究（小麦）							8084	6356	1728	21.3756		8084	7392	692	8.56012
259	Shanxi	2007年冬小麦－夏玉米轮作条件下养分限制因子研究（小麦）
263	Shanxi	2007年冬小麦－夏玉米轮作条件下养分限制因子研究（小麦）
267	Shanxi	2007年冬小麦－夏玉米轮作条件下养分限制因子研究（小麦）
271	Shanxi	2007年冬小麦－夏玉米轮作条件下养分限制因子研究（小麦）
275	Shanxi	2007年冬小麦－夏玉米轮作条件下养分限制因子研究（小麦）
279	Shanxi	2007年冬小麦－夏玉米长期施用钾肥下钾素循环与调控（小麦）
283	Shanxi	2007年冬小麦－夏玉米长期施用钾肥下钾素循环与调控（小麦）												7735	7110	625	8.08016
287	Shanxi	2007年冬小麦－夏玉米长期施用钾肥下钾素循环与调控（小麦）
291	Shanxi	2007年冬小麦－夏玉米长期施用钾肥下钾素循环与调控（小麦）												7946	7110	836	10.521
295	Shanxi	2008年山西省冬小麦－夏玉米轮作条件下不同施氮肥方式对作物产量、品质及环境的影响01
296	Shanxi	2008年山西省冬小麦－夏玉米轮作条件下不同施氮肥方式对作物产量、品质及环境的影响01
297	Shanxi	2008年山西省冬小麦－夏玉米轮作条件下不同施氮肥方式对作物产量、品质及环境的影响01
298	Shanxi	2008年山西省冬小麦－夏玉米轮作条件下不同施氮肥方式对作物产量、品质及环境的影响01
299	Shanxi	2008年山西省冬小麦－夏玉米轮作条件下不同施氮肥方式对作物产量、品质及环境的影响01
300	Shanxi	2008年山西省冬小麦－夏玉米轮作条件下不同施氮肥方式对作物产量、品质及环境的影响01
301	Shanxi	2008年山西省冬小麦－夏玉米轮作条件下不同施氮肥方式对作物产量、品质及环境的影响01
302	Shanxi	2008年山西省冬小麦－夏玉米轮作条件下不同施氮肥方式对作物产量、品质及环境的影响01
303	Shanxi	2008年山西省冬小麦－夏玉米轮作条件下不同施氮肥方式对作物产量、品质及环境的影响01
304	Shanxi	2008年山西省冬小麦－夏玉米轮作条件下不同施氮肥方式对作物产量、品质及环境的影响01
305	Shanxi	2008年山西省冬小麦－夏玉米轮作条件下不同施氮肥方式对作物产量、品质及环境的影响01
306	Shanxi	2008年山西省冬小麦－夏玉米轮作条件下不同施氮肥方式对作物产量、品质及环境的影响01
307	Shanxi	2008年山西省冬小麦－夏玉米轮作条件下不同施氮肥方式对作物产量、品质及环境的影响01
308	Shanxi	2008年山西省冬小麦－夏玉米轮作条件下不同施氮肥方式对作物产量、品质及环境的影响01
309	Shanxi	2008年山西省冬小麦－夏玉米轮作条件下不同施氮肥方式对作物产量、品质及环境的影响01
310	Shanxi	2008年山西省冬小麦－夏玉米轮作条件下不同施氮肥方式对作物产量、品质及环境的影响01		9191.82	5822.7	3369.12	36.6535
311	Shanxi	2008年山西省冬小麦－夏玉米轮作条件下不同施氮肥方式对作物产量、品质及环境的影响01		9864.42	5822.7	4041.72	40.9727
312	Shanxi	2008年山西省冬小麦－夏玉米轮作条件下不同施氮肥方式对作物产量、品质及环境的影响01		9976.14	5822.7	4153.44	41.6337
313	Shanxi	2008年山西省冬小麦－夏玉米轮作条件下不同施氮肥方式对作物产量、品质及环境的影响01
314	Shanxi	2008年山西省冬小麦－夏玉米轮作条件下不同施氮肥方式对作物产量、品质及环境的影响01
315	Shanxi	2008年山西省冬小麦－夏玉米轮作条件下不同施氮肥方式对作物产量、品质及环境的影响01
316	Shanxi	2009年山西省冬小麦不同施氮量及氮肥分配方式对作物产量及环境的影响(试验1)
317	Shanxi	2009年山西省冬小麦不同施氮量及氮肥分配方式对作物产量及环境的影响(试验1)
318	Shanxi	2009年山西省冬小麦不同施氮量及氮肥分配方式对作物产量及环境的影响(试验1)
319	Shanxi	2009年山西省冬小麦不同施氮量及氮肥分配方式对作物产量及环境的影响(试验1)
320	Shanxi	2009年山西省冬小麦不同施氮量及氮肥分配方式对作物产量及环境的影响(试验1)
321	Shanxi	2009年山西省冬小麦不同施氮量及氮肥分配方式对作物产量及环境的影响(试验1)
322	Shanxi	2009年山西省冬小麦不同施氮量及氮肥分配方式对作物产量及环境的影响(试验1)
323	Shanxi	2009年山西省冬小麦不同施氮量及氮肥分配方式对作物产量及环境的影响(试验1)
324	Shanxi	2009年山西省冬小麦不同施氮量及氮肥分配方式对作物产量及环境的影响(试验1)
325	Shanxi	2009年山西省冬小麦不同施氮量及氮肥分配方式对作物产量及环境的影响(试验1)
326	Shanxi	2009年山西省冬小麦不同施氮量及氮肥分配方式对作物产量及环境的影响(试验1)
327	Shanxi	2009年山西省冬小麦不同施氮量及氮肥分配方式对作物产量及环境的影响(试验1)
328	Shanxi	2009年山西省冬小麦不同施氮量及氮肥分配方式对作物产量及环境的影响(试验1)
329	Shanxi	2009年山西省冬小麦不同施氮量及氮肥分配方式对作物产量及环境的影响(试验1)
330	Shanxi	2009年山西省冬小麦不同施氮量及氮肥分配方式对作物产量及环境的影响(试验1)
331	Shanxi	2009年山西省冬小麦不同施氮量及氮肥分配方式对作物产量及环境的影响(试验1)
332	Shanxi	2009年山西省冬小麦不同施氮量及氮肥分配方式对作物产量及环境的影响(试验1)
333	Shanxi	2009年山西省冬小麦不同施氮量及氮肥分配方式对作物产量及环境的影响(试验1)
334	Shanxi	2009年山西省冬小麦不同施氮量及氮肥分配方式对作物产量及环境的影响(试验1)
335	Shanxi	2009年山西省冬小麦不同施氮量及氮肥分配方式对作物产量及环境的影响(试验1)
336	Shanxi	2009年山西省冬小麦不同施氮量及氮肥分配方式对作物产量及环境的影响(试验1)
337	Shanxi	2009年山西省冬小麦不同施氮量及氮肥分配方式对作物产量及环境的影响(试验1)
338	Shanxi	2009年山西省冬小麦不同施氮量及氮肥分配方式对作物产量及环境的影响(试验1)
339	Shanxi	2009年山西省冬小麦不同施氮量及氮肥分配方式对作物产量及环境的影响(试验1)
340	Shanxi	2009年山西省冬小麦不同施氮量及氮肥分配方式对作物产量及环境的影响(试验1)
341	Shanxi	2009年山西省冬小麦不同施氮量及氮肥分配方式对作物产量及环境的影响(试验1)
342	Shanxi	2009年山西省冬小麦不同施氮量及氮肥分配方式对作物产量及环境的影响(试验1)
343	Shanxi	2009年山西省冬小麦不同施氮量及氮肥分配方式对作物产量及环境的影响(试验1)
344	Shanxi	2009年山西省冬小麦不同施氮量及氮肥分配方式对作物产量及环境的影响(试验1)		7400.88	5861.6	1539.28	20.7986
345	Shanxi	2009年山西省冬小麦不同施氮量及氮肥分配方式对作物产量及环境的影响(试验1)		8267.28	5861.6	2405.68	29.0988
346	Shanxi	2009年山西省冬小麦不同施氮量及氮肥分配方式对作物产量及环境的影响(试验1)		7866	5861.6	2004.4	25.4818
347	Shanxi	2009年山西省冬小麦不同施氮量及氮肥分配方式对作物产量及环境的影响(试验1)		7423.68	5861.6	1562.08	21.0419
348	Shanxi	2009年山西省冬小麦不同施氮量及氮肥分配方式对作物产量及环境的影响(试验1)
349	Shanxi	2009年山西省冬小麦不同施氮量及氮肥分配方式对作物产量及环境的影响(试验1)
350	Shanxi	2009年山西省冬小麦不同施氮量及氮肥分配方式对作物产量及环境的影响(试验1)
351	Shanxi	2009年山西省冬小麦不同施氮量及氮肥分配方式对作物产量及环境的影响(试验1)
352	Shanxi	2009年山西省冬小麦不同施氮量及氮肥分配方式对作物产量及环境的影响(试验1)
353	Shanxi	2009年山西省冬小麦不同施氮量及氮肥分配方式对作物产量及环境的影响(试验1)
354	Shanxi	2009年山西省冬小麦不同施氮量及氮肥分配方式对作物产量及环境的影响(试验1)
355	Shanxi	2009年山西省冬小麦不同施氮量及氮肥分配方式对作物产量及环境的影响(试验1)
356	Shanxi	2009年山西省冬小麦养分限制因子研究(试验3)		4786.86	4178.1	608.76	12.7173		4786.86	4493.88	292.98	6.1205		4786.86	4341.9	444.96	9.29545
357	Shanxi	2009年山西省冬小麦养分限制因子研究(试验3)		5474.28	4632.96	841.32	15.3686		5474.28	4468.8	1005.48	18.3673
358	Shanxi	2009年山西省冬小麦养分限制因子研究(试验3)		4631.82	3885.12	746.7	16.1211		4631.82	4005.96	625.86	13.5122		4631.82	4341.9	289.92	6.25931
359	Shanxi	2009年山西省冬小麦养分限制因子研究(试验3)
360	Shanxi	2009年山西省冬小麦养分限制因子研究(试验3)
361	Shanxi	2009年山西省冬小麦养分限制因子研究(试验3)
362	Shanxi	2009年山西省冬小麦养分限制因子研究(试验3)
363	Shanxi	2009年山西省冬小麦养分限制因子研究(试验3)
364	Shanxi	2009年山西省冬小麦养分限制因子研究(试验3)
365	Shanxi	2009年山西省冬小麦养分限制因子研究(试验3)
366	Shanxi	2009年山西省冬小麦养分限制因子研究(试验3)
367	Shanxi	2009年山西省冬小麦养分限制因子研究(试验3)
368	Shanxi	2009年山西省冬小麦养分限制因子研究(试验3)
369	Shanxi	2009年山西省冬小麦养分限制因子研究(试验3)
370	Shanxi	2009年山西省冬小麦养分限制因子研究(试验3)
371	Shanxi	2009年山西省冬小麦养分限制因子研究(试验3)
372	Shanxi	2009年山西省冬小麦养分限制因子研究(试验3)
373	Shanxi	2009年山西省冬小麦养分限制因子研究(试验3)
374	Shanxi	2009年山西省冬小麦养分限制因子研究(试验3)
375	Shanxi	2009年山西省冬小麦养分限制因子研究(试验3)
376	Shanxi	2009年山西省冬小麦养分限制因子研究(试验3)
377	Shanxi	2009年山西省冬小麦高效施肥技术集成研究(试验4)
381	Shanxi	2009年山西省冬小麦高效施肥技术集成研究(试验4)
385	Shanxi	2009年山西省冬小麦高效施肥技术集成研究(试验4)
389	Shanxi	2009年山西省冬小麦高效施肥技术集成研究(试验4)
393	Shanxi	2009年山西省冬小麦高效施肥技术集成研究(试验4)
397	Shanxi	2009年山西省冬小麦高效施肥技术集成研究(试验4)
401	Shanxi	2009年山西省冬小麦氮适宜用量研究(试验2)
402	Shanxi	2009年山西省冬小麦氮适宜用量研究(试验2)
403	Shanxi	2009年山西省冬小麦氮适宜用量研究(试验2)
404	Shanxi	2009年山西省冬小麦氮适宜用量研究(试验2)
405	Shanxi	2009年山西省冬小麦氮适宜用量研究(试验2)
406	Shanxi	2009年山西省冬小麦氮适宜用量研究(试验2)
407	Shanxi	2009年山西省冬小麦氮适宜用量研究(试验2)
408	Shanxi	2009年山西省冬小麦氮适宜用量研究(试验2)
413	Shanxi	2009年山西省冬小麦氮适宜用量研究(试验2)		7236.72	5932	1304.72	18.0292
414	Shanxi	2009年山西省冬小麦氮适宜用量研究(试验2)		7156.92	5932	1224.92	17.1152
415	Shanxi	2009年山西省冬小麦氮适宜用量研究(试验2)		6992.76	5932	1060.76	15.1694
416	Shanxi	2009年山西省冬小麦氮适宜用量研究(试验2)		8208	5932	2276	27.729
421	Shanxi	2009年山西省冬小麦磷适宜用量研究(试验2)
425	Shanxi	2009年山西省冬小麦磷适宜用量研究(试验2)
433	Shanxi	2009年山西省冬小麦磷适宜用量研究(试验2)							7236.72	5167.62	2069.1	28.5917
441	Shanxi	2009年山西省冬小麦钾适宜用量研究(试验2)
445	Shanxi	2009年山西省冬小麦钾适宜用量研究(试验2)
453	Shanxi	2009年山西省冬小麦钾适宜用量研究(试验2)												7236.72	5167.62	2069.1	28.5917
461	Shanxi	2009年山西省轮作条件下冬小麦养分耗竭后土壤恢复研究(试验6)		7052.04	5810.6	1241.44	17.604		7052.04	4747	2305.04	32.6861		7052.04	5722.2	1329.84	18.8575
462	Shanxi	2009年山西省轮作条件下冬小麦养分耗竭后土壤恢复研究(试验6)		6270	5810.6	459.4	7.32695		6270	4747	1523	24.2903		6270	5722.2	547.8	8.73684
465	Shanxi	2009年山西省轮作条件下冬小麦养分耗竭后土壤恢复研究(试验6)
466	Shanxi	2009年山西省轮作条件下冬小麦养分耗竭后土壤恢复研究(试验6)
469	Shanxi	2009年山西省轮作条件下冬小麦养分耗竭后土壤恢复研究(试验6)
470	Shanxi	2009年山西省轮作条件下冬小麦养分耗竭后土壤恢复研究(试验6)
473	Shanxi	2009年山西省轮作条件下冬小麦养分耗竭后土壤恢复研究(试验6)
474	Shanxi	2009年山西省轮作条件下冬小麦养分耗竭后土壤恢复研究(试验6)
477	Shanxi	2009年山西省轮作条件下冬小麦养分耗竭后土壤恢复研究(试验6)
478	Shanxi	2009年山西省轮作条件下冬小麦养分耗竭后土壤恢复研究(试验6)
481	Shanxi	2009年山西省轮作条件下冬小麦养分耗竭后土壤恢复研究(试验6)
482	Shanxi	2009年山西省轮作条件下冬小麦养分耗竭后土壤恢复研究(试验6)
485	Shanxi	2009年山西省在轮作条件下长期施用钾肥对冬小麦钾素循环与调控(试验5)
486	Shanxi	2009年山西省在轮作条件下长期施用钾肥对冬小麦钾素循环与调控(试验5)
489	Shanxi	2009年山西省在轮作条件下长期施用钾肥对冬小麦钾素循环与调控(试验5)												5506.2	5221.8	284.4	5.16509
490	Shanxi	2009年山西省在轮作条件下长期施用钾肥对冬小麦钾素循环与调控(试验5)
493	Shanxi	2009年山西省在轮作条件下长期施用钾肥对冬小麦钾素循环与调控(试验5)
494	Shanxi	2009年山西省在轮作条件下长期施用钾肥对冬小麦钾素循环与调控(试验5)
497	Shanxi	2009年山西省在轮作条件下长期施用钾肥对冬小麦钾素循环与调控(试验5)												5702.28	5221.8	480.48	8.4261
498	Shanxi	2009年山西省在轮作条件下长期施用钾肥对冬小麦钾素循环与调控(试验5)
501	Shanxi	2008年山西省冬小麦－夏玉米轮作条件下养分限制因子研究01							9234	7705.8	1528.2	16.5497		9234	8623.5	610.5	6.61144
502	Shanxi	2008年山西省冬小麦－夏玉米轮作条件下养分限制因子研究01							8926.2	7705.8	1220.4	13.6721		8926.2	8623.5	302.7	3.39114
505	Shanxi	2008年山西省冬小麦－夏玉米轮作条件下养分限制因子研究01
506	Shanxi	2008年山西省冬小麦－夏玉米轮作条件下养分限制因子研究01
509	Shanxi	2008年山西省冬小麦－夏玉米轮作条件下养分限制因子研究01
510	Shanxi	2008年山西省冬小麦－夏玉米轮作条件下养分限制因子研究01
513	Shanxi	2008年山西省冬小麦－夏玉米轮作条件下养分限制因子研究01
514	Shanxi	2008年山西省冬小麦－夏玉米轮作条件下养分限制因子研究01
517	Shanxi	2008年山西省冬小麦－夏玉米轮作条件下养分限制因子研究01
518	Shanxi	2008年山西省冬小麦－夏玉米轮作条件下养分限制因子研究01
521	Shanxi	2008年山西省冬小麦－夏玉米轮作条件下养分限制因子研究01
522	Shanxi	2008年山西省冬小麦－夏玉米轮作条件下养分限制因子研究01
523	Shanxi	2008年山西省冬小麦－夏玉米轮作条件下养分限制因子研究01
525	Shanxi	2004年山西省钾肥长期定位试验总结(试验1)
529	Shanxi	2004年山西省钾肥长期定位试验总结(试验1)												7387.8	6997.3	390.5	5.28574
533	Shanxi	2004年山西省钾肥长期定位试验总结(试验1)
537	Shanxi	2004年山西省钾肥长期定位试验总结(试验1)												7898.3	6997.3	901	11.4075
541	Shanxi	2008年山西省冬小麦－夏玉米长期施用钾肥下钾素循环与调控（小麦）
545	Shanxi	2008年山西省冬小麦－夏玉米长期施用钾肥下钾素循环与调控（小麦）												7962.9	7785.06	177.84	2.23336
549	Shanxi	2008年山西省冬小麦－夏玉米长期施用钾肥下钾素循环与调控（小麦）
553	Shanxi	2008年山西省冬小麦－夏玉米长期施用钾肥下钾素循环与调控（小麦）												8783.7	7785.06	998.64	11.3692
557	Shanxi	2006年山西省临汾市长期施用钾肥下冬小麦钾素循环与调控
558	Shanxi	2006年山西省临汾市长期施用钾肥下冬小麦钾素循环与调控
559	Shanxi	2006年山西省临汾市长期施用钾肥下冬小麦钾素循环与调控
560	Shanxi	2006年山西省临汾市长期施用钾肥下冬小麦钾素循环与调控
561	Shanxi	2006年山西省临汾市长期施用钾肥下冬小麦钾素循环与调控												7855.74	6983.9	871.84	11.0981
562	Shanxi	2006年山西省临汾市长期施用钾肥下冬小麦钾素循环与调控												7262.94	6983.9	279.04	3.84197
563	Shanxi	2006年山西省临汾市长期施用钾肥下冬小麦钾素循环与调控												7821.54	6983.9	837.64	10.7094
564	Shanxi	2006年山西省临汾市长期施用钾肥下冬小麦钾素循环与调控												7742.88	6983.9	758.98	9.8023
565	Shanxi	2006年山西省临汾市长期施用钾肥下冬小麦钾素循环与调控
566	Shanxi	2006年山西省临汾市长期施用钾肥下冬小麦钾素循环与调控
567	Shanxi	2006年山西省临汾市长期施用钾肥下冬小麦钾素循环与调控
568	Shanxi	2006年山西省临汾市长期施用钾肥下冬小麦钾素循环与调控
569	Shanxi	2006年山西省临汾市长期施用钾肥下冬小麦钾素循环与调控												7745.16	6983.9	761.26	9.82885
570	Shanxi	2006年山西省临汾市长期施用钾肥下冬小麦钾素循环与调控												8254.74	6983.9	1270.84	15.3953
571	Shanxi	2006年山西省临汾市长期施用钾肥下冬小麦钾素循环与调控												8955.84	6983.9	1971.94	22.0185
572	Shanxi	2006年山西省临汾市长期施用钾肥下冬小麦钾素循环与调控												8251.32	6983.9	1267.42	15.3602
573	Shanxi	2010年冬小麦-夏玉米轮作氮肥调控技术研究（小麦）
574	Shanxi	2010年冬小麦-夏玉米轮作氮肥调控技术研究（小麦）
575	Shanxi	2010年冬小麦-夏玉米轮作氮肥调控技术研究（小麦）
576	Shanxi	2010年冬小麦-夏玉米轮作氮肥调控技术研究（小麦）
577	Shanxi	2010年冬小麦-夏玉米轮作氮肥调控技术研究（小麦）
578	Shanxi	2010年冬小麦-夏玉米轮作氮肥调控技术研究（小麦）
579	Shanxi	2010年冬小麦-夏玉米轮作氮肥调控技术研究（小麦）
580	Shanxi	2010年冬小麦-夏玉米轮作氮肥调控技术研究（小麦）
581	Shanxi	2010年冬小麦-夏玉米轮作氮肥调控技术研究（小麦）		6478.62	5543.8	934.82	14.4293
582	Shanxi	2010年冬小麦-夏玉米轮作氮肥调控技术研究（小麦）		6634.8	5543.8	1091	16.4436
583	Shanxi	2010年冬小麦-夏玉米轮作氮肥调控技术研究（小麦）		6480.9	5543.8	937.1	14.4594
584	Shanxi	2010年冬小麦-夏玉米轮作氮肥调控技术研究（小麦）		6722.58	5543.8	1178.78	17.5346
585	Shanxi	2010年冬小麦-夏玉米轮作氮肥调控技术研究（小麦）
586	Shanxi	2010年冬小麦-夏玉米轮作氮肥调控技术研究（小麦）
587	Shanxi	2010年冬小麦-夏玉米轮作氮肥调控技术研究（小麦）
588	Shanxi	2010年冬小麦-夏玉米轮作氮肥调控技术研究（小麦）
589	Shanxi	2010年冬小麦-夏玉米轮作氮肥调控技术研究（小麦）
590	Shanxi	2010年冬小麦-夏玉米轮作氮肥调控技术研究（小麦）
591	Shanxi	2010年冬小麦-夏玉米轮作氮肥调控技术研究（小麦）
592	Shanxi	2010年冬小麦-夏玉米轮作氮肥调控技术研究（小麦）
593	Shanxi	2010年冬小麦-夏玉米轮作氮肥调控技术研究（小麦）
594	Shanxi	2010年冬小麦-夏玉米轮作氮肥调控技术研究（小麦）
595	Shanxi	2010年冬小麦-夏玉米轮作氮肥调控技术研究（小麦）
596	Shanxi	2010年冬小麦-夏玉米轮作氮肥调控技术研究（小麦）
597	Shanxi	2006年冬小麦/夏玉米轮作条件下冬小麦养分限制因子研究		8316.3	5578.02	2738.28	32.9267		8316.3	7529.7	786.6	9.45853		8316.3	7982.28	334.02	4.01645
601	Shanxi	2006年冬小麦/夏玉米轮作条件下冬小麦养分限制因子研究
605	Shanxi	2006年冬小麦/夏玉米轮作条件下冬小麦养分限制因子研究
609	Shanxi	2006年冬小麦/夏玉米轮作条件下冬小麦养分限制因子研究
613	Shanxi	2006年冬小麦/夏玉米轮作条件下冬小麦养分限制因子研究
617	Shanxi	2006年冬小麦/夏玉米轮作条件下冬小麦养分限制因子研究
440	Shandong	2006年山东省主要土类小麦施肥长期定位试验（棕壤）
443	Shandong	2006年山东省主要土类小麦施肥长期定位试验（棕壤）
446	Shandong	2006年山东省主要土类小麦施肥长期定位试验（棕壤）
449	Shandong	2006年山东省主要土类小麦施肥长期定位试验（棕壤）
452	Shandong	2006年山东省主要土类小麦施肥长期定位试验（棕壤）
455	Shandong	2006年山东省主要土类小麦施肥长期定位试验（棕壤）							5600.9	2167.2	3433.7	61.3062		5600.9	5122.8	478.1	8.53613
458	Shandong	2006年山东省主要土类小麦施肥长期定位试验（棕壤）
461	Shandong	2006年山东省主要土类小麦施肥长期定位试验（棕壤）		6962.5	2895	4067.5	58.4201
520	Shandong	2006年山东省小麦平衡施肥试验（海阳杜格庄村）
521	Shandong	2006年山东省小麦平衡施肥试验（海阳杜格庄村）
522	Shandong	2006年山东省小麦平衡施肥试验（海阳杜格庄村）
523	Shandong	2006年山东省小麦平衡施肥试验（海阳杜格庄村）												7075	6253	822	11.6184
524	Shandong	2006年山东省小麦平衡施肥试验（海阳杜格庄村）												7400	6253	1147	15.5
525	Shandong	2006年山东省小麦平衡施肥试验（海阳杜格庄村）												7060	6253	807	11.4306
526	Shandong	2006年山东省小麦平衡施肥试验（海阳杜格庄村）												7680	6253	1427	18.5807
527	Shandong	2006年山东省小麦平衡施肥试验（海阳杜格庄村）												7870	6253	1617	20.5464
528	Shandong	2006年山东省小麦平衡施肥试验（海阳杜格庄村）												7730	6253	1477	19.1074
529	Shandong	2006年山东省小麦平衡施肥试验（海阳杜格庄村）												7830	6253	1577	20.1405
530	Shandong	2006年山东省小麦平衡施肥试验（海阳杜格庄村）												7570	6253	1317	17.3976
531	Shandong	2006年山东省小麦平衡施肥试验（海阳杜格庄村）												7900	6253	1647	20.8481
532	Shandong	2006年山东省小麦平衡施肥示范（海阳杜格庄村）
533	Shandong	2006年山东省小麦平衡施肥示范（海阳杜格庄村）												7846.8	6645.6	1201.2	15.3082
534	Shandong	2006年山东省主要土类小麦施肥长期定位试验（褐土）
537	Shandong	2006年山东省主要土类小麦施肥长期定位试验（褐土）
540	Shandong	2006年山东省主要土类小麦施肥长期定位试验（褐土）
543	Shandong	2006年山东省主要土类小麦施肥长期定位试验（褐土）
546	Shandong	2006年山东省主要土类小麦施肥长期定位试验（褐土）
549	Shandong	2006年山东省主要土类小麦施肥长期定位试验（褐土）		4484.3	2674.5	1809.8	40.3586		4484.3	520.2	3964.1	88.3995		4484.3	2640.4	1843.9	41.119
552	Shandong	2006年山东省主要土类小麦施肥长期定位试验（褐土）
555	Shandong	2006年山东省主要土类小麦施肥长期定位试验（褐土）		5161.4	2674.5	2486.9	48.1827
561	Shandong	2007年山东省小麦养分限制因子试验（海阳市成家）
562	Shandong	2007年山东省小麦养分限制因子试验（海阳市成家）
563	Shandong	2007年山东省小麦养分限制因子试验（海阳市成家）
564	Shandong	2007年山东省小麦养分限制因子试验（海阳市成家）		6372	4292	2080	32.6428							6372	4979	1393	21.8613
565	Shandong	2007年山东省小麦养分限制因子试验（海阳市成家）		6214.5	4292	1922.5	30.9357							6214.5	4979	1235.5	19.8809
566	Shandong	2007年山东省小麦养分限制因子试验（海阳市成家）		6012	4292	1720	28.6094							6012	4979	1033	17.1823
567	Shandong	2007年山东省小麦养分限制因子试验（海阳市成家）
568	Shandong	2007年山东省小麦养分限制因子试验（海阳市成家）
569	Shandong	2007年山东省小麦养分限制因子试验（海阳市成家）
570	Shandong	2007年山东省小麦养分限制因子试验（海阳市成家）
571	Shandong	2007年山东省小麦养分限制因子试验（海阳市成家）
572	Shandong	2007年山东省小麦养分限制因子试验（海阳市成家）
573	Shandong	2007年山东省小麦养分限制因子试验（海阳市成家）
574	Shandong	2007年山东省小麦养分限制因子试验（海阳市成家）
575	Shandong	2007年山东省小麦养分限制因子试验（海阳市成家）
576	Shandong	2007年山东省小麦养分限制因子试验（海阳市成家）							5562	4381	1181	21.2334		5562	4381	1181	21.2334
577	Shandong	2007年山东省小麦养分限制因子试验（海阳市成家）							5850	4381	1469	25.1111		5850	4381	1469	25.1111
578	Shandong	2007年山东省小麦养分限制因子试验（海阳市成家）							6234	4381	1853	29.7241		6234	4381	1853	29.7241
579	Shandong	2007年山东省小麦养分限制因子试验（海阳市成家）
580	Shandong	2007年山东省小麦养分限制因子试验（海阳市成家）
581	Shandong	2007年山东省小麦养分限制因子试验（海阳市成家）
582	Shandong	2007年山东省小麦养分限制因子试验（海阳市成家）
583	Shandong	2007年山东省小麦养分限制因子试验（海阳市成家）
584	Shandong	2007年山东省小麦养分限制因子试验（海阳市成家）
585	Shandong	2007年山东省小麦养分限制因子试验（海阳市成家）
586	Shandong	2007年山东省小麦养分限制因子试验（海阳市成家）
587	Shandong	2007年山东省小麦养分限制因子试验（海阳市成家）
594	Shandong	2008年山东省冬小麦养分吸收规律研究（青州廉颇村）
600	Shandong	2008年山东省冬小麦养分吸收规律研究（青州廉颇村）
606	Shandong	2008年山东省冬小麦养分吸收规律研究（青州廉颇村）
614	Shandong	2008年山东省冬小麦养分吸收规律研究（青州廉颇村）
618	Shandong	2008年山东省冬小麦养分吸收规律研究（青州廉颇村）
626	Shandong	2008年山东省冬小麦养分吸收规律研究（青州廉颇村）
632	Shandong	2008年山东省冬小麦养分吸收规律研究（青州廉颇村）
638	Shandong	2008年山东省冬小麦养分吸收规律研究（青州廉颇村）
642	Shandong	2008年山东省钾肥不同基追比对小麦/玉米养分需求与供给的影响研究（小麦，青州廉颇村）
643	Shandong	2008年山东省钾肥不同基追比对小麦/玉米养分需求与供给的影响研究（小麦，青州廉颇村）
644	Shandong	2008年山东省钾肥不同基追比对小麦/玉米养分需求与供给的影响研究（小麦，青州廉颇村）
645	Shandong	2008年山东省钾肥不同基追比对小麦/玉米养分需求与供给的影响研究（小麦，青州廉颇村）												8760	7807	953	10.879
646	Shandong	2008年山东省钾肥不同基追比对小麦/玉米养分需求与供给的影响研究（小麦，青州廉颇村）												8580	7807	773	9.00932
647	Shandong	2008年山东省钾肥不同基追比对小麦/玉米养分需求与供给的影响研究（小麦，青州廉颇村）												8620	7807	813	9.43155
648	Shandong	2008年山东省钾肥不同基追比对小麦/玉米养分需求与供给的影响研究（小麦，青州廉颇村）												8200	7807	393	4.79268
649	Shandong	2008年山东省钾肥不同基追比对小麦/玉米养分需求与供给的影响研究（小麦，青州廉颇村）												8060	7807	253	3.13896
650	Shandong	2008年山东省钾肥不同基追比对小麦/玉米养分需求与供给的影响研究（小麦，青州廉颇村）												7840	7807	33	0.420918
651	Shandong	2008年山东省钾肥不同基追比对小麦/玉米养分需求与供给的影响研究（小麦，青州廉颇村）												8100	7807	293	3.61728
652	Shandong	2008年山东省钾肥不同基追比对小麦/玉米养分需求与供给的影响研究（小麦，青州廉颇村）												8060	7807	253	3.13896
653	Shandong	2008年山东省钾肥不同基追比对小麦/玉米养分需求与供给的影响研究（小麦，青州廉颇村）												8520	7807	713	8.36854
654	Shandong	2008年山东省氮肥不同基追比对小麦/玉米养分需求与供给的影响研究（小麦，青州廉颇村）
655	Shandong	2008年山东省氮肥不同基追比对小麦/玉米养分需求与供给的影响研究（小麦，青州廉颇村）
656	Shandong	2008年山东省氮肥不同基追比对小麦/玉米养分需求与供给的影响研究（小麦，青州廉颇村）
657	Shandong	2008年山东省氮肥不同基追比对小麦/玉米养分需求与供给的影响研究（小麦，青州廉颇村）
658	Shandong	2008年山东省氮肥不同基追比对小麦/玉米养分需求与供给的影响研究（小麦，青州廉颇村）
659	Shandong	2008年山东省氮肥不同基追比对小麦/玉米养分需求与供给的影响研究（小麦，青州廉颇村）
660	Shandong	2008年山东省氮肥不同基追比对小麦/玉米养分需求与供给的影响研究（小麦，青州廉颇村）
661	Shandong	2008年山东省氮肥不同基追比对小麦/玉米养分需求与供给的影响研究（小麦，青州廉颇村）
662	Shandong	2008年山东省氮肥不同基追比对小麦/玉米养分需求与供给的影响研究（小麦，青州廉颇村）
663	Shandong	2008年山东省氮肥不同基追比对小麦/玉米养分需求与供给的影响研究（小麦，青州廉颇村）		8195.04	6365	1830.04	22.3311
664	Shandong	2008年山东省氮肥不同基追比对小麦/玉米养分需求与供给的影响研究（小麦，青州廉颇村）		7972.78	6365	1607.78	20.1658
665	Shandong	2008年山东省氮肥不同基追比对小麦/玉米养分需求与供给的影响研究（小麦，青州廉颇村）		7614.39	6365	1249.39	16.4083
666	Shandong	2008年山东省氮肥不同基追比对小麦/玉米养分需求与供给的影响研究（小麦，青州廉颇村）
667	Shandong	2008年山东省氮肥不同基追比对小麦/玉米养分需求与供给的影响研究（小麦，青州廉颇村）
668	Shandong	2008年山东省氮肥不同基追比对小麦/玉米养分需求与供给的影响研究（小麦，青州廉颇村）
672	Shandong	2009年山东省小麦返青期和拔节期追肥SPAD阈值的确定试验研究（青州市廉颇村）
678	Shandong	2009年山东省小麦返青期和拔节期追肥SPAD阈值的确定试验研究（青州市廉颇村）
681	Shandong	2009年山东省小麦返青期和拔节期追肥SPAD阈值的确定试验研究（青州市廉颇村）
690	Shandong	2009年山东省小麦返青期和拔节期追肥SPAD阈值的确定试验研究（青州市廉颇村）
696	Shandong	2009年山东省小麦返青期和拔节期追肥SPAD阈值的确定试验研究（青州市廉颇村）
704	Shandong	2009年山东省小麦返青期和拔节期追肥SPAD阈值的确定试验研究（青州市廉颇村）
705	Shandong	2009年山东省小麦返青期和拔节期追肥SPAD阈值的确定试验研究（青州市廉颇村）
714	Shandong	2009年山东省小麦返青期和拔节期追肥SPAD阈值的确定试验研究（青州市廉颇村）
720	Shandong	2009年山东省小麦返青期和拔节期追肥SPAD阈值的确定试验研究（青州市廉颇村）
728	Shandong	2009年山东省小麦返青期和拔节期追肥SPAD阈值的确定试验研究（青州市廉颇村）
729	Shandong	2009年山东省小麦返青期和拔节期追肥SPAD阈值的确定试验研究（青州市廉颇村）
738	Shandong	2009年山东省小麦返青期和拔节期追肥SPAD阈值的确定试验研究（青州市廉颇村）
744	Shandong	2009年山东省小麦返青期和拔节期追肥SPAD阈值的确定试验研究（青州市廉颇村）
752	Shandong	2009年山东省小麦返青期和拔节期追肥SPAD阈值的确定试验研究（青州市廉颇村）
756	Shandong	2009年山东省小麦返青期和拔节期追肥SPAD阈值的确定试验研究（青州市廉颇村）
762	Shandong	2009年山东省小麦返青期和拔节期追肥SPAD阈值的确定试验研究（青州市廉颇村）
768	Shandong	2009年山东省小麦返青期和拔节期追肥SPAD阈值的确定试验研究（青州市廉颇村）		6689.4	5349	1340.4	20.0377
776	Shandong	2009年山东省小麦返青期和拔节期追肥SPAD阈值的确定试验研究（青州市廉颇村）		6584.6	5349	1235.6	18.765
780	Shandong	2009年山东省小麦返青期和拔节期追肥SPAD阈值的确定试验研究（青州市廉颇村）		6453.7	5349	1104.7	17.1173
786	Shandong	2009年山东省小麦返青期和拔节期追肥SPAD阈值的确定试验研究（青州市廉颇村）		6569.9	5349	1220.9	18.5832
792	Shandong	2009年山东省小麦返青期和拔节期追肥SPAD阈值的确定试验研究（青州市廉颇村）
800	Shandong	2009年山东省小麦返青期和拔节期追肥SPAD阈值的确定试验研究（青州市廉颇村）
804	Shandong	2009年山东省小麦返青期和拔节期追肥SPAD阈值的确定试验研究（青州市廉颇村）
812	Shandong	2009年山东省小麦返青期和拔节期追肥SPAD阈值的确定试验研究（青州市廉颇村）
817	Shandong	2009年山东省基于Nmin值的基肥用量与比例的确定小麦试验研究（青州市廉颇村）
821	Shandong	2009年山东省基于Nmin值的基肥用量与比例的确定小麦试验研究（青州市廉颇村）
828	Shandong	2009年山东省基于Nmin值的基肥用量与比例的确定小麦试验研究（青州市廉颇村）
831	Shandong	2009年山东省基于Nmin值的基肥用量与比例的确定小麦试验研究（青州市廉颇村）
841	Shandong	2009年山东省基于Nmin值的基肥用量与比例的确定小麦试验研究（青州市廉颇村）
845	Shandong	2009年山东省基于Nmin值的基肥用量与比例的确定小麦试验研究（青州市廉颇村）
853	Shandong	2009年山东省基于Nmin值的基肥用量与比例的确定小麦试验研究（青州市廉颇村）
855	Shandong	2009年山东省基于Nmin值的基肥用量与比例的确定小麦试验研究（青州市廉颇村）
865	Shandong	2009年山东省基于Nmin值的基肥用量与比例的确定小麦试验研究（青州市廉颇村）
869	Shandong	2009年山东省基于Nmin值的基肥用量与比例的确定小麦试验研究（青州市廉颇村）
877	Shandong	2009年山东省基于Nmin值的基肥用量与比例的确定小麦试验研究（青州市廉颇村）
881	Shandong	2009年山东省基于Nmin值的基肥用量与比例的确定小麦试验研究（青州市廉颇村）
890	Shandong	2009年山东省基于Nmin值的基肥用量与比例的确定小麦试验研究（青州市廉颇村）
893	Shandong	2009年山东省基于Nmin值的基肥用量与比例的确定小麦试验研究（青州市廉颇村）
901	Shandong	2009年山东省基于Nmin值的基肥用量与比例的确定小麦试验研究（青州市廉颇村）
905	Shandong	2009年山东省基于Nmin值的基肥用量与比例的确定小麦试验研究（青州市廉颇村）
909	Shandong	2009年山东省基于Nmin值的基肥用量与比例的确定小麦试验研究（青州市廉颇村）
918	Shandong	2009年山东省基于Nmin值的基肥用量与比例的确定小麦试验研究（青州市廉颇村）
925	Shandong	2009年山东省基于Nmin值的基肥用量与比例的确定小麦试验研究（青州市廉颇村）
929	Shandong	2009年山东省基于Nmin值的基肥用量与比例的确定小麦试验研究（青州市廉颇村）
933	Shandong	2009年山东省基于Nmin值的基肥用量与比例的确定小麦试验研究（青州市廉颇村）
942	Shandong	2009年山东省基于Nmin值的基肥用量与比例的确定小麦试验研究（青州市廉颇村）
950	Shandong	2009年山东省基于Nmin值的基肥用量与比例的确定小麦试验研究（青州市廉颇村）
953	Shandong	2009年山东省基于Nmin值的基肥用量与比例的确定小麦试验研究（青州市廉颇村）
957	Shandong	2009年山东省基于Nmin值的基肥用量与比例的确定小麦试验研究（青州市廉颇村）		6395.9	5090	1305.9	20.4178
966	Shandong	2009年山东省基于Nmin值的基肥用量与比例的确定小麦试验研究（青州市廉颇村）		6243.9	5090	1153.9	18.4804
969	Shandong	2009年山东省基于Nmin值的基肥用量与比例的确定小麦试验研究（青州市廉颇村）		6353.7	5090	1263.7	19.8892
978	Shandong	2009年山东省基于Nmin值的基肥用量与比例的确定小麦试验研究（青州市廉颇村）		6251.2	5090	1161.2	18.5756
981	Shandong	2008年山东省小麦-玉米养分限制因子定位试验研究（小麦，青州廉颇村）		8029.75	7493	536.752	6.68454		8029.75	7823	206.752	2.57483		8029.75	7638	391.752	4.87876
982	Shandong	2008年山东省小麦-玉米养分限制因子定位试验研究（小麦，青州廉颇村）		8181.82	7493	688.818	8.41889		8181.82	7823	358.818	4.38556		8181.82	7638	543.818	6.64667
983	Shandong	2008年山东省小麦-玉米养分限制因子定位试验研究（小麦，青州廉颇村）		7955.37	7493	462.372	5.81207		7955.37	7823	132.372	1.66393		7955.37	7638	317.372	3.9894
984	Shandong	2009年山东省基于土壤测试和目标产量的OPT小麦试验研究（青州市廉颇村）		6960.3	5660	1300.3	18.6817		6960.3	6789	171.3	2.4611		6960.3	6567	393.3	5.65062
985	Shandong	2009年山东省基于土壤测试和目标产量的OPT小麦试验研究（青州市廉颇村）		7005.2	5660	1345.2	19.2029		7005.2	6789	216.2	3.08628		7005.2	6567	438.2	6.25535
986	Shandong	2009年山东省基于土壤测试和目标产量的OPT小麦试验研究（青州市廉颇村）		6870.8	5660	1210.8	17.6224		6870.8	6789	81.8	1.19055		6870.8	6567	303.8	4.42161
987	Shandong	2009年山东省基于土壤测试和目标产量的OPT小麦试验研究（青州市廉颇村）
988	Shandong	2009年山东省基于土壤测试和目标产量的OPT小麦试验研究（青州市廉颇村）
989	Shandong	2009年山东省基于土壤测试和目标产量的OPT小麦试验研究（青州市廉颇村）
990	Shandong	2009年山东省基于土壤测试和目标产量的OPT小麦试验研究（青州市廉颇村）
991	Shandong	2009年山东省基于土壤测试和目标产量的OPT小麦试验研究（青州市廉颇村）
992	Shandong	2009年山东省基于土壤测试和目标产量的OPT小麦试验研究（青州市廉颇村）
993	Shandong	2009年山东省基于土壤测试和目标产量的OPT小麦试验研究（青州市廉颇村）
994	Shandong	2009年山东省基于土壤测试和目标产量的OPT小麦试验研究（青州市廉颇村）
995	Shandong	2009年山东省基于土壤测试和目标产量的OPT小麦试验研究（青州市廉颇村）
996	Shandong	2009年山东省基于土壤测试和目标产量的OPT小麦试验研究（青州市廉颇村）
997	Shandong	2009年山东省基于土壤测试和目标产量的OPT小麦试验研究（青州市廉颇村）
998	Shandong	2009年山东省基于土壤测试和目标产量的OPT小麦试验研究（青州市廉颇村）
999	Shandong	2009年山东省基于土壤测试和目标产量的OPT小麦试验研究（青州市廉颇村）
1000	Shandong	2009年山东省基于土壤测试和目标产量的OPT小麦试验研究（青州市廉颇村）
1001	Shandong	2009年山东省基于土壤测试和目标产量的OPT小麦试验研究（青州市廉颇村）
1002	Shandong	2009年山东省基于土壤测试和目标产量的OPT小麦试验研究（青州市廉颇村）
1003	Shandong	2009年山东省基于土壤测试和目标产量的OPT小麦试验研究（青州市廉颇村）
1004	Shandong	2009年山东省基于土壤测试和目标产量的OPT小麦试验研究（青州市廉颇村）
1011	Shandong	2008年山东省小麦-玉米养分限制因子定位试验研究（小麦，青州廉颇村）
1012	Shandong	2008年山东省小麦-玉米养分限制因子定位试验研究（小麦，青州廉颇村）
1013	Shandong	2008年山东省小麦-玉米养分限制因子定位试验研究（小麦，青州廉颇村）
1014	Shandong	2008年山东省小麦-玉米养分限制因子定位试验研究（小麦，青州廉颇村）
1015	Shandong	2008年山东省小麦-玉米养分限制因子定位试验研究（小麦，青州廉颇村）
1016	Shandong	2008年山东省小麦-玉米养分限制因子定位试验研究（小麦，青州廉颇村）
1017	Shandong	2008年山东省小麦-玉米养分限制因子定位试验研究（小麦，青州廉颇村）
1018	Shandong	2008年山东省小麦-玉米养分限制因子定位试验研究（小麦，青州廉颇村）
1019	Shandong	2008年山东省小麦-玉米养分限制因子定位试验研究（小麦，青州廉颇村）
1020	Shandong	2008年山东省小麦-玉米养分限制因子定位试验研究（小麦，青州廉颇村）
1021	Shandong	2008年山东省小麦-玉米养分限制因子定位试验研究（小麦，青州廉颇村）
1022	Shandong	2008年山东省小麦-玉米养分限制因子定位试验研究（小麦，青州廉颇村）
1023	Shandong	2008年山东省小麦-玉米养分限制因子定位试验研究（小麦，青州廉颇村）
1024	Shandong	2008年山东省小麦-玉米养分限制因子定位试验研究（小麦，青州廉颇村）
1025	Shandong	2008年山东省小麦-玉米养分限制因子定位试验研究（小麦，青州廉颇村）
1027	Shandong	2010年山东省基于Nmin值的基肥用量与比例的确定小麦试验研究（德州市平原县）
1032	Shandong	2010年山东省基于Nmin值的基肥用量与比例的确定小麦试验研究（德州市平原县）
1037	Shandong	2010年山东省基于Nmin值的基肥用量与比例的确定小麦试验研究（德州市平原县）
1043	Shandong	2010年山东省基于Nmin值的基肥用量与比例的确定小麦试验研究（德州市平原县）
1049	Shandong	2010年山东省基于Nmin值的基肥用量与比例的确定小麦试验研究（德州市平原县）
1054	Shandong	2010年山东省基于Nmin值的基肥用量与比例的确定小麦试验研究（德州市平原县）
1059	Shandong	2010年山东省基于Nmin值的基肥用量与比例的确定小麦试验研究（德州市平原县）
1064	Shandong	2010年山东省基于Nmin值的基肥用量与比例的确定小麦试验研究（德州市平原县）
1069	Shandong	2010年山东省基于Nmin值的基肥用量与比例的确定小麦试验研究（德州市平原县）
1075	Shandong	2010年山东省基于Nmin值的基肥用量与比例的确定小麦试验研究（德州市平原县）
1080	Shandong	2010年山东省基于Nmin值的基肥用量与比例的确定小麦试验研究（德州市平原县）
1081	Shandong	2010年山东省基于Nmin值的基肥用量与比例的确定小麦试验研究（德州市平原县）
1086	Shandong	2010年山东省基于Nmin值的基肥用量与比例的确定小麦试验研究（德州市平原县）
1091	Shandong	2010年山东省基于Nmin值的基肥用量与比例的确定小麦试验研究（德州市平原县）
1097	Shandong	2010年山东省基于Nmin值的基肥用量与比例的确定小麦试验研究（德州市平原县）
1102	Shandong	2010年山东省基于Nmin值的基肥用量与比例的确定小麦试验研究（德州市平原县）
1107	Shandong	2010年山东省基于Nmin值的基肥用量与比例的确定小麦试验研究（德州市平原县）
1112	Shandong	2010年山东省基于Nmin值的基肥用量与比例的确定小麦试验研究（德州市平原县）
1117	Shandong	2010年山东省基于Nmin值的基肥用量与比例的确定小麦试验研究（德州市平原县）		6500	4822	1678	25.8154
1123	Shandong	2010年山东省基于Nmin值的基肥用量与比例的确定小麦试验研究（德州市平原县）		6800	4822	1978	29.0882
1129	Shandong	2010年山东省基于Nmin值的基肥用量与比例的确定小麦试验研究（德州市平原县）		6300	4822	1478	23.4603
1135	Shandong	2010年山东省小麦返青期和拔节期追肥SPAD阈值的确定试验研究（青州市廉颇村）
1140	Shandong	2010年山东省小麦返青期和拔节期追肥SPAD阈值的确定试验研究（青州市廉颇村）
1145	Shandong	2010年山东省小麦返青期和拔节期追肥SPAD阈值的确定试验研究（青州市廉颇村）
1150	Shandong	2010年山东省小麦返青期和拔节期追肥SPAD阈值的确定试验研究（青州市廉颇村）
1155	Shandong	2010年山东省小麦返青期和拔节期追肥SPAD阈值的确定试验研究（青州市廉颇村）
1160	Shandong	2010年山东省小麦返青期和拔节期追肥SPAD阈值的确定试验研究（青州市廉颇村）
1161	Shandong	2010年山东省小麦返青期和拔节期追肥SPAD阈值的确定试验研究（青州市廉颇村）
1166	Shandong	2010年山东省小麦返青期和拔节期追肥SPAD阈值的确定试验研究（青州市廉颇村）
1171	Shandong	2010年山东省小麦返青期和拔节期追肥SPAD阈值的确定试验研究（青州市廉颇村）
1177	Shandong	2010年山东省小麦返青期和拔节期追肥SPAD阈值的确定试验研究（青州市廉颇村）
1182	Shandong	2010年山东省小麦返青期和拔节期追肥SPAD阈值的确定试验研究（青州市廉颇村）
1188	Shandong	2010年山东省小麦返青期和拔节期追肥SPAD阈值的确定试验研究（青州市廉颇村）
1193	Shandong	2010年山东省小麦返青期和拔节期追肥SPAD阈值的确定试验研究（青州市廉颇村）		6900	5144	1756	25.4493
1199	Shandong	2010年山东省小麦返青期和拔节期追肥SPAD阈值的确定试验研究（青州市廉颇村）		6733.3	5144	1589.3	23.6036
1204	Shandong	2010年山东省小麦返青期和拔节期追肥SPAD阈值的确定试验研究（青州市廉颇村）		7100	5144	1956	27.5493
1210	Shandong	2010年山东省小麦返青期和拔节期追肥SPAD阈值的确定试验研究（青州市廉颇村）
1215	Shandong	2010年山东省小麦返青期和拔节期追肥SPAD阈值的确定试验研究（青州市廉颇村）
1220	Shandong	2010年山东省小麦返青期和拔节期追肥SPAD阈值的确定试验研究（青州市廉颇村）
1221	Shandong	2010年山东省基于土壤测试和目标产量的OPT小麦试验研究（青州市廉颇村）		7233.33	5200	2033.33	28.1106		7233.33	5733	1500.33	20.7419		7233.33	5800	1433.33	19.8157
1222	Shandong	2010年山东省基于土壤测试和目标产量的OPT小麦试验研究（青州市廉颇村）		6300	5200	1100	17.4603		6300	5733	567	9		6300	5800	500	7.93651
1223	Shandong	2010年山东省基于土壤测试和目标产量的OPT小麦试验研究（青州市廉颇村）		6566.67	5200	1366.67	20.8122		6566.67	5733	833.667	12.6954		6566.67	5800	766.667	11.6751
1224	Shandong	2010年山东省基于土壤测试和目标产量的OPT小麦试验研究（青州市廉颇村）
1225	Shandong	2010年山东省基于土壤测试和目标产量的OPT小麦试验研究（青州市廉颇村）
1226	Shandong	2010年山东省基于土壤测试和目标产量的OPT小麦试验研究（青州市廉颇村）
1227	Shandong	2010年山东省基于土壤测试和目标产量的OPT小麦试验研究（青州市廉颇村）
1228	Shandong	2010年山东省基于土壤测试和目标产量的OPT小麦试验研究（青州市廉颇村）
1229	Shandong	2010年山东省基于土壤测试和目标产量的OPT小麦试验研究（青州市廉颇村）
1230	Shandong	2010年山东省基于土壤测试和目标产量的OPT小麦试验研究（青州市廉颇村）
1231	Shandong	2010年山东省基于土壤测试和目标产量的OPT小麦试验研究（青州市廉颇村）
1232	Shandong	2010年山东省基于土壤测试和目标产量的OPT小麦试验研究（青州市廉颇村）
1233	Shandong	2010年山东省基于土壤测试和目标产量的OPT小麦试验研究（青州市廉颇村）
1234	Shandong	2010年山东省基于土壤测试和目标产量的OPT小麦试验研究（青州市廉颇村）
1235	Shandong	2010年山东省基于土壤测试和目标产量的OPT小麦试验研究（青州市廉颇村）
1236	Shandong	2010年山东省基于土壤测试和目标产量的OPT小麦试验研究（青州市廉颇村）
1237	Shandong	2010年山东省基于土壤测试和目标产量的OPT小麦试验研究（青州市廉颇村）
1238	Shandong	2010年山东省基于土壤测试和目标产量的OPT小麦试验研究（青州市廉颇村）
1239	Shandong	2010年山东省基于土壤测试和目标产量的OPT小麦试验研究（青州市廉颇村）
1240	Shandong	2010年山东省基于土壤测试和目标产量的OPT小麦试验研究（青州市廉颇村）
1241	Shandong	2010年山东省基于土壤测试和目标产量的OPT小麦试验研究（青州市廉颇村）
337	Henan	2008-2009河南新坡小麦OPT试验		7438	5456	1982	26.6469		7438	6249	1189	15.9855		7438	6643.7	794.3	10.6789
338	Henan	2008-2009河南新坡小麦OPT试验		7659	5456	2203	28.7635		7659	6249	1410	18.4097		7659	6643.7	1015.3	13.2563
339	Henan	2008-2009河南新坡小麦OPT试验		7803	5456	2347	30.0782		7803	6249	1554	19.9154		7803	6643.7	1159.3	14.8571
340	Henan	2008-2009河南新坡小麦OPT试验
341	Henan	2008-2009河南新坡小麦OPT试验
342	Henan	2008-2009河南新坡小麦OPT试验
343	Henan	2008-2009河南新坡小麦OPT试验
344	Henan	2008-2009河南新坡小麦OPT试验
345	Henan	2008-2009河南新坡小麦OPT试验
346	Henan	2008-2009河南新坡小麦OPT试验
347	Henan	2008-2009河南新坡小麦OPT试验
348	Henan	2008-2009河南新坡小麦OPT试验
349	Henan	2008-2009河南新坡小麦OPT试验
350	Henan	2008-2009河南新坡小麦OPT试验
351	Henan	2008-2009河南新坡小麦OPT试验
352	Henan	2008-2009河南新坡小麦OPT试验
353	Henan	2008-2009河南新坡小麦OPT试验
354	Henan	2008-2009河南新坡小麦OPT试验
355	Henan	2008-2009河南平陵小麦OPT试验		7664	5622	2042	26.6441		7664	6594.3	1069.7	13.9575		7664	6845.3	818.7	10.6824
356	Henan	2008-2009河南平陵小麦OPT试验		7891	5622	2269	28.7543		7891	6594.3	1296.7	16.4326		7891	6845.3	1045.7	13.2518
357	Henan	2008-2009河南平陵小麦OPT试验		8040	5622	2418	30.0746		8040	6594.3	1445.7	17.9813		8040	6845.3	1194.7	14.8595
358	Henan	2008-2009河南平陵小麦OPT试验
359	Henan	2008-2009河南平陵小麦OPT试验
360	Henan	2008-2009河南平陵小麦OPT试验
361	Henan	2008-2009河南平陵小麦OPT试验
362	Henan	2008-2009河南平陵小麦OPT试验
363	Henan	2008-2009河南平陵小麦OPT试验
364	Henan	2008-2009河南平陵小麦OPT试验
365	Henan	2008-2009河南平陵小麦OPT试验
366	Henan	2008-2009河南平陵小麦OPT试验
367	Henan	2008-2009河南平陵小麦OPT试验
368	Henan	2008-2009河南平陵小麦OPT试验
369	Henan	2008-2009河南平陵小麦OPT试验
370	Henan	2008-2009河南平陵小麦OPT试验
371	Henan	2008-2009河南平陵小麦OPT试验
372	Henan	2008-2009河南平陵小麦OPT试验
373	Henan	2008-2009河南朱寨小麦OPT试验		7552	5540	2012	26.6419		7552	6400	1152	15.2542		7552	6745.3	806.7	10.6819
374	Henan	2008-2009河南朱寨小麦OPT试验		7776	5540	2236	28.7551		7776	6400	1376	17.6955		7776	6745.3	1030.7	13.2549
375	Henan	2008-2009河南朱寨小麦OPT试验		7922	5540	2382	30.0682		7922	6400	1522	19.2123		7922	6745.3	1176.7	14.8536
376	Henan	2008-2009河南朱寨小麦OPT试验
377	Henan	2008-2009河南朱寨小麦OPT试验
378	Henan	2008-2009河南朱寨小麦OPT试验
379	Henan	2008-2009河南朱寨小麦OPT试验
380	Henan	2008-2009河南朱寨小麦OPT试验
381	Henan	2008-2009河南朱寨小麦OPT试验
382	Henan	2008-2009河南朱寨小麦OPT试验
383	Henan	2008-2009河南朱寨小麦OPT试验
384	Henan	2008-2009河南朱寨小麦OPT试验
385	Henan	2008-2009河南朱寨小麦OPT试验
386	Henan	2008-2009河南朱寨小麦OPT试验
387	Henan	2008-2009河南朱寨小麦OPT试验
388	Henan	2008-2009河南朱寨小麦OPT试验
389	Henan	2008-2009河南朱寨小麦OPT试验
390	Henan	2008-2009河南朱寨小麦OPT试验
391	Henan	2008-2009河南平陵小麦氮素用量试验
392	Henan	2008-2009河南平陵小麦氮素用量试验
393	Henan	2008-2009河南平陵小麦氮素用量试验
394	Henan	2008-2009河南平陵小麦氮素用量试验
395	Henan	2008-2009河南平陵小麦氮素用量试验
396	Henan	2008-2009河南平陵小麦氮素用量试验
397	Henan	2008-2009河南平陵小麦氮素用量试验
398	Henan	2008-2009河南平陵小麦氮素用量试验
399	Henan	2008-2009河南平陵小麦氮素用量试验
400	Henan	2008-2009河南平陵小麦氮素用量试验
401	Henan	2008-2009河南平陵小麦氮素用量试验
402	Henan	2008-2009河南平陵小麦氮素用量试验
403	Henan	2008-2009河南平陵小麦氮素用量试验		7511	6804	707	9.41286
404	Henan	2008-2009河南平陵小麦氮素用量试验		7609	6804	805	10.5796
405	Henan	2008-2009河南平陵小麦氮素用量试验		7689	6804	885	11.5099
406	Henan	2008-2009河南平陵小麦氮素用量试验
407	Henan	2008-2009河南平陵小麦氮素用量试验
408	Henan	2008-2009河南平陵小麦氮素用量试验
409	Henan	2008年河南省浚县冬小麦养分限制因子试验		7427.5	6432.5	995	13.3962		7427.5	6851.7	575.8	7.75227		7427.5	7059.2	368.3	4.9586
410	Henan	2008年河南省浚县冬小麦养分限制因子试验		7572.5	6432.5	1140	15.0545		7572.5	6851.7	720.8	9.51865		7572.5	7059.2	513.3	6.77847
411	Henan	2008年河南省浚县冬小麦养分限制因子试验		7402.5	6432.5	970	13.1037		7402.5	6851.7	550.8	7.44073		7402.5	7059.2	343.3	4.63762
412	Henan	2008年河南省浚县冬小麦养分限制因子试验
413	Henan	2008年河南省浚县冬小麦养分限制因子试验
414	Henan	2008年河南省浚县冬小麦养分限制因子试验
415	Henan	2008年河南省浚县冬小麦养分限制因子试验
416	Henan	2008年河南省浚县冬小麦养分限制因子试验
417	Henan	2008年河南省浚县冬小麦养分限制因子试验
418	Henan	2008年河南省浚县冬小麦养分限制因子试验
419	Henan	2008年河南省浚县冬小麦养分限制因子试验
420	Henan	2008年河南省浚县冬小麦养分限制因子试验
421	Henan	2008年河南省浚县冬小麦养分限制因子试验
422	Henan	2008年河南省浚县冬小麦养分限制因子试验
423	Henan	2008年河南省浚县冬小麦养分限制因子试验
424	Henan	2008年河南省浚县冬小麦养分限制因子试验
425	Henan	2008年河南省浚县冬小麦养分限制因子试验
426	Henan	2008年河南省浚县冬小麦养分限制因子试验
427	Henan	2008年河南省浚县冬小麦氮肥基追比试验		7840	6611.7	1228.3	15.6671
428	Henan	2008年河南省浚县冬小麦氮肥基追比试验		7485	6611.7	873.3	11.6673
429	Henan	2008年河南省浚县冬小麦氮肥基追比试验		7655	6611.7	1043.3	13.629
430	Henan	2008年河南省浚县冬小麦氮肥基追比试验
431	Henan	2008年河南省浚县冬小麦氮肥基追比试验
432	Henan	2008年河南省浚县冬小麦氮肥基追比试验
433	Henan	2008年河南省浚县冬小麦氮肥基追比试验
434	Henan	2008年河南省浚县冬小麦氮肥基追比试验
435	Henan	2008年河南省浚县冬小麦氮肥基追比试验
436	Henan	2008年河南省浚县冬小麦氮肥基追比试验
437	Henan	2008年河南省浚县冬小麦氮肥基追比试验
438	Henan	2008年河南省浚县冬小麦氮肥基追比试验
439	Henan	2008年河南省浚县冬小麦氮肥基追比试验
440	Henan	2008年河南省浚县冬小麦氮肥基追比试验
441	Henan	2008年河南省浚县冬小麦氮肥基追比试验
442	Henan	2008年河南省浚县冬小麦钾肥基追比试验
443	Henan	2008年河南省浚县冬小麦钾肥基追比试验
444	Henan	2008年河南省浚县冬小麦钾肥基追比试验
445	Henan	2008年河南省浚县冬小麦钾肥基追比试验												7327	6854.2	472.8	6.45285
446	Henan	2008年河南省浚县冬小麦钾肥基追比试验												7385.5	6854.2	531.3	7.19383
447	Henan	2008年河南省浚县冬小麦钾肥基追比试验												7402.5	6854.2	548.3	7.40696
448	Henan	2008年河南省浚县冬小麦钾肥基追比试验												7347.5	6854.2	493.3	6.71385
449	Henan	2008年河南省浚县冬小麦钾肥基追比试验												7382.5	6854.2	528.3	7.15611
450	Henan	2008年河南省浚县冬小麦钾肥基追比试验												7785	6854.2	930.8	11.9563
451	Henan	2008年河南省浚县冬小麦钾肥基追比试验												7125	6854.2	270.8	3.8007
452	Henan	2008年河南省浚县冬小麦钾肥基追比试验												7087.5	6854.2	233.3	3.29171
453	Henan	2008年河南省浚县冬小麦钾肥基追比试验												7065	6854.2	210.8	2.98372
454	Henan	2008年河南省浚县冬小麦需肥规律试验
455	Henan	2008年河南省浚县冬小麦需肥规律试验
456	Henan	2008年河南省浚县冬小麦需肥规律试验
457	Henan	2008年河南省浚县冬小麦需肥规律试验
458	Henan	2008年河南省浚县冬小麦需肥规律试验
459	Henan	2008年河南省浚县冬小麦需肥规律试验
460	Henan	2009年河南省浚县冬小麦氮肥运筹试验
461	Henan	2009年河南省浚县冬小麦氮肥运筹试验
462	Henan	2009年河南省浚县冬小麦氮肥运筹试验
463	Henan	2009年河南省浚县冬小麦氮肥运筹试验
464	Henan	2009年河南省浚县冬小麦氮肥运筹试验
465	Henan	2009年河南省浚县冬小麦氮肥运筹试验
466	Henan	2009年河南省浚县冬小麦氮肥运筹试验
467	Henan	2009年河南省浚县冬小麦氮肥运筹试验
468	Henan	2009年河南省浚县冬小麦氮肥运筹试验
469	Henan	2009年河南省浚县冬小麦氮肥运筹试验
470	Henan	2009年河南省浚县冬小麦氮肥运筹试验
471	Henan	2009年河南省浚县冬小麦氮肥运筹试验
472	Henan	2009年河南省浚县冬小麦氮肥运筹试验
473	Henan	2009年河南省浚县冬小麦氮肥运筹试验
474	Henan	2009年河南省浚县冬小麦氮肥运筹试验
475	Henan	2009年河南省浚县冬小麦氮肥运筹试验
476	Henan	2009年河南省浚县冬小麦氮肥运筹试验		9732.89	8911.8	821.09	8.43624
477	Henan	2009年河南省浚县冬小麦氮肥运筹试验		10297.4	8911.8	1385.57	13.4556
478	Henan	2009年河南省浚县冬小麦氮肥运筹试验		10365.8	8911.8	1453.99	14.0268
479	Henan	2009年河南省浚县冬小麦氮肥运筹试验		10109.2	8911.8	1197.41	11.8447
480	Henan	2009年河南省浚县冬小麦氮肥运筹试验
481	Henan	2009年河南省浚县冬小麦氮肥运筹试验
482	Henan	2009年河南省浚县冬小麦氮肥运筹试验
483	Henan	2009年河南省浚县冬小麦氮肥运筹试验
484	Henan	2009年河南省浚县冬小麦氮肥运筹试验
485	Henan	2009年河南省浚县冬小麦氮肥运筹试验
486	Henan	2009年河南省浚县冬小麦氮肥运筹试验
487	Henan	2009年河南省浚县冬小麦氮肥运筹试验
488	Henan	2009年河南省浚县冬小麦氮肥用量试验
489	Henan	2009年河南省浚县冬小麦氮肥用量试验
490	Henan	2009年河南省浚县冬小麦氮肥用量试验
491	Henan	2009年河南省浚县冬小麦氮肥用量试验
492	Henan	2009年河南省浚县冬小麦氮肥用量试验
493	Henan	2009年河南省浚县冬小麦氮肥用量试验
494	Henan	2009年河南省浚县冬小麦氮肥用量试验
495	Henan	2009年河南省浚县冬小麦氮肥用量试验
496	Henan	2009年河南省浚县冬小麦氮肥用量试验
497	Henan	2009年河南省浚县冬小麦氮肥用量试验
498	Henan	2009年河南省浚县冬小麦氮肥用量试验
499	Henan	2009年河南省浚县冬小麦氮肥用量试验
500	Henan	2009年河南省浚县冬小麦氮肥用量试验		9903.95	8911.8	992.15	10.0177
501	Henan	2009年河南省浚县冬小麦氮肥用量试验		9938.16	8911.8	1026.36	10.3275
502	Henan	2009年河南省浚县冬小麦氮肥用量试验		10075	8911.8	1163.2	11.5454
503	Henan	2009年河南省浚县冬小麦氮肥用量试验		10211.8	8911.8	1300.04	12.7307
504	Henan	2009年河南省浚县冬小麦氮肥用量试验
505	Henan	2009年河南省浚县冬小麦氮肥用量试验
506	Henan	2009年河南省浚县冬小麦氮肥用量试验
507	Henan	2009年河南省浚县冬小麦氮肥用量试验
508	Henan	2009年河南省浚县冬小麦氮肥用量试验
509	Henan	2009年河南省浚县冬小麦氮肥用量试验
510	Henan	2009年河南省浚县冬小麦氮肥用量试验
511	Henan	2009年河南省浚县冬小麦氮肥用量试验
544	Henan	2002-2003小麦河南省洛阳孟津县送庄乡朱寨村养分监测村OPT试验		6243	4375.7	1867.3	29.9103		6243	4875.3	1367.7	21.9077		6243	5580.3	662.7	10.6151
545	Henan	2002-2003小麦河南省洛阳孟津县送庄乡朱寨村养分监测村OPT试验		6120	4375.7	1744.3	28.5016		6120	4875.3	1244.7	20.3382		6120	5580.3	539.7	8.81863
546	Henan	2002-2003小麦河南省洛阳孟津县送庄乡朱寨村养分监测村OPT试验		5637	4375.7	1261.3	22.3754		5637	4875.3	761.7	13.5125		5637	5580.3	56.7	1.00585
547	Henan	2002-2003小麦河南省洛阳孟津县送庄乡朱寨村养分监测村OPT试验
548	Henan	2002-2003小麦河南省洛阳孟津县送庄乡朱寨村养分监测村OPT试验
549	Henan	2002-2003小麦河南省洛阳孟津县送庄乡朱寨村养分监测村OPT试验
550	Henan	2002-2003小麦河南省洛阳孟津县送庄乡朱寨村养分监测村OPT试验
551	Henan	2002-2003小麦河南省洛阳孟津县送庄乡朱寨村养分监测村OPT试验
552	Henan	2002-2003小麦河南省洛阳孟津县送庄乡朱寨村养分监测村OPT试验
553	Henan	2002-2003小麦河南省洛阳孟津县送庄乡朱寨村养分监测村OPT试验
554	Henan	2002-2003小麦河南省洛阳孟津县送庄乡朱寨村养分监测村OPT试验
555	Henan	2002-2003小麦河南省洛阳孟津县送庄乡朱寨村养分监测村OPT试验
556	Henan	2002-2003小麦河南省洛阳孟津县送庄乡朱寨村养分监测村OPT试验
557	Henan	2002-2003小麦河南省洛阳孟津县送庄乡朱寨村养分监测村OPT试验
558	Henan	2002-2003小麦河南省洛阳孟津县送庄乡朱寨村养分监测村OPT试验
575	Henan	2002-2003小麦河南省驻马店遂平县和兴乡养分村OPT试验		3950	3783.3	166.7	4.22025		3950	3466.7	483.3	12.2354		3950	3383.3	566.7	14.3468
576	Henan	2002-2003小麦河南省驻马店遂平县和兴乡养分村OPT试验		4150	3783.3	366.7	8.83614		4150	3466.7	683.3	16.4651		4150	3383.3	766.7	18.4747
577	Henan	2002-2003小麦河南省驻马店遂平县和兴乡养分村OPT试验		4250	3783.3	466.7	10.9812		4250	3466.7	783.3	18.4306		4250	3383.3	866.7	20.3929
578	Henan	2002-2003小麦河南省驻马店遂平县和兴乡养分村OPT试验
579	Henan	2002-2003小麦河南省驻马店遂平县和兴乡养分村OPT试验
580	Henan	2002-2003小麦河南省驻马店遂平县和兴乡养分村OPT试验
581	Henan	2002-2003小麦河南省驻马店遂平县和兴乡养分村OPT试验
582	Henan	2002-2003小麦河南省驻马店遂平县和兴乡养分村OPT试验
583	Henan	2002-2003小麦河南省驻马店遂平县和兴乡养分村OPT试验
584	Henan	2002-2003小麦河南省驻马店遂平县和兴乡养分村OPT试验
585	Henan	2002-2003小麦河南省驻马店遂平县和兴乡养分村OPT试验
586	Henan	2002-2003小麦河南省驻马店遂平县和兴乡养分村OPT试验
587	Henan	2002-2003小麦河南省驻马店遂平县和兴乡养分村OPT试验
588	Henan	2002-2003小麦河南省驻马店遂平县和兴乡养分村OPT试验
589	Henan	2002-2003小麦河南省驻马店遂平县和兴乡养分村OPT试验
590	Henan	2003-2004小麦河南驻马店遂平和兴OPT
591	Henan	2003-2004小麦河南驻马店遂平和兴OPT
592	Henan	2003-2004小麦河南驻马店遂平和兴OPT
593	Henan	2003-2004小麦河南驻马店遂平和兴OPT
594	Henan	2003-2004小麦河南驻马店遂平和兴OPT
595	Henan	2003-2004小麦河南驻马店遂平和兴OPT
596	Henan	2003-2004小麦河南驻马店遂平和兴OPT
597	Henan	2003-2004小麦河南驻马店遂平和兴OPT
598	Henan	2003-2004小麦河南驻马店遂平和兴OPT
599	Henan	2003-2004小麦河南驻马店遂平和兴OPT
600	Henan	2003-2004小麦河南驻马店遂平和兴OPT
601	Henan	2003-2004小麦河南驻马店遂平和兴OPT
602	Henan	2003-2004小麦河南驻马店遂平和兴OPT		8754	3418.5	5335.5	60.9493		8754	8066	688	7.85926		8754	7603.5	1150.5	13.1426
603	Henan	2003-2004小麦河南驻马店遂平和兴OPT		8404.5	3418.5	4986	59.3254		8404.5	8066	338.5	4.0276		8404.5	7603.5	801	9.53061
604	Henan	2003-2004小麦河南驻马店遂平和兴OPT		8505	3418.5	5086.5	59.806		8505	8066	439	5.16167		8505	7603.5	901.5	10.5996
623	Henan	2004-2005小麦河南洛阳孟津OPT
624	Henan	2004-2005小麦河南洛阳孟津OPT
625	Henan	2004-2005小麦河南洛阳孟津OPT
626	Henan	2004-2005小麦河南洛阳孟津OPT
627	Henan	2004-2005小麦河南洛阳孟津OPT
628	Henan	2004-2005小麦河南洛阳孟津OPT
629	Henan	2004-2005小麦河南洛阳孟津OPT
630	Henan	2004-2005小麦河南洛阳孟津OPT
631	Henan	2004-2005小麦河南洛阳孟津OPT
632	Henan	2004-2005小麦河南洛阳孟津OPT
633	Henan	2004-2005小麦河南洛阳孟津OPT
634	Henan	2004-2005小麦河南洛阳孟津OPT
635	Henan	2004-2005小麦河南洛阳孟津OPT		8430	7185	1245	14.7687		8430	7860	570	6.76157		8430	7790	640	7.59193
636	Henan	2004-2005小麦河南洛阳孟津OPT		8355	7185	1170	14.0036		8355	7860	495	5.9246		8355	7790	565	6.76242
637	Henan	2004-2005小麦河南洛阳孟津OPT		8535	7185	1350	15.8172		8535	7860	675	7.90861		8535	7790	745	8.72876
638	Henan	2004-2005小麦河南驻马店遂平和兴OPT
639	Henan	2004-2005小麦河南驻马店遂平和兴OPT
640	Henan	2004-2005小麦河南驻马店遂平和兴OPT
641	Henan	2004-2005小麦河南驻马店遂平和兴OPT
642	Henan	2004-2005小麦河南驻马店遂平和兴OPT
643	Henan	2004-2005小麦河南驻马店遂平和兴OPT
644	Henan	2004-2005小麦河南驻马店遂平和兴OPT
645	Henan	2004-2005小麦河南驻马店遂平和兴OPT
646	Henan	2004-2005小麦河南驻马店遂平和兴OPT
647	Henan	2004-2005小麦河南驻马店遂平和兴OPT
648	Henan	2004-2005小麦河南驻马店遂平和兴OPT
649	Henan	2004-2005小麦河南驻马店遂平和兴OPT
650	Henan	2004-2005小麦河南驻马店遂平和兴OPT		8290	3520	4770	57.5392		8290	7712	578	6.97226		8290	7377	913	11.0133
651	Henan	2004-2005小麦河南驻马店遂平和兴OPT		8302	3520	4782	57.6006		8302	7712	590	7.10672		8302	7377	925	11.1419
652	Henan	2004-2005小麦河南驻马店遂平和兴OPT		8275	3520	4755	57.4622		8275	7712	563	6.80363		8275	7377	898	10.852
674	Henan	2005-2006小麦驻马店市遂平县和兴乡和兴村opt试验		7620	4950	2670	35.0394		7620	6750	870	11.4173		7620	6150	1470	19.2913
675	Henan	2005-2006小麦驻马店市遂平县和兴乡和兴村opt试验		7650	4950	2700	35.2941		7650	6750	900	11.7647		7650	6150	1500	19.6078
676	Henan	2005-2006小麦驻马店市遂平县和兴乡和兴村opt试验		7905	4950	2955	37.3814		7905	6750	1155	14.611		7905	6150	1755	22.2011
677	Henan	2005-2006小麦驻马店市遂平县和兴乡和兴村opt试验
678	Henan	2005-2006小麦驻马店市遂平县和兴乡和兴村opt试验
679	Henan	2005-2006小麦驻马店市遂平县和兴乡和兴村opt试验
680	Henan	2005-2006小麦驻马店市遂平县和兴乡和兴村opt试验
681	Henan	2005-2006小麦驻马店市遂平县和兴乡和兴村opt试验
682	Henan	2005-2006小麦驻马店市遂平县和兴乡和兴村opt试验
683	Henan	2005-2006小麦驻马店市遂平县和兴乡和兴村opt试验
684	Henan	2005-2006小麦驻马店市遂平县和兴乡和兴村opt试验
685	Henan	2005-2006小麦驻马店市遂平县和兴乡和兴村opt试验
686	Henan	2005-2006小麦驻马店市遂平县和兴乡和兴村opt试验
687	Henan	2005-2006小麦驻马店市遂平县和兴乡和兴村opt试验
688	Henan	2005-2006小麦驻马店市遂平县和兴乡和兴村opt试验
689	Henan	2005-2006小麦洛阳孟津县送庄乡朱寨村opt试验		7500	5250	2250	30		7500	6450	1050	14		7500	6000	1500	20
690	Henan	2005-2006小麦洛阳孟津县送庄乡朱寨村opt试验		7320	5250	2070	28.2787		7320	6450	870	11.8852		7320	6000	1320	18.0328
691	Henan	2005-2006小麦洛阳孟津县送庄乡朱寨村opt试验		7230	5250	1980	27.3859		7230	6450	780	10.7884		7230	6000	1230	17.0124
692	Henan	2005-2006小麦洛阳孟津县送庄乡朱寨村opt试验
693	Henan	2005-2006小麦洛阳孟津县送庄乡朱寨村opt试验
694	Henan	2005-2006小麦洛阳孟津县送庄乡朱寨村opt试验
695	Henan	2005-2006小麦洛阳孟津县送庄乡朱寨村opt试验
696	Henan	2005-2006小麦洛阳孟津县送庄乡朱寨村opt试验
697	Henan	2005-2006小麦洛阳孟津县送庄乡朱寨村opt试验
698	Henan	2005-2006小麦洛阳孟津县送庄乡朱寨村opt试验
699	Henan	2005-2006小麦洛阳孟津县送庄乡朱寨村opt试验
700	Henan	2005-2006小麦洛阳孟津县送庄乡朱寨村opt试验
701	Henan	2005-2006小麦洛阳孟津县送庄乡朱寨村opt试验
702	Henan	2005-2006小麦洛阳孟津县送庄乡朱寨村opt试验
703	Henan	2005-2006小麦洛阳孟津县送庄乡朱寨村opt试验
704	Henan	2005-2006小麦南阳市农科所opt试验		6900	5595	1305	18.913		6900	6135	765	11.087		6900	6630	270	3.91304
705	Henan	2005-2006小麦南阳市农科所opt试验		7200	5595	1605	22.2917		7200	6135	1065	14.7917		7200	6630	570	7.91667
706	Henan	2005-2006小麦南阳市农科所opt试验		7275	5595	1680	23.0928		7275	6135	1140	15.6701		7275	6630	645	8.86598
707	Henan	2005-2006小麦南阳市农科所opt试验
708	Henan	2005-2006小麦南阳市农科所opt试验
709	Henan	2005-2006小麦南阳市农科所opt试验
710	Henan	2005-2006小麦南阳市农科所opt试验
711	Henan	2005-2006小麦南阳市农科所opt试验
712	Henan	2005-2006小麦南阳市农科所opt试验
713	Henan	2005-2006小麦南阳市农科所opt试验
714	Henan	2005-2006小麦南阳市农科所opt试验
715	Henan	2005-2006小麦南阳市农科所opt试验
716	Henan	2005-2006小麦南阳市农科所opt试验
717	Henan	2005-2006小麦南阳市农科所opt试验
718	Henan	2005-2006小麦南阳市农科所opt试验
719	Henan	2005-2006小麦新乡市延津县平陵村opt试验		7200	5250	1950	27.0833		7200	6525	675	9.375		7200	6150	1050	14.5833
720	Henan	2005-2006小麦新乡市延津县平陵村opt试验		7350	5250	2100	28.5714		7350	6525	825	11.2245		7350	6150	1200	16.3265
721	Henan	2005-2006小麦新乡市延津县平陵村opt试验		7500	5250	2250	30		7500	6525	975	13		7500	6150	1350	18
722	Henan	2005-2006小麦新乡市延津县平陵村opt试验
723	Henan	2005-2006小麦新乡市延津县平陵村opt试验
724	Henan	2005-2006小麦新乡市延津县平陵村opt试验
725	Henan	2005-2006小麦新乡市延津县平陵村opt试验
726	Henan	2005-2006小麦新乡市延津县平陵村opt试验
727	Henan	2005-2006小麦新乡市延津县平陵村opt试验
728	Henan	2005-2006小麦新乡市延津县平陵村opt试验
729	Henan	2005-2006小麦新乡市延津县平陵村opt试验
730	Henan	2005-2006小麦新乡市延津县平陵村opt试验
731	Henan	2005-2006小麦新乡市延津县平陵村opt试验
732	Henan	2005-2006小麦新乡市延津县平陵村opt试验
733	Henan	2005-2006小麦新乡市延津县平陵村opt试验
734	Henan	2005-2006小麦驻马店市驿城区水屯镇新坡村opt试验		7125	4500	2625	36.8421		7125	6300	825	11.5789		7125	5700	1425	20
735	Henan	2005-2006小麦驻马店市驿城区水屯镇新坡村opt试验		7230	4500	2730	37.7593		7230	6300	930	12.8631		7230	5700	1530	21.1618
736	Henan	2005-2006小麦驻马店市驿城区水屯镇新坡村opt试验		7245	4500	2745	37.8882		7245	6300	945	13.0435		7245	5700	1545	21.3251
737	Henan	2005-2006小麦驻马店市驿城区水屯镇新坡村opt试验
738	Henan	2005-2006小麦驻马店市驿城区水屯镇新坡村opt试验
739	Henan	2005-2006小麦驻马店市驿城区水屯镇新坡村opt试验
740	Henan	2005-2006小麦驻马店市驿城区水屯镇新坡村opt试验
741	Henan	2005-2006小麦驻马店市驿城区水屯镇新坡村opt试验
742	Henan	2005-2006小麦驻马店市驿城区水屯镇新坡村opt试验
743	Henan	2005-2006小麦驻马店市驿城区水屯镇新坡村opt试验
744	Henan	2005-2006小麦驻马店市驿城区水屯镇新坡村opt试验
745	Henan	2005-2006小麦驻马店市驿城区水屯镇新坡村opt试验
746	Henan	2005-2006小麦驻马店市驿城区水屯镇新坡村opt试验
747	Henan	2005-2006小麦驻马店市驿城区水屯镇新坡村opt试验
748	Henan	2005-2006小麦驻马店市驿城区水屯镇新坡村opt试验
918	Henan	2006-2007洛阳孟津县送庄乡朱寨村优质小麦OPT试验		8331	5885.3	2445.7	29.3566		8331	6239.7	2091.3	25.1026		8331	6923	1408	16.9007
919	Henan	2006-2007洛阳孟津县送庄乡朱寨村优质小麦OPT试验		8403	5885.3	2517.7	29.9619		8403	6239.7	2163.3	25.7444		8403	6923	1480	17.6128
920	Henan	2006-2007洛阳孟津县送庄乡朱寨村优质小麦OPT试验		8420	5885.3	2534.7	30.1033		8420	6239.7	2180.3	25.8943		8420	6923	1497	17.7791
921	Henan	2006-2007洛阳孟津县送庄乡朱寨村优质小麦OPT试验
922	Henan	2006-2007洛阳孟津县送庄乡朱寨村优质小麦OPT试验
923	Henan	2006-2007洛阳孟津县送庄乡朱寨村优质小麦OPT试验
924	Henan	2006-2007洛阳孟津县送庄乡朱寨村优质小麦OPT试验
925	Henan	2006-2007洛阳孟津县送庄乡朱寨村优质小麦OPT试验
926	Henan	2006-2007洛阳孟津县送庄乡朱寨村优质小麦OPT试验
927	Henan	2006-2007洛阳孟津县送庄乡朱寨村优质小麦OPT试验
928	Henan	2006-2007洛阳孟津县送庄乡朱寨村优质小麦OPT试验
929	Henan	2006-2007洛阳孟津县送庄乡朱寨村优质小麦OPT试验
930	Henan	2006-2007洛阳孟津县送庄乡朱寨村优质小麦OPT试验							6798	5759.3	1038.7	15.2795		6798	6130.7	667.3	9.81612
931	Henan	2006-2007洛阳孟津县送庄乡朱寨村优质小麦OPT试验							6732	5759.3	972.7	14.4489		6732	6130.7	601.3	8.93197
932	Henan	2006-2007洛阳孟津县送庄乡朱寨村优质小麦OPT试验							6890	5759.3	1130.7	16.4107		6890	6130.7	759.3	11.0203
933	Henan	2006-2007洛阳孟津县送庄乡朱寨村优质小麦OPT试验
934	Henan	2006-2007洛阳孟津县送庄乡朱寨村优质小麦OPT试验
935	Henan	2006-2007洛阳孟津县送庄乡朱寨村优质小麦OPT试验
936	Henan	2006-2007洛阳孟津县送庄乡朱寨村优质小麦OPT试验
937	Henan	2006-2007洛阳孟津县送庄乡朱寨村优质小麦OPT试验
938	Henan	2006-2007洛阳孟津县送庄乡朱寨村优质小麦OPT试验
939	Henan	2006-2007洛阳孟津县送庄乡朱寨村优质小麦OPT试验
940	Henan	2006-2007洛阳孟津县送庄乡朱寨村优质小麦OPT试验
941	Henan	2006-2007洛阳孟津县送庄乡朱寨村优质小麦OPT试验
942	Henan	2006-2007洛阳孟津县送庄乡朱寨村优质小麦OPT试验
943	Henan	2006-2007洛阳孟津县送庄乡朱寨村优质小麦OPT试验
944	Henan	2006-2007洛阳孟津县送庄乡朱寨村优质小麦OPT试验
945	Henan	2006-2007新乡市延津县司寨乡平陵村优质小麦OPT试验		8708	5940	2768	31.7869		8708	6300.3	2407.7	27.6493		8708	6779.3	1928.7	22.1486
946	Henan	2006-2007新乡市延津县司寨乡平陵村优质小麦OPT试验		8702	5940	2762	31.7398		8702	6300.3	2401.7	27.5994		8702	6779.3	1922.7	22.0949
947	Henan	2006-2007新乡市延津县司寨乡平陵村优质小麦OPT试验		8837	5940	2897	32.7826		8837	6300.3	2536.7	28.7054		8837	6779.3	2057.7	23.2851
948	Henan	2006-2007新乡市延津县司寨乡平陵村优质小麦OPT试验
949	Henan	2006-2007新乡市延津县司寨乡平陵村优质小麦OPT试验
950	Henan	2006-2007新乡市延津县司寨乡平陵村优质小麦OPT试验
951	Henan	2006-2007新乡市延津县司寨乡平陵村优质小麦OPT试验
952	Henan	2006-2007新乡市延津县司寨乡平陵村优质小麦OPT试验
953	Henan	2006-2007新乡市延津县司寨乡平陵村优质小麦OPT试验
954	Henan	2006-2007新乡市延津县司寨乡平陵村优质小麦OPT试验
955	Henan	2006-2007新乡市延津县司寨乡平陵村优质小麦OPT试验
956	Henan	2006-2007新乡市延津县司寨乡平陵村优质小麦OPT试验
957	Henan	2006-2007新乡市延津县司寨乡平陵村优质小麦OPT试验
958	Henan	2006-2007新乡市延津县司寨乡平陵村优质小麦OPT试验
959	Henan	2006-2007新乡市延津县司寨乡平陵村优质小麦OPT试验
960	Henan	2007-2008新乡延津县司寨乡平陵村小麦养分吸收规律研究
961	Henan	2007-2008新乡延津县司寨乡平陵村小麦养分吸收规律研究
962	Henan	2007-2008新乡延津县司寨乡平陵村小麦养分吸收规律研究
963	Henan	2007-2008新乡延津县司寨乡平陵村小麦养分吸收规律研究
964	Henan	2007-2008新乡延津县司寨乡平陵村小麦养分吸收规律研究
965	Henan	2007-2008新乡延津县司寨乡平陵村小麦养分吸收规律研究
966	Henan	2007-2008新乡延津县司寨乡平陵村小麦氮肥用量试验
967	Henan	2007-2008新乡延津县司寨乡平陵村小麦氮肥用量试验
968	Henan	2007-2008新乡延津县司寨乡平陵村小麦氮肥用量试验
969	Henan	2007-2008新乡延津县司寨乡平陵村小麦氮肥用量试验
970	Henan	2007-2008新乡延津县司寨乡平陵村小麦氮肥用量试验
971	Henan	2007-2008新乡延津县司寨乡平陵村小麦氮肥用量试验
972	Henan	2007-2008新乡延津县司寨乡平陵村小麦氮肥用量试验
973	Henan	2007-2008新乡延津县司寨乡平陵村小麦氮肥用量试验
974	Henan	2007-2008新乡延津县司寨乡平陵村小麦氮肥用量试验
975	Henan	2007-2008新乡延津县司寨乡平陵村小麦氮肥用量试验
976	Henan	2007-2008新乡延津县司寨乡平陵村小麦氮肥用量试验
977	Henan	2007-2008新乡延津县司寨乡平陵村小麦氮肥用量试验
978	Henan	2007-2008新乡延津县司寨乡平陵村小麦氮肥用量试验
979	Henan	2007-2008新乡延津县司寨乡平陵村小麦氮肥用量试验
980	Henan	2007-2008新乡延津县司寨乡平陵村小麦氮肥用量试验
981	Henan	2007-2008新乡延津县司寨乡平陵村小麦氮肥用量试验
982	Henan	2007-2008新乡延津县司寨乡平陵村小麦氮肥用量试验
983	Henan	2007-2008新乡延津县司寨乡平陵村小麦氮肥用量试验
984	Henan	2007-2008驻马店驿城区水屯镇新坡村冬小麦OPT定位试验		7893	5790	2103	26.6439		7893	6075	1818	23.0331		7893	7050	843	10.6803
985	Henan	2007-2008驻马店驿城区水屯镇新坡村冬小麦OPT定位试验		8127	5790	2337	28.756		8127	6075	2052	25.2492		8127	7050	1077	13.2521
986	Henan	2007-2008驻马店驿城区水屯镇新坡村冬小麦OPT定位试验		8280	5790	2490	30.0725		8280	6075	2205	26.6304		8280	7050	1230	14.8551
987	Henan	2007-2008驻马店驿城区水屯镇新坡村冬小麦OPT定位试验
988	Henan	2007-2008驻马店驿城区水屯镇新坡村冬小麦OPT定位试验
989	Henan	2007-2008驻马店驿城区水屯镇新坡村冬小麦OPT定位试验
990	Henan	2007-2008驻马店驿城区水屯镇新坡村冬小麦OPT定位试验
991	Henan	2007-2008驻马店驿城区水屯镇新坡村冬小麦OPT定位试验
992	Henan	2007-2008驻马店驿城区水屯镇新坡村冬小麦OPT定位试验
993	Henan	2007-2008驻马店驿城区水屯镇新坡村冬小麦OPT定位试验
994	Henan	2007-2008驻马店驿城区水屯镇新坡村冬小麦OPT定位试验
995	Henan	2007-2008驻马店驿城区水屯镇新坡村冬小麦OPT定位试验
996	Henan	2007-2008驻马店驿城区水屯镇新坡村冬小麦OPT定位试验
997	Henan	2007-2008驻马店驿城区水屯镇新坡村冬小麦OPT定位试验
998	Henan	2007-2008驻马店驿城区水屯镇新坡村冬小麦OPT定位试验
999	Henan	2007-2008驻马店驿城区水屯镇新坡村冬小麦OPT定位试验
1000	Henan	2007-2008驻马店驿城区水屯镇新坡村冬小麦OPT定位试验
1001	Henan	2007-2008驻马店驿城区水屯镇新坡村冬小麦OPT定位试验
1002	Henan	2007-2008新乡延津县司寨乡平陵村冬小麦OPT定位试验		7931	5241	2690	33.9175		7931	6613.3	1317.7	16.6146		7931	6803	1128	14.2227
1003	Henan	2007-2008新乡延津县司寨乡平陵村冬小麦OPT定位试验		8124	5241	2883	35.4874		8124	6613.3	1510.7	18.5955		8124	6803	1321	16.2605
1004	Henan	2007-2008新乡延津县司寨乡平陵村冬小麦OPT定位试验		8276	5241	3035	36.6723		8276	6613.3	1662.7	20.0906		8276	6803	1473	17.7985
1005	Henan	2007-2008新乡延津县司寨乡平陵村冬小麦OPT定位试验
1006	Henan	2007-2008新乡延津县司寨乡平陵村冬小麦OPT定位试验
1007	Henan	2007-2008新乡延津县司寨乡平陵村冬小麦OPT定位试验
1008	Henan	2007-2008新乡延津县司寨乡平陵村冬小麦OPT定位试验
1009	Henan	2007-2008新乡延津县司寨乡平陵村冬小麦OPT定位试验
1010	Henan	2007-2008新乡延津县司寨乡平陵村冬小麦OPT定位试验
1011	Henan	2007-2008新乡延津县司寨乡平陵村冬小麦OPT定位试验
1012	Henan	2007-2008新乡延津县司寨乡平陵村冬小麦OPT定位试验
1013	Henan	2007-2008新乡延津县司寨乡平陵村冬小麦OPT定位试验
1014	Henan	2007-2008新乡延津县司寨乡平陵村冬小麦OPT定位试验
1015	Henan	2007-2008新乡延津县司寨乡平陵村冬小麦OPT定位试验
1016	Henan	2007-2008新乡延津县司寨乡平陵村冬小麦OPT定位试验
1017	Henan	2007-2008新乡延津县司寨乡平陵村冬小麦OPT定位试验
1018	Henan	2007-2008新乡延津县司寨乡平陵村冬小麦OPT定位试验
1019	Henan	2007-2008新乡延津县司寨乡平陵村冬小麦OPT定位试验
1020	Henan	2007-2008驻马店农科所小麦轮作体系养分需求与供应同步机制研究
1021	Henan	2007-2008驻马店农科所小麦轮作体系养分需求与供应同步机制研究
1022	Henan	2007-2008驻马店农科所小麦轮作体系养分需求与供应同步机制研究
1023	Henan	2007-2008驻马店农科所小麦轮作体系养分需求与供应同步机制研究												6609	6120.3	488.7	7.39446
1024	Henan	2007-2008驻马店农科所小麦轮作体系养分需求与供应同步机制研究												6452	6120.3	331.7	5.14104
1025	Henan	2007-2008驻马店农科所小麦轮作体系养分需求与供应同步机制研究												6200	6120.3	79.7	1.28548
1026	Henan	2007-2008驻马店农科所小麦轮作体系养分需求与供应同步机制研究												6903	6120.3	782.7	11.3385
1027	Henan	2007-2008驻马店农科所小麦轮作体系养分需求与供应同步机制研究												6729	6120.3	608.7	9.04592
1028	Henan	2007-2008驻马店农科所小麦轮作体系养分需求与供应同步机制研究												6618	6120.3	497.7	7.5204
1029	Henan	2007-2008驻马店农科所小麦轮作体系养分需求与供应同步机制研究
1030	Henan	2007-2008驻马店农科所小麦轮作体系养分需求与供应同步机制研究
1031	Henan	2007-2008驻马店农科所小麦轮作体系养分需求与供应同步机制研究
1032	Henan	2007-2008驻马店农科所小麦轮作体系养分需求与供应同步机制研究												7383	6840.3	542.7	7.35067
1033	Henan	2007-2008驻马店农科所小麦轮作体系养分需求与供应同步机制研究												7232	6840.3	391.7	5.41621
1034	Henan	2007-2008驻马店农科所小麦轮作体系养分需求与供应同步机制研究												6986	6840.3	145.7	2.0856
1035	Henan	2007-2008驻马店农科所小麦轮作体系养分需求与供应同步机制研究												7760	6840.3	919.7	11.8518
1036	Henan	2007-2008驻马店农科所小麦轮作体系养分需求与供应同步机制研究												7583	6840.3	742.7	9.79428
1037	Henan	2007-2008驻马店农科所小麦轮作体系养分需求与供应同步机制研究												7383	6840.3	542.7	7.35067
1038	Henan	2007-2008驻马店农科所小麦轮作体系养分需求与供应同步机制研究
1039	Henan	2007-2008驻马店农科所小麦轮作体系养分需求与供应同步机制研究
1040	Henan	2007-2008驻马店农科所小麦轮作体系养分需求与供应同步机制研究
1041	Henan	2007-2008驻马店农科所小麦轮作体系养分需求与供应同步机制研究												5847	5280	567	9.69728
1042	Henan	2007-2008驻马店农科所小麦轮作体系养分需求与供应同步机制研究												5649	5280	369	6.53213
1043	Henan	2007-2008驻马店农科所小麦轮作体系养分需求与供应同步机制研究												5379	5280	99	1.84049
1044	Henan	2007-2008驻马店农科所小麦轮作体系养分需求与供应同步机制研究												6158	5280	878	14.2579
1045	Henan	2007-2008驻马店农科所小麦轮作体系养分需求与供应同步机制研究												5982	5280	702	11.7352
1046	Henan	2007-2008驻马店农科所小麦轮作体系养分需求与供应同步机制研究												5861	5280	581	9.91298
1047	Henan	2007-2008驻马店农科所小麦轮作体系养分需求与供应同步机制研究
1048	Henan	2007-2008驻马店农科所小麦轮作体系养分需求与供应同步机制研究
1049	Henan	2007-2008驻马店农科所小麦轮作体系养分需求与供应同步机制研究
1110	Henan	2007-2008新乡延津县司寨乡平陵村氮肥不同基追比对小麦养分需求与供应的影响
1111	Henan	2007-2008新乡延津县司寨乡平陵村氮肥不同基追比对小麦养分需求与供应的影响
1112	Henan	2007-2008新乡延津县司寨乡平陵村氮肥不同基追比对小麦养分需求与供应的影响
1113	Henan	2007-2008新乡延津县司寨乡平陵村氮肥不同基追比对小麦养分需求与供应的影响
1114	Henan	2007-2008新乡延津县司寨乡平陵村氮肥不同基追比对小麦养分需求与供应的影响
1115	Henan	2007-2008新乡延津县司寨乡平陵村氮肥不同基追比对小麦养分需求与供应的影响
1116	Henan	2007-2008新乡延津县司寨乡平陵村氮肥不同基追比对小麦养分需求与供应的影响
1117	Henan	2007-2008新乡延津县司寨乡平陵村氮肥不同基追比对小麦养分需求与供应的影响
1118	Henan	2007-2008新乡延津县司寨乡平陵村氮肥不同基追比对小麦养分需求与供应的影响
1119	Henan	2007-2008新乡延津县司寨乡平陵村氮肥不同基追比对小麦养分需求与供应的影响		7800	5396	2404	30.8205
1120	Henan	2007-2008新乡延津县司寨乡平陵村氮肥不同基追比对小麦养分需求与供应的影响		7992	5396	2596	32.4825
1121	Henan	2007-2008新乡延津县司寨乡平陵村氮肥不同基追比对小麦养分需求与供应的影响		8142	5396	2746	33.7264
1122	Henan	2007-2008新乡延津县司寨乡平陵村氮肥不同基追比对小麦养分需求与供应的影响
1123	Henan	2007-2008新乡延津县司寨乡平陵村氮肥不同基追比对小麦养分需求与供应的影响
1124	Henan	2007-2008新乡延津县司寨乡平陵村氮肥不同基追比对小麦养分需求与供应的影响
1125	Henan	2007-2008新乡延津县司寨乡平陵村钾肥不同基追比对小麦养分需求与供应的影响
1126	Henan	2007-2008新乡延津县司寨乡平陵村钾肥不同基追比对小麦养分需求与供应的影响
1127	Henan	2007-2008新乡延津县司寨乡平陵村钾肥不同基追比对小麦养分需求与供应的影响
1128	Henan	2007-2008新乡延津县司寨乡平陵村钾肥不同基追比对小麦养分需求与供应的影响												7473	6242.3	1230.7	16.4686
1129	Henan	2007-2008新乡延津县司寨乡平陵村钾肥不同基追比对小麦养分需求与供应的影响												7577	6242.3	1334.7	17.6152
1130	Henan	2007-2008新乡延津县司寨乡平陵村钾肥不同基追比对小麦养分需求与供应的影响												7673	6242.3	1430.7	18.6459
1131	Henan	2007-2008新乡延津县司寨乡平陵村钾肥不同基追比对小麦养分需求与供应的影响												7749	6242.3	1506.7	19.4438
1132	Henan	2007-2008新乡延津县司寨乡平陵村钾肥不同基追比对小麦养分需求与供应的影响												7812	6242.3	1569.7	20.0934
1133	Henan	2007-2008新乡延津县司寨乡平陵村钾肥不同基追比对小麦养分需求与供应的影响												7893	6242.3	1650.7	20.9135
1134	Henan	2007-2008新乡延津县司寨乡平陵村钾肥不同基追比对小麦养分需求与供应的影响												7991	6242.3	1748.7	21.8834
1135	Henan	2007-2008新乡延津县司寨乡平陵村钾肥不同基追比对小麦养分需求与供应的影响												8105	6242.3	1862.7	22.9821
1136	Henan	2007-2008新乡延津县司寨乡平陵村钾肥不同基追比对小麦养分需求与供应的影响												8193	6242.3	1950.7	23.8093
1137	Henan	2006-2007驻马店市遂平县和兴乡和兴村优质小麦OPT试验		7953	5762.3	2190.7	27.5456		7953	6145.3	1807.7	22.7298		7953	6401.7	1551.3	19.5058
1138	Henan	2006-2007驻马店市遂平县和兴乡和兴村优质小麦OPT试验		8028	5762.3	2265.7	28.2225		8028	6145.3	1882.7	23.4517		8028	6401.7	1626.3	20.2578
1139	Henan	2006-2007驻马店市遂平县和兴乡和兴村优质小麦OPT试验		8106	5762.3	2343.7	28.9132		8106	6145.3	1960.7	24.1883		8106	6401.7	1704.3	21.0252
1140	Henan	2006-2007驻马店市遂平县和兴乡和兴村优质小麦OPT试验
1141	Henan	2006-2007驻马店市遂平县和兴乡和兴村优质小麦OPT试验
1142	Henan	2006-2007驻马店市遂平县和兴乡和兴村优质小麦OPT试验
1143	Henan	2006-2007驻马店市遂平县和兴乡和兴村优质小麦OPT试验
1144	Henan	2006-2007驻马店市遂平县和兴乡和兴村优质小麦OPT试验
1145	Henan	2006-2007驻马店市遂平县和兴乡和兴村优质小麦OPT试验
1146	Henan	2006-2007驻马店市遂平县和兴乡和兴村优质小麦OPT试验
1147	Henan	2006-2007驻马店市遂平县和兴乡和兴村优质小麦OPT试验
1148	Henan	2006-2007驻马店市遂平县和兴乡和兴村优质小麦OPT试验
1149	Henan	2006-2007驻马店市遂平县和兴乡和兴村优质小麦OPT试验							6867	5634.7	1232.3	17.9452		6867	5989	878	12.7858
1150	Henan	2006-2007驻马店市遂平县和兴乡和兴村优质小麦OPT试验							6972	5634.7	1337.3	19.181		6972	5989	983	14.0993
1151	Henan	2006-2007驻马店市遂平县和兴乡和兴村优质小麦OPT试验							7049	5634.7	1414.3	20.0638		7049	5989	1060	15.0376
1152	Henan	2006-2007驻马店市遂平县和兴乡和兴村优质小麦OPT试验
1153	Henan	2006-2007驻马店市遂平县和兴乡和兴村优质小麦OPT试验
1154	Henan	2006-2007驻马店市遂平县和兴乡和兴村优质小麦OPT试验
1155	Henan	2006-2007驻马店市遂平县和兴乡和兴村优质小麦OPT试验
1156	Henan	2006-2007驻马店市遂平县和兴乡和兴村优质小麦OPT试验
1157	Henan	2006-2007驻马店市遂平县和兴乡和兴村优质小麦OPT试验
1158	Henan	2006-2007驻马店市遂平县和兴乡和兴村优质小麦OPT试验
1159	Henan	2006-2007驻马店市遂平县和兴乡和兴村优质小麦OPT试验
1160	Henan	2006-2007驻马店市遂平县和兴乡和兴村优质小麦OPT试验
1161	Henan	2006-2007驻马店市遂平县和兴乡和兴村优质小麦OPT试验
1162	Henan	2006-2007驻马店市遂平县和兴乡和兴村优质小麦OPT试验
1163	Henan	2006-2007驻马店市遂平县和兴乡和兴村优质小麦OPT试验
1164	Henan	2006-2007驻马店市驿城区水屯镇新坡村优质小麦OPT试验		7655	5598.3	2056.7	26.8674		7655	5931	1724	22.5212		7655	6143.7	1511.3	19.7427
1165	Henan	2006-2007驻马店市驿城区水屯镇新坡村优质小麦OPT试验		7553	5598.3	1954.7	25.8798		7553	5931	1622	21.4749		7553	6143.7	1409.3	18.6588
1166	Henan	2006-2007驻马店市驿城区水屯镇新坡村优质小麦OPT试验		7641	5598.3	2042.7	26.7334		7641	5931	1710	22.3793		7641	6143.7	1497.3	19.5956
1167	Henan	2006-2007驻马店市驿城区水屯镇新坡村优质小麦OPT试验
1168	Henan	2006-2007驻马店市驿城区水屯镇新坡村优质小麦OPT试验
1169	Henan	2006-2007驻马店市驿城区水屯镇新坡村优质小麦OPT试验
1170	Henan	2006-2007驻马店市驿城区水屯镇新坡村优质小麦OPT试验
1171	Henan	2006-2007驻马店市驿城区水屯镇新坡村优质小麦OPT试验
1172	Henan	2006-2007驻马店市驿城区水屯镇新坡村优质小麦OPT试验
1173	Henan	2006-2007驻马店市驿城区水屯镇新坡村优质小麦OPT试验
1174	Henan	2006-2007驻马店市驿城区水屯镇新坡村优质小麦OPT试验
1175	Henan	2006-2007驻马店市驿城区水屯镇新坡村优质小麦OPT试验
1176	Henan	2006-2007驻马店市驿城区水屯镇新坡村优质小麦OPT试验							6453	5763.7	689.3	10.6819		6453	5873.3	579.7	8.98342
1177	Henan	2006-2007驻马店市驿城区水屯镇新坡村优质小麦OPT试验							6396	5763.7	632.3	9.88587		6396	5873.3	522.7	8.1723
1178	Henan	2006-2007驻马店市驿城区水屯镇新坡村优质小麦OPT试验							6563	5763.7	799.3	12.1789		6563	5873.3	689.7	10.5089
1179	Henan	2006-2007驻马店市驿城区水屯镇新坡村优质小麦OPT试验
1180	Henan	2006-2007驻马店市驿城区水屯镇新坡村优质小麦OPT试验
1181	Henan	2006-2007驻马店市驿城区水屯镇新坡村优质小麦OPT试验
1182	Henan	2006-2007驻马店市驿城区水屯镇新坡村优质小麦OPT试验
1183	Henan	2006-2007驻马店市驿城区水屯镇新坡村优质小麦OPT试验
1184	Henan	2006-2007驻马店市驿城区水屯镇新坡村优质小麦OPT试验
1185	Henan	2006-2007驻马店市驿城区水屯镇新坡村优质小麦OPT试验
1186	Henan	2006-2007驻马店市驿城区水屯镇新坡村优质小麦OPT试验
1187	Henan	2006-2007驻马店市驿城区水屯镇新坡村优质小麦OPT试验
1188	Henan	2006-2007驻马店市驿城区水屯镇新坡村优质小麦OPT试验
1189	Henan	2006-2007驻马店市驿城区水屯镇新坡村优质小麦OPT试验
1190	Henan	2006-2007驻马店市驿城区水屯镇新坡村优质小麦OPT试验
1191	Henan	2009-2010新乡小麦OPT试验		7945	5136.3	2808.7	35.3518		7945	6480.7	1464.3	18.4305		7945	6667	1278	16.0856
1192	Henan	2009-2010新乡小麦OPT试验		7631	5136.3	2494.7	32.6917		7631	6480.7	1150.3	15.074		7631	6667	964	12.6327
1193	Henan	2009-2010新乡小麦OPT试验		8024	5136.3	2887.7	35.9883		8024	6480.7	1543.3	19.2335		8024	6667	1357	16.9118
1194	Henan	2009-2010新乡小麦OPT试验
1195	Henan	2009-2010新乡小麦OPT试验
1196	Henan	2009-2010新乡小麦OPT试验
1197	Henan	2009-2010新乡小麦OPT试验
1198	Henan	2009-2010新乡小麦OPT试验
1199	Henan	2009-2010新乡小麦OPT试验
1200	Henan	2009-2010新乡小麦OPT试验
1201	Henan	2009-2010新乡小麦OPT试验
1202	Henan	2009-2010新乡小麦OPT试验
1203	Henan	2009-2010新乡小麦OPT试验
1204	Henan	2009-2010新乡小麦OPT试验
1205	Henan	2009-2010新乡小麦OPT试验
1206	Henan	2009-2010新乡小麦OPT试验
1207	Henan	2009-2010新乡小麦OPT试验
1208	Henan	2009-2010新乡小麦OPT试验
1209	Henan	2009-2010洛阳孟津小麦OPT试验		7707	5296.3	2410.7	31.2794		7707	5616	2091	27.1312		7707	6501	1206	15.6481
1210	Henan	2009-2010洛阳孟津小麦OPT试验		7401	5296.3	2104.7	28.438		7401	5616	1785	24.1184		7401	6501	900	12.1605
1211	Henan	2009-2010洛阳孟津小麦OPT试验		7783	5296.3	2486.7	31.9504		7783	5616	2167	27.8427		7783	6501	1282	16.4718
1212	Henan	2009-2010洛阳孟津小麦OPT试验
1213	Henan	2009-2010洛阳孟津小麦OPT试验
1214	Henan	2009-2010洛阳孟津小麦OPT试验
1215	Henan	2009-2010洛阳孟津小麦OPT试验
1216	Henan	2009-2010洛阳孟津小麦OPT试验
1217	Henan	2009-2010洛阳孟津小麦OPT试验
1218	Henan	2009-2010洛阳孟津小麦OPT试验
1219	Henan	2009-2010洛阳孟津小麦OPT试验
1220	Henan	2009-2010洛阳孟津小麦OPT试验
1221	Henan	2009-2010洛阳孟津小麦OPT试验
1222	Henan	2009-2010洛阳孟津小麦OPT试验
1223	Henan	2009-2010洛阳孟津小麦OPT试验
1224	Henan	2009-2010洛阳孟津小麦OPT试验
1225	Henan	2009-2010洛阳孟津小麦OPT试验
1226	Henan	2009-2010洛阳孟津小麦OPT试验
1227	Henan	2009-2010驻马店市水屯小麦OPT试验		7960	4338	3622	45.5025		7960	7043.7	916.3	11.5113		7960	6786.3	1173.7	14.745
1228	Henan	2009-2010驻马店市水屯小麦OPT试验		7645	4338	3307	43.257		7645	7043.7	601.3	7.86527		7645	6786.3	858.7	11.2322
1229	Henan	2009-2010驻马店市水屯小麦OPT试验		8039	4338	3701	46.0381		8039	7043.7	995.3	12.3809		8039	6786.3	1252.7	15.5828
1230	Henan	2009-2010驻马店市水屯小麦OPT试验
1231	Henan	2009-2010驻马店市水屯小麦OPT试验
1232	Henan	2009-2010驻马店市水屯小麦OPT试验
1233	Henan	2009-2010驻马店市水屯小麦OPT试验
1234	Henan	2009-2010驻马店市水屯小麦OPT试验
1235	Henan	2009-2010驻马店市水屯小麦OPT试验
1236	Henan	2009-2010驻马店市水屯小麦OPT试验
1237	Henan	2009-2010驻马店市水屯小麦OPT试验
1238	Henan	2009-2010驻马店市水屯小麦OPT试验
1239	Henan	2009-2010驻马店市水屯小麦OPT试验
1240	Henan	2009-2010驻马店市水屯小麦OPT试验
1241	Henan	2009-2010驻马店市水屯小麦OPT试验
1242	Henan	2009-2010驻马店市水屯小麦OPT试验
1243	Henan	2009-2010驻马店市水屯小麦OPT试验
1244	Henan	2009-2010驻马店市水屯小麦OPT试验
1245	Henan	2009-2010驻马店水屯小麦氮肥用量试验
1246	Henan	2009-2010驻马店水屯小麦氮肥用量试验
1247	Henan	2009-2010驻马店水屯小麦氮肥用量试验
1248	Henan	2009-2010驻马店水屯小麦氮肥用量试验
1249	Henan	2009-2010驻马店水屯小麦氮肥用量试验
1250	Henan	2009-2010驻马店水屯小麦氮肥用量试验
1251	Henan	2009-2010驻马店水屯小麦氮肥用量试验
1252	Henan	2009-2010驻马店水屯小麦氮肥用量试验
1253	Henan	2009-2010驻马店水屯小麦氮肥用量试验
1254	Henan	2009-2010驻马店水屯小麦氮肥用量试验
1255	Henan	2009-2010驻马店水屯小麦氮肥用量试验
1256	Henan	2009-2010驻马店水屯小麦氮肥用量试验
1257	Henan	2009-2010驻马店水屯小麦氮肥用量试验		7504	4295	3209	42.7639
1258	Henan	2009-2010驻马店水屯小麦氮肥用量试验		7895	4295	3600	45.5985
1259	Henan	2009-2010驻马店水屯小麦氮肥用量试验		8051	4295	3756	46.6526
1260	Henan	2009-2010驻马店水屯小麦氮肥用量试验
1261	Henan	2009-2010驻马店水屯小麦氮肥用量试验
1262	Henan	2009-2010驻马店水屯小麦氮肥用量试验
1263	Henan	2009-2010新乡平陵小麦氮素基施的条件试验
1264	Henan	2009-2010新乡平陵小麦氮素基施的条件试验
1265	Henan	2009-2010新乡平陵小麦氮素基施的条件试验
1266	Henan	2009-2010新乡平陵小麦氮素基施的条件试验
1267	Henan	2009-2010新乡平陵小麦氮素基施的条件试验
1268	Henan	2009-2010新乡平陵小麦氮素基施的条件试验
1269	Henan	2009-2010新乡平陵小麦氮素基施的条件试验
1270	Henan	2009-2010新乡平陵小麦氮素基施的条件试验
1271	Henan	2009-2010新乡平陵小麦氮素基施的条件试验
1272	Henan	2009-2010新乡平陵小麦氮素基施的条件试验
1273	Henan	2009-2010新乡平陵小麦氮素基施的条件试验
1274	Henan	2009-2010新乡平陵小麦氮素基施的条件试验
1275	Henan	2009-2010新乡平陵小麦氮素基施的条件试验
1276	Henan	2009-2010新乡平陵小麦氮素基施的条件试验
1277	Henan	2009-2010新乡平陵小麦氮素基施的条件试验
1278	Henan	2009-2010新乡平陵小麦氮素基施的条件试验
1279	Henan	2009-2010新乡平陵小麦氮素基施的条件试验
1280	Henan	2009-2010新乡平陵小麦氮素基施的条件试验
1281	Henan	2009-2010新乡平陵小麦氮素基施的条件试验
1282	Henan	2009-2010新乡平陵小麦氮素基施的条件试验
1283	Henan	2009-2010新乡平陵小麦氮素基施的条件试验
1284	Henan	2009-2010新乡平陵小麦氮素基施的条件试验
1285	Henan	2009-2010新乡平陵小麦氮素基施的条件试验
1286	Henan	2009-2010新乡平陵小麦氮素基施的条件试验
1287	Henan	2009-2010新乡平陵小麦氮素基施的条件试验		8285	4596	3689	44.5263
1288	Henan	2009-2010新乡平陵小麦氮素基施的条件试验		7957	4596	3361	42.2395
1289	Henan	2009-2010新乡平陵小麦氮素基施的条件试验		8121	4596	3525	43.406
1290	Henan	2009-2010新乡平陵小麦氮素基施的条件试验		8449	4596	3853	45.603
1291	Henan	2009-2010新乡平陵小麦氮素基施的条件试验
1292	Henan	2009-2010新乡平陵小麦氮素基施的条件试验
1293	Henan	2009-2010新乡平陵小麦氮素基施的条件试验
1294	Henan	2009-2010新乡平陵小麦氮素基施的条件试验
1295	Henan	2009-2010新乡平陵小麦氮素基施的条件试验		7961	4601	3360	42.2058
1296	Henan	2009-2010新乡平陵小麦氮素基施的条件试验		7646	4602	3044	39.8117
1297	Henan	2009-2010新乡平陵小麦氮素基施的条件试验		7804	4603	3201	41.0174
1298	Henan	2009-2010新乡平陵小麦氮素基施的条件试验		8119	4604	3515	43.2935
1299	Henan	2009-2010新乡平陵小麦氮素基施的条件试验
1300	Henan	2009-2010新乡平陵小麦氮素基施的条件试验
1301	Henan	2009-2010新乡平陵小麦氮素基施的条件试验
1302	Henan	2009-2010新乡平陵小麦氮素基施的条件试验
	Henan
	Henan
	Henan	高产冬小麦需肥规律研究
	Henan
	Henan
	Henan
	Henan
	Henan			8635.1	8170.5	464.6	5.38037		8635.1	7989.5	645.6	7.47646		8635.1	8509.7	125.4	1.45221
	Henan
	Henan
	Henan
	Henan								8575	8560	15	0.174927
	Henan
	Henan
	Henan
	Henan
	Henan			8715.2	7715.4	999.8	11.4719		8715.2	8510.5	204.7	2.34877		8715.2	7980.3	734.9	8.43239
	Henan
	Henan
	Henan
	Henan			8925	8055	870	9.7479		8925	8735	190	2.12885
	Henan
	Henan
	Henan
	Henan
	Henan			8929.7	8074.1	855.6	9.58151		8929.7	8330	599.7	6.71579		8929.7	8145	784.7	8.78753
	Henan
	Henan
	Henan
	Henan								8565	8230	335	3.91127
	Henan
	Henan
	Henan
	Henan
159	hebei	2002年辛集钾肥定位试验（冬小麦）
163	hebei	2002年辛集钾肥定位试验（冬小麦）												6845	6195	650	9.49598
167	hebei	2002年辛集钾肥定位试验（冬小麦）												6845	6195	650	9.49598
171	hebei	2002年辛集钾肥定位试验（冬小麦）
199	hebei	2003年辛集钾肥定位试验（冬小麦）
203	hebei	2003年辛集钾肥定位试验（冬小麦）												6465	6205	260	4.02166
207	hebei	2003年辛集钾肥定位试验（冬小麦）												6495	6205	290	4.46497
211	hebei	2003年辛集钾肥定位试验（冬小麦）
278	hebei	2004年辛集钾肥定位试验（冬小麦）
282	hebei	2004年辛集钾肥定位试验（冬小麦）												6525	5850	675	10.3448
286	hebei	2004年辛集钾肥定位试验（冬小麦）												6390	5850	540	8.4507
290	hebei	2004年辛集钾肥定位试验（冬小麦）
472	hebei	2007年河北辛集冬小麦养分限制因子研究试验		5500	3425	2075	37.7273
473	hebei	2007年河北辛集冬小麦养分限制因子研究试验		5550	4800	750	13.5135
474	hebei	2007年河北辛集冬小麦养分限制因子研究试验		7900	6075	1825	23.1013							7900	6825	1075	13.6076
475	hebei	2007年河北辛集冬小麦养分限制因子研究试验
476	hebei	2007年河北辛集冬小麦养分限制因子研究试验
477	hebei	2007年河北辛集冬小麦养分限制因子研究试验
478	hebei	2007年河北辛集冬小麦养分限制因子研究试验
479	hebei	2007年河北辛集冬小麦养分限制因子研究试验
480	hebei	2007年河北辛集冬小麦养分限制因子研究试验
481	hebei	2007年河北辛集冬小麦养分限制因子研究试验
482	hebei	2007年河北辛集冬小麦养分限制因子研究试验
483	hebei	2007年河北辛集冬小麦养分限制因子研究试验
484	hebei	2007年河北辛集冬小麦养分限制因子研究试验
485	hebei	2007年河北辛集冬小麦养分限制因子研究试验
486	hebei	2007年河北辛集冬小麦养分限制因子研究试验
487	hebei	2007年河北辛集冬小麦养分限制因子研究试验
488	hebei	2007年河北辛集冬小麦养分限制因子研究试验
489	hebei	2007年河北辛集冬小麦养分限制因子研究试验
495	hebei	2009年河北辛集冬小麦氮肥不同用量研究总结
501	hebei	2009年河北辛集冬小麦氮肥不同用量研究总结
[truncated: 2,604 more rows]
