# Supplementary material for: Agronomic Characteristics Related to Grain Yield and Nutrient Use Efficiency for Wheat Production in China
Source: PLoS One. 2016 Sep 15;11(9):e0162802. doi: 10.1371/journal.pone.0162802 (PMC5025147; doi:10.1371/journal.pone.0162802)
Supplement: S2 Fig — (XLSX) [file pone.0162802.s002.xlsx]

## Sheet: Fig.2 A
				最小值	280.5
				最大值	12000
				组间	11719.5
				分组数	6
				组间距	2343.9
									Mean yield	5950
				t/ha		No. of the observations	normdist		SD	1826.51
				0-2000	280.5	224	1.76651e-06	0.000176651			0.0297991
				2000-4000	2624.4	845	4.1632e-05	0.0041632			0.112412
				4000-6000	4968.3	2380	0.000189042	0.0189042			0.316616
				6000-8000	7312.2	3220	0.00016539	0.016539			0.428362
				8000-10000	9656.1	794	2.7879e-05	0.0027879			0.105627
				10000-12000	12000	54	9.05452e-07	9.05452e-05			0.00718372
						n=7517

## Sheet: Fig.2 B
	Fertilizer application rate
N	0-50	50-100	100-150	150-200	200-250	250-300	300-400	400-500	>500
No. of the observations	1012	378	499	2750	1746	454	384	72	22		7317
%	13.8308	5.16605	6.81973	37.5837	23.8622	6.20473	5.24805	0.98401	0.30067
	Fertilizer application rate
P2O5	0-50	50-100	100-150	150-200	200-250	250-300	300-400
No. of the observations	1025	2238	2340	1374	174	4	26				7181
%	14.2738	31.1656	32.586	19.1338	2.42306	0.0557025	0.362067
	Fertilizer application rate
K2O	0-50	50-100	100-150	150-200	200-250	250-300
No. of the observations	2027	1770	1269	1572	278	91					7007
%	28.9282	25.2605	18.1105	22.4347	3.96746	1.2987
