# Supplementary material for: Agronomic Characteristics Related to Grain Yield and Nutrient Use Efficiency for Wheat Production in China
Source: PLoS One. 2016 Sep 15;11(9):e0162802. doi: 10.1371/journal.pone.0162802 (PMC5025147; doi:10.1371/journal.pone.0162802)
Supplement: S2 Table — (XLSX) [file pone.0162802.s010.xlsx]

## Sheet: Sheet1
No.	data sources	Treatments		AEN	AEP	AEK	REN	REP	REK
1	Hebei
23	裴雪霞，王秀斌，何萍，张秀芝，李科江，周卫，梁国庆，金继运	氮肥后移对壤氮素供应和冬小麦氮素吸收利用的影响
24		N0
25		N300/2		1.71			22.3667
26		N210/2		1.9619			29.9048
27		N210/3		2.74286			36.6667
28		N210/4		1.59048			30.8095
152	henan
193	李丙奇，孙克刚，和爱玲，张欣	潮土区氮肥运筹对小麦产量和氮肥利用率的影响
194		T1
195		T2		3.64444			24.4889
196		T3		6.14667			29.6889
197		T4		11.4756			36.8
198		T5		9.10667			31.6
199		T6		13.3333			45.7222
200		T7		14.8556			47.2778
201	王桂良,黄玉芳,叶优良	不同钾肥品种和用量对小麦产量品质和养分吸收利用的影响
202	钾肥品种试验	0
203		俄罗斯产 KCl				8.37111			56.8444
204		罗布泊产 K2SO4				10.1178			60.1667
205		开封产 K2SO4				6.50111			57.4556
206		俄罗斯产 K2SO4				4.34778			60.7667
207		罗布泊产K2SO4							64.0444
208		罗布泊产				10.58			51.5259
209		罗布泊产K2SO4				5.62			43.8444
210		罗布泊产 K2SO4				3.21822			29.5556
211	王桂良 叶优良	超高产小麦干物质累积、氮素营养及诊断研究
212	温县	N0
213		N90		2.93			16.6667
214		N180		3.92			27.1111
215		N270		3.7			27.2593
216		N360		1.14			12.4722
217	兰考	N0
218		N90		2.81			22
219		N180		4.39			27.7222
220		N270		3.41			29.1852
221		N360		1.56			11.1389
222	温县	N0
223		N90		3.16			27.8889
224		N180		3.26			34.2778
225		N270		1.66			17.5926
226		N360		1.12			9.27778
227	兰考	N0
228		N90		1.7			33
229		N180		4.95			37.9444
230		N270		2.42			22.037
231		N360		1.02			11.0833
277	苗玉红 谭金芳	两个超高产小麦品种钾素营养差异性研究
278	温麦6号	钾水平0/mu
279		5				10.7366			54.688
280		10				6.831			44.305
281		15				5.8844			41.964
282		20				3.6123			19.3
283	兰考906-4	钾水平0
284		5				8.2			82.1
285		10				6.64			52.23
286		15				6.467			44.53
287		20				3.5756			39.37
294	逯怀森,董根中,肖伟强,卢浩坡,宁金星,尚巧平	施钾对旱地小麦养分变化的影响
295		基施75				5.56
296		基施150				3.8			3.1666
297		苗期75				6.6
298		拔节期75				2.84			1.0702
299		孕穗期75				7.22			6.9118
300		CK
301	赵鹏 陈阜	豫北秸秆还田配施氮肥对冬小麦氮利用及土壤硝态氮的短期效应
302		N0
303		N90		6.87778			40
304		N180		7.41111			33.3333
305		N270		6.36667			28.8889
306		N360		4.20556			23.3333
307		S+N0
308		S+N90		14.2222			43.3333
309		S+N180		11.8889			38.8889
310		S+N270		10.2037			38.1481
311		S+N360		6.85556			31.9444
351	郭天财,宋 晓,马冬云,冯 伟,王永华	施氮水平对2种穗型冬小麦品种产量及氮素吸收利用的影响
352		兰考矮早八
353				8.40222			56.7111
354				9.03278			42.3944
355				3.67361			25.2139
356
357		豫麦49-198
358				9.91556			53.0667
359				11.1439			47.8222
360				4.01194			27.7056
391	唐旭 马义兵	小麦-玉米轮作土壤磷素长期演变规律研究
392		郑州
393		1991-2005
394
395
396
397
398
399	Shanxi
400	李廷亮1，谢英荷	施肥和覆膜垄沟种植对旱地小麦产量及水氮利用的影响
401		旋地平作
402		旋地平作		1.59			4.44706
403		旋地平作		1.93			3.84242
404		旋地平作		2.33			7.92308
405		覆膜垄沟		2.51			6.91515
406	裴雪霞,王姣爱,党建友,张定一	小麦氮素吸收利用的基因型差异研究
407	品种试验	晋麦31
408		晋麦47
409		晋麦54
410		晋麦60
411		晋麦65
412		晋麦71
413		晋麦72
414		临丰615
415		临优145
416		临汾138
417		临汾5064
418		临选2039
419		临选2098
420		济南17
421		陕225
422		小偃54
423		晋麦31		1.02762			15.7778
424		晋麦47		4.57881			19.4667
425		晋麦54		3.48208			16.9778
426		晋麦60		5.10135			12.2222
427		晋麦65		0.862428			19.3333
428		晋麦71		7.54836			34.2667
429		晋麦72		3.38343			21.6889
430		临丰615		3.04329			38.0444
431		临优145		0.450096			13.9111
432		临汾138		1.02762			13.6889
433		临汾5064					6.71111
434		临选2039		4.88092			31.4222
435		临选2098		1.04046			18.3111
436		济南17		2.37611			12.4444
437		陕225		0.51201			3.55556
438		小偃54		2.87168			11.6
464	闫翠萍 裴雪霞 王姣爱杨峰曹勇张晶党建友	秸秆还田与施氮对冬小麦生长发育及水肥利用率的影响
465		S+N0(CK)
466		S+N5		23.6609			69.9867
467		S+N10		14.548			50.5
468		S+N15		11.7919			52.0844
469		S+N20		8.11137			39.5467
470		N0(CK)
471		N5		23.9769			70.7867
472		N10		14.5418			50.3333
473		N15		11.5484			45.5733
474		N20		9.01002			37.73
475	Shandong
476	石玉 2007年博士论文	不同类型小麦品质形成的生理机制及植株-土壤氮素循环研究
477		NPK
478		NPK
479		NPK
480		NPK
481		NPK
482		NPK
483		NPK
484		NPK
485		NPK
486		NPK
487		NPK
488		NPK
489		NPK
490		NPK
491		NPK
492	石玉 博士论文
493		N0
494		N180		7.80773			41.7778
495		N240		6.34648			33.2917
496		N360		4.19678			23.0833
497		N0
498		N180		5.42703			32.7222
499		N240		4.97895			30.0833
500		N360		3.26103			19.6389
501		N0
502		N180		9.88443			54.8333
503		N240		8.417			41.3333
504		N360		5.016			30.8889
505		N0
506		N180		6.0762			25.1111
507		N240		5.6544			19.7083
508		N360		4.29495			14.4722
543	晁赢，李旭花	长期定位施肥对土壤肥力特征及养分吸收利用的影响
544	定位试验	CK
545		N1P1K1+M1		18.7627
546		M2		18.5333
547		N2P2K2		17.2427
548		M3		8.26133
549		N3P3K3		9.13067
550	张法全 王小燕 于振文 王西芝 白洪立	公顷产10000 kg小麦氮素和干物质积累与分配特性
551	试验3	N0
552		N210		2.92552			11.2857
553		N240		4.176			16.3458
554		N270		6.27604			17.1185
555		N300		3.09097			14.7167
556		N330		1.97697			9.84242
557	试验1	N0
558		N180		3.43228			23
559		N240		4.95858			22.2083
560	试验2	N260		7.5295			35.0577
613	王旭清,王法宏,董玉红,任德昌,曹宏鑫
614	95(6)161	施肥					23.1
616		施肥					20.5
618	烟农19	施肥					21.6
620		施肥					19
686	Quanxiao Fang, Qiang Yu, Enli Wang, Yuhai Chen, Guoliang Zhang, Jing Wang ,Longhui Li	Plant Soil ,2006,284:335–350
687
688				12			43.2
689				5.5			43.85
690				4.33333			33
698	Shaanxi
730	王荣辉1,2,王朝辉1,李生秀	施磷量对旱地小麦氮磷钾和干物质积累及产量的影响
731		P0
732		P50			11.52			27.0338
733		P100			9.97			24.5137
734		P150			5.54667			15.4261
735	何晓雁1郝明德1, 2*李慧成2蔡志风3	黄土高原旱地小麦施肥对产量及水肥利用效率的影响
736		CK
737		N		2.84			12
738		M
739		NP					46.75
740		NM					54.56
741		NPM					67.03
742	杨晓1，郝明德2*，李芳林1	黄土区长期施肥对小麦产量和养分吸收的影响
743		CK
744		P
745		N		5.08671			23.8
746		NP					80.8
747		M					24.5
748		PM					23.6
749		NM					33.6
750		NPM					36
760	赵新春,王朝辉	半干旱黄土区不同施氮水平冬小麦产量形成与氮素利用
761		N0
762		N80		32.75
763		N160		18.6875			77.25
764		N240		15.4583			60.7917
765	赵新春,王朝辉	小麦的氮效率及施氮对小麦氮磷钾吸收与转运的影响
766		N0
767		N80					36.25
768		N160		21.3125			38.9375
769		N240		14.4167			31.5833
770	段敏,同延安,魏样	不同施肥条件下冬小麦氮素吸收、转运及累积的研究
771		CK
772		FP
773		N150P150K75
774		N225P120K120
775		N270P150K150
776		N300P120K120
777	段敏，同延安	2010年硕士学位论文
778		CK
779		FP		6.11			12.3
780		NP					18.7
781		NK					12.2
782		PK
783		NPK		8.43609	8.88321	3.58447	35.3
807	党廷辉,郝明德,郭胜利,蔡贵信	旱地小麦施氮和地膜栽培的氮素效应与淋溶
808		CK
809		N1		12.116			51.91
810		N2		6.392			26.6
811		N1F		10.1613			38.4867
812	常规栽培(行距20 cm)	W		9.55333			29.4867
813	膜际栽培(覆膜宽30 cm,膜间距60 cm,膜间种植4行,行距15cm)	WM1		11.918			27.0467
814	膜下栽培(覆膜宽60 cm,膜间距30cm,膜上种植4行,行距15 cm)	WM2		8.13533			18.5267
815	少耕留高茬覆盖(休闲期免耕高留茬,并麦杆覆盖,行距20	WT		9.814			29.22
816	赵新春,王朝辉	半干旱黄土区不同施氮水平冬小麦产量形成与氮素利用
817		0
818		80		32.75
819		160		18.6875			77.25
820		240		15.4583			60.7917
854	王旭刚1,郝明德2,李建民1,张春霞2	氮磷配施对旱地小麦产量和吸肥特性的影响。
855		1
856		2
857		3
858		4					69.4333
859		5			7.46905			11.7303
860		6			4.3669		88.2444	7.5827
861		7					23.2611
862		8			36.84		86.66	39.59
863		9			18.8704		75.9389	25.8015
864	孙春梅 李生秀	不同基因型冬小麦的水氮利用效率研究
865	施氮	西杂1号		23.1			29.7333
866		西农1376(父）		12.21			44.025
867		陕150		22.77			52.4583
868		小僵6号		24.5			63.2083
869		西农2611		16.38			66.6417
870		西农1376(母）		19.83			58.175
871		陕160		17.12			66.6833
872		阎麦8911		14.03			43.9667
873		矮丰3号		19.51			82.6583
874		陕229		15.42			47.625
875	不施氮	西杂1号
876		西农1376(父）
877		陕150
878		小僵6号
879		西农2611
880		西农1376(母）
881		陕160
882		阎麦8911
883		矮丰3号
884		陕229
885	翟军海 周建斌	不同水肥调控措施对小麦养分吸收的效应及其机理研究
886		CK
887	灌水40mm	I
888		N		1.67			29.17
889		M
890		IN		4.86			41.86
891		IM
892		NM		2.14			32.07
893		INM		6.14			48.05
894	徐福利 李生秀	氮素施用技术与不同保墒耕作施肥对土壤水肥因子及小麦产量的影响
895	地块1 1A	秋季施氮0
896	1B	0					40
897	1C	0					21
898	1D	0					14.3
899	2A	50					13
900	2B	50					14
901	2C	50					15.6
902	2D	50					10
903	3A	100					13
904	3B	100					16.3
905	3C	100					14.8
906	3D	100					11
907	4A	150					10.7
908	4B	150					12.8
909	4C	150					13.2
910	4D	150					14.2
911	5A	200					9.3
912	5B	200					6.8
913	5C	200					11.3
914	5D	200					9.1
975	党廷辉,郝明德	黄土塬区不同水分条件下冬小麦氮肥效应与土壤氮素调节
976	1996-1998年平均	0
977		45					42.9
978		90					38.6
979		135					38.2
980		180					25.4
981	同延安赵营赵护兵 樊红柱	施氮量对冬小麦氮素吸收、转运及产量的影响
982
983				8.62857			38.2857
984				6.18571			37.8571
985				4.03175			34.1905
986	王 兵 王朝辉	氮肥用量和栽培模式对西北旱地冬小麦生长和养分利用的影响
987
988				25.0083
989				10.0792			61.125
1007	唐旭 马义兵	小麦-玉米轮作土壤磷素长期演变规律研究
1008		杨陵
1009		1991-2005
1010
1011
1012
1013
1014
1015	Jiangsu
1016	通州十总小麦测土配方施肥示范简报
1017	刁锡华	PK
1018		NPK（配方）		15.0794			51.2
1019		常规		11.9871			33.9
1020	刁锡明	PK
1021		NPK（配方）		19.2821			54.4
1022		常规		14.5395			35.9
1023	喻凤生	PK
1024		NPK（配方）		15.2632			39.1
1025		常规		13.4109			31.9
1041	林忠成	太湖地区土壤-作物系统氮素利用的综合研究
1042	2008	N0
1043		N1		27.06			52.3
1044		N2		19.07			48.39
1045		N3		17.37			47.55
1046		N4		12.95			43.19
1047		N5		10.51			38.05
1048	2009	N00
1049		N11		37.75			81.13
1050		N22		31.18			72.24
1051		N33		22.32			62.11
1052		N44		17.56			54.19
1053		N55		14.48			49.48
1054		N01		28.95			57.63
1055		N02		24.91			63.89
1056		N03		18.85			55.54
1057		N04		15.91			52.99
1058		N05		13.75			50.23
1094	朱秀英 周马康 崔春梅 孙晓荣	小麦精确施氮对产量和氮肥利用率的影响
1095		N 0
1096		N 1		7.86429			43.07
1097		N 2		4.66364			31.81
1115	周正权 郭文善	氮肥运筹对扬麦10号产量品质及其氮肥利用率的影响
1116		基施氮量0
1117		0		14.8183			45.07
1118		0		16.6917			42.93
1119		0		14.4111			41.87
1120		60		12.7817			36.91
1121		60		18.3592			45.32
1122		60		18.3394			43.58
1123		60		16.9175			42.48
1124		120		12.565			39.88
1125		120		19.7694			45.84
1126		120		21.0554			44.99
1127		120		13.8197			39.08
1128		180		12.7967			37.11
1129		180		16.0288			41.09
1130		180		9.866			31.26
1131		180		7.874			20.85
1132	葛鑫 戴其根	淮北地区不同类型小麦氮肥施用技术的研究
1133	陕农229	0
1134		65.6		20.5686			51.8
1135		131.3		19.9261			50.7
1136		196.9		18.9746			49.2
1137		262.5		15.5196			48.4
1138		328.1		10.6556			38.9
1139		393.8		5.01778			34.5
1140	济南17	0
1141		65.6		18.3765			54.2
1142		131.3		16.5149			52.9
1143		196.9		16.1447			50.4
1144		262.5		14.021			49.7
1145		328.1		12.6047			49.7
1146		393.8		4.63865			43.3
1147	陕农229	基追比10:0		11.1326			28.2
1148		9:1		12.3025			31.6
1149		8:2		13.4834			38.5
1150		7:3		14.131			43.3
1151		6:4		14.6389			46.6
1152		5:5		15.5196			48.4
1153		4:6		14.7596			47.5
1154		3:7		13.8937			45.6
1155	济南17	基追比10:0		11.416			31
1156		9:1		12.0971			32.9
1157		8:2		12.3512			38.3
1158		7:3		12.7596			42.1
1159		6:4		13.3589			47.1
1160		5:5		14.021			49.7
1161		4:6		13.5192			50.5
1162		3:7		12.893			49.8
1163	追氮时期	5(基):5(拔)		14.021			49.7
1164		5(基):2.5(拔):2.5(花)		12.7634			46.6
1165		5(基):5(花)		10.5227			41.8
1181	谢学俭 沈其荣	苏南稻麦轮作农田系统土壤中磷氮的流失
1182		P0
1183		P20
1184		P40			17.625			57.5041
1185		P80			8.8125			30.8999
1186		P160			4.40625			15.1636
1187	杨勇 郭文善	晚播小麦高产优质栽培机理与技术研究
1188	播期10.30密度180	3:3.5:3.5
1189	180	5:2.5:2.5
1190	180	7:1.5:1.5
1191	360	3:3.5:3.5
1192	360	5;2.5:2.5
1193	360	7:1.5:1.5
1194	播期11.19密度180	3:3.5:3.5
1195	180	5:2.5:2.5
1196	180	7:1.5:1.5
1197	360	3:3.5:3.5
1198	360	5;2.5:2.5
1199	360	7:1.5:1.5
1200		膜侧沟播
1201		覆膜穴播
1202		露地高密
1203		露地低密
1204	王小军 张洪程	不同土壤肥力配方施肥对淮南小麦产量、品质及肥料吸收利用率的影响
1205	高肥力田扬麦11	N0P0K0
1206		N0P2K2
1207		N1P2K2		10.5585			42.3077
1208		N2P0K2
1209		N2P1K2			4.56
1210		N2P2K2		12.7385	8.7275	6.19667	38.6923		62.1667
1211		N2P3K2
1212		N2P2K0
1213		N2P2K1				7.33333			65.6667
1214		N2P2K3							15.4444
1215		N3P2K2		5.24923			18.2564
1216		N1P1K2
1217		N1P2K1
1218		N2P1K1
1219		N1.5P2K2		8.03692			33.1282
1220		N2.5P2K2		7.472			28.4308
1221	高肥力田扬麦15	N0P0K0
1222		N0P2K2
1223		N1P2K2		32.5923			65.3846
1224		N2P0K2
1225		N2P1K2			4.74			36.656
1226		N2P2K2		19.94	10.26	5.09667	49.6154		55.1667
1227		N2P3K2			0.701667			13.746
1228		N2P2K0
1229		N2P2K1				6.75333			31
1230		N2P2K3							24.7778
1231		N3P2K2		12.0374			29.641
1232		N1P1K2
1233		N1P2K1
1234		N2P1K1
1235		N1.5P2K2		22.3979			45.4359
1236		N2.5P2K2		14.9698			37.4154
1237	中肥力田扬麦11	N0P0K0
1238		N0P2K2
1239		N1P2K2		28.3723			63.0769
1240		N2P0K2
1241		N2P1K2			10.505
1242		N2P2K2		22.83	15.25	9.795	59.7692		81.1667
1243		N2P3K2			1.47167			42.7653
1244		N2P2K0
1245		N2P2K1				13.4267			61
1246		N2P2K3							26.4444
1247		N3P2K2		12.4969			35.8974
1248		N1P1K2
1249		N1P2K1
1250		N2P1K1
1251		N1.5P2K2		20.0779			65.0256
1252		N2.5P2K2		18.4929			48.4923
1253	中肥力田扬麦15	N0P0K0
1254		N0P2K2
1255		N1P2K2		24.1292			55.2308
1256		N2P0K2
1257		N2P1K2			2.45			29.783
1258		N2P2K2		17.1915	5.385	2.91833	55.2308		73.6667
1259		N2P3K2			1
1260		N2P2K0
1261		N2P2K1				3.06667
1262		N2P2K3				0.563333			33.2222
1263		N3P2K2		12.5897			36.8205
1264		N1P1K2
1265		N1P2K1
1266		N2P1K1
1267		N1.5P2K2		17.8195			55.0769
1268		N2.5P2K2		15.4302			44.6769
1269	低肥力扬麦11	N0P0K0
1270		N0P2K2
1271		N1P2K2		18.08			42.6154
1272		N2P0K2
1273		N2P1K2			4.31			40.0925
1274		N2P2K2		18.56	10.06		54.7692	52.1203	39.6667
1275		N2P3K2			7.68833			44.2927
1276		N2P2K0
1277		N2P2K1				0.49			42.33
1278		N2P2K3				0.93			31.33
1279		N3P2K2		13.4097			38.8205
1280		N1P1K2
1281		N1P2K1
1282		N2P1K1
1283		N1.5P2K2		21.0872			50.7692
1284		N2.5P2K2		15.7502			45.9077
1285	低肥力田扬麦15	N0P0K0
1286		N0P2K2
1287		N1P2K2		19.7785			44.6154
1288		N2P0K2
1289		N2P1K2			21.655			28.6375
1290		N2P2K2		19.8785	15.02	5.83333	57.3077		50.3333
1291		N2P3K2			11.5533
1292		N2P2K0
1293		N2P2K1				9.6			61
1294		N2P2K3				4.51889			47.3333
1295		N3P2K2		15.961			41.1795
1296		N1P1K2
1297		N1P2K1
1298		N2P1K1
1299		N1.5P2K2		18.759			48.5128
1300		N2.5P2K2		18.2855			47.7538
1301	朱秀英 周马康 崔春梅 孙晓荣	小麦精确施氮对产量和氮肥利用率的影响
1302
1303				7.86429			43.0714
1304				4.66364			31.8182
1420	黄严帅 张洪程	氮肥用量和运筹对不同类型专用小麦产量形成及氮素吸收利用的影响
1421	高邮地点 扬麦11	2001-2002
1422				25.76			52.35
1423				17.4667			51.06
1424				13.0578			51.04
1425				11.3133			46.78
1426				8.05867			43.19
1427				6.15111			38.38
1428	扬州地点	2001-2002
1429				27.0133			55.13
1430				17.8			51.63
1431				15.7956			51.54
1432				13.22			50.99
1433				8.69333			44.82
1434				6.36444			38.94
1435	高邮 宁麦9号	2001-2002
1436				21.92			51.37
1437				14.9333			47.74
1438				13.5733			46.69
1439				12.0067			45.46
1440				9.21067			43.88
1441				6.37333			39.38
1442	扬州地点	2001-2002
1443				17.84			52.15
1444				18.5333			50.13
1445				16.2933			49.94
1446				14.08			49.12
1447				9.472			45.46
1448				7.58667			40.92
1449	高邮 扬麦11	基追比10:0		8.24			25.41
1450		9:1		9.34			28.97
1451		8:2		10.2867			32.54
1452		7:3		11.1467			40.7
1453		6:4		12.0533			48.17
1454		5:5		11.3133			46.78
1455		4:6		10.5333			44.76
1456		3:7		9.76			44.03
1457	扬州地点	基追比10:0		11.04			28.98
1458		9:1		11.8933			35.19
1459		8:2		12.7133			40.12
1460		7:3		13.06			43.44
1461		6:4		14.32			48.72
1462		5:5		13.22			50.99
1463		4:6		11.7867			47.57
1464		3:7		10.16			46.92
1465	高邮 宁麦9号	基追比10:0		9.98			26.42
1466		9:1		10.7267			30.48
1467		8:2		11.5733			35.89
1468		7:3		11.78			41.63
1469		6:4		12.6667			47.63
1470		5:5		12.0067			45.46
1471		4:6		10.92			43.53
1472		3:7		10.5067			43.22
1473	扬州地点	基追比10:0		13.4933			25.43
1474		9:1		11.92			31.94
1475		8:2		12.2867			36.58
1476		7:3		13.08			43.1
1477		6:4		15.4467			46.74
1478		5:5		14.08			49.12
1479		4:6		12.12			48.42
1480		3:7		11.6267			44.1
1591
1644	Beijing
1645	巨晓棠,潘家荣,刘学军,等	高肥力土壤冬小麦生长季肥料氮的去向研究Ⅰ.冬小麦生长季肥料氮去向
1646		0
1647		120		12.2083
1648		240		2.24167
1649		360		2.07778
1650	刘学军,赵紫娟,巨晓棠,张福锁	基施氮肥对冬小麦产量、氮肥利用率及氮平衡的影响
1651		N0
1652		N75		2.88			16
1653		N112.5		1.62667			14.5
1654		N150		1.55333			13.5
1667	唐旭 马义兵	小麦-玉米轮作土壤磷素长期演变规律研究
1668		昌平
1669		1991-2005
1670
1671
1672
1673
1674
1675	Ningxia
1681	张爱平,刘汝亮,李友宏,杨世琦,杨淑静,杨正礼	施用磷肥对春小麦产量与吸氮特性及土体中硝态氮累积的影响
1682		P0
1683		P60			10.4167			10
1684		P120			5.25833			7
1685		P180			2.32778			6.2
1700	Gansu	春小麦
1712	沈新磊,黄思光,王 俊,凌 莉,李世清,李凤民	半干旱农田生态系统地膜覆盖模式和施氮对小麦产量和氮效率的效应
1713	1999底墒L	M0
1714	春小麦			8.4			30.4
1715		M30
1716				5.7			30.3
1717		M60
1718				2.2			19
1719		Mw
1720				6.3			19.6
1721	底墒H	M0
1722				3.1			10.2
1723		M30
1724				12.2			32.7
1725		M60
1726				6			34.2
1727		Mw
1728				6.6			38.9
1729	2000底墒L	M0
1730				9.78227			18.83
1731		M30
1732				10.7913			4.44
1733		M60
1734				1.25133
1735		Mw
1736							8.9
1737	底墒H	M0
1738							19.7
1739		M30
1740				4.44373
1741		M60
1742				4.13253
1743		Mw
1744				9.28653
1745	覆膜	M0
1746				1.14222			6.1
1747		M75
1748				3.20444			9.5
1749		M150
1750				0.813333			3.6
1751		Mw
1752				0.142222			2.2
1753	李文学 张福锁	小麦/玉米/蚕豆间作系统中氮、磷吸收利用特点及其环境效应
1754	不施磷P0	N0
1755		N100
1756		N200
1757		N300
1758		N400
1759		N0
1760		N100
1761		N200
1762		N300
1763		N400
1764	施磷P75	N0
1765		N100
1766		N200
1767		N300
1768		N400
1769		N0
1770		N100
1771		N200
1772		N300
1773		N400
1806	重庆市
1812	熊明彪 宋光煜	长期施肥条件下紫色土-小麦系统中钾素利用的研究
1813		CK
1814		N		0.229333
1815		NP
1816		NK
1817		M
1818		NPK			13.324	12.5587			52.6667
1819		MNPK
1832	田秀英 石孝军	定位施肥对稻麦产量和紫色土肥力的影响研究
1833		CK
1834		N
1835		NP
1836		NK
1837		PK
1838		NPK		10.0021	21.5992	7.63006	62.5		38.0333
1839		M1
1840		Ml+NPK
1841	稻油	M1+(NPK)cl
1842		M1+(NPK)H
1843		M2+NPK
1844	四川省
1889	新疆 乌鲁木齐
1890	唐旭 马义兵	小麦-玉米轮作土壤磷素长期演变规律研究
1891		乌鲁木齐
1892	15年均值	1990-2004
1893
1894	每年施入的氮相等，由秸秆和农家肥量确定
1895
1896
1897
1898	Hunan
1899	唐旭 马义兵	小麦-玉米轮作土壤磷素长期演变规律研究
1900		祁阳
1901		1991-2005
1902
1903
1904
1905
1906
1	Shanxi	1997年小麦山西临汾市乔李镇南麻村石灰性褐土钾肥长期定位试验
5	Shanxi	1997年小麦山西临汾市乔李镇南麻村石灰性褐土钾肥长期定位试验							10.2903
9	Shanxi	1997年小麦山西临汾市乔李镇南麻村石灰性褐土钾肥长期定位试验
13	Shanxi	1997年小麦山西临汾市乔李镇南麻村石灰性褐土钾肥长期定位试验				7.70667			17.507
17	Shanxi	1993年小麦山西临汾市乔李镇南麻村石灰性褐土钾肥长期定位试验
21	Shanxi	1993年小麦山西临汾市乔李镇南麻村石灰性褐土钾肥长期定位试验				0.3			7.71062
25	Shanxi	1993年小麦山西临汾市乔李镇南麻村石灰性褐土钾肥长期定位试验
29	Shanxi	1993年小麦山西临汾市乔李镇南麻村石灰性褐土钾肥长期定位试验				1.5			6.86547
33	Shanxi	1994年小麦山西临汾市乔李镇南麻村石灰性褐土钾肥长期定位试验
37	Shanxi	1994年小麦山西临汾市乔李镇南麻村石灰性褐土钾肥长期定位试验				2.70667			2.26318
41	Shanxi	1994年小麦山西临汾市乔李镇南麻村石灰性褐土钾肥长期定位试验
45	Shanxi	1994年小麦山西临汾市乔李镇南麻村石灰性褐土钾肥长期定位试验				3.50667			6.0925
49	Shanxi	1995年小麦山西临汾市乔李镇南麻村石灰性褐土钾肥长期定位试验
53	Shanxi	1995年小麦山西临汾市乔李镇南麻村石灰性褐土钾肥长期定位试验				0.5			8.11556
57	Shanxi	1995年小麦山西临汾市乔李镇南麻村石灰性褐土钾肥长期定位试验
61	Shanxi	1995年小麦山西临汾市乔李镇南麻村石灰性褐土钾肥长期定位试验				8.51333			1.93831
65	Shanxi	1996年小麦山西临汾市乔李镇南麻村石灰性褐土钾肥长期定位试验
69	Shanxi	1996年小麦山西临汾市乔李镇南麻村石灰性褐土钾肥长期定位试验				6.20667			16.3764
73	Shanxi	1996年小麦山西临汾市乔李镇南麻村石灰性褐土钾肥长期定位试验
77	Shanxi	1996年小麦山西临汾市乔李镇南麻村石灰性褐土钾肥长期定位试验				10.9067
81	Shanxi	1998年小麦山西临汾市乔李镇南麻村石灰性褐土钾肥长期定位试验
85	Shanxi	1998年小麦山西临汾市乔李镇南麻村石灰性褐土钾肥长期定位试验				4			7.39989
89	Shanxi	1998年小麦山西临汾市乔李镇南麻村石灰性褐土钾肥长期定位试验
97	Shanxi	1999年小麦山西临汾市乔李镇南麻村石灰性褐土钾肥长期定位试验
101	Shanxi	1999年小麦山西临汾市乔李镇南麻村石灰性褐土钾肥长期定位试验				4.70667			19.0491
105	Shanxi	1999年小麦山西临汾市乔李镇南麻村石灰性褐土钾肥长期定位试验
109	Shanxi	1999年小麦山西临汾市乔李镇南麻村石灰性褐土钾肥长期定位试验				7.20667			28.0551
128	Shanxi	2000年小麦山西临汾市乔李镇南麻村钾肥长期定位试验
132	Shanxi	2000年小麦山西临汾市乔李镇南麻村钾肥长期定位试验				8.61333			9.22631
136	Shanxi	2000年小麦山西临汾市乔李镇南麻村钾肥长期定位试验
140	Shanxi	2000年小麦山西临汾市乔李镇南麻村钾肥长期定位试验				7.40667			7.91807
144	Shanxi	2001年小麦山西临汾市乔李镇南麻村钾肥长期定位试验
148	Shanxi	2001年小麦山西临汾市乔李镇南麻村钾肥长期定位试验				8.00667			10.7658
152	Shanxi	2001年小麦山西临汾市乔李镇南麻村钾肥长期定位试验
156	Shanxi	2001年小麦山西临汾市乔李镇南麻村钾肥长期定位试验				4.8			6.67111
	Shanxi
1	Shanxi	2004年小麦山西临汾市乔李镇南麻村养分缺素试验		15.5111	2.48	1.24	44.5342	5.24311	9.37743
5	Shanxi	2004年小麦山西临汾市乔李镇南麻村养分缺素试验
9	Shanxi	2004年小麦山西临汾市乔李镇南麻村养分缺素试验
13	Shanxi	2004年小麦山西临汾市乔李镇南麻村养分缺素试验
17	Shanxi	2004年小麦山西临汾市乔李镇南麻村养分缺素试验
21	Shanxi	2004年小麦山西临汾市乔李镇南麻村养分缺素试验
25	Shanxi	2005年小麦山西临汾市乔李南麻村养分缺素试验		5.14444	8.70667		26.1668	9.46153	23.7365
29	Shanxi	2005年小麦山西临汾市乔李南麻村养分缺素试验
33	Shanxi	2005年小麦山西临汾市乔李南麻村养分缺素试验
37	Shanxi	2005年小麦山西临汾市乔李南麻村养分缺素试验
41	Shanxi	2005年小麦山西临汾市乔李南麻村养分缺素试验
45	Shanxi	2005年小麦山西临汾市乔李南麻村养分缺素试验
49	Shanxi	2003年小麦山西临汾市乔李镇南麻村养分缺素试验		8.43333	10.3667	7.65333	38.2377	11.9824	23.1222
53	Shanxi	2003年小麦山西临汾市乔李镇南麻村养分缺素试验
57	Shanxi	2003年小麦山西临汾市乔李镇南麻村养分缺素试验
61	Shanxi	2003年小麦山西临汾市乔李镇南麻村养分缺素试验
65	Shanxi	2003年小麦山西临汾市乔李镇南麻村养分缺素试验
69	Shanxi	2003年小麦山西临汾市乔李镇南麻村养分缺素试验
73	Shanxi	2002年小麦山西临汾乔李镇南麻村钾肥长期定位试验
77	Shanxi	2002年小麦山西临汾乔李镇南麻村钾肥长期定位试验				3.00667			16.183
81	Shanxi	2002年小麦山西临汾乔李镇南麻村钾肥长期定位试验
85	Shanxi	2002年小麦山西临汾乔李镇南麻村钾肥长期定位试验				8.01333			14.954
109	Shanxi	2004年小麦山西临汾市乔李镇南麻村石灰性褐土钾肥长期定位试验
113	Shanxi	2004年小麦山西临汾市乔李镇南麻村石灰性褐土钾肥长期定位试验				2.6			14.629
117	Shanxi	2004年小麦山西临汾市乔李镇南麻村石灰性褐土钾肥长期定位试验
121	Shanxi	2004年小麦山西临汾市乔李镇南麻村石灰性褐土钾肥长期定位试验				6			18.1949
125	Shanxi	2003年小麦山西临汾乔李镇南麻村钾肥长期定位试验
129	Shanxi	2003年小麦山西临汾乔李镇南麻村钾肥长期定位试验				1.16			22.1061
133	Shanxi	2003年小麦山西临汾乔李镇南麻村钾肥长期定位试验
137	Shanxi	2003年小麦山西临汾乔李镇南麻村钾肥长期定位试验				5.96			27.706
143	Shanxi	2003年小麦山西临汾市乔李镇南麻村磷钾肥肥效试验
147	Shanxi	2003年小麦山西临汾市乔李镇南麻村磷钾肥肥效试验				6			20.3963
151	Shanxi	2003年小麦山西临汾市乔李镇南麻村磷钾肥肥效试验				6.2			16.1448
155	Shanxi	2003年小麦山西临汾市乔李镇南麻村磷钾肥肥效试验				2.1			41.0854
159	Shanxi	2003年小麦山西临汾市乔李镇南麻村磷钾肥肥效试验
163	Shanxi	2003年小麦山西临汾市乔李镇南麻村磷钾肥肥效试验
167	Shanxi	2005年小麦山西临汾乔李镇南麻村钾肥长期定位试验
171	Shanxi	2005年小麦山西临汾乔李镇南麻村钾肥长期定位试验				3.24667			13.1477
175	Shanxi	2005年小麦山西临汾乔李镇南麻村钾肥长期定位试验				4.62667			29.6192
179	Shanxi	2005年小麦山西临汾乔李镇南麻村钾肥长期定位试验
195	Shanxi	2007年冬小麦不同品种钾肥（硫酸钾、氯化钾）对产量和品质的影响02
199	Shanxi	2007年冬小麦不同品种钾肥（硫酸钾、氯化钾）对产量和品质的影响02				9.99333			12.1835
203	Shanxi	2007年冬小麦不同品种钾肥（硫酸钾、氯化钾）对产量和品质的影响02				3.49333			0.763283
207	Shanxi	2007年冬小麦不同品种钾肥（硫酸钾、氯化钾）对产量和品质的影响01
211	Shanxi	2007年冬小麦不同品种钾肥（硫酸钾、氯化钾）对产量和品质的影响01				0.64			14.4128
215	Shanxi	2007年冬小麦不同品种钾肥（硫酸钾、氯化钾）对产量和品质的影响01				1.99333			20.7488
219	Shanxi	2007年冬小麦养分限制因子研究		4.54359	5.07778	0.486667	33.2576	8.50701	15.8194
223	Shanxi	2007年冬小麦养分限制因子研究
227	Shanxi	2007年冬小麦养分限制因子研究
231	Shanxi	2007年冬小麦养分限制因子研究
239	Shanxi	2007年冬小麦养分限制因子研究
251	Shanxi	2007年冬小麦养分限制因子研究
255	Shanxi	2007年冬小麦－夏玉米轮作条件下养分限制因子研究（小麦）		24.2	11.52	3.46	64.1901	11.9796	9.63404
259	Shanxi	2007年冬小麦－夏玉米轮作条件下养分限制因子研究（小麦）
263	Shanxi	2007年冬小麦－夏玉米轮作条件下养分限制因子研究（小麦）
267	Shanxi	2007年冬小麦－夏玉米轮作条件下养分限制因子研究（小麦）
271	Shanxi	2007年冬小麦－夏玉米轮作条件下养分限制因子研究（小麦）
275	Shanxi	2007年冬小麦－夏玉米轮作条件下养分限制因子研究（小麦）
279	Shanxi	2007年冬小麦－夏玉米长期施用钾肥下钾素循环与调控（小麦）
283	Shanxi	2007年冬小麦－夏玉米长期施用钾肥下钾素循环与调控（小麦）				4.16667			7.68834
287	Shanxi	2007年冬小麦－夏玉米长期施用钾肥下钾素循环与调控（小麦）
291	Shanxi	2007年冬小麦－夏玉米长期施用钾肥下钾素循环与调控（小麦）				5.57333			7.28648
295	Shanxi	2008年山西省冬小麦－夏玉米轮作条件下不同施氮肥方式对作物产量、品质及环境的影响01
296	Shanxi	2008年山西省冬小麦－夏玉米轮作条件下不同施氮肥方式对作物产量、品质及环境的影响01
297	Shanxi	2008年山西省冬小麦－夏玉米轮作条件下不同施氮肥方式对作物产量、品质及环境的影响01
298	Shanxi	2008年山西省冬小麦－夏玉米轮作条件下不同施氮肥方式对作物产量、品质及环境的影响01		14.5027			41.244
299	Shanxi	2008年山西省冬小麦－夏玉米轮作条件下不同施氮肥方式对作物产量、品质及环境的影响01		16.0024			62.4701
300	Shanxi	2008年山西省冬小麦－夏玉米轮作条件下不同施氮肥方式对作物产量、品质及环境的影响01		11.6704			50.2929
301	Shanxi	2008年山西省冬小麦－夏玉米轮作条件下不同施氮肥方式对作物产量、品质及环境的影响01		13.8795			43.3159
302	Shanxi	2008年山西省冬小麦－夏玉米轮作条件下不同施氮肥方式对作物产量、品质及环境的影响01		13.8795			50.3828
303	Shanxi	2008年山西省冬小麦－夏玉米轮作条件下不同施氮肥方式对作物产量、品质及环境的影响01		17.2893			60.8306
304	Shanxi	2008年山西省冬小麦－夏玉米轮作条件下不同施氮肥方式对作物产量、品质及环境的影响01		16.4736			58.026
305	Shanxi	2008年山西省冬小麦－夏玉米轮作条件下不同施氮肥方式对作物产量、品质及环境的影响01		14.0923			51.8727
306	Shanxi	2008年山西省冬小麦－夏玉米轮作条件下不同施氮肥方式对作物产量、品质及环境的影响01		16.2051			56.6679
307	Shanxi	2008年山西省冬小麦－夏玉米轮作条件下不同施氮肥方式对作物产量、品质及环境的影响01		16.4989			44.0189
308	Shanxi	2008年山西省冬小麦－夏玉米轮作条件下不同施氮肥方式对作物产量、品质及环境的影响01		17.5731			64.6044
309	Shanxi	2008年山西省冬小麦－夏玉米轮作条件下不同施氮肥方式对作物产量、品质及环境的影响01		15.744			58.9204
310	Shanxi	2008年山西省冬小麦－夏玉米轮作条件下不同施氮肥方式对作物产量、品质及环境的影响01		14.9739			54.4348
311	Shanxi	2008年山西省冬小麦－夏玉米轮作条件下不同施氮肥方式对作物产量、品质及环境的影响01		17.9632			64.2578
312	Shanxi	2008年山西省冬小麦－夏玉米轮作条件下不同施氮肥方式对作物产量、品质及环境的影响01		18.4597			65.3593
313	Shanxi	2008年山西省冬小麦－夏玉米轮作条件下不同施氮肥方式对作物产量、品质及环境的影响01
314	Shanxi	2008年山西省冬小麦－夏玉米轮作条件下不同施氮肥方式对作物产量、品质及环境的影响01
315	Shanxi	2008年山西省冬小麦－夏玉米轮作条件下不同施氮肥方式对作物产量、品质及环境的影响01
316	Shanxi	2009年山西省冬小麦不同施氮量及氮肥分配方式对作物产量及环境的影响(试验1)
317	Shanxi	2009年山西省冬小麦不同施氮量及氮肥分配方式对作物产量及环境的影响(试验1)
318	Shanxi	2009年山西省冬小麦不同施氮量及氮肥分配方式对作物产量及环境的影响(试验1)
319	Shanxi	2009年山西省冬小麦不同施氮量及氮肥分配方式对作物产量及环境的影响(试验1)
320	Shanxi	2009年山西省冬小麦不同施氮量及氮肥分配方式对作物产量及环境的影响(试验1)		4.24167			22.5135
321	Shanxi	2009年山西省冬小麦不同施氮量及氮肥分配方式对作物产量及环境的影响(试验1)		6.19867			46.2567
322	Shanxi	2009年山西省冬小麦不同施氮量及氮肥分配方式对作物产量及环境的影响(试验1)		8.45967			21.7718
323	Shanxi	2009年山西省冬小麦不同施氮量及氮肥分配方式对作物产量及环境的影响(试验1)					2.93667
324	Shanxi	2009年山西省冬小麦不同施氮量及氮肥分配方式对作物产量及环境的影响(试验1)		9.66383			31.5763
325	Shanxi	2009年山西省冬小麦不同施氮量及氮肥分配方式对作物产量及环境的影响(试验1)		6.91833			18.3388
326	Shanxi	2009年山西省冬小麦不同施氮量及氮肥分配方式对作物产量及环境的影响(试验1)		9.41683			36.3115
327	Shanxi	2009年山西省冬小麦不同施氮量及氮肥分配方式对作物产量及环境的影响(试验1)					3.25942
328	Shanxi	2009年山西省冬小麦不同施氮量及氮肥分配方式对作物产量及环境的影响(试验1)		3.05183			19.2524
329	Shanxi	2009年山西省冬小麦不同施氮量及氮肥分配方式对作物产量及环境的影响(试验1)		2.49133			17.5563
330	Shanxi	2009年山西省冬小麦不同施氮量及氮肥分配方式对作物产量及环境的影响(试验1)		7.52633			26.5309
331	Shanxi	2009年山西省冬小麦不同施氮量及氮肥分配方式对作物产量及环境的影响(试验1)		2.51033			11.3303
332	Shanxi	2009年山西省冬小麦不同施氮量及氮肥分配方式对作物产量及环境的影响(试验1)		4.40083			21.6665
333	Shanxi	2009年山西省冬小麦不同施氮量及氮肥分配方式对作物产量及环境的影响(试验1)		3.87833			22.5
334	Shanxi	2009年山西省冬小麦不同施氮量及氮肥分配方式对作物产量及环境的影响(试验1)		8.15333			34.0063
335	Shanxi	2009年山西省冬小麦不同施氮量及氮肥分配方式对作物产量及环境的影响(试验1)		7.46933			26.44
336	Shanxi	2009年山西省冬小麦不同施氮量及氮肥分配方式对作物产量及环境的影响(试验1)		9.78022			33.4176
337	Shanxi	2009年山西省冬小麦不同施氮量及氮肥分配方式对作物产量及环境的影响(试验1)		8.17789			26.0692
338	Shanxi	2009年山西省冬小麦不同施氮量及氮肥分配方式对作物产量及环境的影响(试验1)		5.16322			26.055
339	Shanxi	2009年山西省冬小麦不同施氮量及氮肥分配方式对作物产量及环境的影响(试验1)		2.37656			13.7706
340	Shanxi	2009年山西省冬小麦不同施氮量及氮肥分配方式对作物产量及环境的影响(试验1)		9.78656			40.3271
341	Shanxi	2009年山西省冬小麦不同施氮量及氮肥分配方式对作物产量及环境的影响(试验1)		7.48756			31.474
342	Shanxi	2009年山西省冬小麦不同施氮量及氮肥分配方式对作物产量及环境的影响(试验1)		5.11889			27.0393
343	Shanxi	2009年山西省冬小麦不同施氮量及氮肥分配方式对作物产量及环境的影响(试验1)		6.03089			28.1787
344	Shanxi	2009年山西省冬小麦不同施氮量及氮肥分配方式对作物产量及环境的影响(试验1)		8.55156			30.208
345	Shanxi	2009年山西省冬小麦不同施氮量及氮肥分配方式对作物产量及环境的影响(试验1)		13.3649			38.4029
346	Shanxi	2009年山西省冬小麦不同施氮量及氮肥分配方式对作物产量及环境的影响(试验1)		11.1356			39.1389
347	Shanxi	2009年山西省冬小麦不同施氮量及氮肥分配方式对作物产量及环境的影响(试验1)		8.67822			27.8791
348	Shanxi	2009年山西省冬小麦不同施氮量及氮肥分配方式对作物产量及环境的影响(试验1)		9.66267			29.1401
349	Shanxi	2009年山西省冬小麦不同施氮量及氮肥分配方式对作物产量及环境的影响(试验1)		9.08792			26.298
350	Shanxi	2009年山西省冬小麦不同施氮量及氮肥分配方式对作物产量及环境的影响(试验1)		6.78892			22.3948
351	Shanxi	2009年山西省冬小麦不同施氮量及氮肥分配方式对作物产量及环境的影响(试验1)		4.71792			18.8051
352	Shanxi	2009年山西省冬小麦不同施氮量及氮肥分配方式对作物产量及环境的影响(试验1)		4.97893			20.8711
353	Shanxi	2009年山西省冬小麦不同施氮量及氮肥分配方式对作物产量及环境的影响(试验1)		5.83773			24.9369
354	Shanxi	2009年山西省冬小麦不同施氮量及氮肥分配方式对作物产量及环境的影响(试验1)		1.33473			11.7274
355	Shanxi	2009年山西省冬小麦不同施氮量及氮肥分配方式对作物产量及环境的影响(试验1)		3.61473			18.9902
356	Shanxi	2009年山西省冬小麦养分限制因子研究(试验3)		2.89886	2.79029	4.944	10.6852	13.6574	14.3172
357	Shanxi	2009年山西省冬小麦养分限制因子研究(试验3)		4.00629	9.576	12.582	19.6035	22.9844	30.49
358	Shanxi	2009年山西省冬小麦养分限制因子研究(试验3)		3.55571	5.96057	3.22133	9.37529	15.0346	14.4428
359	Shanxi	2009年山西省冬小麦养分限制因子研究(试验3)
360	Shanxi	2009年山西省冬小麦养分限制因子研究(试验3)
361	Shanxi	2009年山西省冬小麦养分限制因子研究(试验3)
362	Shanxi	2009年山西省冬小麦养分限制因子研究(试验3)
363	Shanxi	2009年山西省冬小麦养分限制因子研究(试验3)
364	Shanxi	2009年山西省冬小麦养分限制因子研究(试验3)
365	Shanxi	2009年山西省冬小麦养分限制因子研究(试验3)
366	Shanxi	2009年山西省冬小麦养分限制因子研究(试验3)
367	Shanxi	2009年山西省冬小麦养分限制因子研究(试验3)
368	Shanxi	2009年山西省冬小麦养分限制因子研究(试验3)
369	Shanxi	2009年山西省冬小麦养分限制因子研究(试验3)		0.584762			3.15778
370	Shanxi	2009年山西省冬小麦养分限制因子研究(试验3)		3.95952			13.2829
371	Shanxi	2009年山西省冬小麦养分限制因子研究(试验3)
372	Shanxi	2009年山西省冬小麦养分限制因子研究(试验3)
373	Shanxi	2009年山西省冬小麦养分限制因子研究(试验3)
374	Shanxi	2009年山西省冬小麦养分限制因子研究(试验3)
375	Shanxi	2009年山西省冬小麦养分限制因子研究(试验3)
376	Shanxi	2009年山西省冬小麦养分限制因子研究(试验3)
377	Shanxi	2009年山西省冬小麦高效施肥技术集成研究(试验4)
381	Shanxi	2009年山西省冬小麦高效施肥技术集成研究(试验4)
385	Shanxi	2009年山西省冬小麦高效施肥技术集成研究(试验4)
389	Shanxi	2009年山西省冬小麦高效施肥技术集成研究(试验4)
393	Shanxi	2009年山西省冬小麦高效施肥技术集成研究(试验4)
397	Shanxi	2009年山西省冬小麦高效施肥技术集成研究(试验4)
401	Shanxi	2009年山西省冬小麦氮适宜用量研究(试验2)
402	Shanxi	2009年山西省冬小麦氮适宜用量研究(试验2)
403	Shanxi	2009年山西省冬小麦氮适宜用量研究(试验2)
404	Shanxi	2009年山西省冬小麦氮适宜用量研究(试验2)
405	Shanxi	2009年山西省冬小麦氮适宜用量研究(试验2)
406	Shanxi	2009年山西省冬小麦氮适宜用量研究(试验2)
407	Shanxi	2009年山西省冬小麦氮适宜用量研究(试验2)
408	Shanxi	2009年山西省冬小麦氮适宜用量研究(试验2)
413	Shanxi	2009年山西省冬小麦氮适宜用量研究(试验2)		7.24844			37.6142
414	Shanxi	2009年山西省冬小麦氮适宜用量研究(试验2)		6.80511			31.1486
415	Shanxi	2009年山西省冬小麦氮适宜用量研究(试验2)		5.89311			34.2223
416	Shanxi	2009年山西省冬小麦氮适宜用量研究(试验2)		12.6444			1.16956
421	Shanxi	2009年山西省冬小麦磷适宜用量研究(试验2)
425	Shanxi	2009年山西省冬小麦磷适宜用量研究(试验2)
433	Shanxi	2009年山西省冬小麦磷适宜用量研究(试验2)			9.85286			7.58789
441	Shanxi	2009年山西省冬小麦钾适宜用量研究(试验2)
445	Shanxi	2009年山西省冬小麦钾适宜用量研究(试验2)
453	Shanxi	2009年山西省冬小麦钾适宜用量研究(试验2)				13.794			33.1489
461	Shanxi	2009年山西省轮作条件下冬小麦养分耗竭后土壤恢复研究(试验6)		6.89689	15.3669	6.6492	38.1323	16.0726	19.1572
462	Shanxi	2009年山西省轮作条件下冬小麦养分耗竭后土壤恢复研究(试验6)		2.55222	10.1533	2.739	30.2667	15.8423	22.3787
465	Shanxi	2009年山西省轮作条件下冬小麦养分耗竭后土壤恢复研究(试验6)
466	Shanxi	2009年山西省轮作条件下冬小麦养分耗竭后土壤恢复研究(试验6)
469	Shanxi	2009年山西省轮作条件下冬小麦养分耗竭后土壤恢复研究(试验6)
470	Shanxi	2009年山西省轮作条件下冬小麦养分耗竭后土壤恢复研究(试验6)
473	Shanxi	2009年山西省轮作条件下冬小麦养分耗竭后土壤恢复研究(试验6)
474	Shanxi	2009年山西省轮作条件下冬小麦养分耗竭后土壤恢复研究(试验6)
477	Shanxi	2009年山西省轮作条件下冬小麦养分耗竭后土壤恢复研究(试验6)
478	Shanxi	2009年山西省轮作条件下冬小麦养分耗竭后土壤恢复研究(试验6)
481	Shanxi	2009年山西省轮作条件下冬小麦养分耗竭后土壤恢复研究(试验6)
482	Shanxi	2009年山西省轮作条件下冬小麦养分耗竭后土壤恢复研究(试验6)
485	Shanxi	2009年山西省在轮作条件下长期施用钾肥对冬小麦钾素循环与调控(试验5)
486	Shanxi	2009年山西省在轮作条件下长期施用钾肥对冬小麦钾素循环与调控(试验5)
489	Shanxi	2009年山西省在轮作条件下长期施用钾肥对冬小麦钾素循环与调控(试验5)				1.896			9.12232
490	Shanxi	2009年山西省在轮作条件下长期施用钾肥对冬小麦钾素循环与调控(试验5)							3.71135
493	Shanxi	2009年山西省在轮作条件下长期施用钾肥对冬小麦钾素循环与调控(试验5)
494	Shanxi	2009年山西省在轮作条件下长期施用钾肥对冬小麦钾素循环与调控(试验5)
497	Shanxi	2009年山西省在轮作条件下长期施用钾肥对冬小麦钾素循环与调控(试验5)				3.2032			15.8662
498	Shanxi	2009年山西省在轮作条件下长期施用钾肥对冬小麦钾素循环与调控(试验5)							6.94859
501	Shanxi	2008年山西省冬小麦－夏玉米轮作条件下养分限制因子研究01		32.9078	10.188	3.0525	79.774	13.2892	8.57552
502	Shanxi	2008年山西省冬小麦－夏玉米轮作条件下养分限制因子研究01		31.1978	8.136	1.5135	79.8176
505	Shanxi	2008年山西省冬小麦－夏玉米轮作条件下养分限制因子研究01
506	Shanxi	2008年山西省冬小麦－夏玉米轮作条件下养分限制因子研究01
509	Shanxi	2008年山西省冬小麦－夏玉米轮作条件下养分限制因子研究01
510	Shanxi	2008年山西省冬小麦－夏玉米轮作条件下养分限制因子研究01
513	Shanxi	2008年山西省冬小麦－夏玉米轮作条件下养分限制因子研究01
514	Shanxi	2008年山西省冬小麦－夏玉米轮作条件下养分限制因子研究01
517	Shanxi	2008年山西省冬小麦－夏玉米轮作条件下养分限制因子研究01
518	Shanxi	2008年山西省冬小麦－夏玉米轮作条件下养分限制因子研究01
521	Shanxi	2008年山西省冬小麦－夏玉米轮作条件下养分限制因子研究01
522	Shanxi	2008年山西省冬小麦－夏玉米轮作条件下养分限制因子研究01
523	Shanxi	2008年山西省冬小麦－夏玉米轮作条件下养分限制因子研究01
525	Shanxi	2004年山西省钾肥长期定位试验总结(试验1)
529	Shanxi	2004年山西省钾肥长期定位试验总结(试验1)				2.60333			14.6307
533	Shanxi	2004年山西省钾肥长期定位试验总结(试验1)
537	Shanxi	2004年山西省钾肥长期定位试验总结(试验1)				6.00667			18.1976
541	Shanxi	2008年山西省冬小麦－夏玉米长期施用钾肥下钾素循环与调控（小麦）
545	Shanxi	2008年山西省冬小麦－夏玉米长期施用钾肥下钾素循环与调控（小麦）				1.1856			8.88479
549	Shanxi	2008年山西省冬小麦－夏玉米长期施用钾肥下钾素循环与调控（小麦）
553	Shanxi	2008年山西省冬小麦－夏玉米长期施用钾肥下钾素循环与调控（小麦）				6.6576			19.7321
557	Shanxi	2006年山西省临汾市长期施用钾肥下冬小麦钾素循环与调控
558	Shanxi	2006年山西省临汾市长期施用钾肥下冬小麦钾素循环与调控
559	Shanxi	2006年山西省临汾市长期施用钾肥下冬小麦钾素循环与调控
560	Shanxi	2006年山西省临汾市长期施用钾肥下冬小麦钾素循环与调控
561	Shanxi	2006年山西省临汾市长期施用钾肥下冬小麦钾素循环与调控				5.81227			24.1051
562	Shanxi	2006年山西省临汾市长期施用钾肥下冬小麦钾素循环与调控				1.86027			13.3045
563	Shanxi	2006年山西省临汾市长期施用钾肥下冬小麦钾素循环与调控				5.58427			22.9258
564	Shanxi	2006年山西省临汾市长期施用钾肥下冬小麦钾素循环与调控				5.05987			14.2982
565	Shanxi	2006年山西省临汾市长期施用钾肥下冬小麦钾素循环与调控
566	Shanxi	2006年山西省临汾市长期施用钾肥下冬小麦钾素循环与调控
567	Shanxi	2006年山西省临汾市长期施用钾肥下冬小麦钾素循环与调控
568	Shanxi	2006年山西省临汾市长期施用钾肥下冬小麦钾素循环与调控
569	Shanxi	2006年山西省临汾市长期施用钾肥下冬小麦钾素循环与调控				5.07507			4.29592
570	Shanxi	2006年山西省临汾市长期施用钾肥下冬小麦钾素循环与调控				8.47227			28.0733
571	Shanxi	2006年山西省临汾市长期施用钾肥下冬小麦钾素循环与调控				13.1463			31.5652
572	Shanxi	2006年山西省临汾市长期施用钾肥下冬小麦钾素循环与调控				8.44947			19.468
573	Shanxi	2010年冬小麦-夏玉米轮作氮肥调控技术研究（小麦）
574	Shanxi	2010年冬小麦-夏玉米轮作氮肥调控技术研究（小麦）
575	Shanxi	2010年冬小麦-夏玉米轮作氮肥调控技术研究（小麦）
576	Shanxi	2010年冬小麦-夏玉米轮作氮肥调控技术研究（小麦）
577	Shanxi	2010年冬小麦-夏玉米轮作氮肥调控技术研究（小麦）		3.29798			11.2052
578	Shanxi	2010年冬小麦-夏玉米轮作氮肥调控技术研究（小麦）		7.01655			18.8967
579	Shanxi	2010年冬小麦-夏玉米轮作氮肥调控技术研究（小麦）		5.00119			15.6976
580	Shanxi	2010年冬小麦-夏玉米轮作氮肥调控技术研究（小麦）		7.07762			21.693
581	Shanxi	2010年冬小麦-夏玉米轮作氮肥调控技术研究（小麦）		4.94614			22.9228
582	Shanxi	2010年冬小麦-夏玉米轮作氮肥调控技术研究（小麦）		5.77249			23.3967
583	Shanxi	2010年冬小麦-夏玉米轮作氮肥调控技术研究（小麦）		4.9582			22.6536
584	Shanxi	2010年冬小麦-夏玉米轮作氮肥调控技术研究（小麦）		6.23693			24.1471
585	Shanxi	2010年冬小麦-夏玉米轮作氮肥调控技术研究（小麦）		3.56667			9.183
586	Shanxi	2010年冬小麦-夏玉米轮作氮肥调控技术研究（小麦）		5.52095			14.8994
587	Shanxi	2010年冬小麦-夏玉米轮作氮肥调控技术研究（小麦）		2.26381			5.61406
588	Shanxi	2010年冬小麦-夏玉米轮作氮肥调控技术研究（小麦）		2.91524			7.09564
589	Shanxi	2010年冬小麦-夏玉米轮作氮肥调控技术研究（小麦）		1.85567			9.77616
590	Shanxi	2010年冬小麦-夏玉米轮作氮肥调控技术研究（小麦）		3.86424			16.501
591	Shanxi	2010年冬小麦-夏玉米轮作氮肥调控技术研究（小麦）		2.79333			12.6213
592	Shanxi	2010年冬小麦-夏玉米轮作氮肥调控技术研究（小麦）		2.79333			12.0566
593	Shanxi	2010年冬小麦-夏玉米轮作氮肥调控技术研究（小麦）		0.787222			3.42404
594	Shanxi	2010年冬小麦-夏玉米轮作氮肥调控技术研究（小麦）		1.33008			6.07582
595	Shanxi	2010年冬小麦-夏玉米轮作氮肥调控技术研究（小麦）		1.31651			5.05554
596	Shanxi	2010年冬小麦-夏玉米轮作氮肥调控技术研究（小麦）		1.57437			7.04562
597	Shanxi	2006年冬小麦/夏玉米轮作条件下冬小麦养分限制因子研究		15.2127	5.244	1.6701	35.7821	9.07526	7.85643
601	Shanxi	2006年冬小麦/夏玉米轮作条件下冬小麦养分限制因子研究
605	Shanxi	2006年冬小麦/夏玉米轮作条件下冬小麦养分限制因子研究
609	Shanxi	2006年冬小麦/夏玉米轮作条件下冬小麦养分限制因子研究
613	Shanxi	2006年冬小麦/夏玉米轮作条件下冬小麦养分限制因子研究
617	Shanxi	2006年冬小麦/夏玉米轮作条件下冬小麦养分限制因子研究
440	Shandong	2006年山东省主要土类小麦施肥长期定位试验（棕壤）
443	Shandong	2006年山东省主要土类小麦施肥长期定位试验（棕壤）
446	Shandong	2006年山东省主要土类小麦施肥长期定位试验（棕壤）
449	Shandong	2006年山东省主要土类小麦施肥长期定位试验（棕壤）
452	Shandong	2006年山东省主要土类小麦施肥长期定位试验（棕壤）
455	Shandong	2006年山东省主要土类小麦施肥长期定位试验（棕壤）		14.4315	22.8913	3.18733	42.8059	39.1692	25.9558
458	Shandong	2006年山东省主要土类小麦施肥长期定位试验（棕壤）		22.3911			68.3367	38.8516
461	Shandong	2006年山东省主要土类小麦施肥长期定位试验（棕壤）		15.4952			49.5478
520	Shandong	2006年山东省小麦平衡施肥试验（海阳杜格庄村）
521	Shandong	2006年山东省小麦平衡施肥试验（海阳杜格庄村）
522	Shandong	2006年山东省小麦平衡施肥试验（海阳杜格庄村）
523	Shandong	2006年山东省小麦平衡施肥试验（海阳杜格庄村）				6.85
524	Shandong	2006年山东省小麦平衡施肥试验（海阳杜格庄村）				9.55833			12.9875
525	Shandong	2006年山东省小麦平衡施肥试验（海阳杜格庄村）				6.725			22.9706
526	Shandong	2006年山东省小麦平衡施肥试验（海阳杜格庄村）				7.92778
527	Shandong	2006年山东省小麦平衡施肥试验（海阳杜格庄村）				8.98333			8.07399
528	Shandong	2006年山东省小麦平衡施肥试验（海阳杜格庄村）				8.20556			32.3896
529	Shandong	2006年山东省小麦平衡施肥试验（海阳杜格庄村）				6.57083			7.90222
530	Shandong	2006年山东省小麦平衡施肥试验（海阳杜格庄村）				5.4875			12.1501
531	Shandong	2006年山东省小麦平衡施肥试验（海阳杜格庄村）				6.8625			17.2036
532	Shandong	2006年山东省小麦平衡施肥示范（海阳杜格庄村）
533	Shandong	2006年山东省小麦平衡施肥示范（海阳杜格庄村）				6.67333			25.6376
534	Shandong	2006年山东省主要土类小麦施肥长期定位试验（褐土）
537	Shandong	2006年山东省主要土类小麦施肥长期定位试验（褐土）
540	Shandong	2006年山东省主要土类小麦施肥长期定位试验（褐土）
543	Shandong	2006年山东省主要土类小麦施肥长期定位试验（褐土）
546	Shandong	2006年山东省主要土类小麦施肥长期定位试验（褐土）
549	Shandong	2006年山东省主要土类小麦施肥长期定位试验（褐土）		9.65227	26.4273	12.2927	31.234	48.6066
552	Shandong	2006年山东省主要土类小麦施肥长期定位试验（褐土）		17.3422			55.0562	48.697
555	Shandong	2006年山东省主要土类小麦施肥长期定位试验（褐土）		9.4739			31.6532
561	Shandong	2007年山东省小麦养分限制因子试验（海阳市成家）
562	Shandong	2007年山东省小麦养分限制因子试验（海阳市成家）
563	Shandong	2007年山东省小麦养分限制因子试验（海阳市成家）
564	Shandong	2007年山东省小麦养分限制因子试验（海阳市成家）		8.66667		11.6083	24.3153		34.1185
565	Shandong	2007年山东省小麦养分限制因子试验（海阳市成家）		8.01042		10.2958	17.9806		25.2366
566	Shandong	2007年山东省小麦养分限制因子试验（海阳市成家）		7.16667		8.60833	8.21046	14.9514	4.40329
567	Shandong	2007年山东省小麦养分限制因子试验（海阳市成家）
568	Shandong	2007年山东省小麦养分限制因子试验（海阳市成家）
569	Shandong	2007年山东省小麦养分限制因子试验（海阳市成家）
570	Shandong	2007年山东省小麦养分限制因子试验（海阳市成家）
571	Shandong	2007年山东省小麦养分限制因子试验（海阳市成家）
572	Shandong	2007年山东省小麦养分限制因子试验（海阳市成家）
573	Shandong	2007年山东省小麦养分限制因子试验（海阳市成家）
574	Shandong	2007年山东省小麦养分限制因子试验（海阳市成家）
575	Shandong	2007年山东省小麦养分限制因子试验（海阳市成家）
576	Shandong	2007年山东省小麦养分限制因子试验（海阳市成家）		6.16	10.4978	10.4978	24.9476	2.69706	10.0114
577	Shandong	2007年山东省小麦养分限制因子试验（海阳市成家）		8.72	13.0578	13.0578	36.8057	5.40094	12.5738
578	Shandong	2007年山东省小麦养分限制因子试验（海阳市成家）		12.1333	16.4711	16.4711	38.898	8.32436	6.28475
579	Shandong	2007年山东省小麦养分限制因子试验（海阳市成家）
580	Shandong	2007年山东省小麦养分限制因子试验（海阳市成家）
581	Shandong	2007年山东省小麦养分限制因子试验（海阳市成家）
582	Shandong	2007年山东省小麦养分限制因子试验（海阳市成家）
583	Shandong	2007年山东省小麦养分限制因子试验（海阳市成家）
584	Shandong	2007年山东省小麦养分限制因子试验（海阳市成家）
585	Shandong	2007年山东省小麦养分限制因子试验（海阳市成家）
586	Shandong	2007年山东省小麦养分限制因子试验（海阳市成家）
587	Shandong	2007年山东省小麦养分限制因子试验（海阳市成家）
594	Shandong	2008年山东省冬小麦养分吸收规律研究（青州廉颇村）
600	Shandong	2008年山东省冬小麦养分吸收规律研究（青州廉颇村）
606	Shandong	2008年山东省冬小麦养分吸收规律研究（青州廉颇村）
614	Shandong	2008年山东省冬小麦养分吸收规律研究（青州廉颇村）
618	Shandong	2008年山东省冬小麦养分吸收规律研究（青州廉颇村）
626	Shandong	2008年山东省冬小麦养分吸收规律研究（青州廉颇村）
632	Shandong	2008年山东省冬小麦养分吸收规律研究（青州廉颇村）
638	Shandong	2008年山东省冬小麦养分吸收规律研究（青州廉颇村）
642	Shandong	2008年山东省钾肥不同基追比对小麦/玉米养分需求与供给的影响研究（小麦，青州廉颇村）
643	Shandong	2008年山东省钾肥不同基追比对小麦/玉米养分需求与供给的影响研究（小麦，青州廉颇村）
644	Shandong	2008年山东省钾肥不同基追比对小麦/玉米养分需求与供给的影响研究（小麦，青州廉颇村）
645	Shandong	2008年山东省钾肥不同基追比对小麦/玉米养分需求与供给的影响研究（小麦，青州廉颇村）				7.94167			23.9715
646	Shandong	2008年山东省钾肥不同基追比对小麦/玉米养分需求与供给的影响研究（小麦，青州廉颇村）				6.44167			57.9734
647	Shandong	2008年山东省钾肥不同基追比对小麦/玉米养分需求与供给的影响研究（小麦，青州廉颇村）				6.775			32.2193
648	Shandong	2008年山东省钾肥不同基追比对小麦/玉米养分需求与供给的影响研究（小麦，青州廉颇村）				3.275			10.2306
649	Shandong	2008年山东省钾肥不同基追比对小麦/玉米养分需求与供给的影响研究（小麦，青州廉颇村）				2.10833			26.3798
650	Shandong	2008年山东省钾肥不同基追比对小麦/玉米养分需求与供给的影响研究（小麦，青州廉颇村）				0.275			35.1273
651	Shandong	2008年山东省钾肥不同基追比对小麦/玉米养分需求与供给的影响研究（小麦，青州廉颇村）				2.44167			11.1346
652	Shandong	2008年山东省钾肥不同基追比对小麦/玉米养分需求与供给的影响研究（小麦，青州廉颇村）				2.10833			16.7716
653	Shandong	2008年山东省钾肥不同基追比对小麦/玉米养分需求与供给的影响研究（小麦，青州廉颇村）				5.94167			40.7738
654	Shandong	2008年山东省氮肥不同基追比对小麦/玉米养分需求与供给的影响研究（小麦，青州廉颇村）
655	Shandong	2008年山东省氮肥不同基追比对小麦/玉米养分需求与供给的影响研究（小麦，青州廉颇村）
656	Shandong	2008年山东省氮肥不同基追比对小麦/玉米养分需求与供给的影响研究（小麦，青州廉颇村）
657	Shandong	2008年山东省氮肥不同基追比对小麦/玉米养分需求与供给的影响研究（小麦，青州廉颇村）		4.51141			23.8214
658	Shandong	2008年山东省氮肥不同基追比对小麦/玉米养分需求与供给的影响研究（小麦，青州廉颇村）		3.41192			26.5219
659	Shandong	2008年山东省氮肥不同基追比对小麦/玉米养分需求与供给的影响研究（小麦，青州廉颇村）		2.93712			12.9105
660	Shandong	2008年山东省氮肥不同基追比对小麦/玉米养分需求与供给的影响研究（小麦，青州廉颇村）		5.88882			28.324
661	Shandong	2008年山东省氮肥不同基追比对小麦/玉米养分需求与供给的影响研究（小麦，青州廉颇村）		4.41905			27.2298
662	Shandong	2008年山东省氮肥不同基追比对小麦/玉米养分需求与供给的影响研究（小麦，青州廉颇村）		3.95559			13.0373
663	Shandong	2008年山东省氮肥不同基追比对小麦/玉米养分需求与供给的影响研究（小麦，青州廉颇村）		7.62517			23.7671
664	Shandong	2008年山东省氮肥不同基追比对小麦/玉米养分需求与供给的影响研究（小麦，青州廉颇村）		6.69907			25.2904
665	Shandong	2008年山东省氮肥不同基追比对小麦/玉米养分需求与供给的影响研究（小麦，青州廉颇村）		5.20579			20.0179
666	Shandong	2008年山东省氮肥不同基追比对小麦/玉米养分需求与供给的影响研究（小麦，青州廉颇村）		6.22467			19.286
667	Shandong	2008年山东省氮肥不同基追比对小麦/玉米养分需求与供给的影响研究（小麦，青州廉颇村）		4.90479			15.6272
668	Shandong	2008年山东省氮肥不同基追比对小麦/玉米养分需求与供给的影响研究（小麦，青州廉颇村）		5.40268			15.7819
672	Shandong	2009年山东省小麦返青期和拔节期追肥SPAD阈值的确定试验研究（青州市廉颇村）
678	Shandong	2009年山东省小麦返青期和拔节期追肥SPAD阈值的确定试验研究（青州市廉颇村）
681	Shandong	2009年山东省小麦返青期和拔节期追肥SPAD阈值的确定试验研究（青州市廉颇村）
690	Shandong	2009年山东省小麦返青期和拔节期追肥SPAD阈值的确定试验研究（青州市廉颇村）
696	Shandong	2009年山东省小麦返青期和拔节期追肥SPAD阈值的确定试验研究（青州市廉颇村）		2.17833			14.9108
704	Shandong	2009年山东省小麦返青期和拔节期追肥SPAD阈值的确定试验研究（青州市廉颇村）		5.49833			8.99365
705	Shandong	2009年山东省小麦返青期和拔节期追肥SPAD阈值的确定试验研究（青州市廉颇村）		3.34333			24.2808
714	Shandong	2009年山东省小麦返青期和拔节期追肥SPAD阈值的确定试验研究（青州市廉颇村）		3.695			26.5049
720	Shandong	2009年山东省小麦返青期和拔节期追肥SPAD阈值的确定试验研究（青州市廉颇村）		6.6725			21.1723
728	Shandong	2009年山东省小麦返青期和拔节期追肥SPAD阈值的确定试验研究（青州市廉颇村）		5.85167			11.0007
729	Shandong	2009年山东省小麦返青期和拔节期追肥SPAD阈值的确定试验研究（青州市廉颇村）		6.62417			14.6658
738	Shandong	2009年山东省小麦返青期和拔节期追肥SPAD阈值的确定试验研究（青州市廉颇村）		7.66083			38.9283
744	Shandong	2009年山东省小麦返青期和拔节期追肥SPAD阈值的确定试验研究（青州市廉颇村）		4.89944			14.681
752	Shandong	2009年山东省小麦返青期和拔节期追肥SPAD阈值的确定试验研究（青州市廉颇村）		5.44611			25.0451
756	Shandong	2009年山东省小麦返青期和拔节期追肥SPAD阈值的确定试验研究（青州市廉颇村）		5.72167			26.8585
762	Shandong	2009年山东省小麦返青期和拔节期追肥SPAD阈值的确定试验研究（青州市廉颇村）		5.24278			30.4217
768	Shandong	2009年山东省小麦返青期和拔节期追肥SPAD阈值的确定试验研究（青州市廉颇村）		5.585			17.9257
776	Shandong	2009年山东省小麦返青期和拔节期追肥SPAD阈值的确定试验研究（青州市廉颇村）		5.14833			21.9741
780	Shandong	2009年山东省小麦返青期和拔节期追肥SPAD阈值的确定试验研究（青州市廉颇村）		4.60292			17.3752
786	Shandong	2009年山东省小麦返青期和拔节期追肥SPAD阈值的确定试验研究（青州市廉颇村）		5.08708			17.9068
792	Shandong	2009年山东省小麦返青期和拔节期追肥SPAD阈值的确定试验研究（青州市廉颇村）		4.01567			15.3211
800	Shandong	2009年山东省小麦返青期和拔节期追肥SPAD阈值的确定试验研究（青州市廉颇村）		4.49533			13.7203
804	Shandong	2009年山东省小麦返青期和拔节期追肥SPAD阈值的确定试验研究（青州市廉颇村）		3.639			12.3111
812	Shandong	2009年山东省小麦返青期和拔节期追肥SPAD阈值的确定试验研究（青州市廉颇村）		3.3			15.4238
817	Shandong	2009年山东省基于Nmin值的基肥用量与比例的确定小麦试验研究（青州市廉颇村）
821	Shandong	2009年山东省基于Nmin值的基肥用量与比例的确定小麦试验研究（青州市廉颇村）
828	Shandong	2009年山东省基于Nmin值的基肥用量与比例的确定小麦试验研究（青州市廉颇村）
831	Shandong	2009年山东省基于Nmin值的基肥用量与比例的确定小麦试验研究（青州市廉颇村）
841	Shandong	2009年山东省基于Nmin值的基肥用量与比例的确定小麦试验研究（青州市廉颇村）		3.335			11.3526
845	Shandong	2009年山东省基于Nmin值的基肥用量与比例的确定小麦试验研究（青州市廉颇村）		4.54833			17.5323
853	Shandong	2009年山东省基于Nmin值的基肥用量与比例的确定小麦试验研究（青州市廉颇村）		3.79583			14.1223
855	Shandong	2009年山东省基于Nmin值的基肥用量与比例的确定小麦试验研究（青州市廉颇村）		4.0875			14.7891
865	Shandong	2009年山东省基于Nmin值的基肥用量与比例的确定小麦试验研究（青州市廉颇村）		5.85569			7.57087
869	Shandong	2009年山东省基于Nmin值的基肥用量与比例的确定小麦试验研究（青州市廉颇村）		6.01167			25.8873
877	Shandong	2009年山东省基于Nmin值的基肥用量与比例的确定小麦试验研究（青州市廉颇村）		6.8925			16.3071
881	Shandong	2009年山东省基于Nmin值的基肥用量与比例的确定小麦试验研究（青州市廉颇村）		5.84917			21.9163
890	Shandong	2009年山东省基于Nmin值的基肥用量与比例的确定小麦试验研究（青州市廉颇村）		7.69167			24.6468
893	Shandong	2009年山东省基于Nmin值的基肥用量与比例的确定小麦试验研究（青州市廉颇村）		8.6			24.99
901	Shandong	2009年山东省基于Nmin值的基肥用量与比例的确定小麦试验研究（青州市廉颇村）		7.5425			12.195
905	Shandong	2009年山东省基于Nmin值的基肥用量与比例的确定小麦试验研究（青州市廉颇村）		6.8575			22.6705
909	Shandong	2009年山东省基于Nmin值的基肥用量与比例的确定小麦试验研究（青州市廉颇村）		2.94167			13.5963
918	Shandong	2009年山东省基于Nmin值的基肥用量与比例的确定小麦试验研究（青州市廉颇村）		3.07722			10.2091
925	Shandong	2009年山东省基于Nmin值的基肥用量与比例的确定小麦试验研究（青州市廉颇村）		2.49444			11.3298
929	Shandong	2009年山东省基于Nmin值的基肥用量与比例的确定小麦试验研究（青州市廉颇村）		2.47222			17.7042
933	Shandong	2009年山东省基于Nmin值的基肥用量与比例的确定小麦试验研究（青州市廉颇村）		5.39889			19.5398
942	Shandong	2009年山东省基于Nmin值的基肥用量与比例的确定小麦试验研究（青州市廉颇村）		5.95889			14.3999
950	Shandong	2009年山东省基于Nmin值的基肥用量与比例的确定小麦试验研究（青州市廉颇村）		4.86611			21.0544
953	Shandong	2009年山东省基于Nmin值的基肥用量与比例的确定小麦试验研究（青州市廉颇村）		5.94056			17.5391
957	Shandong	2009年山东省基于Nmin值的基肥用量与比例的确定小麦试验研究（青州市廉颇村）		7.255			40.9413
966	Shandong	2009年山东省基于Nmin值的基肥用量与比例的确定小麦试验研究（青州市廉颇村）		6.41056			26.2836
969	Shandong	2009年山东省基于Nmin值的基肥用量与比例的确定小麦试验研究（青州市廉颇村）		7.02056			26.8444
978	Shandong	2009年山东省基于Nmin值的基肥用量与比例的确定小麦试验研究（青州市廉颇村）		6.45111			32.4084
981	Shandong	2008年山东省小麦-玉米养分限制因子定位试验研究（小麦，青州廉颇村）		2.55596	2.75669	6.5292	15.5931	0.739617	40.4653
982	Shandong	2008年山东省小麦-玉米养分限制因子定位试验研究（小麦，青州廉颇村）		3.28009	4.78424	9.06364	21.4665	14.8507	27.5377
983	Shandong	2008年山东省小麦-玉米养分限制因子定位试验研究（小麦，青州廉颇村）		2.20177	1.76496	5.28953	20.1279	8.0439	19.0599
984	Shandong	2009年山东省基于土壤测试和目标产量的OPT小麦试验研究（青州市廉颇村）		5.41792	2.284	4.37	19.405	8.26721
985	Shandong	2009年山东省基于土壤测试和目标产量的OPT小麦试验研究（青州市廉颇村）		5.605	2.88267	4.86889	27.04	7.07125	35.1661
986	Shandong	2009年山东省基于土壤测试和目标产量的OPT小麦试验研究（青州市廉颇村）		5.045	1.09067	3.37556	18.9937	12.9028	9.20109
987	Shandong	2009年山东省基于土壤测试和目标产量的OPT小麦试验研究（青州市廉颇村）
988	Shandong	2009年山东省基于土壤测试和目标产量的OPT小麦试验研究（青州市廉颇村）
989	Shandong	2009年山东省基于土壤测试和目标产量的OPT小麦试验研究（青州市廉颇村）
990	Shandong	2009年山东省基于土壤测试和目标产量的OPT小麦试验研究（青州市廉颇村）
991	Shandong	2009年山东省基于土壤测试和目标产量的OPT小麦试验研究（青州市廉颇村）
992	Shandong	2009年山东省基于土壤测试和目标产量的OPT小麦试验研究（青州市廉颇村）
993	Shandong	2009年山东省基于土壤测试和目标产量的OPT小麦试验研究（青州市廉颇村）
994	Shandong	2009年山东省基于土壤测试和目标产量的OPT小麦试验研究（青州市廉颇村）
995	Shandong	2009年山东省基于土壤测试和目标产量的OPT小麦试验研究（青州市廉颇村）
996	Shandong	2009年山东省基于土壤测试和目标产量的OPT小麦试验研究（青州市廉颇村）		4.48333			16.943
997	Shandong	2009年山东省基于土壤测试和目标产量的OPT小麦试验研究（青州市廉颇村）		6.22014			27.7354
998	Shandong	2009年山东省基于土壤测试和目标产量的OPT小麦试验研究（青州市廉颇村）		5.62569			12.0935
999	Shandong	2009年山东省基于土壤测试和目标产量的OPT小麦试验研究（青州市廉颇村）
1000	Shandong	2009年山东省基于土壤测试和目标产量的OPT小麦试验研究（青州市廉颇村）
1001	Shandong	2009年山东省基于土壤测试和目标产量的OPT小麦试验研究（青州市廉颇村）
1002	Shandong	2009年山东省基于土壤测试和目标产量的OPT小麦试验研究（青州市廉颇村）
1003	Shandong	2009年山东省基于土壤测试和目标产量的OPT小麦试验研究（青州市廉颇村）
1004	Shandong	2009年山东省基于土壤测试和目标产量的OPT小麦试验研究（青州市廉颇村）
1011	Shandong	2008年山东省小麦-玉米养分限制因子定位试验研究（小麦，青州廉颇村）
1012	Shandong	2008年山东省小麦-玉米养分限制因子定位试验研究（小麦，青州廉颇村）
1013	Shandong	2008年山东省小麦-玉米养分限制因子定位试验研究（小麦，青州廉颇村）
1014	Shandong	2008年山东省小麦-玉米养分限制因子定位试验研究（小麦，青州廉颇村）
1015	Shandong	2008年山东省小麦-玉米养分限制因子定位试验研究（小麦，青州廉颇村）
1016	Shandong	2008年山东省小麦-玉米养分限制因子定位试验研究（小麦，青州廉颇村）
1017	Shandong	2008年山东省小麦-玉米养分限制因子定位试验研究（小麦，青州廉颇村）
1018	Shandong	2008年山东省小麦-玉米养分限制因子定位试验研究（小麦，青州廉颇村）
1019	Shandong	2008年山东省小麦-玉米养分限制因子定位试验研究（小麦，青州廉颇村）
1020	Shandong	2008年山东省小麦-玉米养分限制因子定位试验研究（小麦，青州廉颇村）
1021	Shandong	2008年山东省小麦-玉米养分限制因子定位试验研究（小麦，青州廉颇村）
1022	Shandong	2008年山东省小麦-玉米养分限制因子定位试验研究（小麦，青州廉颇村）
1023	Shandong	2008年山东省小麦-玉米养分限制因子定位试验研究（小麦，青州廉颇村）
1024	Shandong	2008年山东省小麦-玉米养分限制因子定位试验研究（小麦，青州廉颇村）
1025	Shandong	2008年山东省小麦-玉米养分限制因子定位试验研究（小麦，青州廉颇村）
1027	Shandong	2010年山东省基于Nmin值的基肥用量与比例的确定小麦试验研究（德州市平原县）
1032	Shandong	2010年山东省基于Nmin值的基肥用量与比例的确定小麦试验研究（德州市平原县）
1037	Shandong	2010年山东省基于Nmin值的基肥用量与比例的确定小麦试验研究（德州市平原县）
1043	Shandong	2010年山东省基于Nmin值的基肥用量与比例的确定小麦试验研究（德州市平原县）		3.4275
1049	Shandong	2010年山东省基于Nmin值的基肥用量与比例的确定小麦试验研究（德州市平原县）		4.81667			4.21462
1054	Shandong	2010年山东省基于Nmin值的基肥用量与比例的确定小麦试验研究（德州市平原县）					5.15212
1059	Shandong	2010年山东省基于Nmin值的基肥用量与比例的确定小麦试验研究（德州市平原县）		6.48333			15.5924
1064	Shandong	2010年山东省基于Nmin值的基肥用量与比例的确定小麦试验研究（德州市平原县）		8.98333			15.6184
1069	Shandong	2010年山东省基于Nmin值的基肥用量与比例的确定小麦试验研究（德州市平原县）		10.0942			26.3718
1075	Shandong	2010年山东省基于Nmin值的基肥用量与比例的确定小麦试验研究（德州市平原县）		9.81667			20.2986
1080	Shandong	2010年山东省基于Nmin值的基肥用量与比例的确定小麦试验研究（德州市平原县）		12.0392			13.4786
1081	Shandong	2010年山东省基于Nmin值的基肥用量与比例的确定小麦试验研究（德州市平原县）		9.53917			30.0938
1086	Shandong	2010年山东省基于Nmin值的基肥用量与比例的确定小麦试验研究（德州市平原县）		3.02611			8.71833
1091	Shandong	2010年山东省基于Nmin值的基肥用量与比例的确定小麦试验研究（德州市平原县）		1.915			12.2792
1097	Shandong	2010年山东省基于Nmin值的基肥用量与比例的确定小麦试验研究（德州市平原县）		3.21111			6.20419
1102	Shandong	2010年山东省基于Nmin值的基肥用量与比例的确定小麦试验研究（德州市平原县）		6.35944			16.2721
1107	Shandong	2010年山东省基于Nmin值的基肥用量与比例的确定小麦试验研究（德州市平原县）		7.285			19.7604
1112	Shandong	2010年山东省基于Nmin值的基肥用量与比例的确定小麦试验研究（德州市平原县）		8.02611			15.3381
1117	Shandong	2010年山东省基于Nmin值的基肥用量与比例的确定小麦试验研究（德州市平原县）		9.32222			17.1315
1123	Shandong	2010年山东省基于Nmin值的基肥用量与比例的确定小麦试验研究（德州市平原县）		10.9889			25.81
1129	Shandong	2010年山东省基于Nmin值的基肥用量与比例的确定小麦试验研究（德州市平原县）		8.21111			21.5103
1135	Shandong	2010年山东省小麦返青期和拔节期追肥SPAD阈值的确定试验研究（青州市廉颇村）
1140	Shandong	2010年山东省小麦返青期和拔节期追肥SPAD阈值的确定试验研究（青州市廉颇村）
1145	Shandong	2010年山东省小麦返青期和拔节期追肥SPAD阈值的确定试验研究（青州市廉颇村）
1150	Shandong	2010年山东省小麦返青期和拔节期追肥SPAD阈值的确定试验研究（青州市廉颇村）		15.3783			12.0542
1155	Shandong	2010年山东省小麦返青期和拔节期追肥SPAD阈值的确定试验研究（青州市廉颇村）		7.045			45.3707
1160	Shandong	2010年山东省小麦返青期和拔节期追肥SPAD阈值的确定试验研究（青州市廉颇村）		8.155			27.3068
1161	Shandong	2010年山东省小麦返青期和拔节期追肥SPAD阈值的确定试验研究（青州市廉颇村）		8.24417			20.0984
1166	Shandong	2010年山东省小麦返青期和拔节期追肥SPAD阈值的确定试验研究（青州市廉颇村）		5.18917			22.4989
1171	Shandong	2010年山东省小麦返青期和拔节期追肥SPAD阈值的确定试验研究（青州市廉颇村）		9.63333			27.4381
1177	Shandong	2010年山东省小麦返青期和拔节期追肥SPAD阈值的确定试验研究（青州市廉颇村）		6.97778			13.1835
1182	Shandong	2010年山东省小麦返青期和拔节期追肥SPAD阈值的确定试验研究（青州市廉颇村）		5.49611			19.9648
1188	Shandong	2010年山东省小麦返青期和拔节期追肥SPAD阈值的确定试验研究（青州市廉颇村）		8.27389			27.4113
1193	Shandong	2010年山东省小麦返青期和拔节期追肥SPAD阈值的确定试验研究（青州市廉颇村）		7.31667			17.1483
1199	Shandong	2010年山东省小麦返青期和拔节期追肥SPAD阈值的确定试验研究（青州市廉颇村）		6.62208			15.322
1204	Shandong	2010年山东省小麦返青期和拔节期追肥SPAD阈值的确定试验研究（青州市廉颇村）		8.15			24.4216
1210	Shandong	2010年山东省小麦返青期和拔节期追肥SPAD阈值的确定试验研究（青州市廉颇村）		6.07567			9.18806
1215	Shandong	2010年山东省小麦返青期和拔节期追肥SPAD阈值的确定试验研究（青州市廉颇村）		5.18667			14.4829
1220	Shandong	2010年山东省小麦返青期和拔节期追肥SPAD阈值的确定试验研究（青州市廉颇村）		7.07567			18.9468
1221	Shandong	2010年山东省基于土壤测试和目标产量的OPT小麦试验研究（青州市廉颇村）		8.47222	20.0044	15.9259	19.3136	40.129	28.1829
1222	Shandong	2010年山东省基于土壤测试和目标产量的OPT小麦试验研究（青州市廉颇村）		4.58333	7.56	5.55556	15.0103		34.9938
1223	Shandong	2010年山东省基于土壤测试和目标产量的OPT小麦试验研究（青州市廉颇村）		5.69444	11.1156	8.51852	14.9188	27.0643	5.02011
1224	Shandong	2010年山东省基于土壤测试和目标产量的OPT小麦试验研究（青州市廉颇村）
1225	Shandong	2010年山东省基于土壤测试和目标产量的OPT小麦试验研究（青州市廉颇村）
1226	Shandong	2010年山东省基于土壤测试和目标产量的OPT小麦试验研究（青州市廉颇村）
1227	Shandong	2010年山东省基于土壤测试和目标产量的OPT小麦试验研究（青州市廉颇村）
1228	Shandong	2010年山东省基于土壤测试和目标产量的OPT小麦试验研究（青州市廉颇村）
1229	Shandong	2010年山东省基于土壤测试和目标产量的OPT小麦试验研究（青州市廉颇村）
1230	Shandong	2010年山东省基于土壤测试和目标产量的OPT小麦试验研究（青州市廉颇村）
1231	Shandong	2010年山东省基于土壤测试和目标产量的OPT小麦试验研究（青州市廉颇村）
1232	Shandong	2010年山东省基于土壤测试和目标产量的OPT小麦试验研究（青州市廉颇村）
1233	Shandong	2010年山东省基于土壤测试和目标产量的OPT小麦试验研究（青州市廉颇村）		9.72222			12.5352
1234	Shandong	2010年山东省基于土壤测试和目标产量的OPT小麦试验研究（青州市廉颇村）		10.8796			24.5059
1235	Shandong	2010年山东省基于土壤测试和目标产量的OPT小麦试验研究（青州市廉颇村）		8.33333			29.9875
1236	Shandong	2010年山东省基于土壤测试和目标产量的OPT小麦试验研究（青州市廉颇村）
1237	Shandong	2010年山东省基于土壤测试和目标产量的OPT小麦试验研究（青州市廉颇村）
1238	Shandong	2010年山东省基于土壤测试和目标产量的OPT小麦试验研究（青州市廉颇村）
1239	Shandong	2010年山东省基于土壤测试和目标产量的OPT小麦试验研究（青州市廉颇村）
1240	Shandong	2010年山东省基于土壤测试和目标产量的OPT小麦试验研究（青州市廉颇村）
1241	Shandong	2010年山东省基于土壤测试和目标产量的OPT小麦试验研究（青州市廉颇村）
337	Henan	2008-2009河南新坡小麦OPT试验		11.0111	11.3238	7.56476	35.4714	25.7694	11.766
338	Henan	2008-2009河南新坡小麦OPT试验		12.2389	13.4286	9.66952	40.9989	31.2787	13.3172
339	Henan	2008-2009河南新坡小麦OPT试验		13.0389	14.8	11.041	44.6476	25.9681	16.48
340	Henan	2008-2009河南新坡小麦OPT试验
341	Henan	2008-2009河南新坡小麦OPT试验
342	Henan	2008-2009河南新坡小麦OPT试验
343	Henan	2008-2009河南新坡小麦OPT试验
344	Henan	2008-2009河南新坡小麦OPT试验
345	Henan	2008-2009河南新坡小麦OPT试验
346	Henan	2008-2009河南新坡小麦OPT试验
347	Henan	2008-2009河南新坡小麦OPT试验
348	Henan	2008-2009河南新坡小麦OPT试验
349	Henan	2008-2009河南新坡小麦OPT试验
350	Henan	2008-2009河南新坡小麦OPT试验
351	Henan	2008-2009河南新坡小麦OPT试验
352	Henan	2008-2009河南新坡小麦OPT试验
353	Henan	2008-2009河南新坡小麦OPT试验
354	Henan	2008-2009河南新坡小麦OPT试验
355	Henan	2008-2009河南平陵小麦OPT试验		9.07556	10.1876	7.79714	31.8845	14.2536	14.9621
356	Henan	2008-2009河南平陵小麦OPT试验		10.0844	12.3495	9.95905	38.5421	28.8218	16.6453
357	Henan	2008-2009河南平陵小麦OPT试验		10.7467	13.7686	11.3781	40.5413	33.7558	20.0796
358	Henan	2008-2009河南平陵小麦OPT试验
359	Henan	2008-2009河南平陵小麦OPT试验
360	Henan	2008-2009河南平陵小麦OPT试验
361	Henan	2008-2009河南平陵小麦OPT试验
362	Henan	2008-2009河南平陵小麦OPT试验
363	Henan	2008-2009河南平陵小麦OPT试验
364	Henan	2008-2009河南平陵小麦OPT试验
365	Henan	2008-2009河南平陵小麦OPT试验
366	Henan	2008-2009河南平陵小麦OPT试验
367	Henan	2008-2009河南平陵小麦OPT试验
368	Henan	2008-2009河南平陵小麦OPT试验
369	Henan	2008-2009河南平陵小麦OPT试验
370	Henan	2008-2009河南平陵小麦OPT试验
371	Henan	2008-2009河南平陵小麦OPT试验
372	Henan	2008-2009河南平陵小麦OPT试验
373	Henan	2008-2009河南朱寨小麦OPT试验		8.94222	10.9714	7.68286	29.3971	37.4832	26.1614
374	Henan	2008-2009河南朱寨小麦OPT试验		9.93778	13.1048	9.81619	27.6974	34.7648	24.2984
375	Henan	2008-2009河南朱寨小麦OPT试验		10.5867	14.4952	11.2067	30.0754	38.4817	26.8698
376	Henan	2008-2009河南朱寨小麦OPT试验
377	Henan	2008-2009河南朱寨小麦OPT试验
378	Henan	2008-2009河南朱寨小麦OPT试验
379	Henan	2008-2009河南朱寨小麦OPT试验
380	Henan	2008-2009河南朱寨小麦OPT试验
381	Henan	2008-2009河南朱寨小麦OPT试验
382	Henan	2008-2009河南朱寨小麦OPT试验
383	Henan	2008-2009河南朱寨小麦OPT试验
384	Henan	2008-2009河南朱寨小麦OPT试验
385	Henan	2008-2009河南朱寨小麦OPT试验
386	Henan	2008-2009河南朱寨小麦OPT试验
387	Henan	2008-2009河南朱寨小麦OPT试验
388	Henan	2008-2009河南朱寨小麦OPT试验
389	Henan	2008-2009河南朱寨小麦OPT试验
390	Henan	2008-2009河南朱寨小麦OPT试验
391	Henan	2008-2009河南平陵小麦氮素用量试验
392	Henan	2008-2009河南平陵小麦氮素用量试验
393	Henan	2008-2009河南平陵小麦氮素用量试验
394	Henan	2008-2009河南平陵小麦氮素用量试验
395	Henan	2008-2009河南平陵小麦氮素用量试验
396	Henan	2008-2009河南平陵小麦氮素用量试验
397	Henan	2008-2009河南平陵小麦氮素用量试验		1.42963			3.18603
398	Henan	2008-2009河南平陵小麦氮素用量试验		2.68889			6.4421
399	Henan	2008-2009河南平陵小麦氮素用量试验		3.08148			8.27429
400	Henan	2008-2009河南平陵小麦氮素用量试验		2.37778			2.94144
401	Henan	2008-2009河南平陵小麦氮素用量试验		3.19444			7.63733
402	Henan	2008-2009河南平陵小麦氮素用量试验		3.88333			9.01244
403	Henan	2008-2009河南平陵小麦氮素用量试验		3.14222			19.4039
404	Henan	2008-2009河南平陵小麦氮素用量试验		3.57778			23.983
405	Henan	2008-2009河南平陵小麦氮素用量试验		3.93333			26.1163
406	Henan	2008-2009河南平陵小麦氮素用量试验		2.02963			4.3266
407	Henan	2008-2009河南平陵小麦氮素用量试验		2.47778			6.19256
408	Henan	2008-2009河南平陵小麦氮素用量试验		2.94444			7.60036
409	Henan	2008年河南省浚县冬小麦养分限制因子试验		4.14583	5.48381	4.09222	22.9869	20.467	68.8562
410	Henan	2008年河南省浚县冬小麦养分限制因子试验		4.75	6.86476	5.70333	31.1612		44.5312
411	Henan	2008年河南省浚县冬小麦养分限制因子试验		4.04167	5.24571	3.81444	34.7018	24.1338	85.4884
412	Henan	2008年河南省浚县冬小麦养分限制因子试验
413	Henan	2008年河南省浚县冬小麦养分限制因子试验
414	Henan	2008年河南省浚县冬小麦养分限制因子试验
415	Henan	2008年河南省浚县冬小麦养分限制因子试验
416	Henan	2008年河南省浚县冬小麦养分限制因子试验
417	Henan	2008年河南省浚县冬小麦养分限制因子试验
418	Henan	2008年河南省浚县冬小麦养分限制因子试验
419	Henan	2008年河南省浚县冬小麦养分限制因子试验
420	Henan	2008年河南省浚县冬小麦养分限制因子试验
421	Henan	2008年河南省浚县冬小麦养分限制因子试验
422	Henan	2008年河南省浚县冬小麦养分限制因子试验
423	Henan	2008年河南省浚县冬小麦养分限制因子试验
424	Henan	2008年河南省浚县冬小麦养分限制因子试验
425	Henan	2008年河南省浚县冬小麦养分限制因子试验
426	Henan	2008年河南省浚县冬小麦养分限制因子试验
427	Henan	2008年河南省浚县冬小麦氮肥基追比试验		5.11792			17.0098
428	Henan	2008年河南省浚县冬小麦氮肥基追比试验		3.63875			35.3951
429	Henan	2008年河南省浚县冬小麦氮肥基追比试验		4.34708			10.1957
430	Henan	2008年河南省浚县冬小麦氮肥基追比试验		4.9825			12.5098
431	Henan	2008年河南省浚县冬小麦氮肥基追比试验		2.67			30.8313
432	Henan	2008年河南省浚县冬小麦氮肥基追比试验		4.15958			20.6255
433	Henan	2008年河南省浚县冬小麦氮肥基追比试验
434	Henan	2008年河南省浚县冬小麦氮肥基追比试验
435	Henan	2008年河南省浚县冬小麦氮肥基追比试验
436	Henan	2008年河南省浚县冬小麦氮肥基追比试验		0.930417			8.49794
437	Henan	2008年河南省浚县冬小麦氮肥基追比试验		1.75333			10.7801
438	Henan	2008年河南省浚县冬小麦氮肥基追比试验		0.190833			8.39521
439	Henan	2008年河南省浚县冬小麦氮肥基追比试验		3.06583			9.96199
440	Henan	2008年河南省浚县冬小麦氮肥基追比试验		3.21167			20.3103
441	Henan	2008年河南省浚县冬小麦氮肥基追比试验		4.88875			8.42021
442	Henan	2008年河南省浚县冬小麦钾肥基追比试验
443	Henan	2008年河南省浚县冬小麦钾肥基追比试验
444	Henan	2008年河南省浚县冬小麦钾肥基追比试验
445	Henan	2008年河南省浚县冬小麦钾肥基追比试验				5.25333			42.3541
446	Henan	2008年河南省浚县冬小麦钾肥基追比试验				5.90333			26.4156
447	Henan	2008年河南省浚县冬小麦钾肥基追比试验				6.09222			55.4466
448	Henan	2008年河南省浚县冬小麦钾肥基追比试验				5.48111			26.7911
449	Henan	2008年河南省浚县冬小麦钾肥基追比试验				5.87			84.9817
450	Henan	2008年河南省浚县冬小麦钾肥基追比试验				10.3422			71.5198
451	Henan	2008年河南省浚县冬小麦钾肥基追比试验				3.00889			62.6225
452	Henan	2008年河南省浚县冬小麦钾肥基追比试验				2.59222			65.6103
453	Henan	2008年河南省浚县冬小麦钾肥基追比试验				2.34222			54.2395
454	Henan	2008年河南省浚县冬小麦需肥规律试验
455	Henan	2008年河南省浚县冬小麦需肥规律试验
456	Henan	2008年河南省浚县冬小麦需肥规律试验
457	Henan	2008年河南省浚县冬小麦需肥规律试验
458	Henan	2008年河南省浚县冬小麦需肥规律试验
459	Henan	2008年河南省浚县冬小麦需肥规律试验
460	Henan	2009年河南省浚县冬小麦氮肥运筹试验
461	Henan	2009年河南省浚县冬小麦氮肥运筹试验
462	Henan	2009年河南省浚县冬小麦氮肥运筹试验
463	Henan	2009年河南省浚县冬小麦氮肥运筹试验
464	Henan	2009年河南省浚县冬小麦氮肥运筹试验		5.13192			12.2695
465	Henan	2009年河南省浚县冬小麦氮肥运筹试验		3.42142			11.0191
466	Henan	2009年河南省浚县冬小麦氮肥运筹试验		3.7065			11.5345
467	Henan	2009年河南省浚县冬小麦氮肥运筹试验		5.417			9.74652
468	Henan	2009年河南省浚县冬小麦氮肥运筹试验		4.70433			65.5918
469	Henan	2009年河南省浚县冬小麦氮肥运筹试验		6.69992			63.9977
470	Henan	2009年河南省浚县冬小麦氮肥运筹试验		2.70867			64.7975
471	Henan	2009年河南省浚县冬小麦氮肥运筹试验		5.55958			62.3254
472	Henan	2009年河南省浚县冬小麦氮肥运筹试验		6.27225			45.0262
473	Henan	2009年河南省浚县冬小麦氮肥运筹试验		7.98283			54.1066
474	Henan	2009年河南省浚县冬小麦氮肥运筹试验		9.83592			63.5259
475	Henan	2009年河南省浚县冬小麦氮肥运筹试验		8.6955			48.9826
476	Henan	2009年河南省浚县冬小麦氮肥运筹试验		4.56161			31.8559
477	Henan	2009年河南省浚县冬小麦氮肥运筹试验		7.69761			22.9781
478	Henan	2009年河南省浚县冬小麦氮肥运筹试验		8.07772			25.4386
479	Henan	2009年河南省浚县冬小麦氮肥运筹试验		6.65228			28.0507
480	Henan	2009年河南省浚县冬小麦氮肥运筹试验		4.95783			55.4883
481	Henan	2009年河南省浚县冬小麦氮肥运筹试验		6.49144			53.1413
482	Henan	2009年河南省浚县冬小麦氮肥运筹试验		4.24439			50.7338
483	Henan	2009年河南省浚县冬小麦氮肥运筹试验		3.9505			48.0934
484	Henan	2009年河南省浚县冬小麦氮肥运筹试验		5.51194			57.5261
485	Henan	2009年河南省浚县冬小麦氮肥运筹试验		5.702			65.2785
486	Henan	2009年河南省浚县冬小麦氮肥运筹试验		6.46222			57.3855
487	Henan	2009年河南省浚县冬小麦氮肥运筹试验		7.22244			62.6355
488	Henan	2009年河南省浚县冬小麦氮肥用量试验
489	Henan	2009年河南省浚县冬小麦氮肥用量试验
490	Henan	2009年河南省浚县冬小麦氮肥用量试验
491	Henan	2009年河南省浚县冬小麦氮肥用量试验
492	Henan	2009年河南省浚县冬小麦氮肥用量试验		4.277			38.4102
493	Henan	2009年河南省浚县冬小麦氮肥用量试验		2.5665			65.0325
494	Henan	2009年河南省浚县冬小麦氮肥用量试验		5.7025			58.0209
495	Henan	2009年河南省浚县冬小麦氮肥用量试验		5.41733			50.4451
496	Henan	2009年河南省浚县冬小麦氮肥用量试验		6.27225			45.0262
497	Henan	2009年河南省浚县冬小麦氮肥用量试验		7.98283			54.1066
498	Henan	2009年河南省浚县冬小麦氮肥用量试验		9.83592			63.5259
499	Henan	2009年河南省浚县冬小麦氮肥用量试验		8.6955			48.9826
500	Henan	2009年河南省浚县冬小麦氮肥用量试验		5.51194			57.5261
501	Henan	2009年河南省浚县冬小麦氮肥用量试验		5.702			65.2785
502	Henan	2009年河南省浚县冬小麦氮肥用量试验		6.46222			57.3855
503	Henan	2009年河南省浚县冬小麦氮肥用量试验		7.22244			62.6355
504	Henan	2009年河南省浚县冬小麦氮肥用量试验		3.99142			44.2748
505	Henan	2009年河南省浚县冬小麦氮肥用量试验		3.92012			46.127
506	Henan	2009年河南省浚县冬小麦氮肥用量试验		5.27979			48.6442
507	Henan	2009年河南省浚县冬小麦氮肥用量试验		3.56379			47.0995
508	Henan	2009年河南省浚县冬小麦氮肥用量试验		1.7905			24.4622
509	Henan	2009年河南省浚县冬小麦氮肥用量试验		1.65363			22.4717
510	Henan	2009年河南省浚县冬小麦氮肥用量试验		1.88173			26.5305
511	Henan	2009年河南省浚县冬小麦氮肥用量试验		2.4519			28.6022
544	Henan	2002-2003小麦河南省洛阳孟津县送庄乡朱寨村养分监测村OPT试验		10.3739	11.3975	5.5225	32.9537	33.2546	19.1836
545	Henan	2002-2003小麦河南省洛阳孟津县送庄乡朱寨村养分监测村OPT试验		9.69056	10.3725	4.4975	27.1163	26.5429	14.7212
546	Henan	2002-2003小麦河南省洛阳孟津县送庄乡朱寨村养分监测村OPT试验		7.00722	6.3475	0.4725	21.4835	19.9927	10.4439
547	Henan	2002-2003小麦河南省洛阳孟津县送庄乡朱寨村养分监测村OPT试验
548	Henan	2002-2003小麦河南省洛阳孟津县送庄乡朱寨村养分监测村OPT试验
549	Henan	2002-2003小麦河南省洛阳孟津县送庄乡朱寨村养分监测村OPT试验
550	Henan	2002-2003小麦河南省洛阳孟津县送庄乡朱寨村养分监测村OPT试验
551	Henan	2002-2003小麦河南省洛阳孟津县送庄乡朱寨村养分监测村OPT试验
552	Henan	2002-2003小麦河南省洛阳孟津县送庄乡朱寨村养分监测村OPT试验
553	Henan	2002-2003小麦河南省洛阳孟津县送庄乡朱寨村养分监测村OPT试验
554	Henan	2002-2003小麦河南省洛阳孟津县送庄乡朱寨村养分监测村OPT试验
555	Henan	2002-2003小麦河南省洛阳孟津县送庄乡朱寨村养分监测村OPT试验
556	Henan	2002-2003小麦河南省洛阳孟津县送庄乡朱寨村养分监测村OPT试验
557	Henan	2002-2003小麦河南省洛阳孟津县送庄乡朱寨村养分监测村OPT试验
558	Henan	2002-2003小麦河南省洛阳孟津县送庄乡朱寨村养分监测村OPT试验
575	Henan	2002-2003小麦河南省驻马店遂平县和兴乡养分村OPT试验		0.926111	4.0275	4.7225	5.14049	20.2207	15.6694
576	Henan	2002-2003小麦河南省驻马店遂平县和兴乡养分村OPT试验		2.03722	5.69417	6.38917	5.12941	20.2091	15.64
577	Henan	2002-2003小麦河南省驻马店遂平县和兴乡养分村OPT试验		2.59278	6.5275	7.2225	7.07486	22.7287	17.0588
578	Henan	2002-2003小麦河南省驻马店遂平县和兴乡养分村OPT试验
579	Henan	2002-2003小麦河南省驻马店遂平县和兴乡养分村OPT试验
580	Henan	2002-2003小麦河南省驻马店遂平县和兴乡养分村OPT试验
581	Henan	2002-2003小麦河南省驻马店遂平县和兴乡养分村OPT试验
582	Henan	2002-2003小麦河南省驻马店遂平县和兴乡养分村OPT试验
583	Henan	2002-2003小麦河南省驻马店遂平县和兴乡养分村OPT试验
584	Henan	2002-2003小麦河南省驻马店遂平县和兴乡养分村OPT试验
585	Henan	2002-2003小麦河南省驻马店遂平县和兴乡养分村OPT试验
586	Henan	2002-2003小麦河南省驻马店遂平县和兴乡养分村OPT试验
587	Henan	2002-2003小麦河南省驻马店遂平县和兴乡养分村OPT试验
588	Henan	2002-2003小麦河南省驻马店遂平县和兴乡养分村OPT试验
589	Henan	2002-2003小麦河南省驻马店遂平县和兴乡养分村OPT试验
590	Henan	2003-2004小麦河南驻马店遂平和兴OPT
591	Henan	2003-2004小麦河南驻马店遂平和兴OPT
592	Henan	2003-2004小麦河南驻马店遂平和兴OPT
593	Henan	2003-2004小麦河南驻马店遂平和兴OPT
594	Henan	2003-2004小麦河南驻马店遂平和兴OPT
595	Henan	2003-2004小麦河南驻马店遂平和兴OPT
596	Henan	2003-2004小麦河南驻马店遂平和兴OPT
597	Henan	2003-2004小麦河南驻马店遂平和兴OPT
598	Henan	2003-2004小麦河南驻马店遂平和兴OPT
599	Henan	2003-2004小麦河南驻马店遂平和兴OPT
600	Henan	2003-2004小麦河南驻马店遂平和兴OPT
601	Henan	2003-2004小麦河南驻马店遂平和兴OPT
602	Henan	2003-2004小麦河南驻马店遂平和兴OPT		23.7133	5.73333	9.5875	61.541		32.6178
603	Henan	2003-2004小麦河南驻马店遂平和兴OPT		22.16	2.82083	6.675	52.9527	26.6947	24.8268
604	Henan	2003-2004小麦河南驻马店遂平和兴OPT		22.6067	3.65833	7.5125	54.9648	29.8568	26.6484
623	Henan	2004-2005小麦河南洛阳孟津OPT
624	Henan	2004-2005小麦河南洛阳孟津OPT
625	Henan	2004-2005小麦河南洛阳孟津OPT
626	Henan	2004-2005小麦河南洛阳孟津OPT
627	Henan	2004-2005小麦河南洛阳孟津OPT
628	Henan	2004-2005小麦河南洛阳孟津OPT
629	Henan	2004-2005小麦河南洛阳孟津OPT
630	Henan	2004-2005小麦河南洛阳孟津OPT
631	Henan	2004-2005小麦河南洛阳孟津OPT
632	Henan	2004-2005小麦河南洛阳孟津OPT
633	Henan	2004-2005小麦河南洛阳孟津OPT
634	Henan	2004-2005小麦河南洛阳孟津OPT
635	Henan	2004-2005小麦河南洛阳孟津OPT		6.91667	4.75	5.33333	21.8205	32.9886	25.7736
636	Henan	2004-2005小麦河南洛阳孟津OPT		6.5	4.125	4.70833	15.0768	24.1521	20.8445
637	Henan	2004-2005小麦河南洛阳孟津OPT		7.5	5.625	6.20833	18.6392	28.8732	23.4541
638	Henan	2004-2005小麦河南驻马店遂平和兴OPT
639	Henan	2004-2005小麦河南驻马店遂平和兴OPT
640	Henan	2004-2005小麦河南驻马店遂平和兴OPT
641	Henan	2004-2005小麦河南驻马店遂平和兴OPT
642	Henan	2004-2005小麦河南驻马店遂平和兴OPT
643	Henan	2004-2005小麦河南驻马店遂平和兴OPT
644	Henan	2004-2005小麦河南驻马店遂平和兴OPT
645	Henan	2004-2005小麦河南驻马店遂平和兴OPT
646	Henan	2004-2005小麦河南驻马店遂平和兴OPT
647	Henan	2004-2005小麦河南驻马店遂平和兴OPT
648	Henan	2004-2005小麦河南驻马店遂平和兴OPT
649	Henan	2004-2005小麦河南驻马店遂平和兴OPT
650	Henan	2004-2005小麦河南驻马店遂平和兴OPT		26.5	4.81667	7.60833	71.0931	36.4087	24.4896
651	Henan	2004-2005小麦河南驻马店遂平和兴OPT		26.5667	4.91667	7.70833	65.5198	29.0777	20.545
652	Henan	2004-2005小麦河南驻马店遂平和兴OPT		26.4167	4.69167	7.48333	66.2899	30.1344	21.1077
674	Henan	2005-2006小麦驻马店市遂平县和兴乡和兴村opt试验		11.8667	7.25	8.16667	36.8069	46.9042	18.592
675	Henan	2005-2006小麦驻马店市遂平县和兴乡和兴村opt试验		12	7.5	8.33333	32.7316	40.3928	16.2826
676	Henan	2005-2006小麦驻马店市遂平县和兴乡和兴村opt试验		13.1333	9.625	9.75	36.5616	46.5376	18.4485
677	Henan	2005-2006小麦驻马店市遂平县和兴乡和兴村opt试验
678	Henan	2005-2006小麦驻马店市遂平县和兴乡和兴村opt试验
679	Henan	2005-2006小麦驻马店市遂平县和兴乡和兴村opt试验
680	Henan	2005-2006小麦驻马店市遂平县和兴乡和兴村opt试验
681	Henan	2005-2006小麦驻马店市遂平县和兴乡和兴村opt试验
682	Henan	2005-2006小麦驻马店市遂平县和兴乡和兴村opt试验
683	Henan	2005-2006小麦驻马店市遂平县和兴乡和兴村opt试验
684	Henan	2005-2006小麦驻马店市遂平县和兴乡和兴村opt试验
685	Henan	2005-2006小麦驻马店市遂平县和兴乡和兴村opt试验
686	Henan	2005-2006小麦驻马店市遂平县和兴乡和兴村opt试验
687	Henan	2005-2006小麦驻马店市遂平县和兴乡和兴村opt试验
688	Henan	2005-2006小麦驻马店市遂平县和兴乡和兴村opt试验
689	Henan	2005-2006小麦洛阳孟津县送庄乡朱寨村opt试验		10	8.75	8.33333	26.3167	32.0622	16.9424
690	Henan	2005-2006小麦洛阳孟津县送庄乡朱寨村opt试验		9.2	7.25	7.33333	20.5011	22.3078	13.437
691	Henan	2005-2006小麦洛阳孟津县送庄乡朱寨村opt试验		8.8	6.5	6.83333	20.3319	22.0861	13.3132
692	Henan	2005-2006小麦洛阳孟津县送庄乡朱寨村opt试验
693	Henan	2005-2006小麦洛阳孟津县送庄乡朱寨村opt试验
694	Henan	2005-2006小麦洛阳孟津县送庄乡朱寨村opt试验
695	Henan	2005-2006小麦洛阳孟津县送庄乡朱寨村opt试验
696	Henan	2005-2006小麦洛阳孟津县送庄乡朱寨村opt试验
697	Henan	2005-2006小麦洛阳孟津县送庄乡朱寨村opt试验
698	Henan	2005-2006小麦洛阳孟津县送庄乡朱寨村opt试验
699	Henan	2005-2006小麦洛阳孟津县送庄乡朱寨村opt试验
700	Henan	2005-2006小麦洛阳孟津县送庄乡朱寨村opt试验
701	Henan	2005-2006小麦洛阳孟津县送庄乡朱寨村opt试验
702	Henan	2005-2006小麦洛阳孟津县送庄乡朱寨村opt试验
703	Henan	2005-2006小麦洛阳孟津县送庄乡朱寨村opt试验
704	Henan	2005-2006小麦南阳市农科所opt试验		5.8	6.375	1.5	18.6946	35.2914	14.1796
705	Henan	2005-2006小麦南阳市农科所opt试验		7.13333	8.875	3.16667	18.1159	34.3771	13.8489
706	Henan	2005-2006小麦南阳市农科所opt试验		7.46667	9.5	3.58333	19.7518	37.0293	14.8224
707	Henan	2005-2006小麦南阳市农科所opt试验
708	Henan	2005-2006小麦南阳市农科所opt试验
709	Henan	2005-2006小麦南阳市农科所opt试验
710	Henan	2005-2006小麦南阳市农科所opt试验
711	Henan	2005-2006小麦南阳市农科所opt试验
712	Henan	2005-2006小麦南阳市农科所opt试验
713	Henan	2005-2006小麦南阳市农科所opt试验
714	Henan	2005-2006小麦南阳市农科所opt试验
715	Henan	2005-2006小麦南阳市农科所opt试验
716	Henan	2005-2006小麦南阳市农科所opt试验
717	Henan	2005-2006小麦南阳市农科所opt试验
718	Henan	2005-2006小麦南阳市农科所opt试验
719	Henan	2005-2006小麦新乡市延津县平陵村opt试验		8.66667	5.625	5.83333	26.0821	31.0711	18.6892
720	Henan	2005-2006小麦新乡市延津县平陵村opt试验		9.33333	6.875	6.66667	23.6872	27.2304	17.1809
721	Henan	2005-2006小麦新乡市延津县平陵村opt试验		10	8.125	7.5	26.0915	31.0899	18.5704
722	Henan	2005-2006小麦新乡市延津县平陵村opt试验
723	Henan	2005-2006小麦新乡市延津县平陵村opt试验
724	Henan	2005-2006小麦新乡市延津县平陵村opt试验
725	Henan	2005-2006小麦新乡市延津县平陵村opt试验
726	Henan	2005-2006小麦新乡市延津县平陵村opt试验
727	Henan	2005-2006小麦新乡市延津县平陵村opt试验
728	Henan	2005-2006小麦新乡市延津县平陵村opt试验
729	Henan	2005-2006小麦新乡市延津县平陵村opt试验
730	Henan	2005-2006小麦新乡市延津县平陵村opt试验
731	Henan	2005-2006小麦新乡市延津县平陵村opt试验
732	Henan	2005-2006小麦新乡市延津县平陵村opt试验
733	Henan	2005-2006小麦新乡市延津县平陵村opt试验
734	Henan	2005-2006小麦驻马店市驿城区水屯镇新坡村opt试验		11.6667	6.875	7.91667	29.7334	38.3854	19.4222
735	Henan	2005-2006小麦驻马店市驿城区水屯镇新坡村opt试验		12.1333	7.75	8.5	27.0329	33.9637	17.774
736	Henan	2005-2006小麦驻马店市驿城区水屯镇新坡村opt试验		12.2	7.875	8.58333	27.9588	35.4405	18.3484
737	Henan	2005-2006小麦驻马店市驿城区水屯镇新坡村opt试验
738	Henan	2005-2006小麦驻马店市驿城区水屯镇新坡村opt试验
739	Henan	2005-2006小麦驻马店市驿城区水屯镇新坡村opt试验
740	Henan	2005-2006小麦驻马店市驿城区水屯镇新坡村opt试验
741	Henan	2005-2006小麦驻马店市驿城区水屯镇新坡村opt试验
742	Henan	2005-2006小麦驻马店市驿城区水屯镇新坡村opt试验
743	Henan	2005-2006小麦驻马店市驿城区水屯镇新坡村opt试验
744	Henan	2005-2006小麦驻马店市驿城区水屯镇新坡村opt试验
745	Henan	2005-2006小麦驻马店市驿城区水屯镇新坡村opt试验
746	Henan	2005-2006小麦驻马店市驿城区水屯镇新坡村opt试验
747	Henan	2005-2006小麦驻马店市驿城区水屯镇新坡村opt试验
748	Henan	2005-2006小麦驻马店市驿城区水屯镇新坡村opt试验
918	Henan	2006-2007洛阳孟津县送庄乡朱寨村优质小麦OPT试验		10.8698	17.4275	7.82222	34.0389	45.5666	19.1059
919	Henan	2006-2007洛阳孟津县送庄乡朱寨村优质小麦OPT试验		11.1898	18.0275	8.22222	30.3793	40.5823	16.8176
920	Henan	2006-2007洛阳孟津县送庄乡朱寨村优质小麦OPT试验		11.2653	18.1692	8.31667	31.449	41.9649	17.4883
921	Henan	2006-2007洛阳孟津县送庄乡朱寨村优质小麦OPT试验
922	Henan	2006-2007洛阳孟津县送庄乡朱寨村优质小麦OPT试验
923	Henan	2006-2007洛阳孟津县送庄乡朱寨村优质小麦OPT试验
924	Henan	2006-2007洛阳孟津县送庄乡朱寨村优质小麦OPT试验
925	Henan	2006-2007洛阳孟津县送庄乡朱寨村优质小麦OPT试验
926	Henan	2006-2007洛阳孟津县送庄乡朱寨村优质小麦OPT试验
927	Henan	2006-2007洛阳孟津县送庄乡朱寨村优质小麦OPT试验
928	Henan	2006-2007洛阳孟津县送庄乡朱寨村优质小麦OPT试验
929	Henan	2006-2007洛阳孟津县送庄乡朱寨村优质小麦OPT试验
930	Henan	2006-2007洛阳孟津县送庄乡朱寨村优质小麦OPT试验		7.49611	13.8493	8.89733	24.7672	46.6226	33.2792
931	Henan	2006-2007洛阳孟津县送庄乡朱寨村优质小麦OPT试验		7.12944	12.9693	8.01733	19.5705	36.6097	26.7658
932	Henan	2006-2007洛阳孟津县送庄乡朱寨村优质小麦OPT试验		8.00722	15.076	10.124	22.4756	42.0835	30.4314
933	Henan	2006-2007洛阳孟津县送庄乡朱寨村优质小麦OPT试验
934	Henan	2006-2007洛阳孟津县送庄乡朱寨村优质小麦OPT试验
935	Henan	2006-2007洛阳孟津县送庄乡朱寨村优质小麦OPT试验
936	Henan	2006-2007洛阳孟津县送庄乡朱寨村优质小麦OPT试验
937	Henan	2006-2007洛阳孟津县送庄乡朱寨村优质小麦OPT试验
938	Henan	2006-2007洛阳孟津县送庄乡朱寨村优质小麦OPT试验
939	Henan	2006-2007洛阳孟津县送庄乡朱寨村优质小麦OPT试验
940	Henan	2006-2007洛阳孟津县送庄乡朱寨村优质小麦OPT试验
941	Henan	2006-2007洛阳孟津县送庄乡朱寨村优质小麦OPT试验
942	Henan	2006-2007洛阳孟津县送庄乡朱寨村优质小麦OPT试验
943	Henan	2006-2007洛阳孟津县送庄乡朱寨村优质小麦OPT试验
944	Henan	2006-2007洛阳孟津县送庄乡朱寨村优质小麦OPT试验
945	Henan	2006-2007新乡市延津县司寨乡平陵村优质小麦OPT试验		12.3022	20.0642	10.715	37.9205	53.1638	22.9528
946	Henan	2006-2007新乡市延津县司寨乡平陵村优质小麦OPT试验		12.2756	20.0142	10.6817	33.1792	46.1695	19.8997
947	Henan	2006-2007新乡市延津县司寨乡平陵村优质小麦OPT试验		12.8756	21.1392	11.4317	35.5332	49.7354	21.4415
948	Henan	2006-2007新乡市延津县司寨乡平陵村优质小麦OPT试验
949	Henan	2006-2007新乡市延津县司寨乡平陵村优质小麦OPT试验
950	Henan	2006-2007新乡市延津县司寨乡平陵村优质小麦OPT试验
951	Henan	2006-2007新乡市延津县司寨乡平陵村优质小麦OPT试验
952	Henan	2006-2007新乡市延津县司寨乡平陵村优质小麦OPT试验
953	Henan	2006-2007新乡市延津县司寨乡平陵村优质小麦OPT试验
954	Henan	2006-2007新乡市延津县司寨乡平陵村优质小麦OPT试验
955	Henan	2006-2007新乡市延津县司寨乡平陵村优质小麦OPT试验
956	Henan	2006-2007新乡市延津县司寨乡平陵村优质小麦OPT试验
957	Henan	2006-2007新乡市延津县司寨乡平陵村优质小麦OPT试验
958	Henan	2006-2007新乡市延津县司寨乡平陵村优质小麦OPT试验
959	Henan	2006-2007新乡市延津县司寨乡平陵村优质小麦OPT试验
960	Henan	2007-2008新乡延津县司寨乡平陵村小麦养分吸收规律研究
961	Henan	2007-2008新乡延津县司寨乡平陵村小麦养分吸收规律研究
962	Henan	2007-2008新乡延津县司寨乡平陵村小麦养分吸收规律研究
963	Henan	2007-2008新乡延津县司寨乡平陵村小麦养分吸收规律研究					51.2885
964	Henan	2007-2008新乡延津县司寨乡平陵村小麦养分吸收规律研究					49.1633
965	Henan	2007-2008新乡延津县司寨乡平陵村小麦养分吸收规律研究					57.1601
966	Henan	2007-2008新乡延津县司寨乡平陵村小麦氮肥用量试验
967	Henan	2007-2008新乡延津县司寨乡平陵村小麦氮肥用量试验
968	Henan	2007-2008新乡延津县司寨乡平陵村小麦氮肥用量试验
969	Henan	2007-2008新乡延津县司寨乡平陵村小麦氮肥用量试验					39.4526
970	Henan	2007-2008新乡延津县司寨乡平陵村小麦氮肥用量试验					43.7886
971	Henan	2007-2008新乡延津县司寨乡平陵村小麦氮肥用量试验					47.129
972	Henan	2007-2008新乡延津县司寨乡平陵村小麦氮肥用量试验					40.6968
973	Henan	2007-2008新乡延津县司寨乡平陵村小麦氮肥用量试验					43.2424
974	Henan	2007-2008新乡延津县司寨乡平陵村小麦氮肥用量试验					44.8228
975	Henan	2007-2008新乡延津县司寨乡平陵村小麦氮肥用量试验					34.9048
976	Henan	2007-2008新乡延津县司寨乡平陵村小麦氮肥用量试验					36.6292
977	Henan	2007-2008新乡延津县司寨乡平陵村小麦氮肥用量试验					38.7442
978	Henan	2007-2008新乡延津县司寨乡平陵村小麦氮肥用量试验					29.7779
979	Henan	2007-2008新乡延津县司寨乡平陵村小麦氮肥用量试验					30.8165
980	Henan	2007-2008新乡延津县司寨乡平陵村小麦氮肥用量试验					33.5817
981	Henan	2007-2008新乡延津县司寨乡平陵村小麦氮肥用量试验					29.5613
982	Henan	2007-2008新乡延津县司寨乡平陵村小麦氮肥用量试验					31.5352
983	Henan	2007-2008新乡延津县司寨乡平陵村小麦氮肥用量试验					33.3406
984	Henan	2007-2008驻马店驿城区水屯镇新坡村冬小麦OPT定位试验		9.34667	17.3143	8.02857	28.8417	45.6455	67.1142
985	Henan	2007-2008驻马店驿城区水屯镇新坡村冬小麦OPT定位试验		10.3867	19.5429	10.2571	37.02	47.9731	69.8586
986	Henan	2007-2008驻马店驿城区水屯镇新坡村冬小麦OPT定位试验		11.0667	21	11.7143	43.4743		71.4158
987	Henan	2007-2008驻马店驿城区水屯镇新坡村冬小麦OPT定位试验
988	Henan	2007-2008驻马店驿城区水屯镇新坡村冬小麦OPT定位试验
989	Henan	2007-2008驻马店驿城区水屯镇新坡村冬小麦OPT定位试验
990	Henan	2007-2008驻马店驿城区水屯镇新坡村冬小麦OPT定位试验
991	Henan	2007-2008驻马店驿城区水屯镇新坡村冬小麦OPT定位试验
992	Henan	2007-2008驻马店驿城区水屯镇新坡村冬小麦OPT定位试验
993	Henan	2007-2008驻马店驿城区水屯镇新坡村冬小麦OPT定位试验
994	Henan	2007-2008驻马店驿城区水屯镇新坡村冬小麦OPT定位试验
995	Henan	2007-2008驻马店驿城区水屯镇新坡村冬小麦OPT定位试验
996	Henan	2007-2008驻马店驿城区水屯镇新坡村冬小麦OPT定位试验
997	Henan	2007-2008驻马店驿城区水屯镇新坡村冬小麦OPT定位试验
998	Henan	2007-2008驻马店驿城区水屯镇新坡村冬小麦OPT定位试验
999	Henan	2007-2008驻马店驿城区水屯镇新坡村冬小麦OPT定位试验
1000	Henan	2007-2008驻马店驿城区水屯镇新坡村冬小麦OPT定位试验
1001	Henan	2007-2008驻马店驿城区水屯镇新坡村冬小麦OPT定位试验
1002	Henan	2007-2008新乡延津县司寨乡平陵村冬小麦OPT定位试验		12.8095	12.5495	10.7429	39.496	39.7012	66.6628
1003	Henan	2007-2008新乡延津县司寨乡平陵村冬小麦OPT定位试验		13.7286	14.3876	12.581	48.1642	40.5104	82.4468
1004	Henan	2007-2008新乡延津县司寨乡平陵村冬小麦OPT定位试验		14.4524	15.8352	14.0286	55.5611		84.0117
1005	Henan	2007-2008新乡延津县司寨乡平陵村冬小麦OPT定位试验
1006	Henan	2007-2008新乡延津县司寨乡平陵村冬小麦OPT定位试验
1007	Henan	2007-2008新乡延津县司寨乡平陵村冬小麦OPT定位试验
1008	Henan	2007-2008新乡延津县司寨乡平陵村冬小麦OPT定位试验
1009	Henan	2007-2008新乡延津县司寨乡平陵村冬小麦OPT定位试验
1010	Henan	2007-2008新乡延津县司寨乡平陵村冬小麦OPT定位试验
1011	Henan	2007-2008新乡延津县司寨乡平陵村冬小麦OPT定位试验
1012	Henan	2007-2008新乡延津县司寨乡平陵村冬小麦OPT定位试验
1013	Henan	2007-2008新乡延津县司寨乡平陵村冬小麦OPT定位试验
1014	Henan	2007-2008新乡延津县司寨乡平陵村冬小麦OPT定位试验
1015	Henan	2007-2008新乡延津县司寨乡平陵村冬小麦OPT定位试验
1016	Henan	2007-2008新乡延津县司寨乡平陵村冬小麦OPT定位试验
1017	Henan	2007-2008新乡延津县司寨乡平陵村冬小麦OPT定位试验
1018	Henan	2007-2008新乡延津县司寨乡平陵村冬小麦OPT定位试验
1019	Henan	2007-2008新乡延津县司寨乡平陵村冬小麦OPT定位试验
1020	Henan	2007-2008驻马店农科所小麦轮作体系养分需求与供应同步机制研究
1021	Henan	2007-2008驻马店农科所小麦轮作体系养分需求与供应同步机制研究
1022	Henan	2007-2008驻马店农科所小麦轮作体系养分需求与供应同步机制研究
1023	Henan	2007-2008驻马店农科所小麦轮作体系养分需求与供应同步机制研究				5.81786
1024	Henan	2007-2008驻马店农科所小麦轮作体系养分需求与供应同步机制研究				3.94881
1025	Henan	2007-2008驻马店农科所小麦轮作体系养分需求与供应同步机制研究				0.94881
1026	Henan	2007-2008驻马店农科所小麦轮作体系养分需求与供应同步机制研究				7.45429
1027	Henan	2007-2008驻马店农科所小麦轮作体系养分需求与供应同步机制研究				5.79714
1028	Henan	2007-2008驻马店农科所小麦轮作体系养分需求与供应同步机制研究				4.74			4.21647
1029	Henan	2007-2008驻马店农科所小麦轮作体系养分需求与供应同步机制研究
1030	Henan	2007-2008驻马店农科所小麦轮作体系养分需求与供应同步机制研究
1031	Henan	2007-2008驻马店农科所小麦轮作体系养分需求与供应同步机制研究
1032	Henan	2007-2008驻马店农科所小麦轮作体系养分需求与供应同步机制研究				6.46071
1033	Henan	2007-2008驻马店农科所小麦轮作体系养分需求与供应同步机制研究				4.6631
1034	Henan	2007-2008驻马店农科所小麦轮作体系养分需求与供应同步机制研究				1.73452
1035	Henan	2007-2008驻马店农科所小麦轮作体系养分需求与供应同步机制研究				8.75905			1.49838
1036	Henan	2007-2008驻马店农科所小麦轮作体系养分需求与供应同步机制研究				7.07333
1037	Henan	2007-2008驻马店农科所小麦轮作体系养分需求与供应同步机制研究				5.16857			9.29544
1038	Henan	2007-2008驻马店农科所小麦轮作体系养分需求与供应同步机制研究
1039	Henan	2007-2008驻马店农科所小麦轮作体系养分需求与供应同步机制研究
1040	Henan	2007-2008驻马店农科所小麦轮作体系养分需求与供应同步机制研究
1041	Henan	2007-2008驻马店农科所小麦轮作体系养分需求与供应同步机制研究				6.75			0.259878
1042	Henan	2007-2008驻马店农科所小麦轮作体系养分需求与供应同步机制研究				4.39286
1043	Henan	2007-2008驻马店农科所小麦轮作体系养分需求与供应同步机制研究				1.17857			9.57609
1044	Henan	2007-2008驻马店农科所小麦轮作体系养分需求与供应同步机制研究				8.3619			7.40014
1045	Henan	2007-2008驻马店农科所小麦轮作体系养分需求与供应同步机制研究				6.68571			4.41404
1046	Henan	2007-2008驻马店农科所小麦轮作体系养分需求与供应同步机制研究				5.53333			13.8343
1047	Henan	2007-2008驻马店农科所小麦轮作体系养分需求与供应同步机制研究
1048	Henan	2007-2008驻马店农科所小麦轮作体系养分需求与供应同步机制研究
1049	Henan	2007-2008驻马店农科所小麦轮作体系养分需求与供应同步机制研究
1110	Henan	2007-2008新乡延津县司寨乡平陵村氮肥不同基追比对小麦养分需求与供应的影响
1111	Henan	2007-2008新乡延津县司寨乡平陵村氮肥不同基追比对小麦养分需求与供应的影响
1112	Henan	2007-2008新乡延津县司寨乡平陵村氮肥不同基追比对小麦养分需求与供应的影响
1113	Henan	2007-2008新乡延津县司寨乡平陵村氮肥不同基追比对小麦养分需求与供应的影响		2.96444			17.0657
1114	Henan	2007-2008新乡延津县司寨乡平陵村氮肥不同基追比对小麦养分需求与供应的影响		3.69333			16.5264
1115	Henan	2007-2008新乡延津县司寨乡平陵村氮肥不同基追比对小麦养分需求与供应的影响		4.28			21.5344
1116	Henan	2007-2008新乡延津县司寨乡平陵村氮肥不同基追比对小麦养分需求与供应的影响		5.4			24.6164
1117	Henan	2007-2008新乡延津县司寨乡平陵村氮肥不同基追比对小麦养分需求与供应的影响		6.03111			23.2059
1118	Henan	2007-2008新乡延津县司寨乡平陵村氮肥不同基追比对小麦养分需求与供应的影响		7.01333			29.491
1119	Henan	2007-2008新乡延津县司寨乡平陵村氮肥不同基追比对小麦养分需求与供应的影响		10.6844			40.3284
1120	Henan	2007-2008新乡延津县司寨乡平陵村氮肥不同基追比对小麦养分需求与供应的影响		11.5378			38.519
1121	Henan	2007-2008新乡延津县司寨乡平陵村氮肥不同基追比对小麦养分需求与供应的影响		12.2044			47.0842
1122	Henan	2007-2008新乡延津县司寨乡平陵村氮肥不同基追比对小麦养分需求与供应的影响		8.68			31.6209
1123	Henan	2007-2008新乡延津县司寨乡平陵村氮肥不同基追比对小麦养分需求与供应的影响		9.05778			32.7792
1124	Henan	2007-2008新乡延津县司寨乡平陵村氮肥不同基追比对小麦养分需求与供应的影响		9.58222			34.4414
1125	Henan	2007-2008新乡延津县司寨乡平陵村钾肥不同基追比对小麦养分需求与供应的影响
1126	Henan	2007-2008新乡延津县司寨乡平陵村钾肥不同基追比对小麦养分需求与供应的影响
1127	Henan	2007-2008新乡延津县司寨乡平陵村钾肥不同基追比对小麦养分需求与供应的影响
1128	Henan	2007-2008新乡延津县司寨乡平陵村钾肥不同基追比对小麦养分需求与供应的影响				11.721			24.9466
1129	Henan	2007-2008新乡延津县司寨乡平陵村钾肥不同基追比对小麦养分需求与供应的影响				12.7114			25.4473
1130	Henan	2007-2008新乡延津县司寨乡平陵村钾肥不同基追比对小麦养分需求与供应的影响				13.6257			26.0901
1131	Henan	2007-2008新乡延津县司寨乡平陵村钾肥不同基追比对小麦养分需求与供应的影响				14.3495			33.2457
1132	Henan	2007-2008新乡延津县司寨乡平陵村钾肥不同基追比对小麦养分需求与供应的影响				14.9495			29.0003
1133	Henan	2007-2008新乡延津县司寨乡平陵村钾肥不同基追比对小麦养分需求与供应的影响				15.721			34.7948
1134	Henan	2007-2008新乡延津县司寨乡平陵村钾肥不同基追比对小麦养分需求与供应的影响				16.6543			34.8218
1135	Henan	2007-2008新乡延津县司寨乡平陵村钾肥不同基追比对小麦养分需求与供应的影响				17.74			34.6412
1136	Henan	2007-2008新乡延津县司寨乡平陵村钾肥不同基追比对小麦养分需求与供应的影响				18.5781			35.998
1137	Henan	2006-2007驻马店市遂平县和兴乡和兴村优质小麦OPT试验		9.73644	15.0642	8.61833	31.9897	43.611	20.4446
1138	Henan	2006-2007驻马店市遂平县和兴乡和兴村优质小麦OPT试验		10.0698	15.6892	9.035	28.5035	38.6275	18.2115
1139	Henan	2006-2007驻马店市遂平县和兴乡和兴村优质小麦OPT试验		10.4164	16.3392	9.46833	30.1832	41.0412	19.2735
1140	Henan	2006-2007驻马店市遂平县和兴乡和兴村优质小麦OPT试验
1141	Henan	2006-2007驻马店市遂平县和兴乡和兴村优质小麦OPT试验
1142	Henan	2006-2007驻马店市遂平县和兴乡和兴村优质小麦OPT试验
1143	Henan	2006-2007驻马店市遂平县和兴乡和兴村优质小麦OPT试验
1144	Henan	2006-2007驻马店市遂平县和兴乡和兴村优质小麦OPT试验
1145	Henan	2006-2007驻马店市遂平县和兴乡和兴村优质小麦OPT试验
1146	Henan	2006-2007驻马店市遂平县和兴乡和兴村优质小麦OPT试验
1147	Henan	2006-2007驻马店市遂平县和兴乡和兴村优质小麦OPT试验
1148	Henan	2006-2007驻马店市遂平县和兴乡和兴村优质小麦OPT试验
1149	Henan	2006-2007驻马店市遂平县和兴乡和兴村优质小麦OPT试验		7.79056	16.4307	11.7067	25.3355	50.7502	36.4715
1150	Henan	2006-2007驻马店市遂平县和兴乡和兴村优质小麦OPT试验		8.37389	17.8307	13.1067	22.2077	44.9754	32.5196
1151	Henan	2006-2007驻马店市遂平县和兴乡和兴村优质小麦OPT试验		8.80167	18.8573	14.1333	24.1245	48.5281	34.9687
1152	Henan	2006-2007驻马店市遂平县和兴乡和兴村优质小麦OPT试验
1153	Henan	2006-2007驻马店市遂平县和兴乡和兴村优质小麦OPT试验
1154	Henan	2006-2007驻马店市遂平县和兴乡和兴村优质小麦OPT试验
1155	Henan	2006-2007驻马店市遂平县和兴乡和兴村优质小麦OPT试验
1156	Henan	2006-2007驻马店市遂平县和兴乡和兴村优质小麦OPT试验
1157	Henan	2006-2007驻马店市遂平县和兴乡和兴村优质小麦OPT试验
1158	Henan	2006-2007驻马店市遂平县和兴乡和兴村优质小麦OPT试验
1159	Henan	2006-2007驻马店市遂平县和兴乡和兴村优质小麦OPT试验
1160	Henan	2006-2007驻马店市遂平县和兴乡和兴村优质小麦OPT试验
1161	Henan	2006-2007驻马店市遂平县和兴乡和兴村优质小麦OPT试验
1162	Henan	2006-2007驻马店市遂平县和兴乡和兴村优质小麦OPT试验
1163	Henan	2006-2007驻马店市遂平县和兴乡和兴村优质小麦OPT试验
1164	Henan	2006-2007驻马店市驿城区水屯镇新坡村优质小麦OPT试验		9.14089	14.3667	8.39611	29.3869	38.9909	18.6305
1165	Henan	2006-2007驻马店市驿城区水屯镇新坡村优质小麦OPT试验		8.68756	13.5167	7.82944	24.3005	31.8751	15.4422
1166	Henan	2006-2007驻马店市驿城区水屯镇新坡村优质小麦OPT试验		9.07867	14.25	8.31833	26.038	34.2916	16.508
1167	Henan	2006-2007驻马店市驿城区水屯镇新坡村优质小麦OPT试验
1168	Henan	2006-2007驻马店市驿城区水屯镇新坡村优质小麦OPT试验
1169	Henan	2006-2007驻马店市驿城区水屯镇新坡村优质小麦OPT试验
1170	Henan	2006-2007驻马店市驿城区水屯镇新坡村优质小麦OPT试验
1171	Henan	2006-2007驻马店市驿城区水屯镇新坡村优质小麦OPT试验
1172	Henan	2006-2007驻马店市驿城区水屯镇新坡村优质小麦OPT试验
1173	Henan	2006-2007驻马店市驿城区水屯镇新坡村优质小麦OPT试验
1174	Henan	2006-2007驻马店市驿城区水屯镇新坡村优质小麦OPT试验
1175	Henan	2006-2007驻马店市驿城区水屯镇新坡村优质小麦OPT试验
1176	Henan	2006-2007驻马店市驿城区水屯镇新坡村优质小麦OPT试验		6.27611	9.19067	7.72933	20.8115	36.6698	29.7796
1177	Henan	2006-2007驻马店市驿城区水屯镇新坡村优质小麦OPT试验		5.95944	8.43067	6.96933	16.0142	27.9294	23.9632
1178	Henan	2006-2007驻马店市驿城区水屯镇新坡村优质小麦OPT试验		6.88722	10.6573	9.196	18.9432	33.1616	27.4677
1179	Henan	2006-2007驻马店市驿城区水屯镇新坡村优质小麦OPT试验
1180	Henan	2006-2007驻马店市驿城区水屯镇新坡村优质小麦OPT试验
1181	Henan	2006-2007驻马店市驿城区水屯镇新坡村优质小麦OPT试验
1182	Henan	2006-2007驻马店市驿城区水屯镇新坡村优质小麦OPT试验
1183	Henan	2006-2007驻马店市驿城区水屯镇新坡村优质小麦OPT试验
1184	Henan	2006-2007驻马店市驿城区水屯镇新坡村优质小麦OPT试验
1185	Henan	2006-2007驻马店市驿城区水屯镇新坡村优质小麦OPT试验
1186	Henan	2006-2007驻马店市驿城区水屯镇新坡村优质小麦OPT试验
1187	Henan	2006-2007驻马店市驿城区水屯镇新坡村优质小麦OPT试验
1188	Henan	2006-2007驻马店市驿城区水屯镇新坡村优质小麦OPT试验
1189	Henan	2006-2007驻马店市驿城区水屯镇新坡村优质小麦OPT试验
1190	Henan	2006-2007驻马店市驿城区水屯镇新坡村优质小麦OPT试验
1191	Henan	2009-2010新乡小麦OPT试验		12.4831	16.27	10.65	44.3371	25.6514	18.6908
1192	Henan	2009-2010新乡小麦OPT试验		11.0876	12.7811	8.03333	44.857	32.9968	17.6808
1193	Henan	2009-2010新乡小麦OPT试验		12.8342	17.1478	11.3083	51.8347	43.6532	23.2036
1194	Henan	2009-2010新乡小麦OPT试验
1195	Henan	2009-2010新乡小麦OPT试验
1196	Henan	2009-2010新乡小麦OPT试验
1197	Henan	2009-2010新乡小麦OPT试验
1198	Henan	2009-2010新乡小麦OPT试验
1199	Henan	2009-2010新乡小麦OPT试验
1200	Henan	2009-2010新乡小麦OPT试验
1201	Henan	2009-2010新乡小麦OPT试验
1202	Henan	2009-2010新乡小麦OPT试验
1203	Henan	2009-2010新乡小麦OPT试验
1204	Henan	2009-2010新乡小麦OPT试验
1205	Henan	2009-2010新乡小麦OPT试验
1206	Henan	2009-2010新乡小麦OPT试验
1207	Henan	2009-2010新乡小麦OPT试验
1208	Henan	2009-2010新乡小麦OPT试验
1209	Henan	2009-2010洛阳孟津小麦OPT试验		10.7142	17.425	6.7	35.3625	26.9012	10.0095
1210	Henan	2009-2010洛阳孟津小麦OPT试验		9.35422	14.875	5	35.6053	33.8416	9.31163
1211	Henan	2009-2010洛阳孟津小麦OPT试验		11.052	18.0583	7.12222	41.6037	39.9629	12.4422
1212	Henan	2009-2010洛阳孟津小麦OPT试验
1213	Henan	2009-2010洛阳孟津小麦OPT试验
1214	Henan	2009-2010洛阳孟津小麦OPT试验
1215	Henan	2009-2010洛阳孟津小麦OPT试验
1216	Henan	2009-2010洛阳孟津小麦OPT试验
1217	Henan	2009-2010洛阳孟津小麦OPT试验
1218	Henan	2009-2010洛阳孟津小麦OPT试验
1219	Henan	2009-2010洛阳孟津小麦OPT试验
1220	Henan	2009-2010洛阳孟津小麦OPT试验
1221	Henan	2009-2010洛阳孟津小麦OPT试验
1222	Henan	2009-2010洛阳孟津小麦OPT试验
1223	Henan	2009-2010洛阳孟津小麦OPT试验
1224	Henan	2009-2010洛阳孟津小麦OPT试验
1225	Henan	2009-2010洛阳孟津小麦OPT试验
1226	Henan	2009-2010洛阳孟津小麦OPT试验
1227	Henan	2009-2010驻马店市水屯小麦OPT试验		16.0978	15.2717	13.0411	45.7942	22.4842	17.4305
1228	Henan	2009-2010驻马店市水屯小麦OPT试验		14.6978	10.0217	9.54111	46.07	32.9079	16.0718
1229	Henan	2009-2010驻马店市水屯小麦OPT试验		16.4489	16.5883	13.9189	52.0717	32.2596	22.3495
1230	Henan	2009-2010驻马店市水屯小麦OPT试验
1231	Henan	2009-2010驻马店市水屯小麦OPT试验
1232	Henan	2009-2010驻马店市水屯小麦OPT试验
1233	Henan	2009-2010驻马店市水屯小麦OPT试验
1234	Henan	2009-2010驻马店市水屯小麦OPT试验
1235	Henan	2009-2010驻马店市水屯小麦OPT试验
1236	Henan	2009-2010驻马店市水屯小麦OPT试验
1237	Henan	2009-2010驻马店市水屯小麦OPT试验
1238	Henan	2009-2010驻马店市水屯小麦OPT试验
1239	Henan	2009-2010驻马店市水屯小麦OPT试验
1240	Henan	2009-2010驻马店市水屯小麦OPT试验
1241	Henan	2009-2010驻马店市水屯小麦OPT试验
1242	Henan	2009-2010驻马店市水屯小麦OPT试验
1243	Henan	2009-2010驻马店市水屯小麦OPT试验
1244	Henan	2009-2010驻马店市水屯小麦OPT试验
1245	Henan	2009-2010驻马店水屯小麦氮肥用量试验
1246	Henan	2009-2010驻马店水屯小麦氮肥用量试验
1247	Henan	2009-2010驻马店水屯小麦氮肥用量试验
1248	Henan	2009-2010驻马店水屯小麦氮肥用量试验
1249	Henan	2009-2010驻马店水屯小麦氮肥用量试验
1250	Henan	2009-2010驻马店水屯小麦氮肥用量试验
1251	Henan	2009-2010驻马店水屯小麦氮肥用量试验		17			63.2263
1252	Henan	2009-2010驻马店水屯小麦氮肥用量试验		22.4667			80.324
1253	Henan	2009-2010驻马店水屯小麦氮肥用量试验		23.2533			77.9218
1254	Henan	2009-2010驻马店水屯小麦氮肥用量试验		20.1933			77.8294
1255	Henan	2009-2010驻马店水屯小麦氮肥用量试验		22.1867			82.2678
1256	Henan	2009-2010驻马店水屯小麦氮肥用量试验		21.1867			78.1867
1257	Henan	2009-2010驻马店水屯小麦氮肥用量试验		14.2622			56.5115
1258	Henan	2009-2010驻马店水屯小麦氮肥用量试验		16			60.2643
1259	Henan	2009-2010驻马店水屯小麦氮肥用量试验		16.6933			61.019
1260	Henan	2009-2010驻马店水屯小麦氮肥用量试验		9.81667			37.584
1261	Henan	2009-2010驻马店水屯小麦氮肥用量试验		10.8			39.7622
1262	Henan	2009-2010驻马店水屯小麦氮肥用量试验		10.3067			37.7279
1263	Henan	2009-2010新乡平陵小麦氮素基施的条件试验
1264	Henan	2009-2010新乡平陵小麦氮素基施的条件试验
1265	Henan	2009-2010新乡平陵小麦氮素基施的条件试验
1266	Henan	2009-2010新乡平陵小麦氮素基施的条件试验
1267	Henan	2009-2010新乡平陵小麦氮素基施的条件试验		16.875			63.4662
1268	Henan	2009-2010新乡平陵小麦氮素基施的条件试验		13.9375			54.3006
1269	Henan	2009-2010新乡平陵小麦氮素基施的条件试验		15.4125			54.5319
1270	Henan	2009-2010新乡平陵小麦氮素基施的条件试验		18.35			64.847
1271	Henan	2009-2010新乡平陵小麦氮素基施的条件试验		20.2917			83.8579
1272	Henan	2009-2010新乡平陵小麦氮素基施的条件试验		17.9667			73.6761
1273	Henan	2009-2010新乡平陵小麦氮素基施的条件试验		19.1333			76.5655
1274	Henan	2009-2010新乡平陵小麦氮素基施的条件试验		21.45			84.9195
1275	Henan	2009-2010新乡平陵小麦氮素基施的条件试验		15.0583			60.9689
1276	Henan	2009-2010新乡平陵小麦氮素基施的条件试验		12.9417			52.0162
1277	Henan	2009-2010新乡平陵小麦氮素基施的条件试验		14			54.5798
1278	Henan	2009-2010新乡平陵小麦氮素基施的条件试验		16.1083			61.9504
1279	Henan	2009-2010新乡平陵小麦氮素基施的条件试验		16.6056			69.9133
1280	Henan	2009-2010新乡平陵小麦氮素基施的条件试验		14.9333			61.7016
1281	Henan	2009-2010新乡平陵小麦氮素基施的条件试验		15.7667			62.7034
1282	Henan	2009-2010新乡平陵小麦氮素基施的条件试验		17.4389			70.8346
1283	Henan	2009-2010新乡平陵小麦氮素基施的条件试验		14.6937			61.9877
1284	Henan	2009-2010新乡平陵小麦氮素基施的条件试验		12.9688			53.6856
1285	Henan	2009-2010新乡平陵小麦氮素基施的条件试验		13.8313			54.7355
1286	Henan	2009-2010新乡平陵小麦氮素基施的条件试验		15.55			62.9131
1287	Henan	2009-2010新乡平陵小麦氮素基施的条件试验		15.3708			64.9828
1288	Henan	2009-2010新乡平陵小麦氮素基施的条件试验		14.0042			58.0952
1289	Henan	2009-2010新乡平陵小麦氮素基施的条件试验		14.6875			58.921
1290	Henan	2009-2010新乡平陵小麦氮素基施的条件试验		16.0542			65.769
1291	Henan	2009-2010新乡平陵小麦氮素基施的条件试验		15.595			24.7979
1292	Henan	2009-2010新乡平陵小麦氮素基施的条件试验		14.06			22.0718
1293	Henan	2009-2010新乡平陵小麦氮素基施的条件试验		14.82			24.939
1294	Henan	2009-2010新乡平陵小麦氮素基施的条件试验		16.345			27.5538
1295	Henan	2009-2010新乡平陵小麦氮素基施的条件试验		14			60.4884
1296	Henan	2009-2010新乡平陵小麦氮素基施的条件试验		12.6833			53.8586
1297	Henan	2009-2010新乡平陵小麦氮素基施的条件试验		13.3375			54.6334
1298	Henan	2009-2010新乡平陵小麦氮素基施的条件试验		14.6458			61.2531
1299	Henan	2009-2010新乡平陵小麦氮素基施的条件试验
1300	Henan	2009-2010新乡平陵小麦氮素基施的条件试验
1301	Henan	2009-2010新乡平陵小麦氮素基施的条件试验
1302	Henan	2009-2010新乡平陵小麦氮素基施的条件试验
	Henan
	Henan
	Henan	高产冬小麦需肥规律研究
	Henan
	Henan
	Henan
	Henan
	Henan			2.21238	7.17333	2.09	82.0429
	Henan
	Henan
	Henan
	Henan				0.166667		50.8444
	Henan
	Henan
	Henan
	Henan
	Henan			4.76095	2.27444	12.2483	45.3143	31.3867
	Henan
	Henan
	Henan
	Henan			3.22222	2.11111		11.263	24.3355
	Henan
	Henan
	Henan
	Henan
	Henan			4.07429	6.66333	13.0783		30.2921
	Henan
	Henan
	Henan
	Henan				3.72222		30.6889	14.1024
	Henan
	Henan
	Henan
	Henan
159	Hebei	2002年辛集钾肥定位试验（冬小麦）
163	Hebei	2002年辛集钾肥定位试验（冬小麦）				4.33333
167	Hebei	2002年辛集钾肥定位试验（冬小麦）				4.33333			21.1038
171	Hebei	2002年辛集钾肥定位试验（冬小麦）
199	Hebei	2003年辛集钾肥定位试验（冬小麦）
203	Hebei	2003年辛集钾肥定位试验（冬小麦）				1.73333			5.78349
207	Hebei	2003年辛集钾肥定位试验（冬小麦）				1.93333			9.65774
211	Hebei	2003年辛集钾肥定位试验（冬小麦）
278	Hebei	2004年辛集钾肥定位试验（冬小麦）
282	Hebei	2004年辛集钾肥定位试验（冬小麦）				4.5
286	Hebei	2004年辛集钾肥定位试验（冬小麦）				3.6			43.4656
290	Hebei	2004年辛集钾肥定位试验（冬小麦）
472	Hebei	2007年河北辛集冬小麦养分限制因子研究试验		11.5278			20.1419	1.25409
473	Hebei	2007年河北辛集冬小麦养分限制因子研究试验		4.16667			10.7563	19.4433
474	Hebei	2007年河北辛集冬小麦养分限制因子研究试验		10.1389		14.3333	44.497	14.7636
475	Hebei	2007年河北辛集冬小麦养分限制因子研究试验
476	Hebei	2007年河北辛集冬小麦养分限制因子研究试验
477	Hebei	2007年河北辛集冬小麦养分限制因子研究试验
478	Hebei	2007年河北辛集冬小麦养分限制因子研究试验
479	Hebei	2007年河北辛集冬小麦养分限制因子研究试验
480	Hebei	2007年河北辛集冬小麦养分限制因子研究试验
481	Hebei	2007年河北辛集冬小麦养分限制因子研究试验
482	Hebei	2007年河北辛集冬小麦养分限制因子研究试验
483	Hebei	2007年河北辛集冬小麦养分限制因子研究试验
484	Hebei	2007年河北辛集冬小麦养分限制因子研究试验
485	Hebei	2007年河北辛集冬小麦养分限制因子研究试验
486	Hebei	2007年河北辛集冬小麦养分限制因子研究试验
487	Hebei	2007年河北辛集冬小麦养分限制因子研究试验
488	Hebei	2007年河北辛集冬小麦养分限制因子研究试验
489	Hebei	2007年河北辛集冬小麦养分限制因子研究试验
495	Hebei	2009年河北辛集冬小麦氮肥不同用量研究总结
501	Hebei	2009年河北辛集冬小麦氮肥不同用量研究总结
[truncated: 2,604 more rows]
