# Supplementary material for: Agronomic Characteristics Related to Grain Yield and Nutrient Use Efficiency for Wheat Production in China
Source: PLoS One. 2016 Sep 15;11(9):e0162802. doi: 10.1371/journal.pone.0162802 (PMC5025147; doi:10.1371/journal.pone.0162802)
Supplement: S3 Fig — (XLSX) [file pone.0162802.s003.xlsx]

## Sheet: data for YHRV
No.	data source	Treatments		Grain yield	FN	FP（P2O5）	FK（K2O）
1	Hebei province
23	裴雪霞，王秀斌，何萍，张秀芝，李科江，周卫，梁国庆，金继运	氮肥后移对壤氮素供应和冬小麦氮素吸收利用的影响
24		N0		5853	0	150	90
25		N300/2		6366	300	150	90
26		N210/2		6265	210	150	90
27		N210/3		6429	210	150	90
28		N210/4		6187	210	150	90
152	Henan province
193	李丙奇，孙克刚，和爱玲，张欣	潮土区氮肥运筹对小麦产量和氮肥利用率的影响
194		T1		5396	0	90	90
195		T2		6216	225	90	90
196		T3		6779	225	90	90
197		T4		7978	225	90	90
198		T5		7445	225	90	90
199		T6		7796	180	90	90
200		T7		8070	180	105	60
201	王桂良,黄玉芳,叶优良	不同钾肥品种和用量对小麦产量品质和养分吸收利用的影响
202	钾肥品种试验	0		5578.5	180	90	0
203		俄罗斯产 KCl		6331.9	180	90	90
204		罗布泊产 K2SO4		6489.1	180	90	90
205		开封产 K2SO4		6163.6	180	90	90
206		俄罗斯产 K2SO4		5969.8	180	90	90
207		罗布泊产K2SO4		6439.6	180	90	45
208		罗布泊产		7006.8	180	90	135
209		罗布泊产K2SO4		6590.1	180	90	180
210		罗布泊产 K2SO4		6302.6	180	90	225
211	王桂良 叶优良	超高产小麦干物质累积、氮素营养及诊断研究
212	温县	N0		8523.4	0	135	135
213		N90		8786.7	90	135	135
214		N180		9228.5	180	135	135
215		N270		9523	270	135	135
216		N360		8934	360	135	135
217	兰考	N0		8946.7	0	135	135
218		N90		9200	90	135	135
219		N180		9737.3	180	135	135
220		N270		9866.7	270	135	135
221		N360		9506.7	360	135	135
222	温县	N0		8671.7	0	135	135
223		N90		8955.9	90	135	135
224		N180		9258.4	180	135	135
225		N270		9120.9	270	135	135
226		N360		9075	360	135	135
227	兰考	N0		8940	0	135	135
228		N90		9093.4	90	135	135
229		N180		9831.7	180	135	135
230		N270		9593.4	270	135	135
231		N360		9306.7	360	135	135
277	苗玉红 谭金芳	两个超高产小麦品种钾素营养差异性研究
278	温麦6号	钾水平0/mu		7963.26	240	150	0
279		5		8768.51	240	150	75
280		10		8987.91	240	150	150
281		15		9287.25	240	150	225
282		20		9046.95	240	150	300
283	兰考906-4	钾水平0		6619.5	240	150	0
284		5		7234.5	240	150	75
285		10		7615.5	240	150	150
286		15		8074.57	240	150	225
287		20		7692.18	240	150	300
294	逯怀森,董根中,肖伟强,卢浩坡,宁金星,尚巧平	施钾对旱地小麦养分变化的影响
295		基施75	有机肥46 500 kg·hm	5536.5	135	67.5	75
296		基施150	有机肥46 501 kg·hm	5689.5	135	67.5	150
297		苗期75	有机肥46 502 kg·hm	5614.5	135	67.5	75
298		拔节期75	有机肥46 503 kg·hm	5332.5	135	67.5	75
299		孕穗期75	有机肥46 504 kg·hm	5661	135	67.5	75
300		CK	有机肥46 505 kg·hm	5119.5	135	67.5	0
301	赵鹏 陈阜	豫北秸秆还田配施氮肥对冬小麦氮利用及土壤硝态氮的短期效应
302		N0		5746	0	90	75
303		N90		6365	90	90	75
304		N180		7080	180	90	75
305		N270		7465	270	90	75
306		N360		7260	360	90	75
307		S+N0		5535	0	90	75
308		S+N90		6815	90	90	75
309		S+N180		7675	180	90	75
310		S+N270		8290	270	90	75
311		S+N360		8003	360	90	75
351	郭天财,宋 晓,马冬云,冯 伟,王永华	施氮水平对2种穗型冬小麦品种产量及氮素吸收利用的影响
352		兰考矮早八	N0	6976.9	0	150	75
353			N1	7733.2	90	150	75
354			N2	8602.9	180	150	75
355			N3	8299.5	360	150	75
356
357		豫麦49-198	N0	7409.9	0	150	75
358			N1	8302.4	90	150	75
359			N2	9415.9	180	150	75
360			N3	8854.3	360	150	75
391	唐旭 马义兵	小麦-玉米轮作土壤磷素长期演变规律研究
392		郑州	CK	1861
393		1991-2005	N	2257
394			NP	2760
395			NK	5984
396			NPK	6215
397			NPKM	5981		101.8
398			NPKSt	5674		70.1
399	Shanxi province
400	李廷亮1，谢英荷	施肥和覆膜垄沟种植对旱地小麦产量及水氮利用的影响
401		旋地平作		1599.34	0	120	0
402		旋地平作		1802.3	127.5	120	0
403		旋地平作		1917.63	165	120	0
404		旋地平作		2052.88	195	120	0
405		覆膜垄沟		2013.65	165	120	0
406	裴雪霞,王姣爱,党建友,张定一	小麦氮素吸收利用的基因型差异研究
407	品种试验	晋麦31		5954.57	0	135	165
408		晋麦47		6236.71	0	135	165
409		晋麦54		6101.79	0	135	165
410		晋麦60		5624.22	0	135	165
411		晋麦65		6470.29	0	135	165
412		晋麦71		4848.9	0	135	165
413		晋麦72		5425.14	0	135	165
414		临丰615		5661.85	0	135	165
415		临优145		5260.58	0	135	165
416		临汾138		6178.27	0	135	165
417		临汾5064		5120.29	0	135	165
418		临选2039		5421.85	0	135	165
419		临选2098		6099.54	0	135	165
420		济南17		5435.9	0	135	165
421		陕225		5866.13	0	135	165
422		小偃54		4239.54	0	135	165
423		晋麦31		6185.78	225	135	165
424		晋麦47		7266.94	225	135	165
425		晋麦54		6885.26	225	135	165
426		晋麦60		6772.02	225	135	165
427		晋麦65		6664.34	225	135	165
428		晋麦71		6547.28	225	135	165
429		晋麦72		6186.42	225	135	165
430		临丰615		6346.59	225	135	165
431		临优145		5361.85	225	135	165
432		临汾138		6409.48	225	135	165
433		临汾5064		4882.89	225	135	165
434		临选2039		6520.06	225	135	165
435		临选2098		6333.64	225	135	165
436		济南17		5970.52	225	135	165
437		陕225		5981.33	225	135	165
438		小偃54		4885.66	225	135	165
464	闫翠萍 裴雪霞 王姣爱杨峰曹勇张晶党建友	秸秆还田与施氮对冬小麦生长发育及水肥利用率的影响
465		S+N0(CK)		5632.83	0	90	0
466		S+N5		7407.4	75	90	0
467		S+N10		7815.03	150	90	0
468		S+N15		8286.01	225	90	0
469		S+N20		8066.24	300	90	0
470		N0(CK)		5295.03	0	90	0
471		N5		7093.29	75	90	0
472		N10		7476.3	150	90	0
473		N15		7893.41	225	90	0
474		N20		7998.03	300	90	0
475	Shandong province
476	石玉 2007年博士论文	不同类型小麦品质形成的生理机制及植株-土壤氮素循环研究
477		NPK	第一章不同类型小麦品种的品质差异及其生理基础	10103.4	240	105	75
478		NPK		6671.96	240	105	75
479		NPK		10194.7	240	105	75
480		NPK		6879.33	240	105	75
481		NPK		11096.8	240	105	75
482		NPK		9238.9	240	105	75
483		NPK		6521.03	240	105	75
484		NPK		10007.8	240	105	75
485		NPK		9453.11	240	105	75
486		NPK		8737.3	240	105	75
487		NPK		10425.2	240	105	75
488		NPK		10962.4	240	105	75
489		NPK		6894.95	240	105	75
490		NPK		7701.38	240	105	75
491		NPK		10134.3	240	105	75
492	石玉 博士论文		第二章施氮量对不同类型小麦品质形成调控机制的研究
493		N0		8077.93	0	105	75
494		N180		9483.32	180	105	75
495		N240		9601.08	240	105	75
496		N360		9588.77	360	105	75
497		N0		8561.4	0	105	75
498		N180		9538.27	180	105	75
499		N240		9756.35	240	105	75
500		N360		9735.37	360	105	75
501		N0		9291.8	0	105	75
502		N180		11071	180	105	75
503		N240		11311.9	240	105	75
504		N360		11097.6	360	105	75
505		N0		6670.6	0	105	75
506		N180		7764.31	180	105	75
507		N240		8027.65	240	105	75
508		N360		8216.78	360	105	75
543	晁赢，李旭花	长期定位施肥对土壤肥力特征及养分吸收利用的影响
544	定位试验	CK		1842	0	0	0
545		N1P1K1+M1	有机无机	5360	187.5	112.5	75
546		M2	有机肥	5317	187.5	112.5	75
547		N2P2K2	常量无机肥	5075	187.5	112.5	75
548		M3	高量有机肥	4940	375	112.5	75
549		N3P3K3	高量无机肥	5266	375	112.5	75
550	张法全 王小燕 于振文 王西芝 白洪立	公顷产10000 kg小麦氮素和干物质积累与分配特性
551	试验3	N0		8952.49	0	135	156
552		N210		9566.85	210	135	156
553		N240		9954.73	240	135	156
554		N270		10647	270	135	156
555		N300		9879.78	300	135	156
556		N330		9604.89	330	135	156
557	试验1	N0		8953.78	0	105	135
558		N180		9571.59	180	105	135
559		N240		10143.8	240	105	135
560	试验2	N260		10911.5	260	135	156
613	王旭清,王法宏,董玉红,任德昌,曹宏鑫
614	95(6)161	施肥	垄作	6195	207
616		施肥	平作	5629.5	207
618	烟农19	施肥	垄作	6765	207
620		施肥	平作	5965	207
686	Quanxiao Fang, Qiang Yu, Enli Wang, Yuhai Chen, Guoliang Zhang, Jing Wang ,Longhui Li	Plant Soil ,2006,284:335–350
687			N0	4800	0	186.722
688			N100	6000	100	186.722
689			N200	5900	200	186.722
690			N300	6100	300	186.722
698	Shaanxi province
730	王荣辉1,2,王朝辉1,李生秀	施磷量对旱地小麦氮磷钾和干物质积累及产量的影响
731		P0		4619	160	0	0
732		P50		5195	160	50	0
733		P100	OPT	5616	160	100	0
734		P150		5451	160	150	0
735	何晓雁1郝明德1, 2*李慧成2蔡志风3	黄土高原旱地小麦施肥对产量及水肥利用效率的影响
736		CK		1462.5	0	0	0
737		N		1803.8	120	0	0
738		M		5265	0	0	0
739		NP		3948.8	120	26.4	0
740		NM		5362.5	120	0	0
741		NPM		5898.8	120	26.4	0
742	杨晓1，郝明德2*，李芳林1	黄土区长期施肥对小麦产量和养分吸收的影响
743		CK		1784.97	0	0	0
744		P		1108.44	0	26.4	0
745		N		2395.38	120	0	0
746		NP		6180.69	120	26.4	0
747		M	每公顷75t	4865.66	198.8	8.3
748		PM		4565.09	198.8	34.7
749		NM	每公顷75t	6773.99	318.8	8.3
750		NPM		6913.29	318.8	34.7
760	赵新春,王朝辉	半干旱黄土区不同施氮水平冬小麦产量形成与氮素利用
761		N0		2400	0	135	0
762		N80		5020	80	135	0
763		N160		5390	160	135	0
764		N240		6110	240	135	0
765	赵新春,王朝辉	小麦的氮效率及施氮对小麦氮磷钾吸收与转运的影响
766		N0		4190	0	135	0
767		N80		5310	80	135	0
768		N160		5810	160	135	0
769		N240		5860	240	135	0
770	段敏,同延安,魏样	不同施肥条件下冬小麦氮素吸收、转运及累积的研究
771		CK		5266	0	0	0
772		FP		6766	300	97.5	0
773		N150P150K75		8762	150	150	75
774		N225P120K120		9474	225	120	120
775		N270P150K150		7287	270	150	150
776		N300P120K120		7396	300	120	120
777	段敏，同延安	2010年硕士学位论文	陕西关中地区小麦玉米养分资源管理及其高产探索研究
778		CK		4919	0	0	0
779		FP		6752	300	98	0
780		NP		7433	266	137	0
781		NK		7001	266	0	219
782		PK		5974	0	137	219
783		NPK		8218	266	137	219
807	党廷辉,郝明德,郭胜利,蔡贵信	旱地小麦施氮和地膜栽培的氮素效应与淋溶
808		CK		2774.8	0	75	0
809		N1		3986.4	100	75	0
810		N2		3733.6	150	75	0
811		N1F		4299	150	75	0
812	常规栽培(行距20 cm)	W		4207.8	150	75	0
813	膜际栽培(覆膜宽30 cm,膜间距60 cm,膜间种植4行,行距15cm)	WM1		4562.5	150	75	0
814	膜下栽培(覆膜宽60 cm,膜间距30cm,膜上种植4行,行距15 cm)	WM2		3995.1	150	75	0
815	少耕留高茬覆盖(休闲期免耕高留茬,并麦杆覆盖,行距20	WT		4246.9	150	75	0
816	赵新春,王朝辉	半干旱黄土区不同施氮水平冬小麦产量形成与氮素利用
817		0		2400	0	135	0
818		80		5020	80	135	0
819		160		5390	160	135	0
820		240		6110	240	135	0
854	王旭刚1,郝明德2,李建民1,张春霞2	氮磷配施对旱地小麦产量和吸肥特性的影响。
855		1	氮(磷)吸收量/(kg·hm-2)=籽粒氮(磷)含量	968.786	0	0
856		2	×籽粒产量+秸秆氮(磷)含量×秸秆产量,	788.208	0	90.0363
857		3		788.208	0	180.073
858		4		2891.1	90	0
859		5		3563.58	90	90.0363
860		6		3677.46	90	180.073
861		7		2152.02	180	0
862		8		5468.79	180	90.0363
863		9		5550.06	180	180.073
864	孙春梅 李生秀	不同基因型冬小麦的水氮利用效率研究
865	施氮	西杂1号		5115	120	120	0
866		西农1376(父）		4683.1	120	120	0
867		陕150		4592.7	120	120	0
868		小僵6号		4613.7	120	120	0
869		西农2611		3794.5	120	120	0
870		西农1376(母）		5023.5	120	120	0
871		陕160		4658.6	120	120	0
872		阎麦8911		4431.8	120	120	0
873		矮丰3号		5091.4	120	120	0
874		陕229		4429.3	120	120	0
875	不施氮	西杂1号		2373	0	120	0
876		西农1376(父）		3218.4	0	120	0
877		陕150		1860.9	0	120	0
878		小僵6号		1674.2	0	120	0
879		西农2611		1828.8	0	120	0
880		西农1376(母）		2643.7	0	120	0
881		陕160		2604.8	0	120	0
882		阎麦8911		2748.7	0	120	0
883		矮丰3号		2750.3	0	120	0
884		陕229		2578.8	0	120	0
885	翟军海 周建斌	不同水肥调控措施对小麦养分吸收的效应及其机理研究
886		CK		4834.9	0	225
887	灌水40mm	I		4843.9	0	225
888		N		5085	150	225
889		M	4500kg/ha麦草	4810.79	0	225
890		IN		5563.81	150	225
891		IM	4500kg/ha麦草	4655.07	0	225
892		NM	4500kg/ha麦草	5156.37	150	225
893		INM	4500kg/ha麦草	5756	150	225
894	徐福利 李生秀	氮素施用技术与不同保墒耕作施肥对土壤水肥因子及小麦产量的影响
895	地块1 1A	秋季施氮0	春季施氮0	3510	0	150
896	1B	0	50	4025	50	150
897	1C	0	100	3795	50	150
898	1D	0	150	3750	100	150
899	2A	50	0	3655	100	150
900	2B	50	50	3725	100	150
901	2C	50	100	3680	150	150
902	2D	50	150	3605	150	150
903	3A	100	0	3790	150	150
904	3B	100	50	4020	150	150
905	3C	100	100	4165	200	150
906	3D	100	150	3845	200	150
907	4A	150	0	3730	200	150
908	4B	150	50	3990	200	150
909	4C	150	100	4240	250	150
910	4D	150	150	3890	250	150
911	5A	200	0	3715	250	150
912	5B	200	50	3710	300	150
913	5C	200	100	3715	300	150
914	5D	200	150	3715	350	150
975	党廷辉,郝明德	黄土塬区不同水分条件下冬小麦氮肥效应与土壤氮素调节
976	1996-1998年平均	0		1038	0	90	0
977		45		2734.3	45	90	0
978		90		3557	90	90	0
979		135		3935.8	135	90	0
980		180		3757.5	180	90	0
981	同延安赵营赵护兵 樊红柱	施氮量对冬小麦氮素吸收、转运及产量的影响
982			N0	5472	0	96	208
983			N105	6378	105	96	208
984			N210	6771	210	96	208
985			N315	6742	315	96	208
986	王 兵 王朝辉	氮肥用量和栽培模式对西北旱地冬小麦生长和养分利用的影响
987			N0	2269	0	150	0
988			N1	5270	120	150	0
989			N2	4688	240	150	0
1007	唐旭 马义兵	小麦-玉米轮作土壤磷素长期演变规律研究
1008		杨陵	CK	1009
1009		1991-2005	N	1084
1010			NP	1261
1011			NK	5184
1012			NPK	5304
1013			NPKM	5301		256.8
1014			NPKSt	5412		117.7
1644	Beijing
1645	巨晓棠,潘家荣,刘学军,等	高肥力土壤冬小麦生长季肥料氮的去向研究Ⅰ.冬小麦生长季肥料氮去向
1646		0		4680	0	60	0
1647		120		6145	120	60	0
1648		240		5218	240	60	0
1649		360		5428	360	60	0
1650	刘学军,赵紫娟,巨晓棠,张福锁	基施氮肥对冬小麦产量、氮肥利用率及氮平衡的影响
1651		N0		4217	0	90	0
1652		N75		4433	75	90	0
1653		N112.5		4400	112.5	90	0
1654		N150		4450	150	90	0
1667	唐旭 马义兵	小麦-玉米轮作土壤磷素长期演变规律研究
1668		昌平	CK	605
1669		1991-2005	N	692
1670			NP	875
1671			NK	2914
1672			NPK	3530
1673			NPKM	3509		108.1
1674			NPKSt	4022		34.5
1	Shanxi province	1997年小麦山西临汾市乔李镇南麻村石灰性褐土钾肥长期定位试验	NP	5931	172.5	157.5	0
5	Shanxi province	1997年小麦山西临汾市乔李镇南麻村石灰性褐土钾肥长期定位试验	NPK	5886	172.5	157.5	150
9	Shanxi province	1997年小麦山西临汾市乔李镇南麻村石灰性褐土钾肥长期定位试验	NPSt	6607	172.5	157.5	0
13	Shanxi province	1997年小麦山西临汾市乔李镇南麻村石灰性褐土钾肥长期定位试验	NPKSt	7087	172.5	157.5	150
17	Shanxi province	1993年小麦山西临汾市乔李镇南麻村石灰性褐土钾肥长期定位试验	NP	4910	138	126	0
21	Shanxi province	1993年小麦山西临汾市乔李镇南麻村石灰性褐土钾肥长期定位试验	NPK	4955	138	126	150
25	Shanxi province	1993年小麦山西临汾市乔李镇南麻村石灰性褐土钾肥长期定位试验	NPSt	5390	138	126	0
29	Shanxi province	1993年小麦山西临汾市乔李镇南麻村石灰性褐土钾肥长期定位试验	NPKSt	5135	138	126	150
33	Shanxi province	1994年小麦山西临汾市乔李镇南麻村石灰性褐土钾肥长期定位试验	NP	5270	172.5	105	0
37	Shanxi province	1994年小麦山西临汾市乔李镇南麻村石灰性褐土钾肥长期定位试验	NPK	5676	172.5	105	150
41	Shanxi province	1994年小麦山西临汾市乔李镇南麻村石灰性褐土钾肥长期定位试验	NPSt	5661	172.5	105	0
45	Shanxi province	1994年小麦山西临汾市乔李镇南麻村石灰性褐土钾肥长期定位试验	NPKSt	5796	172.5	105	150
49	Shanxi province	1995年小麦山西临汾市乔李镇南麻村石灰性褐土钾肥长期定位试验	NP	5330	172.5	105	0
53	Shanxi province	1995年小麦山西临汾市乔李镇南麻村石灰性褐土钾肥长期定位试验	NPK	5405	172.5	105	150
57	Shanxi province	1995年小麦山西临汾市乔李镇南麻村石灰性褐土钾肥长期定位试验	NPSt	6532	172.5	105	0
61	Shanxi province	1995年小麦山西临汾市乔李镇南麻村石灰性褐土钾肥长期定位试验	NPKSt	6607	172.5	105	150
65	Shanxi province	1996年小麦山西临汾市乔李镇南麻村石灰性褐土钾肥长期定位试验	NP	4715	172.5	105	0
69	Shanxi province	1996年小麦山西临汾市乔李镇南麻村石灰性褐土钾肥长期定位试验	NPK	5646	172.5	105	150
73	Shanxi province	1996年小麦山西临汾市乔李镇南麻村石灰性褐土钾肥长期定位试验	NPSt	5901	172.5	105	0
77	Shanxi province	1996年小麦山西临汾市乔李镇南麻村石灰性褐土钾肥长期定位试验	NPKSt	6351	172.5	105	150
81	Shanxi province	1998年小麦山西临汾市乔李镇南麻村石灰性褐土钾肥长期定位试验	NP	4880	172.5	157.5	0
85	Shanxi province	1998年小麦山西临汾市乔李镇南麻村石灰性褐土钾肥长期定位试验	NPK	5480	172.5	157.5	150
89	Shanxi province	1998年小麦山西临汾市乔李镇南麻村石灰性褐土钾肥长期定位试验	NPSt	5556	172.5	157.5	0
97	Shanxi province	1999年小麦山西临汾市乔李镇南麻村石灰性褐土钾肥长期定位试验	NP	4099	138	126	0
101	Shanxi province	1999年小麦山西临汾市乔李镇南麻村石灰性褐土钾肥长期定位试验	NPK	4805	138	126	150
105	Shanxi province	1999年小麦山西临汾市乔李镇南麻村石灰性褐土钾肥长期定位试验	NPSt	4655	138	126	0
109	Shanxi province	1999年小麦山西临汾市乔李镇南麻村石灰性褐土钾肥长期定位试验	NPKSt	5180	138	126	150
128	Shanxi province	2000年小麦山西临汾市乔李镇南麻村钾肥长期定位试验	NP	5255	138	126	0
132	Shanxi province	2000年小麦山西临汾市乔李镇南麻村钾肥长期定位试验	NPK	6547	138	126	150
136	Shanxi province	2000年小麦山西临汾市乔李镇南麻村钾肥长期定位试验	NPSt	5706	138	126	0
140	Shanxi province	2000年小麦山西临汾市乔李镇南麻村钾肥长期定位试验	NPKSt	6366	138	126	150
144	Shanxi province	2001年小麦山西临汾市乔李镇南麻村钾肥长期定位试验	NPSt	3994	198.75	86.25	0
148	Shanxi province	2001年小麦山西临汾市乔李镇南麻村钾肥长期定位试验	NPKSt	4955	198.75	86.25	150
152	Shanxi province	2001年小麦山西临汾市乔李镇南麻村钾肥长期定位试验	NP	3754	198.75	86.25	0
156	Shanxi province	2001年小麦山西临汾市乔李镇南麻村钾肥长期定位试验	NPK	4474	198.75	86.25	150
	Shanxi province
1	Shanxi province	2004年小麦山西临汾市乔李镇南麻村养分缺素试验	OPT	5491	180	150	150
5	Shanxi province	2004年小麦山西临汾市乔李镇南麻村养分缺素试验	-N	2699	0	150	150
9	Shanxi province	2004年小麦山西临汾市乔李镇南麻村养分缺素试验	-P	5119	180	0	150
13	Shanxi province	2004年小麦山西临汾市乔李镇南麻村养分缺素试验	-K	5305	180	150	0
17	Shanxi province	2004年小麦山西临汾市乔李镇南麻村养分缺素试验	-Zn	5072	180	150	150
21	Shanxi province	2004年小麦山西临汾市乔李镇南麻村养分缺素试验	-Mn	4933	180	150	150
25	Shanxi province	2005年小麦山西临汾市乔李南麻村养分缺素试验	OPT	7524	180	150	150
29	Shanxi province	2005年小麦山西临汾市乔李南麻村养分缺素试验	-N	6598	0	150	150
33	Shanxi province	2005年小麦山西临汾市乔李南麻村养分缺素试验	-P	6218	180	0	150
37	Shanxi province	2005年小麦山西临汾市乔李南麻村养分缺素试验	-K	7524	180	150	0
41	Shanxi province	2005年小麦山西临汾市乔李南麻村养分缺素试验	-Zn	7524	180	150	150
45	Shanxi province	2005年小麦山西临汾市乔李南麻村养分缺素试验	－Mn	7866	180	150	150
49	Shanxi province	2003年小麦山西临汾市乔李镇南麻村养分缺素试验	OPT	7444	180	150	150
53	Shanxi province	2003年小麦山西临汾市乔李镇南麻村养分缺素试验	-N	5926	0	150	150
57	Shanxi province	2003年小麦山西临汾市乔李镇南麻村养分缺素试验	-P	5889	180	0	150
61	Shanxi province	2003年小麦山西临汾市乔李镇南麻村养分缺素试验	-K	6296	180	150	0
65	Shanxi province	2003年小麦山西临汾市乔李镇南麻村养分缺素试验	-Zn	7630	180	150	150
69	Shanxi province	2003年小麦山西临汾市乔李镇南麻村养分缺素试验	-Mn	7037	180	150	150
73	Shanxi province	2002年小麦山西临汾乔李镇南麻村钾肥长期定位试验	NP	4354	198.75	86.25	0
77	Shanxi province	2002年小麦山西临汾乔李镇南麻村钾肥长期定位试验	NPK	4805	198.75	86.25	150
81	Shanxi province	2002年小麦山西临汾乔李镇南麻村钾肥长期定位试验	NPSt	5706	198.75	86.25	0
85	Shanxi province	2002年小麦山西临汾乔李镇南麻村钾肥长期定位试验	NPKSt	5556	198.75	86.25	150
109	Shanxi province	2004年小麦山西临汾市乔李镇南麻村石灰性褐土钾肥长期定位试验	NP	6990	198.8	86.2	0
113	Shanxi province	2004年小麦山西临汾市乔李镇南麻村石灰性褐土钾肥长期定位试验	NPK	7380	198.75	86.25	150
117	Shanxi province	2004年小麦山西临汾市乔李镇南麻村石灰性褐土钾肥长期定位试验	NPSt	7200	198.75	86.25	0
121	Shanxi province	2004年小麦山西临汾市乔李镇南麻村石灰性褐土钾肥长期定位试验	NPKSt	7890	198.75	86.25	150
125	Shanxi province	2003年小麦山西临汾乔李镇南麻村钾肥长期定位试验	NP	5736	198.75	86.25	0
129	Shanxi province	2003年小麦山西临汾乔李镇南麻村钾肥长期定位试验	NPK	5910	198.75	86.25	150
133	Shanxi province	2003年小麦山西临汾乔李镇南麻村钾肥长期定位试验	NPSt	5280	198.75	86.25	0
137	Shanxi province	2003年小麦山西临汾乔李镇南麻村钾肥长期定位试验	NPKSt	6630	198.75	86.25	150
143	Shanxi province	2003年小麦山西临汾市乔李镇南麻村磷钾肥肥效试验	NP1k0	4560	180	150	0
147	Shanxi province	2003年小麦山西临汾市乔李镇南麻村磷钾肥肥效试验	NP1K1	5160	180	150	100
151	Shanxi province	2003年小麦山西临汾市乔李镇南麻村磷钾肥肥效试验	NP1K2	5490	180	150	150
155	Shanxi province	2003年小麦山西临汾市乔李镇南麻村磷钾肥肥效试验	NP1K3	4980	180	150	200
159	Shanxi province	2003年小麦山西临汾市乔李镇南麻村磷钾肥肥效试验	NP2K2	4620	180	90	150
163	Shanxi province	2003年小麦山西临汾市乔李镇南麻村磷钾肥肥效试验	FP	4560	180	90	0
167	Shanxi province	2005年小麦山西临汾乔李镇南麻村钾肥长期定位试验	NP	5485	198.8	86.2	0
171	Shanxi province	2005年小麦山西临汾乔李镇南麻村钾肥长期定位试验	NPK	5972	198.75	86.25	150
175	Shanxi province	2005年小麦山西临汾乔李镇南麻村钾肥长期定位试验	NPKSt	6179	198.75	86.25	150
179	Shanxi province	2005年小麦山西临汾乔李镇南麻村钾肥长期定位试验	NPSt	5674	198.75	86.25	0
195	Shanxi province	2007年冬小麦不同品种钾肥（硫酸钾、氯化钾）对产量和品质的影响02	NP	4860	195	90	0
199	Shanxi province	2007年冬小麦不同品种钾肥（硫酸钾、氯化钾）对产量和品质的影响02	NPK（cl）	6359	195	90	150
203	Shanxi province	2007年冬小麦不同品种钾肥（硫酸钾、氯化钾）对产量和品质的影响02	NPK（SO4）	5384	195	90	150
207	Shanxi province	2007年冬小麦不同品种钾肥（硫酸钾、氯化钾）对产量和品质的影响01	NP	5631	195	90	0
211	Shanxi province	2007年冬小麦不同品种钾肥（硫酸钾、氯化钾）对产量和品质的影响01	NPK（cl)	5727	195	90	150
215	Shanxi province	2007年冬小麦不同品种钾肥（硫酸钾、氯化钾）对产量和品质的影响01	NPK(SO4)	5930	195	90	150
219	Shanxi province	2007年冬小麦养分限制因子研究	OPT	6756	195	90	150
223	Shanxi province	2007年冬小麦养分限制因子研究	OPT-N	5870	0	90	150
227	Shanxi province	2007年冬小麦养分限制因子研究	OPT－P	6299	195	0	150
231	Shanxi province	2007年冬小麦养分限制因子研究	OPT－K	6683	195	90	0
239	Shanxi province	2007年冬小麦养分限制因子研究	FP	6384	172.5	144	0
251	Shanxi province	2007年冬小麦养分限制因子研究	CK	6110	0	0	0
255	Shanxi province	2007年冬小麦－夏玉米轮作条件下养分限制因子研究（小麦）	OPT	8084	180	150	200
259	Shanxi province	2007年冬小麦－夏玉米轮作条件下养分限制因子研究（小麦）	OPT-N	3728	0	150	200
263	Shanxi province	2007年冬小麦－夏玉米轮作条件下养分限制因子研究（小麦）	OP-P	6356	180	0	200
267	Shanxi province	2007年冬小麦－夏玉米轮作条件下养分限制因子研究（小麦）	OPT-K	7392	180	200	0
271	Shanxi province	2007年冬小麦－夏玉米轮作条件下养分限制因子研究（小麦）	OPT-Zn	8055	180	150	200
275	Shanxi province	2007年冬小麦－夏玉米轮作条件下养分限制因子研究（小麦）	CK	3385	0	0	0
279	Shanxi province	2007年冬小麦－夏玉米长期施用钾肥下钾素循环与调控（小麦）	NP	7110	198.75	86.25	0
283	Shanxi province	2007年冬小麦－夏玉米长期施用钾肥下钾素循环与调控（小麦）	NPK	7735	198.75	86.25	150
287	Shanxi province	2007年冬小麦－夏玉米长期施用钾肥下钾素循环与调控（小麦）	NPSt	7212	198.75	86.25	0
291	Shanxi province	2007年冬小麦－夏玉米长期施用钾肥下钾素循环与调控（小麦）	NPKSt	7946	198.75	86.75	150
295	Shanxi province	2008年山西省冬小麦－夏玉米轮作条件下不同施氮肥方式对作物产量、品质及环境的影响01	OPT-N	5959.92	0	150	150
296	Shanxi province	2008年山西省冬小麦－夏玉米轮作条件下不同施氮肥方式对作物产量、品质及环境的影响01	OPT-N	6002.1	0	150	150
297	Shanxi province	2008年山西省冬小麦－夏玉米轮作条件下不同施氮肥方式对作物产量、品质及环境的影响01	OPT-N	5506.2	0	150	150
298	Shanxi province	2008年山西省冬小麦－夏玉米轮作条件下不同施氮肥方式对作物产量、品质及环境的影响01	OPT1	9085.8	225	150	150
299	Shanxi province	2008年山西省冬小麦－夏玉米轮作条件下不同施氮肥方式对作物产量、品质及环境的影响01	OPT1	9423.24	225	150	150
300	Shanxi province	2008年山西省冬小麦－夏玉米轮作条件下不同施氮肥方式对作物产量、品质及环境的影响01	OPT1	8448.54	225	150	150
301	Shanxi province	2008年山西省冬小麦－夏玉米轮作条件下不同施氮肥方式对作物产量、品质及环境的影响01	OPT2	8945.58	225	150	150
302	Shanxi province	2008年山西省冬小麦－夏玉米轮作条件下不同施氮肥方式对作物产量、品质及环境的影响01	OPT2	8945.58	225	150	150
303	Shanxi province	2008年山西省冬小麦－夏玉米轮作条件下不同施氮肥方式对作物产量、品质及环境的影响01	OPT2	9712.8	225	150	150
304	Shanxi province	2008年山西省冬小麦－夏玉米轮作条件下不同施氮肥方式对作物产量、品质及环境的影响01	OPT3	9529.26	225	150	150
305	Shanxi province	2008年山西省冬小麦－夏玉米轮作条件下不同施氮肥方式对作物产量、品质及环境的影响01	OPT3	8993.46	225	150	150
306	Shanxi province	2008年山西省冬小麦－夏玉米轮作条件下不同施氮肥方式对作物产量、品质及环境的影响01	OPT3	9468.84	225	150	150
307	Shanxi province	2008年山西省冬小麦－夏玉米轮作条件下不同施氮肥方式对作物产量、品质及环境的影响01	OPT4	9534.96	225	150	150
308	Shanxi province	2008年山西省冬小麦－夏玉米轮作条件下不同施氮肥方式对作物产量、品质及环境的影响01	OPT4	9776.64	225	150	150
309	Shanxi province	2008年山西省冬小麦－夏玉米轮作条件下不同施氮肥方式对作物产量、品质及环境的影响01	OPT4	9365.1	225	150	150
310	Shanxi province	2008年山西省冬小麦－夏玉米轮作条件下不同施氮肥方式对作物产量、品质及环境的影响01	OPT5	9191.82	225	150	150
311	Shanxi province	2008年山西省冬小麦－夏玉米轮作条件下不同施氮肥方式对作物产量、品质及环境的影响01	OPT5	9864.42	225	150	150
312	Shanxi province	2008年山西省冬小麦－夏玉米轮作条件下不同施氮肥方式对作物产量、品质及环境的影响01	OPT5	9976.14	225	150	150
313	Shanxi province	2008年山西省冬小麦－夏玉米轮作条件下不同施氮肥方式对作物产量、品质及环境的影响01	CK0	5025.12	0	0	0
314	Shanxi province	2008年山西省冬小麦－夏玉米轮作条件下不同施氮肥方式对作物产量、品质及环境的影响01	CK0	5614.5	0	0	0
315	Shanxi province	2008年山西省冬小麦－夏玉米轮作条件下不同施氮肥方式对作物产量、品质及环境的影响01	CK0	5658.96	0	0	0
316	Shanxi province	2009年山西省冬小麦不同施氮量及氮肥分配方式对作物产量及环境的影响(试验1)	1	6201.6	0	105	75
317	Shanxi province	2009年山西省冬小麦不同施氮量及氮肥分配方式对作物产量及环境的影响(试验1)	1	6224.4	0	105	75
318	Shanxi province	2009年山西省冬小麦不同施氮量及氮肥分配方式对作物产量及环境的影响(试验1)	1	5873.28	0	105	75
319	Shanxi province	2009年山西省冬小麦不同施氮量及氮肥分配方式对作物产量及环境的影响(试验1)	1	5147.1	0	105	75
320	Shanxi province	2009年山西省冬小麦不同施氮量及氮肥分配方式对作物产量及环境的影响(试验1)	2	6116.1	60	105	75
321	Shanxi province	2009年山西省冬小麦不同施氮量及氮肥分配方式对作物产量及环境的影响(试验1)	2	6233.52	60	105	75
322	Shanxi province	2009年山西省冬小麦不同施氮量及氮肥分配方式对作物产量及环境的影响(试验1)	2	6369.18	60	105	75
323	Shanxi province	2009年山西省冬小麦不同施氮量及氮肥分配方式对作物产量及环境的影响(试验1)	2	5849.34	60	105	75
324	Shanxi province	2009年山西省冬小麦不同施氮量及氮肥分配方式对作物产量及环境的影响(试验1)	40603	7021.26	120	105	75
325	Shanxi province	2009年山西省冬小麦不同施氮量及氮肥分配方式对作物产量及环境的影响(试验1)	40603	6691.8	120	105	75
326	Shanxi province	2009年山西省冬小麦不同施氮量及氮肥分配方式对作物产量及环境的影响(试验1)	40603	6991.62	120	105	75
327	Shanxi province	2009年山西省冬小麦不同施氮量及氮肥分配方式对作物产量及环境的影响(试验1)	40603	5776.38	120	105	75
328	Shanxi province	2009年山西省冬小麦不同施氮量及氮肥分配方式对作物产量及环境的影响(试验1)	40604	6227.82	120	105	75
329	Shanxi province	2009年山西省冬小麦不同施氮量及氮肥分配方式对作物产量及环境的影响(试验1)	40604	6160.56	120	105	75
330	Shanxi province	2009年山西省冬小麦不同施氮量及氮肥分配方式对作物产量及环境的影响(试验1)	40604	6764.76	120	105	75
331	Shanxi province	2009年山西省冬小麦不同施氮量及氮肥分配方式对作物产量及环境的影响(试验1)	40604	6162.84	120	105	75
332	Shanxi province	2009年山西省冬小麦不同施氮量及氮肥分配方式对作物产量及环境的影响(试验1)	40605	6389.7	120	105	75
333	Shanxi province	2009年山西省冬小麦不同施氮量及氮肥分配方式对作物产量及环境的影响(试验1)	40605	6327	120	105	75
334	Shanxi province	2009年山西省冬小麦不同施氮量及氮肥分配方式对作物产量及环境的影响(试验1)	40605	6840	120	105	75
335	Shanxi province	2009年山西省冬小麦不同施氮量及氮肥分配方式对作物产量及环境的影响(试验1)	40605	6757.92	120	105	75
336	Shanxi province	2009年山西省冬小麦不同施氮量及氮肥分配方式对作物产量及环境的影响(试验1)	40634	7622.04	180	105	75
337	Shanxi province	2009年山西省冬小麦不同施氮量及氮肥分配方式对作物产量及环境的影响(试验1)	40634	7333.62	180	105	75
338	Shanxi province	2009年山西省冬小麦不同施氮量及氮肥分配方式对作物产量及环境的影响(试验1)	40634	6790.98	180	105	75
339	Shanxi province	2009年山西省冬小麦不同施氮量及氮肥分配方式对作物产量及环境的影响(试验1)	40634	6289.38	180	105	75
340	Shanxi province	2009年山西省冬小麦不同施氮量及氮肥分配方式对作物产量及环境的影响(试验1)	40635	7623.18	180	105	75
341	Shanxi province	2009年山西省冬小麦不同施氮量及氮肥分配方式对作物产量及环境的影响(试验1)	40635	7209.36	180	105	75
342	Shanxi province	2009年山西省冬小麦不同施氮量及氮肥分配方式对作物产量及环境的影响(试验1)	40635	6783	180	105	75
343	Shanxi province	2009年山西省冬小麦不同施氮量及氮肥分配方式对作物产量及环境的影响(试验1)	40635	6947.16	180	105	75
344	Shanxi province	2009年山西省冬小麦不同施氮量及氮肥分配方式对作物产量及环境的影响(试验1)	40636	7400.88	180	105	75
345	Shanxi province	2009年山西省冬小麦不同施氮量及氮肥分配方式对作物产量及环境的影响(试验1)	40636	8267.28	180	105	75
346	Shanxi province	2009年山西省冬小麦不同施氮量及氮肥分配方式对作物产量及环境的影响(试验1)	40636	7866	180	105	75
347	Shanxi province	2009年山西省冬小麦不同施氮量及氮肥分配方式对作物产量及环境的影响(试验1)	40636	7423.68	180	105	75
348	Shanxi province	2009年山西省冬小麦不同施氮量及氮肥分配方式对作物产量及环境的影响(试验1)	5	8180.64	240	105	75
349	Shanxi province	2009年山西省冬小麦不同施氮量及氮肥分配方式对作物产量及环境的影响(试验1)	5	8042.7	240	105	75
350	Shanxi province	2009年山西省冬小麦不同施氮量及氮肥分配方式对作物产量及环境的影响(试验1)	5	7490.94	240	105	75
351	Shanxi province	2009年山西省冬小麦不同施氮量及氮肥分配方式对作物产量及环境的影响(试验1)	5	6993.9	240	105	75
352	Shanxi province	2009年山西省冬小麦不同施氮量及氮肥分配方式对作物产量及环境的影响(试验1)	6	7355.28	300	105	75
353	Shanxi province	2009年山西省冬小麦不同施氮量及氮肥分配方式对作物产量及环境的影响(试验1)	6	7612.92	300	105	75
354	Shanxi province	2009年山西省冬小麦不同施氮量及氮肥分配方式对作物产量及环境的影响(试验1)	6	6262.02	300	105	75
355	Shanxi province	2009年山西省冬小麦不同施氮量及氮肥分配方式对作物产量及环境的影响(试验1)	6	6946.02	300	105	75
356	Shanxi province	2009年山西省冬小麦养分限制因子研究(试验3)	OPT	4786.86	210	105	90
357	Shanxi province	2009年山西省冬小麦养分限制因子研究(试验3)	OPT	5474.28	210	105	90
358	Shanxi province	2009年山西省冬小麦养分限制因子研究(试验3)	OPT	4631.82	210	105	90
359	Shanxi province	2009年山西省冬小麦养分限制因子研究(试验3)	OPT-N	4178.1	0	105	90
360	Shanxi province	2009年山西省冬小麦养分限制因子研究(试验3)	OPT-N	4632.96	0	105	90
361	Shanxi province	2009年山西省冬小麦养分限制因子研究(试验3)	OPT-N	3885.12	0	105	90
362	Shanxi province	2009年山西省冬小麦养分限制因子研究(试验3)	OPT-P	4493.88	210	0	90
363	Shanxi province	2009年山西省冬小麦养分限制因子研究(试验3)	OPT-P	4468.8	210	0	90
364	Shanxi province	2009年山西省冬小麦养分限制因子研究(试验3)	OPT-P	4005.96	210	0	90
365	Shanxi province	2009年山西省冬小麦养分限制因子研究(试验3)	OPT-K	4265.88	210	105	0
366	Shanxi province	2009年山西省冬小麦养分限制因子研究(试验3)	OPT-K	4692.24	210	105	0
367	Shanxi province	2009年山西省冬小麦养分限制因子研究(试验3)	OPT-K	4067.52	210	105	0
368	Shanxi province	2009年山西省冬小麦养分限制因子研究(试验3)	60%OPT-N	4037.88	126	105	90
369	Shanxi province	2009年山西省冬小麦养分限制因子研究(试验3)	60%OPT-N	4305.78	126	105	90
370	Shanxi province	2009年山西省冬小麦养分限制因子研究(试验3)	60%OPT-N	4731	126	105	90
371	Shanxi province	2009年山西省冬小麦养分限制因子研究(试验3)	FP	4018.5	262.5	69	0
372	Shanxi province	2009年山西省冬小麦养分限制因子研究(试验3)	FP	4490.46	262.5	69	0
373	Shanxi province	2009年山西省冬小麦养分限制因子研究(试验3)	FP	4476.78	262.5	69	0
374	Shanxi province	2009年山西省冬小麦养分限制因子研究(试验3)	CK	3791.64	0	0	0
375	Shanxi province	2009年山西省冬小麦养分限制因子研究(试验3)	CK	4021.92	0	0	0
376	Shanxi province	2009年山西省冬小麦养分限制因子研究(试验3)	CK	4104	0	0	0
377	Shanxi province	2009年山西省冬小麦高效施肥技术集成研究(试验4)	CK	5834.52	0	0	0
381	Shanxi province	2009年山西省冬小麦高效施肥技术集成研究(试验4)	N240P150K90	6761.34	240	150	90
385	Shanxi province	2009年山西省冬小麦高效施肥技术集成研究(试验4)	N180P150K90	8551.14	180	150	90
389	Shanxi province	2009年山西省冬小麦高效施肥技术集成研究(试验4)	N180P150K90Zn30	8228.52	180	150	90
393	Shanxi province	2009年山西省冬小麦高效施肥技术集成研究(试验4)	N180P150K90Zn30+秸秆还田	7852.32	180	150	90
397	Shanxi province	2009年山西省冬小麦高效施肥技术集成研究(试验4)	N180P150K90Zn30+秸秆还田+菌剂	7916.16	180	150	90
401	Shanxi province	2009年山西省冬小麦氮适宜用量研究(试验2)	N0P0K0	5108.34	0	0	0
402	Shanxi province	2009年山西省冬小麦氮适宜用量研究(试验2)	N0P0K0	4962.42	0	0	0
403	Shanxi province	2009年山西省冬小麦氮适宜用量研究(试验2)	N0P0K0	5530.14	0	0	0
404	Shanxi province	2009年山西省冬小麦氮适宜用量研究(试验2)	N0P0K0	5925.72	0	0	0
405	Shanxi province	2009年山西省冬小麦氮适宜用量研究(试验2)	N0P2K2	5989.56	0	210	150
406	Shanxi province	2009年山西省冬小麦氮适宜用量研究(试验2)	N0P2K2	6396.54	0	210	150
407	Shanxi province	2009年山西省冬小麦氮适宜用量研究(试验2)	N0P2K2	5310.12	0	210	150
408	Shanxi province	2009年山西省冬小麦氮适宜用量研究(试验2)	N0P2K2	6031.74	0	210	150
413	Shanxi province	2009年山西省冬小麦氮适宜用量研究(试验2)	N2P2K2	7236.72	180	210	150
414	Shanxi province	2009年山西省冬小麦氮适宜用量研究(试验2)	N2P2K2	7156.92	180	210	150
415	Shanxi province	2009年山西省冬小麦氮适宜用量研究(试验2)	N2P2K2	6992.76	180	210	150
416	Shanxi province	2009年山西省冬小麦氮适宜用量研究(试验2)	N2P2K2	8208	180	210	150
421	Shanxi province	2009年山西省冬小麦磷适宜用量研究(试验2)	N0P0K0	5108.34	0	0	0
425	Shanxi province	2009年山西省冬小麦磷适宜用量研究(试验2)	N2P0K2	5167.62	180	0	150
433	Shanxi province	2009年山西省冬小麦磷适宜用量研究(试验2)	N2P2K2	7236.72	180	210	150
441	Shanxi province	2009年山西省冬小麦钾适宜用量研究(试验2)	N0P0K0	5108.34	0	0	0
445	Shanxi province	2009年山西省冬小麦钾适宜用量研究(试验2)	N2P2K0	5167.62	180	210	0
453	Shanxi province	2009年山西省冬小麦钾适宜用量研究(试验2)	N2P2K2	7236.72	180	210	150
461	Shanxi province	2009年山西省轮作条件下冬小麦养分耗竭后土壤恢复研究(试验6)	OPT	7052.04	180	150	200
462	Shanxi province	2009年山西省轮作条件下冬小麦养分耗竭后土壤恢复研究(试验6)	OPT	6270	180	150	200
465	Shanxi province	2009年山西省轮作条件下冬小麦养分耗竭后土壤恢复研究(试验6)	OPT-N	5840.22	0	150	200
466	Shanxi province	2009年山西省轮作条件下冬小麦养分耗竭后土壤恢复研究(试验6)	OPT-N	5780.94	0	150	200
469	Shanxi province	2009年山西省轮作条件下冬小麦养分耗竭后土壤恢复研究(试验6)	OPT-P	4556.58	180	0	200
470	Shanxi province	2009年山西省轮作条件下冬小麦养分耗竭后土壤恢复研究(试验6)	OPT-P	4937.34	180	0	200
473	Shanxi province	2009年山西省轮作条件下冬小麦养分耗竭后土壤恢复研究(试验6)	OPT-K	5212.08	180	150	0
474	Shanxi province	2009年山西省轮作条件下冬小麦养分耗竭后土壤恢复研究(试验6)	OPT-K	6232.38	180	150	0
477	Shanxi province	2009年山西省轮作条件下冬小麦养分耗竭后土壤恢复研究(试验6)	OPT-Zn	6198.18	180	150	200
478	Shanxi province	2009年山西省轮作条件下冬小麦养分耗竭后土壤恢复研究(试验6)	OPT-Zn	5690.88	180	150	200
481	Shanxi province	2009年山西省轮作条件下冬小麦养分耗竭后土壤恢复研究(试验6)	CK	4130.22	0	0	0
482	Shanxi province	2009年山西省轮作条件下冬小麦养分耗竭后土壤恢复研究(试验6)	CK	4607.88	0	0	0
485	Shanxi province	2009年山西省在轮作条件下长期施用钾肥对冬小麦钾素循环与调控(试验5)	NP	5038.8	198.75	86.25	0
486	Shanxi province	2009年山西省在轮作条件下长期施用钾肥对冬小麦钾素循环与调控(试验5)	NP	5404.74	198.75	86.25	0
489	Shanxi province	2009年山西省在轮作条件下长期施用钾肥对冬小麦钾素循环与调控(试验5)	NPK	5506.2	198.75	86.25	150
490	Shanxi province	2009年山西省在轮作条件下长期施用钾肥对冬小麦钾素循环与调控(试验5)	NPK	4915.68	198.75	86.25	150
493	Shanxi province	2009年山西省在轮作条件下长期施用钾肥对冬小麦钾素循环与调控(试验5)	NPSt	5546.1	198.75	86.25	150
494	Shanxi province	2009年山西省在轮作条件下长期施用钾肥对冬小麦钾素循环与调控(试验5)	NPSt	5139.12	198.75	86.25	150
497	Shanxi province	2009年山西省在轮作条件下长期施用钾肥对冬小麦钾素循环与调控(试验5)	NPKSt	5702.28	198.75	86.25	150
498	Shanxi province	2009年山西省在轮作条件下长期施用钾肥对冬小麦钾素循环与调控(试验5)	NPKSt	4748.1	198.75	86.25	150
501	Shanxi province	2008年山西省冬小麦－夏玉米轮作条件下养分限制因子研究01	OPT	9234	180	150	200
502	Shanxi province	2008年山西省冬小麦－夏玉米轮作条件下养分限制因子研究01	OPT	8926.2	180	150	200
505	Shanxi province	2008年山西省冬小麦－夏玉米轮作条件下养分限制因子研究01	OPT-N	2991.36	0	150	200
506	Shanxi province	2008年山西省冬小麦－夏玉米轮作条件下养分限制因子研究01	OPT-N	3629.76	0	150	200
509	Shanxi province	2008年山西省冬小麦－夏玉米轮作条件下养分限制因子研究01	OPT-P	7708.68	180	0	200
510	Shanxi province	2008年山西省冬小麦－夏玉米轮作条件下养分限制因子研究01	OPT-P	7702.98	180	0	200
513	Shanxi province	2008年山西省冬小麦－夏玉米轮作条件下养分限制因子研究01	OPT-K	8910.24	180	150	0
514	Shanxi province	2008年山西省冬小麦－夏玉米轮作条件下养分限制因子研究01	OPT-K	8336.82	180	150	0
517	Shanxi province	2008年山西省冬小麦－夏玉米轮作条件下养分限制因子研究01	OPT-Zn	8169.24	180	150	200
518	Shanxi province	2008年山西省冬小麦－夏玉米轮作条件下养分限制因子研究01	OPT-Zn	8208	180	150	200
521	Shanxi province	2008年山西省冬小麦－夏玉米轮作条件下养分限制因子研究01	CK	3225.06	0	0	0
522	Shanxi province	2008年山西省冬小麦－夏玉米轮作条件下养分限制因子研究01	CK	3392.64	0	0	0
523	Shanxi province	2008年山西省冬小麦－夏玉米轮作条件下养分限制因子研究01	CK	3575.04	0	0	0
525	Shanxi province	2004年山西省钾肥长期定位试验总结(试验1)	CK	6997.3	195	105	0
529	Shanxi province	2004年山西省钾肥长期定位试验总结(试验1)	+K	7387.8	195	105	150
533	Shanxi province	2004年山西省钾肥长期定位试验总结(试验1)	+ST	7207.6	195	105	0
537	Shanxi province	2004年山西省钾肥长期定位试验总结(试验1)	+K+ST	7898.3	195	105	150
541	Shanxi province	2008年山西省冬小麦－夏玉米长期施用钾肥下钾素循环与调控（小麦）	NP	7785.06	195.75	85.26	0
545	Shanxi province	2008年山西省冬小麦－夏玉米长期施用钾肥下钾素循环与调控（小麦）	NPK	7962.9	195.75	85.26	150
549	Shanxi province	2008年山西省冬小麦－夏玉米长期施用钾肥下钾素循环与调控（小麦）	NPST	8071.2	195.75	85.26	0
553	Shanxi province	2008年山西省冬小麦－夏玉米长期施用钾肥下钾素循环与调控（小麦）	NPKST	8783.7	195.75	85.26	150
557	Shanxi province	2006年山西省临汾市长期施用钾肥下冬小麦钾素循环与调控	NP	6932.34	198.75	86.25	0
558	Shanxi province	2006年山西省临汾市长期施用钾肥下冬小麦钾素循环与调控	NP	7078.26	198.75	86.25	0
559	Shanxi province	2006年山西省临汾市长期施用钾肥下冬小麦钾素循环与调控	NP	6846.84	198.75	86.25	0
560	Shanxi province	2006年山西省临汾市长期施用钾肥下冬小麦钾素循环与调控	NP	7078.26	198.75	86.25	0
561	Shanxi province	2006年山西省临汾市长期施用钾肥下冬小麦钾素循环与调控	NPK	7855.74	198.75	86.25	150
562	Shanxi province	2006年山西省临汾市长期施用钾肥下冬小麦钾素循环与调控	NPK	7262.94	198.75	86.25	150
563	Shanxi province	2006年山西省临汾市长期施用钾肥下冬小麦钾素循环与调控	NPK	7821.54	198.75	86.25	150
564	Shanxi province	2006年山西省临汾市长期施用钾肥下冬小麦钾素循环与调控	NPK	7742.88	198.75	86.25	150
565	Shanxi province	2006年山西省临汾市长期施用钾肥下冬小麦钾素循环与调控	NPSt	7690.44	198.75	86.25	0
566	Shanxi province	2006年山西省临汾市长期施用钾肥下冬小麦钾素循环与调控	NPSt	6931.2	198.75	86.25	0
567	Shanxi province	2006年山西省临汾市长期施用钾肥下冬小麦钾素循环与调控	NPSt	7223.04	198.75	86.25	0
568	Shanxi province	2006年山西省临汾市长期施用钾肥下冬小麦钾素循环与调控	NPSt	8276.4	198.75	86.25	0
569	Shanxi province	2006年山西省临汾市长期施用钾肥下冬小麦钾素循环与调控	NPKSt	7745.16	198.75	86.25	150
570	Shanxi province	2006年山西省临汾市长期施用钾肥下冬小麦钾素循环与调控	NPKSt	8254.74	198.75	86.25	150
571	Shanxi province	2006年山西省临汾市长期施用钾肥下冬小麦钾素循环与调控	NPKSt	8955.84	198.75	86.25	150
572	Shanxi province	2006年山西省临汾市长期施用钾肥下冬小麦钾素循环与调控	NPKSt	8251.32	198.75	86.25	150
573	Shanxi province	2010年冬小麦-夏玉米轮作氮肥调控技术研究（小麦）	W0M0	5422.98	0	0	0
574	Shanxi province	2010年冬小麦-夏玉米轮作氮肥调控技术研究（小麦）	W0M0	5543.82	0	0	0
575	Shanxi province	2010年冬小麦-夏玉米轮作氮肥调控技术研究（小麦）	W0M0	5664.66	0	0	0
576	Shanxi province	2010年冬小麦-夏玉米轮作氮肥调控技术研究（小麦）	W0M0	5543.82	0	0	0
577	Shanxi province	2010年冬小麦-夏玉米轮作氮肥调控技术研究（小麦）	W40M60-1	6097.86	168	135	75
578	Shanxi province	2010年冬小麦-夏玉米轮作氮肥调控技术研究（小麦）	W40M60-1	6722.58	168	135	75
579	Shanxi province	2010年冬小麦-夏玉米轮作氮肥调控技术研究（小麦）	W40M60-1	6384	168	135	75
580	Shanxi province	2010年冬小麦-夏玉米轮作氮肥调控技术研究（小麦）	W40M60-1	6732.84	168	135	75
581	Shanxi province	2010年冬小麦-夏玉米轮作氮肥调控技术研究（小麦）	W45M55-1	6478.62	189	135	75
582	Shanxi province	2010年冬小麦-夏玉米轮作氮肥调控技术研究（小麦）	W45M55-1	6634.8	189	135	75
583	Shanxi province	2010年冬小麦-夏玉米轮作氮肥调控技术研究（小麦）	W45M55-1	6480.9	189	135	75
584	Shanxi province	2010年冬小麦-夏玉米轮作氮肥调控技术研究（小麦）	W45M55-1	6722.58	189	135	75
585	Shanxi province	2010年冬小麦-夏玉米轮作氮肥调控技术研究（小麦）	W50M50	6292.8	210	135	75
586	Shanxi province	2010年冬小麦-夏玉米轮作氮肥调控技术研究（小麦）	W50M50	6703.2	210	135	75
587	Shanxi province	2010年冬小麦-夏玉米轮作氮肥调控技术研究（小麦）	W50M50	6019.2	210	135	75
588	Shanxi province	2010年冬小麦-夏玉米轮作氮肥调控技术研究（小麦）	W50M50	6156	210	135	75
589	Shanxi province	2010年冬小麦-夏玉米轮作氮肥调控技术研究（小麦）	W55M45-1	5972.46	231	135	75
590	Shanxi province	2010年冬小麦-夏玉米轮作氮肥调控技术研究（小麦）	W55M45-1	6436.44	231	135	75
591	Shanxi province	2010年冬小麦-夏玉米轮作氮肥调控技术研究（小麦）	W55M45-1	6189.06	231	135	75
592	Shanxi province	2010年冬小麦-夏玉米轮作氮肥调控技术研究（小麦）	W55M45-1	6189.06	231	135	75
593	Shanxi province	2010年冬小麦-夏玉米轮作氮肥调控技术研究（小麦）	W60M40-1	5742.18	252	135	75
594	Shanxi province	2010年冬小麦-夏玉米轮作氮肥调控技术研究（小麦）	W60M40-1	5878.98	252	135	75
595	Shanxi province	2010年冬小麦-夏玉米轮作氮肥调控技术研究（小麦）	W60M40-1	5875.56	252	135	75
596	Shanxi province	2010年冬小麦-夏玉米轮作氮肥调控技术研究（小麦）	W60M40-1	5940.54	252	135	75
597	Shanxi province	2006年冬小麦/夏玉米轮作条件下冬小麦养分限制因子研究	OPT	8316.3	180	150	200
601	Shanxi province	2006年冬小麦/夏玉米轮作条件下冬小麦养分限制因子研究	OPT-N	5578.02	0	150	200
605	Shanxi province	2006年冬小麦/夏玉米轮作条件下冬小麦养分限制因子研究	OPT-P	7529.7	180	0	200
609	Shanxi province	2006年冬小麦/夏玉米轮作条件下冬小麦养分限制因子研究	OPT-K	7982.28	180	150	0
613	Shanxi province	2006年冬小麦/夏玉米轮作条件下冬小麦养分限制因子研究	OPT-Zn	7923	180	150	200
617	Shanxi province	2006年冬小麦/夏玉米轮作条件下冬小麦养分限制因子研究	CK	5878.98	0	0	0
440	Shandong province	2006年山东省主要土类小麦施肥长期定位试验（棕壤）	CK	1319.8	0	0	0
443	Shandong province	2006年山东省主要土类小麦施肥长期定位试验（棕壤）	N	2005	187.5	0	0
446	Shandong province	2006年山东省主要土类小麦施肥长期定位试验（棕壤）	NP	5122.8	187.5	150	0
449	Shandong province	2006年山东省主要土类小麦施肥长期定位试验（棕壤）	NK	2167.2	187.5	0	150
452	Shandong province	2006年山东省主要土类小麦施肥长期定位试验（棕壤）	PK	2895	0	150	150
455	Shandong province	2006年山东省主要土类小麦施肥长期定位试验（棕壤）	NPK	5600.9	187.5	150	150
458	Shandong province	2006年山东省主要土类小麦施肥长期定位试验（棕壤）	N1PK	5414	112.5	150	150
461	Shandong province	2006年山东省主要土类小麦施肥长期定位试验（棕壤）	N2PK	6962.5	262.5	150	150
520	Shandong province	2006年山东省小麦平衡施肥试验（海阳杜格庄村）	1-NP	6055	180	120	0
521	Shandong province	2006年山东省小麦平衡施肥试验（海阳杜格庄村）	1-NP	6400	180	120	0
522	Shandong province	2006年山东省小麦平衡施肥试验（海阳杜格庄村）	1-NP	6305	180	120	0
523	Shandong province	2006年山东省小麦平衡施肥试验（海阳杜格庄村）	2-NPK1	7075	180	120	120
524	Shandong province	2006年山东省小麦平衡施肥试验（海阳杜格庄村）	2-NPK1	7400	180	120	120
525	Shandong province	2006年山东省小麦平衡施肥试验（海阳杜格庄村）	2-NPK1	7060	180	120	120
526	Shandong province	2006年山东省小麦平衡施肥试验（海阳杜格庄村）	3-NPK2	7680	180	120	180
527	Shandong province	2006年山东省小麦平衡施肥试验（海阳杜格庄村）	3-NPK2	7870	180	120	180
528	Shandong province	2006年山东省小麦平衡施肥试验（海阳杜格庄村）	3-NPK2	7730	180	120	180
529	Shandong province	2006年山东省小麦平衡施肥试验（海阳杜格庄村）	4-NPK3	7830	180	120	240
530	Shandong province	2006年山东省小麦平衡施肥试验（海阳杜格庄村）	4-NPK3	7570	180	120	240
531	Shandong province	2006年山东省小麦平衡施肥试验（海阳杜格庄村）	4-NPK3	7900	180	120	240
532	Shandong province	2006年山东省小麦平衡施肥示范（海阳杜格庄村）	NP	6645.6	180	120	0
533	Shandong province	2006年山东省小麦平衡施肥示范（海阳杜格庄村）	NPK	7846.8	180	120	180
534	Shandong province	2006年山东省主要土类小麦施肥长期定位试验（褐土）	CK	516	0	0	0
537	Shandong province	2006年山东省主要土类小麦施肥长期定位试验（褐土）	N	280.5	187.5	0	0
540	Shandong province	2006年山东省主要土类小麦施肥长期定位试验（褐土）	NP	2640.4	187.5	150	0
543	Shandong province	2006年山东省主要土类小麦施肥长期定位试验（褐土）	NK	520.2	187.5	0	150
546	Shandong province	2006年山东省主要土类小麦施肥长期定位试验（褐土）	PK	2674.5	0	150	150
549	Shandong province	2006年山东省主要土类小麦施肥长期定位试验（褐土）	NPK	4484.3	187.5	150	150
552	Shandong province	2006年山东省主要土类小麦施肥长期定位试验（褐土）	N1PK	4625.5	112.5	150	150
555	Shandong province	2006年山东省主要土类小麦施肥长期定位试验（褐土）	N2PK	5161.4	262.5	150	150
561	Shandong province	2007年山东省小麦养分限制因子试验（海阳市成家）	1-CK	3960	0	0	0
562	Shandong province	2007年山东省小麦养分限制因子试验（海阳市成家）	1-CK	3927	0	0	0
563	Shandong province	2007年山东省小麦养分限制因子试验（海阳市成家）	1-CK	3676.5	0	0	0
564	Shandong province	2007年山东省小麦养分限制因子试验（海阳市成家）	2-OPT	6372	240	30	120
565	Shandong province	2007年山东省小麦养分限制因子试验（海阳市成家）	2-OPT	6214.5	240	30	120
566	Shandong province	2007年山东省小麦养分限制因子试验（海阳市成家）	2-OPT	6012	240	30	120
567	Shandong province	2007年山东省小麦养分限制因子试验（海阳市成家）	3-OPT-N	4294.5	0	30	120
568	Shandong province	2007年山东省小麦养分限制因子试验（海阳市成家）	3-OPT-N	3816	0	30	120
569	Shandong province	2007年山东省小麦养分限制因子试验（海阳市成家）	3-OPT-N	4765.5	0	30	120
570	Shandong province	2007年山东省小麦养分限制因子试验（海阳市成家）	4-OPT-P	4209	240	0	120
571	Shandong province	2007年山东省小麦养分限制因子试验（海阳市成家）	4-OPT-P	3679.5	240	0	120
572	Shandong province	2007年山东省小麦养分限制因子试验（海阳市成家）	4-OPT-P	3676.5	240	0	120
573	Shandong province	2007年山东省小麦养分限制因子试验（海阳市成家）	5-OPT-K	4683	240	30	0
574	Shandong province	2007年山东省小麦养分限制因子试验（海阳市成家）	5-OPT-K	4900.5	240	30	0
575	Shandong province	2007年山东省小麦养分限制因子试验（海阳市成家）	5-OPT-K	5353.5	240	30	0
576	Shandong province	2007年山东省小麦养分限制因子试验（海阳市成家）	6-FP	5562	112.5	112.5	112.5
577	Shandong province	2007年山东省小麦养分限制因子试验（海阳市成家）	6-FP	5850	112.5	112.5	112.5
578	Shandong province	2007年山东省小麦养分限制因子试验（海阳市成家）	6-FP	6234	112.5	112.5	112.5
579	Shandong province	2007年山东省小麦养分限制因子试验（海阳市成家）	7-FP-N	5829	0	112.5	112.5
580	Shandong province	2007年山东省小麦养分限制因子试验（海阳市成家）	7-FP-N	4096.5	0	112.5	112.5
581	Shandong province	2007年山东省小麦养分限制因子试验（海阳市成家）	7-FP-N	4680	0	112.5	112.5
582	Shandong province	2007年山东省小麦养分限制因子试验（海阳市成家）	8-FP-P	4618.5	112.5	0	112.5
583	Shandong province	2007年山东省小麦养分限制因子试验（海阳市成家）	8-FP-P	4357.5	112.5	0	112.5
584	Shandong province	2007年山东省小麦养分限制因子试验（海阳市成家）	8-FP-P	4167	112.5	0	112.5
585	Shandong province	2007年山东省小麦养分限制因子试验（海阳市成家）	9-FP-K	5119.5	112.5	112.5	0
586	Shandong province	2007年山东省小麦养分限制因子试验（海阳市成家）	9-FP-K	4684.5	112.5	112.5	0
587	Shandong province	2007年山东省小麦养分限制因子试验（海阳市成家）	9-FP-K	4615.5	112.5	112.5	0
594	Shandong province	2008年山东省冬小麦养分吸收规律研究（青州廉颇村）	1 CK0	5955.37	0	0	0
600	Shandong province	2008年山东省冬小麦养分吸收规律研究（青州廉颇村）	1 CK0	6239.67	0	0	0
606	Shandong province	2008年山东省冬小麦养分吸收规律研究（青州廉颇村）	1 CK0	6342.98	0	0	0
614	Shandong province	2008年山东省冬小麦养分吸收规律研究（青州廉颇村）	1 CK0	5904.13	0	0	0
618	Shandong province	2008年山东省冬小麦养分吸收规律研究（青州廉颇村）	2OPT	8035.54	240	135	90
626	Shandong province	2008年山东省冬小麦养分吸收规律研究（青州廉颇村）	2OPT	8204.13	240	135	90
632	Shandong province	2008年山东省冬小麦养分吸收规律研究（青州廉颇村）	2OPT	8719.01	240	135	90
638	Shandong province	2008年山东省冬小麦养分吸收规律研究（青州廉颇村）	2OPT	8223.14	240	135	90
642	Shandong province	2008年山东省钾肥不同基追比对小麦/玉米养分需求与供给的影响研究（小麦，青州廉颇村）	1 K0	7480	240	135	0
643	Shandong province	2008年山东省钾肥不同基追比对小麦/玉米养分需求与供给的影响研究（小麦，青州廉颇村）	1 K0	8080	240	135	0
644	Shandong province	2008年山东省钾肥不同基追比对小麦/玉米养分需求与供给的影响研究（小麦，青州廉颇村）	1 K0	7860	240	135	0
645	Shandong province	2008年山东省钾肥不同基追比对小麦/玉米养分需求与供给的影响研究（小麦，青州廉颇村）	2 K1	8760	240	135	120
646	Shandong province	2008年山东省钾肥不同基追比对小麦/玉米养分需求与供给的影响研究（小麦，青州廉颇村）	2 K1	8580	240	135	120
647	Shandong province	2008年山东省钾肥不同基追比对小麦/玉米养分需求与供给的影响研究（小麦，青州廉颇村）	2 K1	8620	240	135	120
648	Shandong province	2008年山东省钾肥不同基追比对小麦/玉米养分需求与供给的影响研究（小麦，青州廉颇村）	3 K1/2+K1/2	8200	240	135	120
649	Shandong province	2008年山东省钾肥不同基追比对小麦/玉米养分需求与供给的影响研究（小麦，青州廉颇村）	3 K1/2+K1/2	8060	240	135	120
650	Shandong province	2008年山东省钾肥不同基追比对小麦/玉米养分需求与供给的影响研究（小麦，青州廉颇村）	3 K1/2+K1/2	7840	240	135	120
651	Shandong province	2008年山东省钾肥不同基追比对小麦/玉米养分需求与供给的影响研究（小麦，青州廉颇村）	4 K7/10+K3/10	8100	240	135	120
652	Shandong province	2008年山东省钾肥不同基追比对小麦/玉米养分需求与供给的影响研究（小麦，青州廉颇村）	4 K7/10+K3/10	8060	240	135	120
653	Shandong province	2008年山东省钾肥不同基追比对小麦/玉米养分需求与供给的影响研究（小麦，青州廉颇村）	4 K7/10+K3/10	8520	240	135	120
654	Shandong province	2008年山东省氮肥不同基追比对小麦/玉米养分需求与供给的影响研究（小麦，青州廉颇村）	1 N0	6325.52	0	30	30
655	Shandong province	2008年山东省氮肥不同基追比对小麦/玉米养分需求与供给的影响研究（小麦，青州廉颇村）	1 N0	6514.34	0	30	30
656	Shandong province	2008年山东省氮肥不同基追比对小麦/玉米养分需求与供给的影响研究（小麦，青州廉颇村）	1 N0	6255.91	0	30	30
657	Shandong province	2008年山东省氮肥不同基追比对小麦/玉米养分需求与供给的影响研究（小麦，青州廉颇村）	2 N1	7447.74	240	30	30
658	Shandong province	2008年山东省氮肥不同基追比对小麦/玉米养分需求与供给的影响研究（小麦，青州廉颇村）	2 N1	7183.86	240	30	30
659	Shandong province	2008年山东省氮肥不同基追比对小麦/玉米养分需求与供给的影响研究（小麦，青州廉颇村）	2 N1	7069.91	240	30	30
660	Shandong province	2008年山东省氮肥不同基追比对小麦/玉米养分需求与供给的影响研究（小麦，青州廉颇村）	3 N1/2+N1/2	7778.32	240	30	30
661	Shandong province	2008年山东省氮肥不同基追比对小麦/玉米养分需求与供给的影响研究（小麦，青州廉颇村）	3 N1/2+N1/2	7425.57	240	30	30
662	Shandong province	2008年山东省氮肥不同基追比对小麦/玉米养分需求与供给的影响研究（小麦，青州廉颇村）	3 N1/2+N1/2	7314.34	240	30	30
663	Shandong province	2008年山东省氮肥不同基追比对小麦/玉米养分需求与供给的影响研究（小麦，青州廉颇村）	4 N1/3+N1/3+N1/3	8195.04	240	30	30
664	Shandong province	2008年山东省氮肥不同基追比对小麦/玉米养分需求与供给的影响研究（小麦，青州廉颇村）	4 N1/3+N1/3+N1/3	7972.78	240	30	30
665	Shandong province	2008年山东省氮肥不同基追比对小麦/玉米养分需求与供给的影响研究（小麦，青州廉颇村）	4 N1/3+N1/3+N1/3	7614.39	240	30	30
666	Shandong province	2008年山东省氮肥不同基追比对小麦/玉米养分需求与供给的影响研究（小麦，青州廉颇村）	5 N1/4+N1/4+N1/4+N1/4	7858.92	240	30	30
667	Shandong province	2008年山东省氮肥不同基追比对小麦/玉米养分需求与供给的影响研究（小麦，青州廉颇村）	5 N1/4+N1/4+N1/4+N1/4	7542.15	240	30	30
668	Shandong province	2008年山东省氮肥不同基追比对小麦/玉米养分需求与供给的影响研究（小麦，青州廉颇村）	5 N1/4+N1/4+N1/4+N1/4	7661.64	240	30	30
672	Shandong province	2009年山东省小麦返青期和拔节期追肥SPAD阈值的确定试验研究（青州市廉颇村）	1.N0(0+0+0)	5301.6	0	105	90
678	Shandong province	2009年山东省小麦返青期和拔节期追肥SPAD阈值的确定试验研究（青州市廉颇村）	1.N0(0+0+0)	5191.06	0	105	90
681	Shandong province	2009年山东省小麦返青期和拔节期追肥SPAD阈值的确定试验研究（青州市廉颇村）	1.N0(0+0+0)	5483.74	0	105	90
690	Shandong province	2009年山东省小麦返青期和拔节期追肥SPAD阈值的确定试验研究（青州市廉颇村）	1.N0(0+0+0)	5417.9	0	105	90
696	Shandong province	2009年山东省小麦返青期和拔节期追肥SPAD阈值的确定试验研究（青州市廉颇村）	2.N60(20+20+20)	5479.7	60	105	90
704	Shandong province	2009年山东省小麦返青期和拔节期追肥SPAD阈值的确定试验研究（青州市廉颇村）	2.N60(20+20+20)	5678.9	60	105	90
705	Shandong province	2009年山东省小麦返青期和拔节期追肥SPAD阈值的确定试验研究（青州市廉颇村）	2.N60(20+20+20)	5549.6	60	105	90
714	Shandong province	2009年山东省小麦返青期和拔节期追肥SPAD阈值的确定试验研究（青州市廉颇村）	2.N60(20+20+20)	5570.7	60	105	90
720	Shandong province	2009年山东省小麦返青期和拔节期追肥SPAD阈值的确定试验研究（青州市廉颇村）	3.N120(40+40+40)	6149.7	120	105	90
728	Shandong province	2009年山东省小麦返青期和拔节期追肥SPAD阈值的确定试验研究（青州市廉颇村）	3.N120(40+40+40)	6051.2	120	105	90
729	Shandong province	2009年山东省小麦返青期和拔节期追肥SPAD阈值的确定试验研究（青州市廉颇村）	3.N120(40+40+40)	6143.9	120	105	90
738	Shandong province	2009年山东省小麦返青期和拔节期追肥SPAD阈值的确定试验研究（青州市廉颇村）	3.N120(40+40+40)	6268.3	120	105	90
744	Shandong province	2009年山东省小麦返青期和拔节期追肥SPAD阈值的确定试验研究（青州市廉颇村）	4. N180(60+60+60)	6230.9	180	105	90
752	Shandong province	2009年山东省小麦返青期和拔节期追肥SPAD阈值的确定试验研究（青州市廉颇村）	4. N180(60+60+60)	6329.3	180	105	90
756	Shandong province	2009年山东省小麦返青期和拔节期追肥SPAD阈值的确定试验研究（青州市廉颇村）	4. N180(60+60+60)	6378.9	180	105	90
762	Shandong province	2009年山东省小麦返青期和拔节期追肥SPAD阈值的确定试验研究（青州市廉颇村）	4. N180(60+60+60)	6292.7	180	105	90
768	Shandong province	2009年山东省小麦返青期和拔节期追肥SPAD阈值的确定试验研究（青州市廉颇村）	5. N240(80+80+80)	6689.4	240	105	90
776	Shandong province	2009年山东省小麦返青期和拔节期追肥SPAD阈值的确定试验研究（青州市廉颇村）	5. N240(80+80+80)	6584.6	240	105	90
780	Shandong province	2009年山东省小麦返青期和拔节期追肥SPAD阈值的确定试验研究（青州市廉颇村）	5. N240(80+80+80)	6453.7	240	105	90
786	Shandong province	2009年山东省小麦返青期和拔节期追肥SPAD阈值的确定试验研究（青州市廉颇村）	5. N240(80+80+80)	6569.9	240	105	90
792	Shandong province	2009年山东省小麦返青期和拔节期追肥SPAD阈值的确定试验研究（青州市廉颇村）	6.N300(100+100+100)	6553.7	300	105	90
800	Shandong province	2009年山东省小麦返青期和拔节期追肥SPAD阈值的确定试验研究（青州市廉颇村）	6.N300(100+100+100)	6697.6	300	105	90
804	Shandong province	2009年山东省小麦返青期和拔节期追肥SPAD阈值的确定试验研究（青州市廉颇村）	6.N300(100+100+100)	6440.7	300	105	90
812	Shandong province	2009年山东省小麦返青期和拔节期追肥SPAD阈值的确定试验研究（青州市廉颇村）	6.N300(100+100+100)	6339	300	105	90
817	Shandong province	2009年山东省基于Nmin值的基肥用量与比例的确定小麦试验研究（青州市廉颇村）	1.N0(0+0+0)	5156.1	0	105	90
821	Shandong province	2009年山东省基于Nmin值的基肥用量与比例的确定小麦试验研究（青州市廉颇村）	1.N0(0+0+0)	4970.8	0	105	90
828	Shandong province	2009年山东省基于Nmin值的基肥用量与比例的确定小麦试验研究（青州市廉颇村）	1.N0(0+0+0)	5199.19	0	105	90
831	Shandong province	2009年山东省基于Nmin值的基肥用量与比例的确定小麦试验研究（青州市廉颇村）	1.N0(0+0+0)	5034.1	0	105	90
841	Shandong province	2009年山东省基于Nmin值的基肥用量与比例的确定小麦试验研究（青州市廉颇村）	2.N120(0+80+40)	5490.2	120	105	90
845	Shandong province	2009年山东省基于Nmin值的基肥用量与比例的确定小麦试验研究（青州市廉颇村）	2.N120(0+80+40)	5635.8	120	105	90
853	Shandong province	2009年山东省基于Nmin值的基肥用量与比例的确定小麦试验研究（青州市廉颇村）	2.N120(0+80+40)	5545.5	120	105	90
855	Shandong province	2009年山东省基于Nmin值的基肥用量与比例的确定小麦试验研究（青州市廉颇村）	2.N120(0+80+40)	5580.5	120	105	90
865	Shandong province	2009年山东省基于Nmin值的基肥用量与比例的确定小麦试验研究（青州市廉颇村）	3.N120(20+60+40)	5792.68	120	105	90
869	Shandong province	2009年山东省基于Nmin值的基肥用量与比例的确定小麦试验研究（青州市廉颇村）	3.N120(20+60+40)	5811.4	120	105	90
877	Shandong province	2009年山东省基于Nmin值的基肥用量与比例的确定小麦试验研究（青州市廉颇村）	3.N120(20+60+40)	5917.1	120	105	90
881	Shandong province	2009年山东省基于Nmin值的基肥用量与比例的确定小麦试验研究（青州市廉颇村）	3.N120(20+60+40)	5791.9	120	105	90
890	Shandong province	2009年山东省基于Nmin值的基肥用量与比例的确定小麦试验研究（青州市廉颇村）	4.N120(40+40+40)	6013	120	105	90
893	Shandong province	2009年山东省基于Nmin值的基肥用量与比例的确定小麦试验研究（青州市廉颇村）	4.N120(40+40+40)	6122	120	105	90
901	Shandong province	2009年山东省基于Nmin值的基肥用量与比例的确定小麦试验研究（青州市廉颇村）	4.N120(40+40+40)	5995.1	120	105	90
905	Shandong province	2009年山东省基于Nmin值的基肥用量与比例的确定小麦试验研究（青州市廉颇村）	4.N120(40+40+40)	5912.9	120	105	90
909	Shandong province	2009年山东省基于Nmin值的基肥用量与比例的确定小麦试验研究（青州市廉颇村）	5.N180(0+120+60)	5619.5	180	105	90
918	Shandong province	2009年山东省基于Nmin值的基肥用量与比例的确定小麦试验研究（青州市廉颇村）	5.N180(0+120+60)	5643.9	180	105	90
925	Shandong province	2009年山东省基于Nmin值的基肥用量与比例的确定小麦试验研究（青州市廉颇村）	5.N180(0+120+60)	5539	180	105	90
929	Shandong province	2009年山东省基于Nmin值的基肥用量与比例的确定小麦试验研究（青州市廉颇村）	5.N180(0+120+60)	5535	180	105	90
933	Shandong province	2009年山东省基于Nmin值的基肥用量与比例的确定小麦试验研究（青州市廉颇村）	6.N180(30+90+60)	6061.8	180	105	90
942	Shandong province	2009年山东省基于Nmin值的基肥用量与比例的确定小麦试验研究（青州市廉颇村）	6.N180(30+90+60)	6162.6	180	105	90
950	Shandong province	2009年山东省基于Nmin值的基肥用量与比例的确定小麦试验研究（青州市廉颇村）	6.N180(30+90+60)	5965.9	180	105	90
953	Shandong province	2009年山东省基于Nmin值的基肥用量与比例的确定小麦试验研究（青州市廉颇村）	6.N180(30+90+60)	6159.3	180	105	90
957	Shandong province	2009年山东省基于Nmin值的基肥用量与比例的确定小麦试验研究（青州市廉颇村）	7.N180(60+60+60)	6395.9	180	105	90
966	Shandong province	2009年山东省基于Nmin值的基肥用量与比例的确定小麦试验研究（青州市廉颇村）	7.N180(60+60+60)	6243.9	180	105	90
969	Shandong province	2009年山东省基于Nmin值的基肥用量与比例的确定小麦试验研究（青州市廉颇村）	7.N180(60+60+60)	6353.7	180	105	90
978	Shandong province	2009年山东省基于Nmin值的基肥用量与比例的确定小麦试验研究（青州市廉颇村）	7.N180(60+60+60)	6251.2	180	105	90
981	Shandong province	2008年山东省小麦-玉米养分限制因子定位试验研究（小麦，青州廉颇村）	OPT	8029.75	210	75	60
982	Shandong province	2008年山东省小麦-玉米养分限制因子定位试验研究（小麦，青州廉颇村）	OPT	8181.82	210	75	60
983	Shandong province	2008年山东省小麦-玉米养分限制因子定位试验研究（小麦，青州廉颇村）	OPT	7955.37	210	75	60
984	Shandong province	2009年山东省基于土壤测试和目标产量的OPT小麦试验研究（青州市廉颇村）	1)OPT	6960.3	240	75	90
985	Shandong province	2009年山东省基于土壤测试和目标产量的OPT小麦试验研究（青州市廉颇村）	1)OPT	7005.2	240	75	90
986	Shandong province	2009年山东省基于土壤测试和目标产量的OPT小麦试验研究（青州市廉颇村）	1)OPT	6870.8	240	75	90
987	Shandong province	2009年山东省基于土壤测试和目标产量的OPT小麦试验研究（青州市廉颇村）	2)OPT–N	5790.3	0	75	90
988	Shandong province	2009年山东省基于土壤测试和目标产量的OPT小麦试验研究（青州市廉颇村）	2)OPT–N	5530.3	0	75	90
989	Shandong province	2009年山东省基于土壤测试和目标产量的OPT小麦试验研究（青州市廉颇村）	2)OPT–N	5660.4	0	75	90
990	Shandong province	2009年山东省基于土壤测试和目标产量的OPT小麦试验研究（青州市廉颇村）	3)OPT–P	6840.3	240	0	90
991	Shandong province	2009年山东省基于土壤测试和目标产量的OPT小麦试验研究（青州市廉颇村）	3)OPT–P	6840.2	240	0	90
992	Shandong province	2009年山东省基于土壤测试和目标产量的OPT小麦试验研究（青州市廉颇村）	3)OPT–P	6686.3	240	0	90
993	Shandong province	2009年山东省基于土壤测试和目标产量的OPT小麦试验研究（青州市廉颇村）	4)OPT–K	6665.8	240	75	0
994	Shandong province	2009年山东省基于土壤测试和目标产量的OPT小麦试验研究（青州市廉颇村）	4)OPT–K	6464.2	240	75	0
995	Shandong province	2009年山东省基于土壤测试和目标产量的OPT小麦试验研究（青州市廉颇村）	4)OPT–K	6570.6	240	75	0
996	Shandong province	2009年山东省基于土壤测试和目标产量的OPT小麦试验研究（青州市廉颇村）	5)60% OPT-N	6305.6	144	75	90
997	Shandong province	2009年山东省基于土壤测试和目标产量的OPT小麦试验研究（青州市廉颇村）	5)60% OPT-N	6555.7	144	75	90
998	Shandong province	2009年山东省基于土壤测试和目标产量的OPT小麦试验研究（青州市廉颇村）	5)60% OPT-N	6470.1	144	75	90
999	Shandong province	2009年山东省基于土壤测试和目标产量的OPT小麦试验研究（青州市廉颇村）	6)FP1(农)	6695.3	80	80	80
1000	Shandong province	2009年山东省基于土壤测试和目标产量的OPT小麦试验研究（青州市廉颇村）	6)FP1(农)	6600.5	80	80	80
1001	Shandong province	2009年山东省基于土壤测试和目标产量的OPT小麦试验研究（青州市廉颇村）	6)FP1(农)	6805	80	80	80
1002	Shandong province	2009年山东省基于土壤测试和目标产量的OPT小麦试验研究（青州市廉颇村）	7)FP2(官)	6795.8	240	90	90
1003	Shandong province	2009年山东省基于土壤测试和目标产量的OPT小麦试验研究（青州市廉颇村）	7)FP2(官)	6805.4	240	90	90
1004	Shandong province	2009年山东省基于土壤测试和目标产量的OPT小麦试验研究（青州市廉颇村）	7)FP2(官)	6755	240	90	90
1011	Shandong province	2008年山东省小麦-玉米养分限制因子定位试验研究（小麦，青州廉颇村）	OPT-N	7383.47	0	75	60
1012	Shandong province	2008年山东省小麦-玉米养分限制因子定位试验研究（小麦，青州廉颇村）	OPT-N	7404.96	0	75	60
1013	Shandong province	2008年山东省小麦-玉米养分限制因子定位试验研究（小麦，青州廉颇村）	OPT-N	7691.74	0	75	60
1014	Shandong province	2008年山东省小麦-玉米养分限制因子定位试验研究（小麦，青州廉颇村）	OPT-P	7789.26	210	0	60
1015	Shandong province	2008年山东省小麦-玉米养分限制因子定位试验研究（小麦，青州廉颇村）	OPT-P	7424.79	210	0	60
1016	Shandong province	2008年山东省小麦-玉米养分限制因子定位试验研究（小麦，青州廉颇村）	OPT-P	8256.2	210	0	60
1017	Shandong province	2008年山东省小麦-玉米养分限制因子定位试验研究（小麦，青州廉颇村）	OPT-K	7631.4	210	75	0
1018	Shandong province	2008年山东省小麦-玉米养分限制因子定位试验研究（小麦，青州廉颇村）	OPT-K	7815.7	210	75	0
1019	Shandong province	2008年山东省小麦-玉米养分限制因子定位试验研究（小麦，青州廉颇村）	OPT-K	7466.12	210	75	0
1020	Shandong province	2008年山东省小麦-玉米养分限制因子定位试验研究（小麦，青州廉颇村）	FP	8114.88	222	31.5	120.75
1021	Shandong province	2008年山东省小麦-玉米养分限制因子定位试验研究（小麦，青州廉颇村）	FP	7980.99	222	31.5	120.75
1022	Shandong province	2008年山东省小麦-玉米养分限制因子定位试验研究（小麦，青州廉颇村）	FP	7858.68	222	31.5	120.75
1023	Shandong province	2008年山东省小麦-玉米养分限制因子定位试验研究（小麦，青州廉颇村）	CK0	6570.25	0	0	0
1024	Shandong province	2008年山东省小麦-玉米养分限制因子定位试验研究（小麦，青州廉颇村）	CK0	6782.64	0	0	0
1025	Shandong province	2008年山东省小麦-玉米养分限制因子定位试验研究（小麦，青州廉颇村）	CK0	6750.41	0	0	0
1027	Shandong province	2010年山东省基于Nmin值的基肥用量与比例的确定小麦试验研究（德州市平原县）	1.N0(0+0+0)	4833.3	0	105	90
1032	Shandong province	2010年山东省基于Nmin值的基肥用量与比例的确定小麦试验研究（德州市平原县）	1.N0(0+0+0)	4633.3	0	105	90
1037	Shandong province	2010年山东省基于Nmin值的基肥用量与比例的确定小麦试验研究（德州市平原县）	1.N0(0+0+0)	5000	0	105	90
1043	Shandong province	2010年山东省基于Nmin值的基肥用量与比例的确定小麦试验研究（德州市平原县）	2.N120(0+80+40)	5233.3	120	105	90
1049	Shandong province	2010年山东省基于Nmin值的基肥用量与比例的确定小麦试验研究（德州市平原县）	2.N120(0+80+40)	5400	120	105	90
1054	Shandong province	2010年山东省基于Nmin值的基肥用量与比例的确定小麦试验研究（德州市平原县）	2.N120(0+80+40)	4766.7	120	105	90
1059	Shandong province	2010年山东省基于Nmin值的基肥用量与比例的确定小麦试验研究（德州市平原县）	3.N120(20+60+40)	5600	120	105	90
1064	Shandong province	2010年山东省基于Nmin值的基肥用量与比例的确定小麦试验研究（德州市平原县）	3.N120(20+60+40)	5900	120	105	90
1069	Shandong province	2010年山东省基于Nmin值的基肥用量与比例的确定小麦试验研究（德州市平原县）	3.N120(20+60+40)	6033.3	120	105	90
1075	Shandong province	2010年山东省基于Nmin值的基肥用量与比例的确定小麦试验研究（德州市平原县）	4.N120(40+40+40)	6000	120	105	90
1080	Shandong province	2010年山东省基于Nmin值的基肥用量与比例的确定小麦试验研究（德州市平原县）	4.N120(40+40+40)	6266.7	120	105	90
1081	Shandong province	2010年山东省基于Nmin值的基肥用量与比例的确定小麦试验研究（德州市平原县）	4.N120(40+40+40)	5966.7	120	105	90
1086	Shandong province	2010年山东省基于Nmin值的基肥用量与比例的确定小麦试验研究（德州市平原县）	5.N180(0+120+60)	5366.7	180	105	90
1091	Shandong province	2010年山东省基于Nmin值的基肥用量与比例的确定小麦试验研究（德州市平原县）	5.N180(0+120+60)	5166.7	180	105	90
1097	Shandong province	2010年山东省基于Nmin值的基肥用量与比例的确定小麦试验研究（德州市平原县）	5.N180(0+120+60)	5400	180	105	90
1102	Shandong province	2010年山东省基于Nmin值的基肥用量与比例的确定小麦试验研究（德州市平原县）	6.N180(30+90+60)	5966.7	180	105	90
1107	Shandong province	2010年山东省基于Nmin值的基肥用量与比例的确定小麦试验研究（德州市平原县）	6.N180(30+90+60)	6133.3	180	105	90
1112	Shandong province	2010年山东省基于Nmin值的基肥用量与比例的确定小麦试验研究（德州市平原县）	6.N180(30+90+60)	6266.7	180	105	90
1117	Shandong province	2010年山东省基于Nmin值的基肥用量与比例的确定小麦试验研究（德州市平原县）	7.N180(60+60+60)	6500	180	105	90
1123	Shandong province	2010年山东省基于Nmin值的基肥用量与比例的确定小麦试验研究（德州市平原县）	7.N180(60+60+60)	6800	180	105	90
1129	Shandong province	2010年山东省基于Nmin值的基肥用量与比例的确定小麦试验研究（德州市平原县）	7.N180(60+60+60)	6300	180	105	90
1135	Shandong province	2010年山东省小麦返青期和拔节期追肥SPAD阈值的确定试验研究（青州市廉颇村）	1.N0(0+0+0)	5133.3	0	105	90
1140	Shandong province	2010年山东省小麦返青期和拔节期追肥SPAD阈值的确定试验研究（青州市廉颇村）	1.N0(0+0+0)	5366.7	0	105	90
1145	Shandong province	2010年山东省小麦返青期和拔节期追肥SPAD阈值的确定试验研究（青州市廉颇村）	1.N0(0+0+0)	4933.3	0	105	90
1150	Shandong province	2010年山东省小麦返青期和拔节期追肥SPAD阈值的确定试验研究（青州市廉颇村）	2.N60(20+20+20)	6066.7	60	105	90
1155	Shandong province	2010年山东省小麦返青期和拔节期追肥SPAD阈值的确定试验研究（青州市廉颇村）	2.N60(20+20+20)	5566.7	60	105	90
1160	Shandong province	2010年山东省小麦返青期和拔节期追肥SPAD阈值的确定试验研究（青州市廉颇村）	2.N60(20+20+20)	5633.3	60	105	90
1161	Shandong province	2010年山东省小麦返青期和拔节期追肥SPAD阈值的确定试验研究（青州市廉颇村）	3.N120(40+40+40)	6133.3	120	105	90
1166	Shandong province	2010年山东省小麦返青期和拔节期追肥SPAD阈值的确定试验研究（青州市廉颇村）	3.N120(40+40+40)	5766.7	120	105	90
1171	Shandong province	2010年山东省小麦返青期和拔节期追肥SPAD阈值的确定试验研究（青州市廉颇村）	3.N120(40+40+40)	6300	120	105	90
1177	Shandong province	2010年山东省小麦返青期和拔节期追肥SPAD阈值的确定试验研究（青州市廉颇村）	4. N180(60+60+60)	6400	180	105	90
1182	Shandong province	2010年山东省小麦返青期和拔节期追肥SPAD阈值的确定试验研究（青州市廉颇村）	4. N180(60+60+60)	6133.3	180	105	90
1188	Shandong province	2010年山东省小麦返青期和拔节期追肥SPAD阈值的确定试验研究（青州市廉颇村）	4. N180(60+60+60)	6633.3	180	105	90
1193	Shandong province	2010年山东省小麦返青期和拔节期追肥SPAD阈值的确定试验研究（青州市廉颇村）	5. N240(80+80+80)	6900	240	105	90
1199	Shandong province	2010年山东省小麦返青期和拔节期追肥SPAD阈值的确定试验研究（青州市廉颇村）	5. N240(80+80+80)	6733.3	240	105	90
1204	Shandong province	2010年山东省小麦返青期和拔节期追肥SPAD阈值的确定试验研究（青州市廉颇村）	5. N240(80+80+80)	7100	240	105	90
1210	Shandong province	2010年山东省小麦返青期和拔节期追肥SPAD阈值的确定试验研究（青州市廉颇村）	6.N300(100+100+100)	6966.7	300	105	90
1215	Shandong province	2010年山东省小麦返青期和拔节期追肥SPAD阈值的确定试验研究（青州市廉颇村）	6.N300(100+100+100)	6700	300	105	90
1220	Shandong province	2010年山东省小麦返青期和拔节期追肥SPAD阈值的确定试验研究（青州市廉颇村）	6.N300(100+100+100)	7266.7	300	105	90
1221	Shandong province	2010年山东省基于土壤测试和目标产量的OPT小麦试验研究（青州市廉颇村）	1)OPT	7233.33	240	75	90
1222	Shandong province	2010年山东省基于土壤测试和目标产量的OPT小麦试验研究（青州市廉颇村）	1)OPT	6300	240	75	90
1223	Shandong province	2010年山东省基于土壤测试和目标产量的OPT小麦试验研究（青州市廉颇村）	1)OPT	6566.67	240	75	90
1224	Shandong province	2010年山东省基于土壤测试和目标产量的OPT小麦试验研究（青州市廉颇村）	2)OPT–N	5200	0	75	90
1225	Shandong province	2010年山东省基于土壤测试和目标产量的OPT小麦试验研究（青州市廉颇村）	2)OPT–N	5433.33	0	75	90
1226	Shandong province	2010年山东省基于土壤测试和目标产量的OPT小麦试验研究（青州市廉颇村）	2)OPT–N	4966.67	0	75	90
1227	Shandong province	2010年山东省基于土壤测试和目标产量的OPT小麦试验研究（青州市廉颇村）	3)OPT–P	5733.33	240	0	90
1228	Shandong province	2010年山东省基于土壤测试和目标产量的OPT小麦试验研究（青州市廉颇村）	3)OPT–P	5466.67	240	0	90
1229	Shandong province	2010年山东省基于土壤测试和目标产量的OPT小麦试验研究（青州市廉颇村）	3)OPT–P	6000	240	0	90
1230	Shandong province	2010年山东省基于土壤测试和目标产量的OPT小麦试验研究（青州市廉颇村）	4)OPT–K	5600	240	75	0
1231	Shandong province	2010年山东省基于土壤测试和目标产量的OPT小麦试验研究（青州市廉颇村）	4)OPT–K	5766.67	240	75	0
1232	Shandong province	2010年山东省基于土壤测试和目标产量的OPT小麦试验研究（青州市廉颇村）	4)OPT–K	6033.33	240	75	0
1233	Shandong province	2010年山东省基于土壤测试和目标产量的OPT小麦试验研究（青州市廉颇村）	5)60% OPT-N	6600	144	75	90
1234	Shandong province	2010年山东省基于土壤测试和目标产量的OPT小麦试验研究（青州市廉颇村）	5)60% OPT-N	6766.67	144	75	90
1235	Shandong province	2010年山东省基于土壤测试和目标产量的OPT小麦试验研究（青州市廉颇村）	5)60% OPT-N	6400	144	75	90
1236	Shandong province	2010年山东省基于土壤测试和目标产量的OPT小麦试验研究（青州市廉颇村）	6)FP1(农)	6800	80	80	80
1237	Shandong province	2010年山东省基于土壤测试和目标产量的OPT小麦试验研究（青州市廉颇村）	6)FP1(农)	6933.33	80	80	80
1238	Shandong province	2010年山东省基于土壤测试和目标产量的OPT小麦试验研究（青州市廉颇村）	6)FP1(农)	6600	80	80	80
1239	Shandong province	2010年山东省基于土壤测试和目标产量的OPT小麦试验研究（青州市廉颇村）	7)FP2(官)	6700	240	90	90
1240	Shandong province	2010年山东省基于土壤测试和目标产量的OPT小麦试验研究（青州市廉颇村）	7)FP2(官)	6266.67	240	90	90
1241	Shandong province	2010年山东省基于土壤测试和目标产量的OPT小麦试验研究（青州市廉颇村）	7)FP2(官)	6366.67	240	90	90
337	Henan province	2008-2009河南新坡小麦OPT试验	1 OPT	7438	180	105	105
338	Henan province	2008-2009河南新坡小麦OPT试验	1 OPT	7659	180	105	105
339	Henan province	2008-2009河南新坡小麦OPT试验	1 OPT	7803	180	105	105
340	Henan province	2008-2009河南新坡小麦OPT试验	2 OPT-N	5243	0	105	105
341	Henan province	2008-2009河南新坡小麦OPT试验	2 OPT-N	5514	0	105	105
342	Henan province	2008-2009河南新坡小麦OPT试验	2 OPT-N	5612	0	105	105
343	Henan province	2008-2009河南新坡小麦OPT试验	3 OPT-P	6147	180	0	105
344	Henan province	2008-2009河南新坡小麦OPT试验	3 OPT-P	6224	180	0	105
345	Henan province	2008-2009河南新坡小麦OPT试验	3 OPT-P	6376	180	0	105
346	Henan province	2008-2009河南新坡小麦OPT试验	4 OPT-K	6447	180	105	0
347	Henan province	2008-2009河南新坡小麦OPT试验	4 OPT-K	6655	180	105	0
348	Henan province	2008-2009河南新坡小麦OPT试验	4 OPT-K	6829	180	105	0
349	Henan province	2008-2009河南新坡小麦OPT试验	5 FP	7135	195	75	75
350	Henan province	2008-2009河南新坡小麦OPT试验	5 FP	7242	195	75	75
351	Henan province	2008-2009河南新坡小麦OPT试验	5 FP	7303	195	75	75
352	Henan province	2008-2009河南新坡小麦OPT试验	6 CK	4549	0	0	0
353	Henan province	2008-2009河南新坡小麦OPT试验	6 CK	4857	0	0	0
354	Henan province	2008-2009河南新坡小麦OPT试验	6 CK	5013	0	0	0
355	Henan province	2008-2009河南平陵小麦OPT试验	1 OPT	7664	225	105	105
356	Henan province	2008-2009河南平陵小麦OPT试验	1 OPT	7891	225	105	105
357	Henan province	2008-2009河南平陵小麦OPT试验	1 OPT	8040	225	105	105
358	Henan province	2008-2009河南平陵小麦OPT试验	2 OPT-N	5402	0	105	105
359	Henan province	2008-2009河南平陵小麦OPT试验	2 OPT-N	5682	0	105	105
360	Henan province	2008-2009河南平陵小麦OPT试验	2 OPT-N	5782	0	105	105
361	Henan province	2008-2009河南平陵小麦OPT试验	3 OPT-P	6503	225	0	105
362	Henan province	2008-2009河南平陵小麦OPT试验	3 OPT-P	6626	225	0	105
363	Henan province	2008-2009河南平陵小麦OPT试验	3 OPT-P	6654	225	0	105
364	Henan province	2008-2009河南平陵小麦OPT试验	4 OPT-K	6643	225	105	0
365	Henan province	2008-2009河南平陵小麦OPT试验	4 OPT-K	6857	225	105	0
366	Henan province	2008-2009河南平陵小麦OPT试验	4 OPT-K	7036	225	105	0
367	Henan province	2008-2009河南平陵小麦OPT试验	5 FP	7352	195	75	75
368	Henan province	2008-2009河南平陵小麦OPT试验	5 FP	7462	195	75	75
369	Henan province	2008-2009河南平陵小麦OPT试验	5 FP	7525	195	75	75
370	Henan province	2008-2009河南平陵小麦OPT试验	6 CK	4687	0	0	0
371	Henan province	2008-2009河南平陵小麦OPT试验	6 CK	5005	0	0	0
372	Henan province	2008-2009河南平陵小麦OPT试验	6 CK	5165	0	0	0
373	Henan province	2008-2009河南朱寨小麦OPT试验	1 OPT	7552	225	105	105
374	Henan province	2008-2009河南朱寨小麦OPT试验	1 OPT	7776	225	105	105
375	Henan province	2008-2009河南朱寨小麦OPT试验	1 OPT	7922	225	105	105
376	Henan province	2008-2009河南朱寨小麦OPT试验	2 OPT-N	5323	0	105	105
377	Henan province	2008-2009河南朱寨小麦OPT试验	2 OPT-N	5599	0	105	105
378	Henan province	2008-2009河南朱寨小麦OPT试验	2 OPT-N	5698	0	105	105
379	Henan province	2008-2009河南朱寨小麦OPT试验	3 OPT-P	6324	225	0	105
380	Henan province	2008-2009河南朱寨小麦OPT试验	3 OPT-P	6403	225	0	105
381	Henan province	2008-2009河南朱寨小麦OPT试验	3 OPT-P	6473	225	0	105
382	Henan province	2008-2009河南朱寨小麦OPT试验	4 OPT-K	6546	225	105	0
383	Henan province	2008-2009河南朱寨小麦OPT试验	4 OPT-K	6757	225	105	0
384	Henan province	2008-2009河南朱寨小麦OPT试验	4 OPT-K	6933	225	105	0
385	Henan province	2008-2009河南朱寨小麦OPT试验	5 FP	7244	195	75	75
386	Henan province	2008-2009河南朱寨小麦OPT试验	5 FP	7353	195	75	75
387	Henan province	2008-2009河南朱寨小麦OPT试验	5 FP	7415	195	75	75
388	Henan province	2008-2009河南朱寨小麦OPT试验	6 CK	4618	0	0	0
389	Henan province	2008-2009河南朱寨小麦OPT试验	6 CK	4931	0	0	0
390	Henan province	2008-2009河南朱寨小麦OPT试验	6 CK	5089	0	0	0
391	Henan province	2008-2009河南平陵小麦氮素用量试验	CK	4761	0	0	0
392	Henan province	2008-2009河南平陵小麦氮素用量试验	CK	4902	0	0	0
393	Henan province	2008-2009河南平陵小麦氮素用量试验	CK	4964	0	0	0
394	Henan province	2008-2009河南平陵小麦氮素用量试验	N0P75K60	6617	0	75	60
395	Henan province	2008-2009河南平陵小麦氮素用量试验	N0P75K60	6835	0	75	60
396	Henan province	2008-2009河南平陵小麦氮素用量试验	N0P75K60	6960	0	75	60
397	Henan province	2008-2009河南平陵小麦氮素用量试验	N135P75K60	6997	135	75	60
398	Henan province	2008-2009河南平陵小麦氮素用量试验	N135P75K60	7167	135	75	60
399	Henan province	2008-2009河南平陵小麦氮素用量试验	N135P75K60	7220	135	75	60
400	Henan province	2008-2009河南平陵小麦氮素用量试验	N180P75K60	7232	180	75	60
401	Henan province	2008-2009河南平陵小麦氮素用量试验	N180P75K60	7379	180	75	60
402	Henan province	2008-2009河南平陵小麦氮素用量试验	N180P75K60	7503	180	75	60
403	Henan province	2008-2009河南平陵小麦氮素用量试验	N225P75K60	7511	225	75	60
404	Henan province	2008-2009河南平陵小麦氮素用量试验	N225P75K60	7609	225	75	60
405	Henan province	2008-2009河南平陵小麦氮素用量试验	N225P75K60	7689	225	75	60
406	Henan province	2008-2009河南平陵小麦氮素用量试验	N270P75K60	7352	270	75	60
407	Henan province	2008-2009河南平陵小麦氮素用量试验	N270P75K60	7473	270	75	60
408	Henan province	2008-2009河南平陵小麦氮素用量试验	N270P75K60	7599	270	75	60
409	Henan province	2008年河南省浚县冬小麦养分限制因子试验	OPT	7427.5	240	105	90
410	Henan province	2008年河南省浚县冬小麦养分限制因子试验	OPT	7572.5	240	105	90
411	Henan province	2008年河南省浚县冬小麦养分限制因子试验	OPT	7402.5	240	105	90
412	Henan province	2008年河南省浚县冬小麦养分限制因子试验	OPT-N	6942.5	0	105	90
413	Henan province	2008年河南省浚县冬小麦养分限制因子试验	OPT-N	5672.5	0	105	90
414	Henan province	2008年河南省浚县冬小麦养分限制因子试验	OPT-N	6682.5	0	105	90
415	Henan province	2008年河南省浚县冬小麦养分限制因子试验	OPT-P	6670	240	0	90
416	Henan province	2008年河南省浚县冬小麦养分限制因子试验	OPT-P	7192.5	240	0	90
417	Henan province	2008年河南省浚县冬小麦养分限制因子试验	OPT-P	6692.5	240	0	90
418	Henan province	2008年河南省浚县冬小麦养分限制因子试验	OPT-K	7090	240	105	0
419	Henan province	2008年河南省浚县冬小麦养分限制因子试验	OPT-K	7042.5	240	105	0
420	Henan province	2008年河南省浚县冬小麦养分限制因子试验	OPT-K	7045	240	105	0
421	Henan province	2008年河南省浚县冬小麦养分限制因子试验	CK	5800	0	0	0
422	Henan province	2008年河南省浚县冬小麦养分限制因子试验	CK	5165	0	0	0
423	Henan province	2008年河南省浚县冬小麦养分限制因子试验	CK	6007.5	0	0	0
424	Henan province	2008年河南省浚县冬小麦养分限制因子试验	FP	7457.5	270	90	0
425	Henan province	2008年河南省浚县冬小麦养分限制因子试验	FP	7370	270	90	0
426	Henan province	2008年河南省浚县冬小麦养分限制因子试验	FP	6915	270	90	0
427	Henan province	2008年河南省浚县冬小麦氮肥基追比试验	N3	7840	240	105	90
428	Henan province	2008年河南省浚县冬小麦氮肥基追比试验	N3	7485	240	105	90
429	Henan province	2008年河南省浚县冬小麦氮肥基追比试验	N3	7655	240	105	90
430	Henan province	2008年河南省浚县冬小麦氮肥基追比试验	N4	7807.5	240	105	90
431	Henan province	2008年河南省浚县冬小麦氮肥基追比试验	N4	7252.5	240	105	90
432	Henan province	2008年河南省浚县冬小麦氮肥基追比试验	N4	7610	240	105	90
433	Henan province	2008年河南省浚县冬小麦氮肥基追比试验	N0	6467.5	0	105	90
434	Henan province	2008年河南省浚县冬小麦氮肥基追比试验	N0	6812.5	0	105	90
435	Henan province	2008年河南省浚县冬小麦氮肥基追比试验	N0	6555	0	105	90
436	Henan province	2008年河南省浚县冬小麦氮肥基追比试验	N1	6835	240	105	90
437	Henan province	2008年河南省浚县冬小麦氮肥基追比试验	N1	7032.5	240	105	90
438	Henan province	2008年河南省浚县冬小麦氮肥基追比试验	N1	6657.5	240	105	90
439	Henan province	2008年河南省浚县冬小麦氮肥基追比试验	N2	7347.5	240	105	90
440	Henan province	2008年河南省浚县冬小麦氮肥基追比试验	N2	7382.5	240	105	90
441	Henan province	2008年河南省浚县冬小麦氮肥基追比试验	N2	7785	240	105	90
442	Henan province	2008年河南省浚县冬小麦钾肥基追比试验	K0	6810	240	105	0
443	Henan province	2008年河南省浚县冬小麦钾肥基追比试验	K0	6910	240	105	0
444	Henan province	2008年河南省浚县冬小麦钾肥基追比试验	K0	6842.5	240	105	0
445	Henan province	2008年河南省浚县冬小麦钾肥基追比试验	K1	7327	240	105	90
446	Henan province	2008年河南省浚县冬小麦钾肥基追比试验	K1	7385.5	240	105	90
447	Henan province	2008年河南省浚县冬小麦钾肥基追比试验	K1	7402.5	240	105	90
448	Henan province	2008年河南省浚县冬小麦钾肥基追比试验	K2	7347.5	240	105	90
449	Henan province	2008年河南省浚县冬小麦钾肥基追比试验	K2	7382.5	240	105	90
450	Henan province	2008年河南省浚县冬小麦钾肥基追比试验	K2	7785	240	105	90
451	Henan province	2008年河南省浚县冬小麦钾肥基追比试验	K3	7125	240	105	90
452	Henan province	2008年河南省浚县冬小麦钾肥基追比试验	K3	7087.5	240	105	90
453	Henan province	2008年河南省浚县冬小麦钾肥基追比试验	K3	7065	240	105	90
454	Henan province	2008年河南省浚县冬小麦需肥规律试验	OPT	7655	240	105	90
455	Henan province	2008年河南省浚县冬小麦需肥规律试验	OPT	7465	240	105	90
456	Henan province	2008年河南省浚县冬小麦需肥规律试验	OPT	6980	240	105	90
457	Henan province	2008年河南省浚县冬小麦需肥规律试验	CK	5800	0	0	0
458	Henan province	2008年河南省浚县冬小麦需肥规律试验	CK	5165	0	0	0
459	Henan province	2008年河南省浚县冬小麦需肥规律试验	CK	6007.5	0	0	0
460	Henan province	2009年河南省浚县冬小麦氮肥运筹试验	N0	8911.84	0	90	90
461	Henan province	2009年河南省浚县冬小麦氮肥运筹试验	N0	8997.37	0	90	90
462	Henan province	2009年河南省浚县冬小麦氮肥运筹试验	N0	8843.42	0	90	90
463	Henan province	2009年河南省浚县冬小麦氮肥运筹试验	N0	8894.74	0	90	90
464	Henan province	2009年河南省浚县冬小麦氮肥运筹试验	N1	9527.63	120	90	90
465	Henan province	2009年河南省浚县冬小麦氮肥运筹试验	N1	9322.37	120	90	90
466	Henan province	2009年河南省浚县冬小麦氮肥运筹试验	N1	9356.58	120	90	90
467	Henan province	2009年河南省浚县冬小麦氮肥运筹试验	N1	9561.84	120	90	90
468	Henan province	2009年河南省浚县冬小麦氮肥运筹试验	N2	9476.32	120	90	90
469	Henan province	2009年河南省浚县冬小麦氮肥运筹试验	N2	9715.79	120	90	90
470	Henan province	2009年河南省浚县冬小麦氮肥运筹试验	N2	9236.84	120	90	90
471	Henan province	2009年河南省浚县冬小麦氮肥运筹试验	N2	9578.95	120	90	90
472	Henan province	2009年河南省浚县冬小麦氮肥运筹试验	N3	9664.47	120	90	90
473	Henan province	2009年河南省浚县冬小麦氮肥运筹试验	N3	9869.74	120	90	90
474	Henan province	2009年河南省浚县冬小麦氮肥运筹试验	N3	10092.1	120	90	90
475	Henan province	2009年河南省浚县冬小麦氮肥运筹试验	N3	9955.26	120	90	90
476	Henan province	2009年河南省浚县冬小麦氮肥运筹试验	N4	9732.89	180	90	90
477	Henan province	2009年河南省浚县冬小麦氮肥运筹试验	N4	10297.4	180	90	90
478	Henan province	2009年河南省浚县冬小麦氮肥运筹试验	N4	10365.8	180	90	90
479	Henan province	2009年河南省浚县冬小麦氮肥运筹试验	N4	10109.2	180	90	90
480	Henan province	2009年河南省浚县冬小麦氮肥运筹试验	N5	9804.21	180	90	90
481	Henan province	2009年河南省浚县冬小麦氮肥运筹试验	N5	10080.3	180	90	90
482	Henan province	2009年河南省浚县冬小麦氮肥运筹试验	N5	9675.79	180	90	90
483	Henan province	2009年河南省浚县冬小麦氮肥运筹试验	N5	9622.89	180	90	90
484	Henan province	2009年河南省浚县冬小麦氮肥运筹试验	N6	9903.95	180	90	90
485	Henan province	2009年河南省浚县冬小麦氮肥运筹试验	N6	9938.16	180	90	90
486	Henan province	2009年河南省浚县冬小麦氮肥运筹试验	N6	10075	180	90	90
487	Henan province	2009年河南省浚县冬小麦氮肥运筹试验	N6	10211.8	180	90	90
488	Henan province	2009年河南省浚县冬小麦氮肥用量试验	N0	8911.84	0	90	90
489	Henan province	2009年河南省浚县冬小麦氮肥用量试验	N0	8997.37	0	90	90
490	Henan province	2009年河南省浚县冬小麦氮肥用量试验	N0	8843.42	0	90	90
491	Henan province	2009年河南省浚县冬小麦氮肥用量试验	N0	8894.74	0	90	90
492	Henan province	2009年河南省浚县冬小麦氮肥用量试验	N1	9168.42	60	90	90
493	Henan province	2009年河南省浚县冬小麦氮肥用量试验	N1	9065.79	60	90	90
494	Henan province	2009年河南省浚县冬小麦氮肥用量试验	N1	9253.95	60	90	90
495	Henan province	2009年河南省浚县冬小麦氮肥用量试验	N1	9236.84	60	90	90
496	Henan province	2009年河南省浚县冬小麦氮肥用量试验	N2	9664.47	120	90	90
497	Henan province	2009年河南省浚县冬小麦氮肥用量试验	N2	9869.74	120	90	90
498	Henan province	2009年河南省浚县冬小麦氮肥用量试验	N2	10092.1	120	90	90
499	Henan province	2009年河南省浚县冬小麦氮肥用量试验	N2	9955.26	120	90	90
500	Henan province	2009年河南省浚县冬小麦氮肥用量试验	N3	9903.95	180	90	90
501	Henan province	2009年河南省浚县冬小麦氮肥用量试验	N3	9938.16	180	90	90
502	Henan province	2009年河南省浚县冬小麦氮肥用量试验	N3	10075	180	90	90
503	Henan province	2009年河南省浚县冬小麦氮肥用量试验	N3	10211.8	180	90	90
504	Henan province	2009年河南省浚县冬小麦氮肥用量试验	N4	9869.74	240	90	90
505	Henan province	2009年河南省浚县冬小麦氮肥用量试验	N4	9852.63	240	90	90
506	Henan province	2009年河南省浚县冬小麦氮肥用量试验	N4	10179	240	90	90
507	Henan province	2009年河南省浚县冬小麦氮肥用量试验	N4	9767.11	240	90	90
508	Henan province	2009年河南省浚县冬小麦氮肥用量试验	N5	9448.95	300	90	90
509	Henan province	2009年河南省浚县冬小麦氮肥用量试验	N5	9407.89	300	90	90
510	Henan province	2009年河南省浚县冬小麦氮肥用量试验	N5	9476.32	300	90	90
511	Henan province	2009年河南省浚县冬小麦氮肥用量试验	N5	9647.37	300	90	90
544	Henan province	2002-2003小麦河南省洛阳孟津县送庄乡朱寨村养分监测村OPT试验	NPK	6243	180	120	120
545	Henan province	2002-2003小麦河南省洛阳孟津县送庄乡朱寨村养分监测村OPT试验	NPK	6120	180	120	120
546	Henan province	2002-2003小麦河南省洛阳孟津县送庄乡朱寨村养分监测村OPT试验	NPK	5637	180	120	120
547	Henan province	2002-2003小麦河南省洛阳孟津县送庄乡朱寨村养分监测村OPT试验	PK	4950	0	120	120
548	Henan province	2002-2003小麦河南省洛阳孟津县送庄乡朱寨村养分监测村OPT试验	PK	4350	0	120	120
549	Henan province	2002-2003小麦河南省洛阳孟津县送庄乡朱寨村养分监测村OPT试验	PK	3827	0	120	120
550	Henan province	2002-2003小麦河南省洛阳孟津县送庄乡朱寨村养分监测村OPT试验	NK	5184	180	0	120
551	Henan province	2002-2003小麦河南省洛阳孟津县送庄乡朱寨村养分监测村OPT试验	NK	4397	180	0	120
552	Henan province	2002-2003小麦河南省洛阳孟津县送庄乡朱寨村养分监测村OPT试验	NK	5045	180	0	120
553	Henan province	2002-2003小麦河南省洛阳孟津县送庄乡朱寨村养分监测村OPT试验	NP	5820	180	120	0
554	Henan province	2002-2003小麦河南省洛阳孟津县送庄乡朱寨村养分监测村OPT试验	NP	5465	180	120	0
555	Henan province	2002-2003小麦河南省洛阳孟津县送庄乡朱寨村养分监测村OPT试验	NP	5456	180	120	0
556	Henan province	2002-2003小麦河南省洛阳孟津县送庄乡朱寨村养分监测村OPT试验	CK	3722	0	0	0
557	Henan province	2002-2003小麦河南省洛阳孟津县送庄乡朱寨村养分监测村OPT试验	CK	3240	0	0	0
558	Henan province	2002-2003小麦河南省洛阳孟津县送庄乡朱寨村养分监测村OPT试验	CK	2790	0	0	0
575	Henan province	2002-2003小麦河南省驻马店遂平县和兴乡养分村OPT试验	OPT	3950	180	120	120
576	Henan province	2002-2003小麦河南省驻马店遂平县和兴乡养分村OPT试验	OPT	4150	180	120	120
577	Henan province	2002-2003小麦河南省驻马店遂平县和兴乡养分村OPT试验	OPT	4250	180	120	120
578	Henan province	2002-2003小麦河南省驻马店遂平县和兴乡养分村OPT试验	OPT-N	3800	0	120	120
579	Henan province	2002-2003小麦河南省驻马店遂平县和兴乡养分村OPT试验	OPT-N	3650	0	120	120
580	Henan province	2002-2003小麦河南省驻马店遂平县和兴乡养分村OPT试验	OPT-N	3900	0	120	120
581	Henan province	2002-2003小麦河南省驻马店遂平县和兴乡养分村OPT试验	OPT-P	3350	180	0	120
582	Henan province	2002-2003小麦河南省驻马店遂平县和兴乡养分村OPT试验	OPT-P	3400	180	0	120
583	Henan province	2002-2003小麦河南省驻马店遂平县和兴乡养分村OPT试验	OPT-P	3650	180	0	120
584	Henan province	2002-2003小麦河南省驻马店遂平县和兴乡养分村OPT试验	OPT-K	3400	180	120	0
585	Henan province	2002-2003小麦河南省驻马店遂平县和兴乡养分村OPT试验	OPT-K	3200	180	120	0
586	Henan province	2002-2003小麦河南省驻马店遂平县和兴乡养分村OPT试验	OPT-K	3550	180	120	0
587	Henan province	2002-2003小麦河南省驻马店遂平县和兴乡养分村OPT试验	CK	3700	0	0	0
588	Henan province	2002-2003小麦河南省驻马店遂平县和兴乡养分村OPT试验	CK	3550	0	0	0
589	Henan province	2002-2003小麦河南省驻马店遂平县和兴乡养分村OPT试验	CK	3450	0	0	0
590	Henan province	2003-2004小麦河南驻马店遂平和兴OPT	opt-ck	3352.5	0	0	0
591	Henan province	2003-2004小麦河南驻马店遂平和兴OPT	opt-ck	3202.5	0	0	0
592	Henan province	2003-2004小麦河南驻马店遂平和兴OPT	opt-ck	3252	0	0	0
593	Henan province	2003-2004小麦河南驻马店遂平和兴OPT	opt-N	3451.5	0	120	120
594	Henan province	2003-2004小麦河南驻马店遂平和兴OPT	opt-N	3552	0	120	120
595	Henan province	2003-2004小麦河南驻马店遂平和兴OPT	opt-N	3252	0	120	120
596	Henan province	2003-2004小麦河南驻马店遂平和兴OPT	opt-P	8539.5	225	0	120
597	Henan province	2003-2004小麦河南驻马店遂平和兴OPT	opt-P	7954.5	225	0	120
598	Henan province	2003-2004小麦河南驻马店遂平和兴OPT	opt-P	7704	225	0	120
599	Henan province	2003-2004小麦河南驻马店遂平和兴OPT	opt-K	7704	225	120	0
600	Henan province	2003-2004小麦河南驻马店遂平和兴OPT	opt-K	7453.5	225	120	0
601	Henan province	2003-2004小麦河南驻马店遂平和兴OPT	opt-K	7653	225	120	0
602	Henan province	2003-2004小麦河南驻马店遂平和兴OPT	optNPK	8754	225	120	120
603	Henan province	2003-2004小麦河南驻马店遂平和兴OPT	optNPK	8404.5	225	120	120
604	Henan province	2003-2004小麦河南驻马店遂平和兴OPT	optNPK	8505	225	120	120
623	Henan province	2004-2005小麦河南洛阳孟津OPT	opt-ck	6720	0	0	0
624	Henan province	2004-2005小麦河南洛阳孟津OPT	opt-ck	7230	0	0	0
625	Henan province	2004-2005小麦河南洛阳孟津OPT	opt-ck	6945	0	0	0
626	Henan province	2004-2005小麦河南洛阳孟津OPT	opt-N	6930	0	120	120
627	Henan province	2004-2005小麦河南洛阳孟津OPT	opt-N	7305	0	120	120
628	Henan province	2004-2005小麦河南洛阳孟津OPT	opt-N	7320	0	120	120
629	Henan province	2004-2005小麦河南洛阳孟津OPT	opt-P	7815	180	0	120
630	Henan province	2004-2005小麦河南洛阳孟津OPT	opt-P	7725	180	0	120
631	Henan province	2004-2005小麦河南洛阳孟津OPT	opt-P	8040	180	0	120
632	Henan province	2004-2005小麦河南洛阳孟津OPT	opt-K	7775	180	120	0
633	Henan province	2004-2005小麦河南洛阳孟津OPT	opt-K	7785	180	120	0
634	Henan province	2004-2005小麦河南洛阳孟津OPT	opt-K	7810	180	120	0
635	Henan province	2004-2005小麦河南洛阳孟津OPT	optNPK	8430	180	120	120
636	Henan province	2004-2005小麦河南洛阳孟津OPT	optNPK	8355	180	120	120
637	Henan province	2004-2005小麦河南洛阳孟津OPT	optNPK	8535	180	120	120
638	Henan province	2004-2005小麦河南驻马店遂平和兴OPT	opt-ck	3190	0	0	0
639	Henan province	2004-2005小麦河南驻马店遂平和兴OPT	opt-ck	3170	0	0	0
640	Henan province	2004-2005小麦河南驻马店遂平和兴OPT	opt-ck	3255	0	0	0
641	Henan province	2004-2005小麦河南驻马店遂平和兴OPT	opt-N	3498	0	120	120
642	Henan province	2004-2005小麦河南驻马店遂平和兴OPT	opt-N	3482	0	120	120
643	Henan province	2004-2005小麦河南驻马店遂平和兴OPT	opt-N	3580	0	120	120
644	Henan province	2004-2005小麦河南驻马店遂平和兴OPT	opt-P	7660	180	0	120
645	Henan province	2004-2005小麦河南驻马店遂平和兴OPT	opt-P	7620	180	0	120
646	Henan province	2004-2005小麦河南驻马店遂平和兴OPT	opt-P	7856	180	0	120
647	Henan province	2004-2005小麦河南驻马店遂平和兴OPT	opt-K	7388	180	120	0
648	Henan province	2004-2005小麦河南驻马店遂平和兴OPT	opt-K	7376	180	120	0
649	Henan province	2004-2005小麦河南驻马店遂平和兴OPT	opt-K	7367	180	120	0
650	Henan province	2004-2005小麦河南驻马店遂平和兴OPT	optNPK	8290	180	120	120
651	Henan province	2004-2005小麦河南驻马店遂平和兴OPT	optNPK	8302	180	120	120
652	Henan province	2004-2005小麦河南驻马店遂平和兴OPT	optNPK	8275	180	120	120
674	Henan province	2005-2006小麦驻马店市遂平县和兴乡和兴村opt试验	opt	7620	225	120	180
675	Henan province	2005-2006小麦驻马店市遂平县和兴乡和兴村opt试验	opt	7650	225	120	180
676	Henan province	2005-2006小麦驻马店市遂平县和兴乡和兴村opt试验	opt	7905	225	120	180
677	Henan province	2005-2006小麦驻马店市遂平县和兴乡和兴村opt试验	opt-N	5100	0	120	180
678	Henan province	2005-2006小麦驻马店市遂平县和兴乡和兴村opt试验	opt-N	4935	0	120	180
679	Henan province	2005-2006小麦驻马店市遂平县和兴乡和兴村opt试验	opt-N	4815	0	120	180
680	Henan province	2005-2006小麦驻马店市遂平县和兴乡和兴村opt试验	opt-P	6870	225	0	180
681	Henan province	2005-2006小麦驻马店市遂平县和兴乡和兴村opt试验	opt-P	6720	225	0	180
682	Henan province	2005-2006小麦驻马店市遂平县和兴乡和兴村opt试验	opt-P	6660	225	0	180
683	Henan province	2005-2006小麦驻马店市遂平县和兴乡和兴村opt试验	opt-K	6225	225	120	0
684	Henan province	2005-2006小麦驻马店市遂平县和兴乡和兴村opt试验	opt-K	6105	225	120	0
685	Henan province	2005-2006小麦驻马店市遂平县和兴乡和兴村opt试验	opt-K	6120	225	120	0
686	Henan province	2005-2006小麦驻马店市遂平县和兴乡和兴村opt试验	ck	4425	0	0	0
687	Henan province	2005-2006小麦驻马店市遂平县和兴乡和兴村opt试验	ck	4185	0	0	0
688	Henan province	2005-2006小麦驻马店市遂平县和兴乡和兴村opt试验	ck	3990	0	0	0
689	Henan province	2005-2006小麦洛阳孟津县送庄乡朱寨村opt试验	opt	7500	225	120	180
690	Henan province	2005-2006小麦洛阳孟津县送庄乡朱寨村opt试验	opt	7320	225	120	180
691	Henan province	2005-2006小麦洛阳孟津县送庄乡朱寨村opt试验	opt	7230	225	120	180
692	Henan province	2005-2006小麦洛阳孟津县送庄乡朱寨村opt试验	opt-N	5175	0	120	180
693	Henan province	2005-2006小麦洛阳孟津县送庄乡朱寨村opt试验	opt-N	5370	0	120	180
694	Henan province	2005-2006小麦洛阳孟津县送庄乡朱寨村opt试验	opt-N	5205	0	120	180
695	Henan province	2005-2006小麦洛阳孟津县送庄乡朱寨村opt试验	opt-P	6375	225	0	180
696	Henan province	2005-2006小麦洛阳孟津县送庄乡朱寨村opt试验	opt-P	6570	225	0	180
697	Henan province	2005-2006小麦洛阳孟津县送庄乡朱寨村opt试验	opt-P	6405	225	0	180
698	Henan province	2005-2006小麦洛阳孟津县送庄乡朱寨村opt试验	opt-K	6075	225	120	0
699	Henan province	2005-2006小麦洛阳孟津县送庄乡朱寨村opt试验	opt-K	5955	225	120	0
700	Henan province	2005-2006小麦洛阳孟津县送庄乡朱寨村opt试验	opt-K	5970	225	120	0
701	Henan province	2005-2006小麦洛阳孟津县送庄乡朱寨村opt试验	ck	4650	0	0	0
702	Henan province	2005-2006小麦洛阳孟津县送庄乡朱寨村opt试验	ck	4200	0	0	0
703	Henan province	2005-2006小麦洛阳孟津县送庄乡朱寨村opt试验	ck	4875	0	0	0
704	Henan province	2005-2006小麦南阳市农科所opt试验	opt	6900	225	120	180
705	Henan province	2005-2006小麦南阳市农科所opt试验	opt	7200	225	120	180
706	Henan province	2005-2006小麦南阳市农科所opt试验	opt	7275	225	120	180
707	Henan province	2005-2006小麦南阳市农科所opt试验	opt-N	5775	0	120	180
708	Henan province	2005-2006小麦南阳市农科所opt试验	opt-N	5535	0	120	180
709	Henan province	2005-2006小麦南阳市农科所opt试验	opt-N	5475	0	120	180
710	Henan province	2005-2006小麦南阳市农科所opt试验	opt-P	6015	225	0	180
711	Henan province	2005-2006小麦南阳市农科所opt试验	opt-P	6120	225	0	180
712	Henan province	2005-2006小麦南阳市农科所opt试验	opt-P	6270	225	0	180
713	Henan province	2005-2006小麦南阳市农科所opt试验	opt-K	6450	225	120	0
714	Henan province	2005-2006小麦南阳市农科所opt试验	opt-K	6570	225	120	0
715	Henan province	2005-2006小麦南阳市农科所opt试验	opt-K	6870	225	120	0
716	Henan province	2005-2006小麦南阳市农科所opt试验	ck	4950	0	0	0
717	Henan province	2005-2006小麦南阳市农科所opt试验	ck	5175	0	0	0
718	Henan province	2005-2006小麦南阳市农科所opt试验	ck	4635	0	0	0
719	Henan province	2005-2006小麦新乡市延津县平陵村opt试验	opt	7200	225	120	180
720	Henan province	2005-2006小麦新乡市延津县平陵村opt试验	opt	7350	225	120	180
721	Henan province	2005-2006小麦新乡市延津县平陵村opt试验	opt	7500	225	120	180
722	Henan province	2005-2006小麦新乡市延津县平陵村opt试验	opt-N	5400	0	120	180
723	Henan province	2005-2006小麦新乡市延津县平陵村opt试验	opt-N	5475	0	120	180
724	Henan province	2005-2006小麦新乡市延津县平陵村opt试验	opt-N	4875	0	120	180
725	Henan province	2005-2006小麦新乡市延津县平陵村opt试验	opt-P	6600	225	0	180
726	Henan province	2005-2006小麦新乡市延津县平陵村opt试验	opt-P	6390	225	0	180
727	Henan province	2005-2006小麦新乡市延津县平陵村opt试验	opt-P	6585	225	0	180
728	Henan province	2005-2006小麦新乡市延津县平陵村opt试验	opt-K	6075	225	120	0
729	Henan province	2005-2006小麦新乡市延津县平陵村opt试验	opt-K	6465	225	120	0
730	Henan province	2005-2006小麦新乡市延津县平陵村opt试验	opt-K	5910	225	120	0
731	Henan province	2005-2006小麦新乡市延津县平陵村opt试验	ck	4500	0	0	0
732	Henan province	2005-2006小麦新乡市延津县平陵村opt试验	ck	4560	0	0	0
733	Henan province	2005-2006小麦新乡市延津县平陵村opt试验	ck	4890	0	0	0
734	Henan province	2005-2006小麦驻马店市驿城区水屯镇新坡村opt试验	opt	7125	225	120	180
735	Henan province	2005-2006小麦驻马店市驿城区水屯镇新坡村opt试验	opt	7230	225	120	180
736	Henan province	2005-2006小麦驻马店市驿城区水屯镇新坡村opt试验	opt	7245	225	120	180
737	Henan province	2005-2006小麦驻马店市驿城区水屯镇新坡村opt试验	opt-N	4275	0	120	180
738	Henan province	2005-2006小麦驻马店市驿城区水屯镇新坡村opt试验	opt-N	4635	0	120	180
739	Henan province	2005-2006小麦驻马店市驿城区水屯镇新坡村opt试验	opt-N	4590	0	120	180
740	Henan province	2005-2006小麦驻马店市驿城区水屯镇新坡村opt试验	opt-P	6120	225	0	180
741	Henan province	2005-2006小麦驻马店市驿城区水屯镇新坡村opt试验	opt-P	6225	225	0	180
742	Henan province	2005-2006小麦驻马店市驿城区水屯镇新坡村opt试验	opt-P	6555	225	0	180
743	Henan province	2005-2006小麦驻马店市驿城区水屯镇新坡村opt试验	opt-K	5910	225	120	0
744	Henan province	2005-2006小麦驻马店市驿城区水屯镇新坡村opt试验	opt-K	5790	225	120	0
745	Henan province	2005-2006小麦驻马店市驿城区水屯镇新坡村opt试验	opt-K	5400	225	120	0
746	Henan province	2005-2006小麦驻马店市驿城区水屯镇新坡村opt试验	ck	3675	0	0	0
747	Henan province	2005-2006小麦驻马店市驿城区水屯镇新坡村opt试验	ck	3915	0	0	0
748	Henan province	2005-2006小麦驻马店市驿城区水屯镇新坡村opt试验	ck	3660	0	0	0
918	Henan province	2006-2007洛阳孟津县送庄乡朱寨村优质小麦OPT试验	OPT	8331	225	120	180
919	Henan province	2006-2007洛阳孟津县送庄乡朱寨村优质小麦OPT试验	OPT	8403	225	120	180
920	Henan province	2006-2007洛阳孟津县送庄乡朱寨村优质小麦OPT试验	OPT	8420	225	120	180
921	Henan province	2006-2007洛阳孟津县送庄乡朱寨村优质小麦OPT试验	OPT-N	5840	0	120	180
922	Henan province	2006-2007洛阳孟津县送庄乡朱寨村优质小麦OPT试验	OPT-N	5885	0	120	180
923	Henan province	2006-2007洛阳孟津县送庄乡朱寨村优质小麦OPT试验	OPT-N	5931	0	120	180
924	Henan province	2006-2007洛阳孟津县送庄乡朱寨村优质小麦OPT试验	OPT-P	6318	225	0	180
925	Henan province	2006-2007洛阳孟津县送庄乡朱寨村优质小麦OPT试验	OPT-P	6245	225	0	180
926	Henan province	2006-2007洛阳孟津县送庄乡朱寨村优质小麦OPT试验	OPT-P	6156	225	0	180
927	Henan province	2006-2007洛阳孟津县送庄乡朱寨村优质小麦OPT试验	OPT-K	6903	225	120	0
928	Henan province	2006-2007洛阳孟津县送庄乡朱寨村优质小麦OPT试验	OPT-K	6873	225	120	0
929	Henan province	2006-2007洛阳孟津县送庄乡朱寨村优质小麦OPT试验	OPT-K	6993	225	120	0
930	Henan province	2006-2007洛阳孟津县送庄乡朱寨村优质小麦OPT试验	FP	6798	180	75	75
931	Henan province	2006-2007洛阳孟津县送庄乡朱寨村优质小麦OPT试验	FP	6732	180	75	75
932	Henan province	2006-2007洛阳孟津县送庄乡朱寨村优质小麦OPT试验	FP	6890	180	75	75
933	Henan province	2006-2007洛阳孟津县送庄乡朱寨村优质小麦OPT试验	FP-N	5436	0	75	75
934	Henan province	2006-2007洛阳孟津县送庄乡朱寨村优质小麦OPT试验	FP-N	5526	0	75	75
935	Henan province	2006-2007洛阳孟津县送庄乡朱寨村优质小麦OPT试验	FP-N	5384	0	75	75
936	Henan province	2006-2007洛阳孟津县送庄乡朱寨村优质小麦OPT试验	FP-P	5793	180	0	75
937	Henan province	2006-2007洛阳孟津县送庄乡朱寨村优质小麦OPT试验	FP-P	5705	180	0	75
938	Henan province	2006-2007洛阳孟津县送庄乡朱寨村优质小麦OPT试验	FP-P	5780	180	0	75
939	Henan province	2006-2007洛阳孟津县送庄乡朱寨村优质小麦OPT试验	FP-K	6153	180	75	0
940	Henan province	2006-2007洛阳孟津县送庄乡朱寨村优质小麦OPT试验	FP-K	6096	180	75	0
941	Henan province	2006-2007洛阳孟津县送庄乡朱寨村优质小麦OPT试验	FP-K	6143	180	75	0
942	Henan province	2006-2007洛阳孟津县送庄乡朱寨村优质小麦OPT试验	CK	5255	0	0	0
943	Henan province	2006-2007洛阳孟津县送庄乡朱寨村优质小麦OPT试验	CK	5384	0	0	0
944	Henan province	2006-2007洛阳孟津县送庄乡朱寨村优质小麦OPT试验	CK	5408	0	0	0
945	Henan province	2006-2007新乡市延津县司寨乡平陵村优质小麦OPT试验	OPT	8708	225	120	180
946	Henan province	2006-2007新乡市延津县司寨乡平陵村优质小麦OPT试验	OPT	8702	225	120	180
947	Henan province	2006-2007新乡市延津县司寨乡平陵村优质小麦OPT试验	OPT	8837	225	120	180
948	Henan province	2006-2007新乡市延津县司寨乡平陵村优质小麦OPT试验	OPT-N	5883	0	120	180
949	Henan province	2006-2007新乡市延津县司寨乡平陵村优质小麦OPT试验	OPT-N	5934	0	120	180
950	Henan province	2006-2007新乡市延津县司寨乡平陵村优质小麦OPT试验	OPT-N	6003	0	120	180
951	Henan province	2006-2007新乡市延津县司寨乡平陵村优质小麦OPT试验	OPT-P	6230	225	0	180
952	Henan province	2006-2007新乡市延津县司寨乡平陵村优质小麦OPT试验	OPT-P	6305	225	0	180
953	Henan province	2006-2007新乡市延津县司寨乡平陵村优质小麦OPT试验	OPT-P	6366	225	0	180
954	Henan province	2006-2007新乡市延津县司寨乡平陵村优质小麦OPT试验	OPT-K	6680	225	120	0
955	Henan province	2006-2007新乡市延津县司寨乡平陵村优质小麦OPT试验	OPT-K	6771	225	120	0
956	Henan province	2006-2007新乡市延津县司寨乡平陵村优质小麦OPT试验	OPT-K	6887	225	120	0
957	Henan province	2006-2007新乡市延津县司寨乡平陵村优质小麦OPT试验	CK	5384	0	0	0
958	Henan province	2006-2007新乡市延津县司寨乡平陵村优质小麦OPT试验	CK	5471	0	0	0
959	Henan province	2006-2007新乡市延津县司寨乡平陵村优质小麦OPT试验	CK	5508	0	0	0
960	Henan province	2007-2008新乡延津县司寨乡平陵村小麦养分吸收规律研究	1.CK	4692	0	0	0
961	Henan province	2007-2008新乡延津县司寨乡平陵村小麦养分吸收规律研究	1.CK	5004	0	0	0
962	Henan province	2007-2008新乡延津县司寨乡平陵村小麦养分吸收规律研究	1.CK	5166	0	0	0
963	Henan province	2007-2008新乡延津县司寨乡平陵村小麦养分吸收规律研究	2.N225P105K105	8028	225	105	105
964	Henan province	2007-2008新乡延津县司寨乡平陵村小麦养分吸收规律研究	2.N225P105K105	8184	225	105	105
965	Henan province	2007-2008新乡延津县司寨乡平陵村小麦养分吸收规律研究	2.N225P105K105	8274	225	105	105
966	Henan province	2007-2008新乡延津县司寨乡平陵村小麦氮肥用量试验	1.CK	4809	0	0	0
967	Henan province	2007-2008新乡延津县司寨乡平陵村小麦氮肥用量试验	1.CK	4952	0	0	0
968	Henan province	2007-2008新乡延津县司寨乡平陵村小麦氮肥用量试验	1.CK	5015	0	0	0
969	Henan province	2007-2008新乡延津县司寨乡平陵村小麦氮肥用量试验	2.N135P75K60Mn0	6684	135	75	60
970	Henan province	2007-2008新乡延津县司寨乡平陵村小麦氮肥用量试验	2.N135P75K60Mn0	6905	135	75	60
971	Henan province	2007-2008新乡延津县司寨乡平陵村小麦氮肥用量试验	2.N135P75K60Mn0	7031	135	75	60
972	Henan province	2007-2008新乡延津县司寨乡平陵村小麦氮肥用量试验	3.N180P75K60Mn0	7068	180	75	60
973	Henan province	2007-2008新乡延津县司寨乡平陵村小麦氮肥用量试验	3.N180P75K60Mn0	7239	180	75	60
974	Henan province	2007-2008新乡延津县司寨乡平陵村小麦氮肥用量试验	3.N180P75K60Mn0	7293	180	75	60
975	Henan province	2007-2008新乡延津县司寨乡平陵村小麦氮肥用量试验	4.N125P75K60Mn0	7427	220	75	60
976	Henan province	2007-2008新乡延津县司寨乡平陵村小麦氮肥用量试验	4.N125P75K60Mn0	7548	220	75	60
977	Henan province	2007-2008新乡延津县司寨乡平陵村小麦氮肥用量试验	4.N125P75K60Mn0	7676	220	75	60
978	Henan province	2007-2008新乡延津县司寨乡平陵村小麦氮肥用量试验	5.N270P75K60Mn0	7205	270	75	60
979	Henan province	2007-2008新乡延津县司寨乡平陵村小麦氮肥用量试验	5.N270P75K60Mn0	7353	270	75	60
980	Henan province	2007-2008新乡延津县司寨乡平陵村小麦氮肥用量试验	5.N270P75K60Mn0	7478	270	75	60
981	Henan province	2007-2008新乡延津县司寨乡平陵村小麦氮肥用量试验	6.N225P75K60Mn30	7587	225	75	60
982	Henan province	2007-2008新乡延津县司寨乡平陵村小麦氮肥用量试验	6.N225P75K60Mn30	7686	225	75	60
983	Henan province	2007-2008新乡延津县司寨乡平陵村小麦氮肥用量试验	6.N225P75K60Mn30	7767	225	75	60
984	Henan province	2007-2008驻马店驿城区水屯镇新坡村冬小麦OPT定位试验	1 OPT	7893	225	105	105
985	Henan province	2007-2008驻马店驿城区水屯镇新坡村冬小麦OPT定位试验	1 OPT	8127	225	105	105
986	Henan province	2007-2008驻马店驿城区水屯镇新坡村冬小麦OPT定位试验	1 OPT	8280	225	105	105
987	Henan province	2007-2008驻马店驿城区水屯镇新坡村冬小麦OPT定位试验	2 OPT-N	5563.5	0	105	105
988	Henan province	2007-2008驻马店驿城区水屯镇新坡村冬小麦OPT定位试验	2 OPT-N	5851.5	0	105	105
989	Henan province	2007-2008驻马店驿城区水屯镇新坡村冬小麦OPT定位试验	2 OPT-N	5955	0	105	105
990	Henan province	2007-2008驻马店驿城区水屯镇新坡村冬小麦OPT定位试验	3 OPT-P	5952	225	0	105
991	Henan province	2007-2008驻马店驿城区水屯镇新坡村冬小麦OPT定位试验	3 OPT-P	6078	225	0	105
992	Henan province	2007-2008驻马店驿城区水屯镇新坡村冬小麦OPT定位试验	3 OPT-P	6195	225	0	105
993	Henan province	2007-2008驻马店驿城区水屯镇新坡村冬小麦OPT定位试验	4 OPT-K	6841.5	225	105	0
994	Henan province	2007-2008驻马店驿城区水屯镇新坡村冬小麦OPT定位试验	4 OPT-K	7062	225	105	0
995	Henan province	2007-2008驻马店驿城区水屯镇新坡村冬小麦OPT定位试验	4 OPT-K	7246.5	225	105	0
996	Henan province	2007-2008驻马店驿城区水屯镇新坡村冬小麦OPT定位试验	5 FP	7132.5	195	75	75
997	Henan province	2007-2008驻马店驿城区水屯镇新坡村冬小麦OPT定位试验	5 FP	7246.5	195	75	75
998	Henan province	2007-2008驻马店驿城区水屯镇新坡村冬小麦OPT定位试验	5 FP	7311	195	75	75
999	Henan province	2007-2008驻马店驿城区水屯镇新坡村冬小麦OPT定位试验	6 CK	4827	0	0	0
1000	Henan province	2007-2008驻马店驿城区水屯镇新坡村冬小麦OPT定位试验	6 CK	5154	0	0	0
1001	Henan province	2007-2008驻马店驿城区水屯镇新坡村冬小麦OPT定位试验	6 CK	5319	0	0	0
1002	Henan province	2007-2008新乡延津县司寨乡平陵村冬小麦OPT定位试验	1 OPT	7931	210	105	105
1003	Henan province	2007-2008新乡延津县司寨乡平陵村冬小麦OPT定位试验	1 OPT	8124	210	105	105
1004	Henan province	2007-2008新乡延津县司寨乡平陵村冬小麦OPT定位试验	1 OPT	8276	210	105	105
1005	Henan province	2007-2008新乡延津县司寨乡平陵村冬小麦OPT定位试验	2 OPT-N	5037	0	105	105
1006	Henan province	2007-2008新乡延津县司寨乡平陵村冬小麦OPT定位试验	2 OPT-N	5259	0	105	105
1007	Henan province	2007-2008新乡延津县司寨乡平陵村冬小麦OPT定位试验	2 OPT-N	5427	0	105	105
1008	Henan province	2007-2008新乡延津县司寨乡平陵村冬小麦OPT定位试验	3 OPT-P	6491	210	0	105
1009	Henan province	2007-2008新乡延津县司寨乡平陵村冬小麦OPT定位试验	3 OPT-P	6609	210	0	105
1010	Henan province	2007-2008新乡延津县司寨乡平陵村冬小麦OPT定位试验	3 OPT-P	6740	210	0	105
1011	Henan province	2007-2008新乡延津县司寨乡平陵村冬小麦OPT定位试验	4 OPT-K	6723	210	105	0
1012	Henan province	2007-2008新乡延津县司寨乡平陵村冬小麦OPT定位试验	4 OPT-K	6807	210	105	0
1013	Henan province	2007-2008新乡延津县司寨乡平陵村冬小麦OPT定位试验	4 OPT-K	6879	210	105	0
1014	Henan province	2007-2008新乡延津县司寨乡平陵村冬小麦OPT定位试验	5 FP	7136	195	75	75
1015	Henan province	2007-2008新乡延津县司寨乡平陵村冬小麦OPT定位试验	5 FP	7235	195	75	75
1016	Henan province	2007-2008新乡延津县司寨乡平陵村冬小麦OPT定位试验	5 FP	7293	195	75	75
1017	Henan province	2007-2008新乡延津县司寨乡平陵村冬小麦OPT定位试验	6 CK	4329	0	0	0
1018	Henan province	2007-2008新乡延津县司寨乡平陵村冬小麦OPT定位试验	6 CK	4581	0	0	0
1019	Henan province	2007-2008新乡延津县司寨乡平陵村冬小麦OPT定位试验	6 CK	4752	0	0	0
1020	Henan province	2007-2008驻马店农科所小麦轮作体系养分需求与供应同步机制研究	1. N225P180K0	6302	225	180	0
1021	Henan province	2007-2008驻马店农科所小麦轮作体系养分需求与供应同步机制研究	1. N225P180K0	6087	225	180	0
1022	Henan province	2007-2008驻马店农科所小麦轮作体系养分需求与供应同步机制研究	1. N225P180K0	5972	225	180	0
1023	Henan province	2007-2008驻马店农科所小麦轮作体系养分需求与供应同步机制研究	2.N225P180K84	6609	225	180	84
1024	Henan province	2007-2008驻马店农科所小麦轮作体系养分需求与供应同步机制研究	2.N225P180K84	6452	225	180	84
1025	Henan province	2007-2008驻马店农科所小麦轮作体系养分需求与供应同步机制研究	2.N225P180K84	6200	225	180	84
1026	Henan province	2007-2008驻马店农科所小麦轮作体系养分需求与供应同步机制研究	3.N225P180K105	6903	225	180	105
1027	Henan province	2007-2008驻马店农科所小麦轮作体系养分需求与供应同步机制研究	3.N225P180K105	6729	225	180	105
1028	Henan province	2007-2008驻马店农科所小麦轮作体系养分需求与供应同步机制研究	3.N225P180K105	6618	225	180	105
1029	Henan province	2007-2008驻马店农科所小麦轮作体系养分需求与供应同步机制研究	4.N225P120K0	7046	225	120	0
1030	Henan province	2007-2008驻马店农科所小麦轮作体系养分需求与供应同步机制研究	4.N225P120K0	6837	225	120	0
1031	Henan province	2007-2008驻马店农科所小麦轮作体系养分需求与供应同步机制研究	4.N225P120K0	6638	225	120	0
1032	Henan province	2007-2008驻马店农科所小麦轮作体系养分需求与供应同步机制研究	5 .N225P120K84	7383	225	120	84
1033	Henan province	2007-2008驻马店农科所小麦轮作体系养分需求与供应同步机制研究	5 .N225P120K84	7232	225	120	84
1034	Henan province	2007-2008驻马店农科所小麦轮作体系养分需求与供应同步机制研究	5 .N225P120K84	6986	225	120	84
1035	Henan province	2007-2008驻马店农科所小麦轮作体系养分需求与供应同步机制研究	6.N225P120K105	7760	225	120	105
1036	Henan province	2007-2008驻马店农科所小麦轮作体系养分需求与供应同步机制研究	6.N225P120K105	7583	225	120	105
1037	Henan province	2007-2008驻马店农科所小麦轮作体系养分需求与供应同步机制研究	6.N225P120K105	7383	225	120	105
1038	Henan province	2007-2008驻马店农科所小麦轮作体系养分需求与供应同步机制研究	7.N225P90K0	5532	225	90	0
1039	Henan province	2007-2008驻马店农科所小麦轮作体系养分需求与供应同步机制研究	7.N225P90K0	5331	225	90	0
1040	Henan province	2007-2008驻马店农科所小麦轮作体系养分需求与供应同步机制研究	7.N225P90K0	4977	225	90	0
1041	Henan province	2007-2008驻马店农科所小麦轮作体系养分需求与供应同步机制研究	8.N225P90K84	5847	225	90	84
1042	Henan province	2007-2008驻马店农科所小麦轮作体系养分需求与供应同步机制研究	8.N225P90K84	5649	225	90	84
1043	Henan province	2007-2008驻马店农科所小麦轮作体系养分需求与供应同步机制研究	8.N225P90K84	5379	225	90	84
1044	Henan province	2007-2008驻马店农科所小麦轮作体系养分需求与供应同步机制研究	9.N225P90K105	6158	225	90	105
1045	Henan province	2007-2008驻马店农科所小麦轮作体系养分需求与供应同步机制研究	9.N225P90K105	5982	225	90	105
1046	Henan province	2007-2008驻马店农科所小麦轮作体系养分需求与供应同步机制研究	9.N225P90K105	5861	225	90	105
1047	Henan province	2007-2008驻马店农科所小麦轮作体系养分需求与供应同步机制研究	10.CK	5166	0	0	0
1048	Henan province	2007-2008驻马店农科所小麦轮作体系养分需求与供应同步机制研究	10.CK	5004	0	0	0
1049	Henan province	2007-2008驻马店农科所小麦轮作体系养分需求与供应同步机制研究	10.CK	4680	0	0	0
1110	Henan province	2007-2008新乡延津县司寨乡平陵村氮肥不同基追比对小麦养分需求与供应的影响	1.不施氮肥	5244	0	105	105
1111	Henan province	2007-2008新乡延津县司寨乡平陵村氮肥不同基追比对小麦养分需求与供应的影响	1.不施氮肥	5412	0	105	105
1112	Henan province	2007-2008新乡延津县司寨乡平陵村氮肥不同基追比对小麦养分需求与供应的影响	1.不施氮肥	5532	0	105	105
1113	Henan province	2007-2008新乡延津县司寨乡平陵村氮肥不同基追比对小麦养分需求与供应的影响	2.100%氮肥基肥	6063	225	105	105
1114	Henan province	2007-2008新乡延津县司寨乡平陵村氮肥不同基追比对小麦养分需求与供应的影响	2.100%氮肥基肥	6227	225	105	105
1115	Henan province	2007-2008新乡延津县司寨乡平陵村氮肥不同基追比对小麦养分需求与供应的影响	2.100%氮肥基肥	6359	225	105	105
1116	Henan province	2007-2008新乡延津县司寨乡平陵村氮肥不同基追比对小麦养分需求与供应的影响	3.氮肥基肥50% + 返青50%	6611	225	105	105
1117	Henan province	2007-2008新乡延津县司寨乡平陵村氮肥不同基追比对小麦养分需求与供应的影响	3.氮肥基肥50% + 返青50%	6753	225	105	105
1118	Henan province	2007-2008新乡延津县司寨乡平陵村氮肥不同基追比对小麦养分需求与供应的影响	3.氮肥基肥50% + 返青50%	6974	225	105	105
1119	Henan province	2007-2008新乡延津县司寨乡平陵村氮肥不同基追比对小麦养分需求与供应的影响	4.氮肥基肥33.3% + 返青33.3%+拔节期33.3%	7800	225	105	105
1120	Henan province	2007-2008新乡延津县司寨乡平陵村氮肥不同基追比对小麦养分需求与供应的影响	4.氮肥基肥33.3% + 返青33.3%+拔节期33.3%	7992	225	105	105
1121	Henan province	2007-2008新乡延津县司寨乡平陵村氮肥不同基追比对小麦养分需求与供应的影响	4.氮肥基肥33.3% + 返青33.3%+拔节期33.3%	8142	225	105	105
1122	Henan province	2007-2008新乡延津县司寨乡平陵村氮肥不同基追比对小麦养分需求与供应的影响	5.氮肥基肥25% + 返青25% +拔节期25% +抽穗期 25%	7349	225	105	105
1123	Henan province	2007-2008新乡延津县司寨乡平陵村氮肥不同基追比对小麦养分需求与供应的影响	5.氮肥基肥25% + 返青25% +拔节期25% +抽穗期 25%	7434	225	105	105
1124	Henan province	2007-2008新乡延津县司寨乡平陵村氮肥不同基追比对小麦养分需求与供应的影响	5.氮肥基肥25% + 返青25% +拔节期25% +抽穗期 25%	7552	225	105	105
1125	Henan province	2007-2008新乡延津县司寨乡平陵村钾肥不同基追比对小麦养分需求与供应的影响	1.不施钾肥	6042	225	105	0
1126	Henan province	2007-2008新乡延津县司寨乡平陵村钾肥不同基追比对小麦养分需求与供应的影响	1.不施钾肥	6248	225	105	0
1127	Henan province	2007-2008新乡延津县司寨乡平陵村钾肥不同基追比对小麦养分需求与供应的影响	1.不施钾肥	6437	225	105	0
1128	Henan province	2007-2008新乡延津县司寨乡平陵村钾肥不同基追比对小麦养分需求与供应的影响	2. 钾肥100%基肥	7473	225	105	105
1129	Henan province	2007-2008新乡延津县司寨乡平陵村钾肥不同基追比对小麦养分需求与供应的影响	2. 钾肥100%基肥	7577	225	105	105
1130	Henan province	2007-2008新乡延津县司寨乡平陵村钾肥不同基追比对小麦养分需求与供应的影响	2. 钾肥100%基肥	7673	225	105	105
1131	Henan province	2007-2008新乡延津县司寨乡平陵村钾肥不同基追比对小麦养分需求与供应的影响	3.50%基肥+钾肥50%拔节	7749	225	105	105
1132	Henan province	2007-2008新乡延津县司寨乡平陵村钾肥不同基追比对小麦养分需求与供应的影响	3.50%基肥+钾肥50%拔节	7812	225	105	105
1133	Henan province	2007-2008新乡延津县司寨乡平陵村钾肥不同基追比对小麦养分需求与供应的影响	3.50%基肥+钾肥50%拔节	7893	225	105	105
1134	Henan province	2007-2008新乡延津县司寨乡平陵村钾肥不同基追比对小麦养分需求与供应的影响	4. 钾肥70%基肥+钾肥30%拔节	7991	225	105	105
1135	Henan province	2007-2008新乡延津县司寨乡平陵村钾肥不同基追比对小麦养分需求与供应的影响	4. 钾肥70%基肥+钾肥30%拔节	8105	225	105	105
1136	Henan province	2007-2008新乡延津县司寨乡平陵村钾肥不同基追比对小麦养分需求与供应的影响	4. 钾肥70%基肥+钾肥30%拔节	8193	225	105	105
1137	Henan province	2006-2007驻马店市遂平县和兴乡和兴村优质小麦OPT试验	OPT	7953	225	120	180
1138	Henan province	2006-2007驻马店市遂平县和兴乡和兴村优质小麦OPT试验	OPT	8028	225	120	180
1139	Henan province	2006-2007驻马店市遂平县和兴乡和兴村优质小麦OPT试验	OPT	8106	225	120	180
1140	Henan province	2006-2007驻马店市遂平县和兴乡和兴村优质小麦OPT试验	OPT-N	5684	0	120	180
1141	Henan province	2006-2007驻马店市遂平县和兴乡和兴村优质小麦OPT试验	OPT-N	5762	0	120	180
1142	Henan province	2006-2007驻马店市遂平县和兴乡和兴村优质小麦OPT试验	OPT-N	5841	0	120	180
1143	Henan province	2006-2007驻马店市遂平县和兴乡和兴村优质小麦OPT试验	OPT-P	6080	225	0	180
1144	Henan province	2006-2007驻马店市遂平县和兴乡和兴村优质小麦OPT试验	OPT-P	6155	225	0	180
1145	Henan province	2006-2007驻马店市遂平县和兴乡和兴村优质小麦OPT试验	OPT-P	6201	225	0	180
1146	Henan province	2006-2007驻马店市遂平县和兴乡和兴村优质小麦OPT试验	OPT-K	6318	225	120	0
1147	Henan province	2006-2007驻马店市遂平县和兴乡和兴村优质小麦OPT试验	OPT-K	6399	225	120	0
1148	Henan province	2006-2007驻马店市遂平县和兴乡和兴村优质小麦OPT试验	OPT-K	6488	225	120	0
1149	Henan province	2006-2007驻马店市遂平县和兴乡和兴村优质小麦OPT试验	FP	6867	180	75	75
1150	Henan province	2006-2007驻马店市遂平县和兴乡和兴村优质小麦OPT试验	FP	6972	180	75	75
1151	Henan province	2006-2007驻马店市遂平县和兴乡和兴村优质小麦OPT试验	FP	7049	180	75	75
1152	Henan province	2006-2007驻马店市遂平县和兴乡和兴村优质小麦OPT试验	FP-N	5465	0	75	75
1153	Henan province	2006-2007驻马店市遂平县和兴乡和兴村优质小麦OPT试验	FP-N	5538	0	75	75
1154	Henan province	2006-2007驻马店市遂平县和兴乡和兴村优质小麦OPT试验	FP-N	5391	0	75	75
1155	Henan province	2006-2007驻马店市遂平县和兴乡和兴村优质小麦OPT试验	FP-P	5646	180	0	75
1156	Henan province	2006-2007驻马店市遂平县和兴乡和兴村优质小麦OPT试验	FP-P	5555	180	0	75
1157	Henan province	2006-2007驻马店市遂平县和兴乡和兴村优质小麦OPT试验	FP-P	5703	180	0	75
1158	Henan province	2006-2007驻马店市遂平县和兴乡和兴村优质小麦OPT试验	FP-K	5987	180	75	0
1159	Henan province	2006-2007驻马店市遂平县和兴乡和兴村优质小麦OPT试验	FP-K	6068	180	75	0
1160	Henan province	2006-2007驻马店市遂平县和兴乡和兴村优质小麦OPT试验	FP-K	5912	180	75	0
1161	Henan province	2006-2007驻马店市遂平县和兴乡和兴村优质小麦OPT试验	CK	4868	0	0	0
1162	Henan province	2006-2007驻马店市遂平县和兴乡和兴村优质小麦OPT试验	CK	5013	0	0	0
1163	Henan province	2006-2007驻马店市遂平县和兴乡和兴村优质小麦OPT试验	CK	5093	0	0	0
1164	Henan province	2006-2007驻马店市驿城区水屯镇新坡村优质小麦OPT试验	OPT	7655	225	120	180
1165	Henan province	2006-2007驻马店市驿城区水屯镇新坡村优质小麦OPT试验	OPT	7553	225	120	180
1166	Henan province	2006-2007驻马店市驿城区水屯镇新坡村优质小麦OPT试验	OPT	7641	225	120	180
1167	Henan province	2006-2007驻马店市驿城区水屯镇新坡村优质小麦OPT试验	OPT-N	5525	0	120	180
1168	Henan province	2006-2007驻马店市驿城区水屯镇新坡村优质小麦OPT试验	OPT-N	5571	0	120	180
1169	Henan province	2006-2007驻马店市驿城区水屯镇新坡村优质小麦OPT试验	OPT-N	5699	0	120	180
1170	Henan province	2006-2007驻马店市驿城区水屯镇新坡村优质小麦OPT试验	OPT-P	6003	225	0	180
1171	Henan province	2006-2007驻马店市驿城区水屯镇新坡村优质小麦OPT试验	OPT-P	5919	225	0	180
1172	Henan province	2006-2007驻马店市驿城区水屯镇新坡村优质小麦OPT试验	OPT-P	5871	225	0	180
1173	Henan province	2006-2007驻马店市驿城区水屯镇新坡村优质小麦OPT试验	OPT-K	6153	225	120	0
1174	Henan province	2006-2007驻马店市驿城区水屯镇新坡村优质小麦OPT试验	OPT-K	6048	225	120	0
1175	Henan province	2006-2007驻马店市驿城区水屯镇新坡村优质小麦OPT试验	OPT-K	6230	225	120	0
1176	Henan province	2006-2007驻马店市驿城区水屯镇新坡村优质小麦OPT试验	FP	6453	180	75	75
1177	Henan province	2006-2007驻马店市驿城区水屯镇新坡村优质小麦OPT试验	FP	6396	180	75	75
1178	Henan province	2006-2007驻马店市驿城区水屯镇新坡村优质小麦OPT试验	FP	6563	180	75	75
1179	Henan province	2006-2007驻马店市驿城区水屯镇新坡村优质小麦OPT试验	FP-N	5298	0	75	75
1180	Henan province	2006-2007驻马店市驿城区水屯镇新坡村优质小麦OPT试验	FP-N	5402	0	75	75
1181	Henan province	2006-2007驻马店市驿城区水屯镇新坡村优质小麦OPT试验	FP-N	5270	0	75	75
1182	Henan province	2006-2007驻马店市驿城区水屯镇新坡村优质小麦OPT试验	FP-P	5703	180	0	75
1183	Henan province	2006-2007驻马店市驿城区水屯镇新坡村优质小麦OPT试验	FP-P	5762	180	0	75
1184	Henan province	2006-2007驻马店市驿城区水屯镇新坡村优质小麦OPT试验	FP-P	5826	180	0	75
1185	Henan province	2006-2007驻马店市驿城区水屯镇新坡村优质小麦OPT试验	FP-K	5853	180	75	0
1186	Henan province	2006-2007驻马店市驿城区水屯镇新坡村优质小麦OPT试验	FP-K	5840	180	75	0
1187	Henan province	2006-2007驻马店市驿城区水屯镇新坡村优质小麦OPT试验	FP-K	5927	180	75	0
1188	Henan province	2006-2007驻马店市驿城区水屯镇新坡村优质小麦OPT试验	CK	4655	0	0	0
1189	Henan province	2006-2007驻马店市驿城区水屯镇新坡村优质小麦OPT试验	CK	4578	0	0	0
1190	Henan province	2006-2007驻马店市驿城区水屯镇新坡村优质小麦OPT试验	CK	4686	0	0	0
1191	Henan province	2009-2010新乡小麦OPT试验	OPT	7945	225	90	120
1192	Henan province	2009-2010新乡小麦OPT试验	OPT	7631	225	90	120
1193	Henan province	2009-2010新乡小麦OPT试验	OPT	8024	225	90	120
1194	Henan province	2009-2010新乡小麦OPT试验	OPT-N	5188	0	90	120
1195	Henan province	2009-2010新乡小麦OPT试验	OPT-N	4982	0	90	120
1196	Henan province	2009-2010新乡小麦OPT试验	OPT-N	5239	0	90	120
1197	Henan province	2009-2010新乡小麦OPT试验	OPT-P	6546	225	0	120
1198	Henan province	2009-2010新乡小麦OPT试验	OPT-P	6286	225	0	120
1199	Henan province	2009-2010新乡小麦OPT试验	OPT-P	6610	225	0	120
1200	Henan province	2009-2010新乡小麦OPT试验	OPT-K	6734	225	90	0
1201	Henan province	2009-2010新乡小麦OPT试验	OPT-K	6467	225	90	0
1202	Henan province	2009-2010新乡小麦OPT试验	OPT-K	6800	225	90	0
1203	Henan province	2009-2010新乡小麦OPT试验	FP	7147	195	75	75
1204	Henan province	2009-2010新乡小麦OPT试验	FP	6864	195	75	75
1205	Henan province	2009-2010新乡小麦OPT试验	FP	7218	195	75	75
1206	Henan province	2009-2010新乡小麦OPT试验	CK	4508	0	0	0
1207	Henan province	2009-2010新乡小麦OPT试验	CK	4329	0	0	0
1208	Henan province	2009-2010新乡小麦OPT试验	CK	4552	0	0	0
1209	Henan province	2009-2010洛阳孟津小麦OPT试验	OPT	7707	225	120	180
1210	Henan province	2009-2010洛阳孟津小麦OPT试验	OPT	7401	225	120	180
1211	Henan province	2009-2010洛阳孟津小麦OPT试验	OPT	7783	225	120	180
1212	Henan province	2009-2010洛阳孟津小麦OPT试验	OPT-N	5349	0	120	180
1213	Henan province	2009-2010洛阳孟津小麦OPT试验	OPT-N	5138	0	120	180
1214	Henan province	2009-2010洛阳孟津小麦OPT试验	OPT-N	5402	0	120	180
1215	Henan province	2009-2010洛阳孟津小麦OPT试验	OPT-P	5672	225	0	180
1216	Henan province	2009-2010洛阳孟津小麦OPT试验	OPT-P	5448	225	0	180
1217	Henan province	2009-2010洛阳孟津小麦OPT试验	OPT-P	5728	225	0	180
1218	Henan province	2009-2010洛阳孟津小麦OPT试验	OPT-K	6566	225	120	0
1219	Henan province	2009-2010洛阳孟津小麦OPT试验	OPT-K	6306	225	120	0
1220	Henan province	2009-2010洛阳孟津小麦OPT试验	OPT-K	6631	225	120	0
1221	Henan province	2009-2010洛阳孟津小麦OPT试验	FP	6188	180	75	75
1222	Henan province	2009-2010洛阳孟津小麦OPT试验	FP	5943	180	75	75
1223	Henan province	2009-2010洛阳孟津小麦OPT试验	FP	6249	180	75	75
1224	Henan province	2009-2010洛阳孟津小麦OPT试验	CK	4862	0	0	0
1225	Henan province	2009-2010洛阳孟津小麦OPT试验	CK	4670	0	0	0
1226	Henan province	2009-2010洛阳孟津小麦OPT试验	CK	4910	0	0	0
1227	Henan province	2009-2010驻马店市水屯小麦OPT试验	OPT	7960	225	60	90
1228	Henan province	2009-2010驻马店市水屯小麦OPT试验	OPT	7645	225	60	90
1229	Henan province	2009-2010驻马店市水屯小麦OPT试验	OPT	8039	225	60	90
1230	Henan province	2009-2010驻马店市水屯小麦OPT试验	OPT-N	4381	0	60	90
1231	Henan province	2009-2010驻马店市水屯小麦OPT试验	OPT-N	4208	0	60	90
1232	Henan province	2009-2010驻马店市水屯小麦OPT试验	OPT-N	4425	0	60	90
1233	Henan province	2009-2010驻马店市水屯小麦OPT试验	OPT-P	7114	225	0	90
1234	Henan province	2009-2010驻马店市水屯小麦OPT试验	OPT-P	6832	225	0	90
1235	Henan province	2009-2010驻马店市水屯小麦OPT试验	OPT-P	7185	225	0	90
1236	Henan province	2009-2010驻马店市水屯小麦OPT试验	OPT-K	6854	225	60	0
1237	Henan province	2009-2010驻马店市水屯小麦OPT试验	OPT-K	6583	225	60	0
1238	Henan province	2009-2010驻马店市水屯小麦OPT试验	OPT-K	6922	225	60	0
1239	Henan province	2009-2010驻马店市水屯小麦OPT试验	FP	6680	195	60	0
1240	Henan province	2009-2010驻马店市水屯小麦OPT试验	FP	6416	195	60	0
1241	Henan province	2009-2010驻马店市水屯小麦OPT试验	FP	6747	195	60	0
1242	Henan province	2009-2010驻马店市水屯小麦OPT试验	CK	3731	0	0	0
1243	Henan province	2009-2010驻马店市水屯小麦OPT试验	CK	3583	0	0	0
1244	Henan province	2009-2010驻马店市水屯小麦OPT试验	CK	3768	0	0	0
1245	Henan province	2009-2010驻马店水屯小麦氮肥用量试验	CK	3432	0	0	0
1246	Henan province	2009-2010驻马店水屯小麦氮肥用量试验	CK	3724	0	0	0
1247	Henan province	2009-2010驻马店水屯小麦氮肥用量试验	CK	3797	0	0	0
1248	Henan province	2009-2010驻马店水屯小麦氮肥用量试验	N0P75K100	4166	0	75	100
1249	Henan province	2009-2010驻马店水屯小麦氮肥用量试验	N0P75K100	4381	0	75	100
1250	Henan province	2009-2010驻马店水屯小麦氮肥用量试验	N0P75K100	4338	0	75	100
1251	Henan province	2009-2010驻马店水屯小麦氮肥用量试验	N75P75K100	5570	75	75	100
1252	Henan province	2009-2010驻马店水屯小麦氮肥用量试验	N75P75K100	5980	75	75	100
1253	Henan province	2009-2010驻马店水屯小麦氮肥用量试验	N75P75K100	6039	75	75	100
1254	Henan province	2009-2010驻马店水屯小麦氮肥用量试验	N150P75K100	7324	150	75	100
1255	Henan province	2009-2010驻马店水屯小麦氮肥用量试验	N150P75K100	7623	150	75	100
1256	Henan province	2009-2010驻马店水屯小麦氮肥用量试验	N150P75K100	7473	150	75	100
1257	Henan province	2009-2010驻马店水屯小麦氮肥用量试验	N225P75K100	7504	225	75	100
1258	Henan province	2009-2010驻马店水屯小麦氮肥用量试验	N225P75K100	7895	225	75	100
1259	Henan province	2009-2010驻马店水屯小麦氮肥用量试验	N225P75K100	8051	225	75	100
1260	Henan province	2009-2010驻马店水屯小麦氮肥用量试验	N300P75K100	7240	300	75	100
1261	Henan province	2009-2010驻马店水屯小麦氮肥用量试验	N300P75K100	7535	300	75	100
1262	Henan province	2009-2010驻马店水屯小麦氮肥用量试验	N300P75K100	7387	300	75	100
1263	Henan province	2009-2010新乡平陵小麦氮素基施的条件试验	N0	4642	0	90	120
1264	Henan province	2009-2010新乡平陵小麦氮素基施的条件试验	N0	4458	0	90	120
1265	Henan province	2009-2010新乡平陵小麦氮素基施的条件试验	N0	4550	0	90	120
1266	Henan province	2009-2010新乡平陵小麦氮素基施的条件试验	N0	4734	0	90	120
1267	Henan province	2009-2010新乡平陵小麦氮素基施的条件试验	N80二次	5946	80	90	120
1268	Henan province	2009-2010新乡平陵小麦氮素基施的条件试验	N80二次	5711	80	90	120
1269	Henan province	2009-2010新乡平陵小麦氮素基施的条件试验	N80二次	5829	80	90	120
1270	Henan province	2009-2010新乡平陵小麦氮素基施的条件试验	N80二次	6064	80	90	120
1271	Henan province	2009-2010新乡平陵小麦氮素基施的条件试验	N120三次	7031	120	90	120
1272	Henan province	2009-2010新乡平陵小麦氮素基施的条件试验	N120三次	6752	120	90	120
1273	Henan province	2009-2010新乡平陵小麦氮素基施的条件试验	N120三次	6892	120	90	120
1274	Henan province	2009-2010新乡平陵小麦氮素基施的条件试验	N120三次	7170	120	90	120
1275	Henan province	2009-2010新乡平陵小麦氮素基施的条件试验	N120二次	6403	120	90	120
1276	Henan province	2009-2010新乡平陵小麦氮素基施的条件试验	N120二次	6149	120	90	120
1277	Henan province	2009-2010新乡平陵小麦氮素基施的条件试验	N120二次	6276	120	90	120
1278	Henan province	2009-2010新乡平陵小麦氮素基施的条件试验	N120二次	6529	120	90	120
1279	Henan province	2009-2010新乡平陵小麦氮素基施的条件试验	N180三次	7585	180	90	120
1280	Henan province	2009-2010新乡平陵小麦氮素基施的条件试验	N180三次	7284	180	90	120
1281	Henan province	2009-2010新乡平陵小麦氮素基施的条件试验	N180三次	7434	180	90	120
1282	Henan province	2009-2010新乡平陵小麦氮素基施的条件试验	N180三次	7735	180	90	120
1283	Henan province	2009-2010新乡平陵小麦氮素基施的条件试验	N180二次	6947	160	90	120
1284	Henan province	2009-2010新乡平陵小麦氮素基施的条件试验	N180二次	6671	160	90	120
1285	Henan province	2009-2010新乡平陵小麦氮素基施的条件试验	N180二次	6809	160	90	120
1286	Henan province	2009-2010新乡平陵小麦氮素基施的条件试验	N180二次	7084	160	90	120
1287	Henan province	2009-2010新乡平陵小麦氮素基施的条件试验	N240三次	8285	240	90	120
1288	Henan province	2009-2010新乡平陵小麦氮素基施的条件试验	N240三次	7957	240	90	120
1289	Henan province	2009-2010新乡平陵小麦氮素基施的条件试验	N240三次	8121	240	90	120
1290	Henan province	2009-2010新乡平陵小麦氮素基施的条件试验	N240三次	8449	240	90	120
1291	Henan province	2009-2010新乡平陵小麦氮素基施的条件试验	FP200	7716	200	90	120
1292	Henan province	2009-2010新乡平陵小麦氮素基施的条件试验	FP200	7410	200	90	120
1293	Henan province	2009-2010新乡平陵小麦氮素基施的条件试验	FP200	7563	200	90	120
1294	Henan province	2009-2010新乡平陵小麦氮素基施的条件试验	FP200	7869	200	90	120
1295	Henan province	2009-2010新乡平陵小麦氮素基施的条件试验	控释尿素240	7961	240	90	120
1296	Henan province	2009-2010新乡平陵小麦氮素基施的条件试验	控释尿素240	7646	240	90	120
1297	Henan province	2009-2010新乡平陵小麦氮素基施的条件试验	控释尿素240	7804	240	90	120
1298	Henan province	2009-2010新乡平陵小麦氮素基施的条件试验	控释尿素240	8119	240	90	120
1299	Henan province	2009-2010新乡平陵小麦氮素基施的条件试验	控释BB肥240	8121	240	90	51
1300	Henan province	2009-2010新乡平陵小麦氮素基施的条件试验	控释BB肥240	7799	240	90	51
1301	Henan province	2009-2010新乡平陵小麦氮素基施的条件试验	控释BB肥240	7960	240	90	51
1302	Henan province	2009-2010新乡平陵小麦氮素基施的条件试验	控释BB肥240	8282	240	90	51
	Henan province
	Henan province		OPT	7655
	Henan province	高产冬小麦需肥规律研究	CK0	5800
	Henan province	河南省浚县巨桥镇姜庄	OPT	7465
	Henan province		CK0	5165
	Henan province		OPT	6980
	Henan province		CK0	6007.5
	Henan province		OPT	8635.1	210	90	60
	Henan province		OPT-N	8170.5	0	90	60
	Henan province		OPT-P	7989.5	210	0	60
	Henan province		OPT-K	8509.7	210	90	0
	Henan province		FP	8575	270	90	0
	Henan province		FP-N	8595	0	90	0
	Henan province		FP-P	8560	270	0	0
	Henan province		FHN	8675	360	210	135
	Henan province		CK0	7830.2	0	0	0
	Henan province		OPT	8715.2	210	90	60
	Henan province		OPT-N	7715.4	0	90	60
	Henan province		OPT-P	8510.5	210	0	60
	Henan province		OPT-K	7980.3	210	90	0
	Henan province		FP	8925	270	90	0
	Henan province		FP-N	8055	0	90	0
	Henan province		FP-P	8735	270	0	0
	Henan province		FHN	9070	360	210	135
	Henan province		CK0	7550	0	0	0
	Henan province		OPT	8929.7	210	90	60
	Henan province		OPT-N	8074.1	0	90	60
	Henan province		OPT-P	8330	210	0	60
	Henan province		OPT-K	8145	210	90	0
	Henan province		FP	8565	270	90	0
	Henan province		FP-N	8925	0	90	0
	Henan province		FP-P	8230	270	0	0
	Henan province		FHN	8965	360	210	135
	Henan province		CK0	8279.8	0	0	0
159	Hebei province	2002年辛集钾肥定位试验（冬小麦）	M	6665	225	90	0
163	Hebei province	2002年辛集钾肥定位试验（冬小麦）	MK	6845	225	90	150
167	Hebei province	2002年辛集钾肥定位试验（冬小麦）	K	6845	225	90	150
171	Hebei province	2002年辛集钾肥定位试验（冬小麦）	CK	6195	225	90	0
199	Hebei province	2003年辛集钾肥定位试验（冬小麦）	M	6585	225	90	0
203	Hebei province	2003年辛集钾肥定位试验（冬小麦）	MK	6465	225	90	150
207	Hebei province	2003年辛集钾肥定位试验（冬小麦）	K	6495	225	90	150
211	Hebei province	2003年辛集钾肥定位试验（冬小麦）	CK	6205	225	90	0
278	Hebei province	2004年辛集钾肥定位试验（冬小麦）	M	6000	225	90	0
282	Hebei province	2004年辛集钾肥定位试验（冬小麦）	MK	6525	225	90	150
286	Hebei province	2004年辛集钾肥定位试验（冬小麦）	K	6390	225	90	150
290	Hebei province	2004年辛集钾肥定位试验（冬小麦）	CK	5850	225	90	0
472	Hebei province	2007年河北辛集冬小麦养分限制因子研究试验	OPT	5500	180	100	75
473	Hebei province	2007年河北辛集冬小麦养分限制因子研究试验	OPT	5550	180	100	75
474	Hebei province	2007年河北辛集冬小麦养分限制因子研究试验	OPT	7900	180	100	75
475	Hebei province	2007年河北辛集冬小麦养分限制因子研究试验	OPT-N	3425	0	100	75
476	Hebei province	2007年河北辛集冬小麦养分限制因子研究试验	OPT-N	4800	0	100	75
477	Hebei province	2007年河北辛集冬小麦养分限制因子研究试验	OPT-N	6075	0	100	75
478	Hebei province	2007年河北辛集冬小麦养分限制因子研究试验	OPT-P	5975	180	0	75
479	Hebei province	2007年河北辛集冬小麦养分限制因子研究试验	OPT-P	5125	180	0	75
480	Hebei province	2007年河北辛集冬小麦养分限制因子研究试验	OPT-P	6150	180	0	75
481	Hebei province	2007年河北辛集冬小麦养分限制因子研究试验	OPT-K	5975	180	100	0
482	Hebei province	2007年河北辛集冬小麦养分限制因子研究试验	OPT-K	5700	180	100	0
483	Hebei province	2007年河北辛集冬小麦养分限制因子研究试验	OPT-K	6825	180	100	0
484	Hebei province	2007年河北辛集冬小麦养分限制因子研究试验	FP	5650	300	150	0
485	Hebei province	2007年河北辛集冬小麦养分限制因子研究试验	FP	4875	300	150	0
486	Hebei province	2007年河北辛集冬小麦养分限制因子研究试验	FP	6350	300	150	0
487	Hebei province	2007年河北辛集冬小麦养分限制因子研究试验	CK0	3400	0	0	0
488	Hebei province	2007年河北辛集冬小麦养分限制因子研究试验	CK0	3325	0	0	0
489	Hebei province	2007年河北辛集冬小麦养分限制因子研究试验	CK0	4925	0	0	0
495	Hebei province	2009年河北辛集冬小麦氮肥不同用量研究总结	N0P60K90	6315	0	60	90
501	Hebei province	2009年河北辛集冬小麦氮肥不同用量研究总结	N0P60K90	6715	0	60	90
502	Hebei province	2009年河北辛集冬小麦氮肥不同用量研究总结	N0P60K90	6643	0	60	90
508	Hebei province	2009年河北辛集冬小麦氮肥不同用量研究总结	N60P60K90	6970	60	60	90
514	Hebei province	2009年河北辛集冬小麦氮肥不同用量研究总结	N60P60K90	6165	60	60	90
521	Hebei province	2009年河北辛集冬小麦氮肥不同用量研究总结	N60P60K90	7145	60	60	90
527	Hebei province	2009年河北辛集冬小麦氮肥不同用量研究总结	N120P60K90	7523	120	60	90
534	Hebei province	2009年河北辛集冬小麦氮肥不同用量研究总结	N120P60K90	7253	120	60	90
540	Hebei province	2009年河北辛集冬小麦氮肥不同用量研究总结	N120P60K90	6738	120	60	90
547	Hebei province	2009年河北辛集冬小麦氮肥不同用量研究总结	N180P60K90	7730	180	60	90
553	Hebei province	2009年河北辛集冬小麦氮肥不同用量研究总结	N180P60K90	7483	180	60	90
560	Hebei province	2009年河北辛集冬小麦氮肥不同用量研究总结	N180P60K90	7903	180	60	90
566	Hebei province	2009年河北辛集冬小麦氮肥不同用量研究总结	N240P60K90	7608	240	60	90
573	Hebei province	2009年河北辛集冬小麦氮肥不同用量研究总结	N240P60K90	7310	240	60	90
579	Hebei province	2009年河北辛集冬小麦氮肥不同用量研究总结	N240P60K90	8373	240	60	90
585	Hebei province	2009年河北辛集冬小麦氮肥不同用量研究总结	N300P60K90	7948	300	60	90
591	Hebei province	2009年河北辛集冬小麦氮肥不同用量研究总结	N300P60K90	7838	300	60	90
597	Hebei province	2009年河北辛集冬小麦氮肥不同用量研究总结	N300P60K90	7438	300	60	90
598	Hebei province	2009年河北辛集冬小麦氮肥基追肥用量试验总结	N0	6255	0	60	90
604	Hebei province	2009年河北辛集冬小麦氮肥基追肥用量试验总结	N0	6400	0	60	90
610	Hebei province	2009年河北辛集冬小麦氮肥基追肥用量试验总结	N0	6545	0	60	90
617	Hebei province	2009年河北辛集冬小麦氮肥基追肥用量试验总结	N120（0-80-40）	7060	120	60	90
624	Hebei province	2009年河北辛集冬小麦氮肥基追肥用量试验总结	N120（0-80-40）	6505	120	60	90
630	Hebei province	2009年河北辛集冬小麦氮肥基追肥用量试验总结	N120（0-80-40）	6970	120	60	90
636	Hebei province	2009年河北辛集冬小麦氮肥基追肥用量试验总结	N120（20-60-40）	6673	120	60	90
642	Hebei province	2009年河北辛集冬小麦氮肥基追肥用量试验总结	N120（20-60-40）	7735	120	60	90
648	Hebei province	2009年河北辛集冬小麦氮肥基追肥用量试验总结	N120（20-60-40）	7055	120	60	90
655	Hebei province	2009年河北辛集冬小麦氮肥基追肥用量试验总结	N120（40-40-40）	6715	120	60	90
661	Hebei province	2009年河北辛集冬小麦氮肥基追肥用量试验总结	N120（40-40-40）	7905	120	60	90
667	Hebei province	2009年河北辛集冬小麦氮肥基追肥用量试验总结	N120（40-40-40）	7055	120	60	90
673	Hebei province	2009年河北辛集冬小麦氮肥基追肥用量试验总结	N180（0-120-60）	7018	180	60	90
679	Hebei province	2009年河北辛集冬小麦氮肥基追肥用量试验总结	N180（0-120-60）	7480	180	60	90
686	Hebei province	2009年河北辛集冬小麦氮肥基追肥用量试验总结	N180（0-120-60）	6588	180	60	90
693	Hebei province	2009年河北辛集冬小麦氮肥基追肥用量试验总结	N180（30-90-60）	7650	180	60	90
694	Hebei province	2009年河北辛集冬小麦氮肥基追肥用量试验总结	N180（30-90-60）	7988	180	60	90
700	Hebei province	2009年河北辛集冬小麦氮肥基追肥用量试验总结	N180（30-90-60）	7395	180	60	90
706	Hebei province	2009年河北辛集冬小麦氮肥基追肥用量试验总结	N180（60-60-60）	7013	180	60	90
713	Hebei province	2009年河北辛集冬小麦氮肥基追肥用量试验总结	N180（60-60-60）	8050	180	60	90
720	Hebei province	2009年河北辛集冬小麦氮肥基追肥用量试验总结	N180（60-60-60）	8180	180	60	90
724	Hebei province	2009年河北辛集冬小麦OPT试验总结	OPT	8203	180	60	90
725	Hebei province	2009年河北辛集冬小麦OPT试验总结	OPT	7523	180	60	90
726	Hebei province	2009年河北辛集冬小麦OPT试验总结	OPT	8585	180	60	90
727	Hebei province	2009年河北辛集冬小麦OPT试验总结	OPT-N	4828	0	60	90
728	Hebei province	2009年河北辛集冬小麦OPT试验总结	OPT-N	5758	0	60	90
729	Hebei province	2009年河北辛集冬小麦OPT试验总结	OPT-N	5512	0	60	90
730	Hebei province	2009年河北辛集冬小麦OPT试验总结	OPT-P	7070	180	0	90
731	Hebei province	2009年河北辛集冬小麦OPT试验总结	OPT-P	7565	180	0	90
732	Hebei province	2009年河北辛集冬小麦OPT试验总结	OPT-P	7476	180	0	90
733	Hebei province	2009年河北辛集冬小麦OPT试验总结	OPT-K	7300	180	60	0
734	Hebei province	2009年河北辛集冬小麦OPT试验总结	OPT-K	7778	180	60	0
735	Hebei province	2009年河北辛集冬小麦OPT试验总结	OPT-K	7566	180	60	0
736	Hebei province	2009年河北辛集冬小麦OPT试验总结	CK0	4978	0	0	0
737	Hebei province	2009年河北辛集冬小麦OPT试验总结	CK0	5798	0	0	0
738	Hebei province	2009年河北辛集冬小麦OPT试验总结	CK0	4888	0	0	0
739	Hebei province	2009年河北辛集冬小麦OPT试验总结	FP	7055	300	190	0
740	Hebei province	2009年河北辛集冬小麦OPT试验总结	FP	8925	300	190	0
741	Hebei province	2009年河北辛集冬小麦OPT试验总结	FP	8543	300	190	0
742	Hebei province	2009年河北衡水冬小麦OPT试验总结	OPT	7326	225	120	90
743	Hebei province	2009年河北衡水冬小麦OPT试验总结	OPT	8496	225	120	90
744	Hebei province	2009年河北衡水冬小麦OPT试验总结	OPT	8346	225	120	90
745	Hebei province	2009年河北衡水冬小麦OPT试验总结	OPT-N	6786	0	120	90
746	Hebei province	2009年河北衡水冬小麦OPT试验总结	OPT-N	6222	0	120	90
747	Hebei province	2009年河北衡水冬小麦OPT试验总结	OPT-N	6282	0	120	90
748	Hebei province	2009年河北衡水冬小麦OPT试验总结	OPT-P	7290	225	0	90
749	Hebei province	2009年河北衡水冬小麦OPT试验总结	OPT-P	7506	225	0	90
750	Hebei province	2009年河北衡水冬小麦OPT试验总结	OPT-P	7812	225	0	90
751	Hebei province	2009年河北衡水冬小麦OPT试验总结	OPT-K	7500	225	120	0
752	Hebei province	2009年河北衡水冬小麦OPT试验总结	OPT-K	7824	225	120	0
753	Hebei province	2009年河北衡水冬小麦OPT试验总结	OPT-K	7680	225	120	0
754	Hebei province	2009年河北衡水冬小麦OPT试验总结	CK0	6114	0	0	0
755	Hebei province	2009年河北衡水冬小麦OPT试验总结	CK0	6132	0	0	0
756	Hebei province	2009年河北衡水冬小麦OPT试验总结	CK0	6726	0	0	0
757	Hebei province	2009年河北衡水冬小麦OPT试验总结	FP	7452	276	168	0
758	Hebei province	2009年河北衡水冬小麦OPT试验总结	FP	9162	276	168	0
759	Hebei province	2009年河北衡水冬小麦OPT试验总结	FP	8082	276	168	0
760	Hebei province	2009年河北辛集钾肥定位试验（冬小麦）	NP	7211	225	90	0
761	Hebei province	2009年河北辛集钾肥定位试验（冬小麦）	NP	7041	225	90	0
762	Hebei province	2009年河北辛集钾肥定位试验（冬小麦）	NP	7221	225	90	0
763	Hebei province	2009年河北辛集钾肥定位试验（冬小麦）	NP	6570	225	90	0
764	Hebei province	2009年河北辛集钾肥定位试验（冬小麦）	NPK	7961	225	90	150
765	Hebei province	2009年河北辛集钾肥定位试验（冬小麦）	NPK	7541	225	90	150
766	Hebei province	2009年河北辛集钾肥定位试验（冬小麦）	NPK	7470	225	90	150
767	Hebei province	2009年河北辛集钾肥定位试验（冬小麦）	NPK	7590	225	90	150
768	Hebei province	2009年河北辛集钾肥定位试验（冬小麦）	NPSt	7551	225	90	0
769	Hebei province	2009年河北辛集钾肥定位试验（冬小麦）	NPSt	7811	225	90	0
770	Hebei province	2009年河北辛集钾肥定位试验（冬小麦）	NPSt	6771	225	90	0
771	Hebei province	2009年河北辛集钾肥定位试验（冬小麦）	NPSt	7211	225	90	0
772	Hebei province	2009年河北辛集钾肥定位试验（冬小麦）	NPKSt	7911	225	90	150
773	Hebei province	2009年河北辛集钾肥定位试验（冬小麦）	NPKSt	7380	225	90	150
774	Hebei province	2009年河北辛集钾肥定位试验（冬小麦）	NPKSt	7991	225	90	150
775	Hebei province	2009年河北辛集钾肥定位试验（冬小麦）	NPKSt	7920	225	90	150
776	Hebei province	2008年河北辛集钾肥定位试验（冬小麦）	NP	5575	225	90	0
777	Hebei province	2008年河北辛集钾肥定位试验（冬小麦）	NP	5145	225	90	0
778	Hebei province	2008年河北辛集钾肥定位试验（冬小麦）	NP	5670	225	90	0
779	Hebei province	2008年河北辛集钾肥定位试验（冬小麦）	NP	5640	225	90	0
780	Hebei province	2008年河北辛集钾肥定位试验（冬小麦）	NPK	6085	225	90	150
781	Hebei province	2008年河北辛集钾肥定位试验（冬小麦）	NPK	5775	225	90	150
782	Hebei province	2008年河北辛集钾肥定位试验（冬小麦）	NPK	5640	225	90	150
783	Hebei province	2008年河北辛集钾肥定位试验（冬小麦）	NPK	5945	225	90	150
784	Hebei province	2008年河北辛集钾肥定位试验（冬小麦）	NPSt	5925	225	90	0
785	Hebei province	2008年河北辛集钾肥定位试验（冬小麦）	NPSt	6210	225	90	0
786	Hebei province	2008年河北辛集钾肥定位试验（冬小麦）	NPSt	5340	225	90	0
787	Hebei province	2008年河北辛集钾肥定位试验（冬小麦）	NPSt	5475	225	90	0
788	Hebei province	2008年河北辛集钾肥定位试验（冬小麦）	NPKSt	6390	225	90	150
789	Hebei province	2008年河北辛集钾肥定位试验（冬小麦）	NPKSt	5790	225	90	150
790	Hebei province	2008年河北辛集钾肥定位试验（冬小麦）	NPKSt	5850	225	90	150
791	Hebei province	2008年河北辛集钾肥定位试验（冬小麦）	NPKSt	6270	225	90	150
792	Hebei province	2008年河北辛集冬小麦养分吸收规律试验总结	CK0	7294	0	0	0
793	Hebei province	2008年河北辛集冬小麦养分吸收规律试验总结	CK0	6746	0	0	0
794	Hebei province	2008年河北辛集冬小麦养分吸收规律试验总结	CK0	6915	0	0	0
795	Hebei province	2008年河北辛集冬小麦养分吸收规律试验总结	OPT	3983	180	75	120
796	Hebei province	2008年河北辛集冬小麦养分吸收规律试验总结	OPT	4202	180	75	120
797	Hebei province	2008年河北辛集冬小麦养分吸收规律试验总结	OPT	4507	180	75	120
798	Hebei province	2008年河北辛集冬小麦OPT定位试验总结	OPT	7221	180	75	120
799	Hebei province	2008年河北辛集冬小麦OPT定位试验总结	OPT	6867	180	75	120
800	Hebei province	2008年河北辛集冬小麦OPT定位试验总结	OPT	6634	180	75	120
801	Hebei province	2008年河北辛集冬小麦OPT定位试验总结	OPT-N	6264	0	75	120
802	Hebei province	2008年河北辛集冬小麦OPT定位试验总结	OPT-N	6692	0	75	120
803	Hebei province	2008年河北辛集冬小麦OPT定位试验总结	OPT-N	5836	0	75	120
804	Hebei province	2008年河北辛集冬小麦OPT定位试验总结	OPT-P	7233	180	0	120
805	Hebei province	2008年河北辛集冬小麦OPT定位试验总结	OPT-P	6856	180	0	120
806	Hebei province	2008年河北辛集冬小麦OPT定位试验总结	OPT-P	6554	180	0	120
807	Hebei province	2008年河北辛集冬小麦OPT定位试验总结	OPT-K	6994	180	75	0
808	Hebei province	2008年河北辛集冬小麦OPT定位试验总结	OPT-K	7138	180	75	0
809	Hebei province	2008年河北辛集冬小麦OPT定位试验总结	OPT-K	6519	180	75	0
810	Hebei province	2008年河北辛集冬小麦OPT定位试验总结	FP	6814	320	180	60
811	Hebei province	2008年河北辛集冬小麦OPT定位试验总结	FP	6465	320	180	60
812	Hebei province	2008年河北辛集冬小麦OPT定位试验总结	FP	7488	320	180	60
813	Hebei province	2008年河北辛集冬小麦OPT定位试验总结	CK0	5460	0	0	0
814	Hebei province	2008年河北辛集冬小麦OPT定位试验总结	CK0	5021	0	0	0
815	Hebei province	2008年河北辛集冬小麦OPT定位试验总结	CK0	5801	0	0	0
816	Hebei province	2008年河北正定冬小麦钾肥不同基追比试验总结	不施钾肥K0	6564	180	75	0
817	Hebei province	2008年河北正定冬小麦钾肥不同基追比试验总结	不施钾肥K0	6535	180	75	0
818	Hebei province	2008年河北正定冬小麦钾肥不同基追比试验总结	不施钾肥K0	7384	180	75	0
819	Hebei province	2008年河北正定冬小麦钾肥不同基追比试验总结	K1：100%基肥	6923	180	75	120
820	Hebei province	2008年河北正定冬小麦钾肥不同基追比试验总结	K1：100%基肥	7475	180	75	120
821	Hebei province	2008年河北正定冬小麦钾肥不同基追比试验总结	K1：100%基肥	7862	180	75	120
822	Hebei province	2008年河北正定冬小麦钾肥不同基追比试验总结	K1：50%基肥-50%拔节	6979	180	75	120
823	Hebei province	2008年河北正定冬小麦钾肥不同基追比试验总结	K1：50%基肥-50%拔节	6923	180	75	120
824	Hebei province	2008年河北正定冬小麦钾肥不同基追比试验总结	K1：50%基肥-50%拔节	7219	180	75	120
825	Hebei province	2008年河北正定冬小麦钾肥不同基追比试验总结	K1：70%基肥-30%拔节	7190	180	75	120
826	Hebei province	2008年河北正定冬小麦钾肥不同基追比试验总结	K1：70%基肥-30%拔节	7278	180	75	120
827	Hebei province	2008年河北正定冬小麦钾肥不同基追比试验总结	K1：70%基肥-30%拔节	7470	180	75	120
834	Hebei province	2007年河北正定冬小麦钾肥适宜用量研究试验总结	OPT	8141	180	40	120
835	Hebei province	2007年河北正定冬小麦钾肥适宜用量研究试验总结	OPT	8930	180	40	120
836	Hebei province	2007年河北正定冬小麦钾肥适宜用量研究试验总结	OPT	7649	180	40	120
837	Hebei province	2007年河北正定冬小麦钾肥适宜用量研究试验总结	OPT-1/2K	7116	180	40	60
838	Hebei province	2007年河北正定冬小麦钾肥适宜用量研究试验总结	OPT-1/2K	8657	180	40	60
839	Hebei province	2007年河北正定冬小麦钾肥适宜用量研究试验总结	OPT-1/2K	7844	180	40	60
840	Hebei province	2007年河北正定冬小麦钾肥适宜用量研究试验总结	OPT-K	7689	180	40	0
841	Hebei province	2007年河北正定冬小麦钾肥适宜用量研究试验总结	OPT-K	7526	180	40	0
842	Hebei province	2007年河北正定冬小麦钾肥适宜用量研究试验总结	OPT-K	7308	180	40	0
843	Hebei province	2007年河北正定冬小麦钾肥适宜用量研究试验总结	OPT+1/2K	9261	180	40	180
844	Hebei province	2007年河北正定冬小麦钾肥适宜用量研究试验总结	OPT+1/2K	8886	180	40	180
845	Hebei province	2007年河北正定冬小麦钾肥适宜用量研究试验总结	OPT+1/2K	8300	180	40	180
846	Hebei province	2007年河北正定冬小麦钾肥适宜用量研究试验总结	OPT+K	10073	180	40	240
847	Hebei province	2007年河北正定冬小麦钾肥适宜用量研究试验总结	OPT+K	8400	180	40	240
848	Hebei province	2007年河北正定冬小麦钾肥适宜用量研究试验总结	OPT+K	8418	180	40	240
849	Hebei province	2007年河北正定冬小麦钾肥适宜用量研究试验总结	FP	7110	250	72	68
850	Hebei province	2007年河北正定冬小麦钾肥适宜用量研究试验总结	FP	7664	250	72	68
851	Hebei province	2007年河北正定冬小麦钾肥适宜用量研究试验总结	FP	7047	250	72	68
951	Hebei province	2007年河北辛集钾肥定位试验（冬小麦）	NP	5756	225	90	0
952	Hebei province	2007年河北辛集钾肥定位试验（冬小麦）	NP	5670	225	90	0
953	Hebei province	2007年河北辛集钾肥定位试验（冬小麦）	NP	4590	225	90	0
954	Hebei province	2007年河北辛集钾肥定位试验（冬小麦）	NP	5475	225	90	0
955	Hebei province	2007年河北辛集钾肥定位试验（冬小麦）	NPK	5970	225	90	150
956	Hebei province	2007年河北辛集钾肥定位试验（冬小麦）	NPK	5625	225	90	150
957	Hebei province	2007年河北辛集钾肥定位试验（冬小麦）	NPK	4680	225	90	150
958	Hebei province	2007年河北辛集钾肥定位试验（冬小麦）	NPK	6300	225	90	150
959	Hebei province	2007年河北辛集钾肥定位试验（冬小麦）	NPSt	5734	225	90	0
960	Hebei province	2007年河北辛集钾肥定位试验（冬小麦）	NPSt	5795	225	90	0
961	Hebei province	2007年河北辛集钾肥定位试验（冬小麦）	NPSt	4595	225	90	0
962	Hebei province	2007年河北辛集钾肥定位试验（冬小麦）	NPSt	5500	225	90	0
963	Hebei province	2007年河北辛集钾肥定位试验（冬小麦）	NPKSt	6326	225	90	150
964	Hebei province	2007年河北辛集钾肥定位试验（冬小麦）	NPKSt	6450	225	90	150
965	Hebei province	2007年河北辛集钾肥定位试验（冬小麦）	NPKSt	5730	225	90	150
966	Hebei province	2007年河北辛集钾肥定位试验（冬小麦）	NPKSt	6075	225	90	150
1004	Hebei province	2009-2010控释尿素在小麦生产中的应用效果研究（保定）	BU100	6944.88	270	75	90
1005	Hebei province	控释尿素在小麦生产中的应用效果研究（保定）	BU100	7372.38	270	75	90
1006	Hebei province	控释尿素在小麦生产中的应用效果研究（保定）	BU100	7087.38	270	75	90
1007	Hebei province	控释尿素在小麦生产中的应用效果研究（保定）	BU40+BU60	7586.7	270	75	90
1008	Hebei province	控释尿素在小麦生产中的应用效果研究（保定）	BU40+BU60	7977.72	270	75	90
1009	Hebei province	控释尿素在小麦生产中的应用效果研究（保定）	BU40+BU60	7407.72	270	75	90
1010	Hebei province	控释尿素在小麦生产中的应用效果研究（保定）	BU40CRU60	7444.2	270	75	90
1011	Hebei province	控释尿素在小麦生产中的应用效果研究（保定）	BU40CRU60	7052.04	270	75	90
1012	Hebei province	控释尿素在小麦生产中的应用效果研究（保定）	BU40CRU60	7479.54	270	75	90
1013	Hebei province	控释尿素在小麦生产中的应用效果研究（保定）	CRU100	7514.88	270	75	90
1014	Hebei province	控释尿素在小麦生产中的应用效果研究（保定）	CRU100	6944.88	270	75	90
1015	Hebei province	控释尿素在小麦生产中的应用效果研究（保定）	CRU100	6731.7	270	75	90
1016	Hebei province	控释尿素在小麦生产中的应用效果研究（保定）	CRU75	6731.7	202.5	75	90
1017	Hebei province	控释尿素在小麦生产中的应用效果研究（保定）	CRU75	6374.88	202.5	75	90
1018	Hebei province	控释尿素在小麦生产中的应用效果研究（保定）	CRU75	5983.86	202.5	75	90
1019	Hebei province	控释尿素在小麦生产中的应用效果研究（保定）	BU75	6339.54	202.5	75	90
1020	Hebei province	控释尿素在小麦生产中的应用效果研究（保定）	BU75	6482.04	202.5	75	90
1021	Hebei province	控释尿素在小麦生产中的应用效果研究（保定）	BU75	5876.7	202.5	75	90
1022	Hebei province	控释尿素在小麦生产中的应用效果研究（保定）	CRU50	6232.38	135	75	90
1023	Hebei province	控释尿素在小麦生产中的应用效果研究（保定）	CRU50	6089.88	135	75	90
1024	Hebei province	控释尿素在小麦生产中的应用效果研究（保定）	CRU50	5556.36	135	75	90
1025	Hebei province	控释尿素在小麦生产中的应用效果研究（保定）	BU50	6126.36	135	75	90
1026	Hebei province	控释尿素在小麦生产中的应用效果研究（保定）	BU50	5698.86	135	75	90
1027	Hebei province	控释尿素在小麦生产中的应用效果研究（保定）	BU50	5662.38	135	75	90
1028	Hebei province	控释尿素在小麦生产中的应用效果研究（保定）	CK	5487.96	0	75	90
1029	Hebei province	控释尿素在小麦生产中的应用效果研究（保定）	CK	5628.18	0	75	90
1030	Hebei province	控释尿素在小麦生产中的应用效果研究（保定）	CK	5876.7	0	75	90
1031	Hebei province	控释尿素在小麦生产中的应用效果研究（沧州）	BU100	7494.47	210	75	90
1032	Hebei province	控释尿素在小麦生产中的应用效果研究（沧州）	BU100	6583.96	210	75	90
1033	Hebei province	控释尿素在小麦生产中的应用效果研究（沧州）	BU100	6899.05	210	75	90
1034	Hebei province	控释尿素在小麦生产中的应用效果研究（沧州）	BU40+BU60	7039.16	210	75	90
1035	Hebei province	控释尿素在小麦生产中的应用效果研究（沧州）	BU40+BU60	8124.78	210	75	90
1036	Hebei province	控释尿素在小麦生产中的应用效果研究（沧州）	BU40+BU60	6688.95	210	75	90
1037	Hebei province	控释尿素在小麦生产中的应用效果研究（沧州）	BU40CRU60	6618.95	210	75	90
1038	Hebei province	控释尿素在小麦生产中的应用效果研究（沧州）	BU40CRU60	6829.06	210	75	90
1039	Hebei province	控释尿素在小麦生产中的应用效果研究（沧州）	BU40CRU60	7634.58	210	75	90
1040	Hebei province	控释尿素在小麦生产中的应用效果研究（沧州）	CRU100	6653.95	210	75	90
1041	Hebei province	控释尿素在小麦生产中的应用效果研究（沧州）	CRU100	7004.16	210	75	90
1042	Hebei province	控释尿素在小麦生产中的应用效果研究（沧州）	CRU100	7564.47	210	75	90
1043	Hebei province	控释尿素在小麦生产中的应用效果研究（沧州）	CRU75	7284.37	157.5	75	90
1044	Hebei province	控释尿素在小麦生产中的应用效果研究（沧州）	CRU75	6969.16	157.5	75	90
1045	Hebei province	控释尿素在小麦生产中的应用效果研究（沧州）	CRU75	6864.05	157.5	75	90
1046	Hebei province	控释尿素在小麦生产中的应用效果研究（沧州）	BU75	6934.16	157.5	75	90
1047	Hebei province	控释尿素在小麦生产中的应用效果研究（沧州）	BU75	6408.85	157.5	75	90
1048	Hebei province	控释尿素在小麦生产中的应用效果研究（沧州）	BU75	7284.37	157.5	75	90
1049	Hebei province	控释尿素在小麦生产中的应用效果研究（沧州）	CRU50	6408.85	105	75	90
1050	Hebei province	控释尿素在小麦生产中的应用效果研究（沧州）	CRU50	6723.95	105	75	90
1051	Hebei province	控释尿素在小麦生产中的应用效果研究（沧州）	CRU50	7004.16	105	75	90
1052	Hebei province	控释尿素在小麦生产中的应用效果研究（沧州）	BU50	5673.32	105	75	90
1053	Hebei province	控释尿素在小麦生产中的应用效果研究（沧州）	BU50	6443.85	105	75	90
1054	Hebei province	控释尿素在小麦生产中的应用效果研究（沧州）	BU50	6864.05	105	75	90
1055	Hebei province	控释尿素在小麦生产中的应用效果研究（沧州）	CK	5603.33	0	75	90
1056	Hebei province	控释尿素在小麦生产中的应用效果研究（沧州）	CK	5848.43	0	75	90
1057	Hebei province	控释尿素在小麦生产中的应用效果研究（沧州）	CK	5904.06	0	75	90
	Hebei province	正定OPT试验	OPT	7431	225	60	90
	Hebei province		OPT	7684	225	60	90
	Hebei province		OPT	6794	225	60	90
	Hebei province		OPT-N	6303	0	60	90
	Hebei province		OPT-N	5507	0	60	90
	Hebei province		OPT-N	6529	0	60	90
	Hebei province		OPT-P	7099	225	0	90
	Hebei province		OPT-P	7535	225	0	90
	Hebei province		OPT-P	7147	225	0	90
	Hebei province		OPT-K	6716	225	60	0
	Hebei province		OPT-K	6963	225	60	0
	Hebei province		OPT-K	7272	225	60	0
	Hebei province		FP	7007	178	150	48
	Hebei province		FP	7431	178	150	48
	Hebei province		FP	6582	178	150	48
	Hebei province		CK0	6626	0	0	0
	Hebei province		CK0	6409	0	0	0
	Hebei province		CK0	5719	0	0	0
	Hebei province		EI-0 N all yr	5115.47
	Hebei province		EI-0 N all yr	5775.42
	Hebei province		EI-0 N all yr	6186.52
	Hebei province		EI-0 N all yr	4990.57
	Hebei province		EI-N 2/3yr	4899.4
	Hebei province		EI-N 2/3yr	5658.46
	Hebei province		EI-N 2/3yr	6072.49
	Hebei province		EI-N 2/3yr	4623.37
	Hebei province		EI-N all yr	5670.45
	Hebei province		EI-N all yr	6624.54
	Hebei province		EI-N all yr	6624.54
	Hebei province		EI-N all yr	6819.56
	Hebei province		FP-0 N all yr	5865.47
	Hebei province		FP-0 N all yr	6036.52
	Hebei province		FP-0 N all yr	5865.47
	Hebei province		FP-0 N all yr	4824.95
	Hebei province		FP-N 2/3yr	5865.47
	Hebei province		FP-N 2/3yr	6117.52
	Hebei province		FP-N 2/3yr	4826.77
	Hebei province		FP-N 2/3yr	5589.45
	Hebei province		FP-N all yr	5934.48
	Hebei province		FP-N all yr	7059.62
	Hebei province		FP-N all yr	6831.55
	Hebei province		FP-N all yr	6396.47
	Hebei province		OPT	7294	180	75	120
	Hebei province		CK0	3983	0	0	0
	Hebei province		OPT	6746	180	75	120
	Hebei province		CK0	4202	0	0	0
	Hebei province		OPT	6915	180	75	120
	Hebei province		CK0	4507	0	0	0
967	Hebei province	2006年河北辛集钾肥定位试验（冬小麦）	NP	5704	225	90	0
	Hebei province		NPK	6056	225	90	150
	Hebei province		NPSt	5981	225	90	0
	Hebei province		NPKSt	6210	225	90	150
882	Hebei province	2006年河北辛集冬小麦OPT试验总结	OPT	6933	255	150	150
	Hebei province		OPT-1/3N	6708	150	150	150
	Hebei province		OPT-1/2K	6208	255	150	75
	Hebei province		OPT-K	6408	255	150	0
	Hebei province		OPT-1/3P	6442	255	100	150
	Hebei province		OPT-P	4900	255	0	150
	Hebei province		OPT-1/3N-1/2K	5867	150	150	75
286	Hebei province	2009年河北省衡水市冬小麦氮肥用量试验	N0P90K90	6388.9	0	90	90
293	Hebei province	2009年河北省衡水市冬小麦氮肥用量试验	N0P90K90	6396.8	0	90	90
294	Hebei province	2009年河北省衡水市冬小麦氮肥用量试验	N0P90K90	6539.7	0	90	90
300	Hebei province	2009年河北省衡水市冬小麦氮肥用量试验	N60P90K90)	6714.3	60	90	90
306	Hebei province	2009年河北省衡水市冬小麦氮肥用量试验	N60P90K90)	6873	60	90	90
312	Hebei province	2009年河北省衡水市冬小麦氮肥用量试验	N60P90K90)	6650.8	60	90	90
318	Hebei province	2009年河北省衡水市冬小麦氮肥用量试验	N120P90K90	6103.2	120	90	90
325	Hebei province	2009年河北省衡水市冬小麦氮肥用量试验	N120P90K90	6087.3	120	90	90
331	Hebei province	2009年河北省衡水市冬小麦氮肥用量试验	N120P90K90	4817.5	120	90	90
337	Hebei province	2009年河北省衡水市冬小麦氮肥用量试验	N180P90K90	6627	180	90	90
343	Hebei province	2009年河北省衡水市冬小麦氮肥用量试验	N180P90K90	6801.6	180	90	90
350	Hebei province	2009年河北省衡水市冬小麦氮肥用量试验	N180P90K90	5722.2	180	90	90
356	Hebei province	2009年河北省衡水市冬小麦氮肥用量试验	N240P90K90	7214.3	240	90	90
362	Hebei province	2009年河北省衡水市冬小麦氮肥用量试验	N240P90K90	6912.7	240	90	90
368	Hebei province	2009年河北省衡水市冬小麦氮肥用量试验	N240P90K90	6103.2	240	90	90
374	Hebei province	2009年河北省衡水市冬小麦氮肥用量试验	N300P90K90	6357.1	300	90	90
381	Hebei province	2009年河北省衡水市冬小麦氮肥用量试验	N300P90K90	6627	300	90	90
387	Hebei province	2009年河北省衡水市冬小麦氮肥用量试验	N300P90K90	6706.3	300	90	90
632	Hebei province	2009年河北省衡水市冬小麦氮肥运筹试验	N0	6683.5	0	90	90
637	Hebei province	2009年河北省衡水市冬小麦氮肥运筹试验	N0	6039.7	0	90	90
643	Hebei province	2009年河北省衡水市冬小麦氮肥运筹试验	N0	6577.4	0	90	90
840	Hebei province	2009年河北省辛集市马庄冬小麦氮肥不同基追比试验	N0	5468.3	0	90	90
845	Hebei province	2009年河北省辛集市马庄冬小麦氮肥不同基追比试验	N0	6115.1	0	90	90
851	Hebei province	2009年河北省辛集市马庄冬小麦氮肥不同基追比试验	N0	6322.1	0	90	90
856	Hebei province	2009年河北省辛集市马庄冬小麦氮肥不同基追比试验	N0	7434.8	0	90	90
857	Hebei province	2009年河北省辛集市马庄冬小麦氮肥不同基追比试验	N180-1P90K90	8875.1	180	90	90
863	Hebei province	2009年河北省辛集市马庄冬小麦氮肥不同基追比试验	N180-1P90K90	7279.5	180	90	90
868	Hebei province	2009年河北省辛集市马庄冬小麦氮肥不同基追比试验	N180-1P90K90	7814.3	180	90	90
876	Hebei province	2009年河北省辛集市马庄冬小麦氮肥不同基追比试验	N180-1P90K90	7615.9	180	90	90
878	Hebei province	2009年河北省辛集市马庄冬小麦氮肥不同基追比试验	N180-2P90K90	9315	180	90	90
883	Hebei province	2009年河北省辛集市马庄冬小麦氮肥不同基追比试验	N180-2P90K90	8124.8	180	90	90
888	Hebei province	2009年河北省辛集市马庄冬小麦氮肥不同基追比试验	N180-2P90K90	8047.1	180	90	90
895	Hebei province	2009年河北省辛集市马庄冬小麦氮肥不同基追比试验	N180-2P90K90	8987.3	180	90	90
899	Hebei province	2009年河北省辛集市马庄冬小麦氮肥不同基追比试验	N180-3P90K90	8625	180	90	90
904	Hebei province	2009年河北省辛集市马庄冬小麦氮肥不同基追比试验	N180-3P90K90	8530.1	180	90	90
909	Hebei province	2009年河北省辛集市马庄冬小麦氮肥不同基追比试验	N180-3P90K90	8443.9	180	90	90
916	Hebei province	2009年河北省辛集市马庄冬小麦氮肥不同基追比试验	N180-3P90K90	7909.1	180	90	90
920	Hebei province	2009年河北省辛集市马庄冬小麦氮肥不同基追比试验	N240-1P90K90	7158.8	240	90	90
925	Hebei province	2009年河北省辛集市马庄冬小麦氮肥不同基追比试验	N240-1P90K90	8107.5	240	90	90
931	Hebei province	2009年河北省辛集市马庄冬小麦氮肥不同基追比试验	N240-1P90K90	8676.8	240	90	90
936	Hebei province	2009年河北省辛集市马庄冬小麦氮肥不同基追比试验	N240-1P90K90	9547.9	240	90	90
937	Hebei province	2009年河北省辛集市马庄冬小麦氮肥不同基追比试验	N240-2P90K90	9004.5	240	90	90
943	Hebei province	2009年河北省辛集市马庄冬小麦氮肥不同基追比试验	N240-2P90K90	9729	240	90	90
948	Hebei province	2009年河北省辛集市马庄冬小麦氮肥不同基追比试验	N240-2P90K90	9133.9	240	90	90
956	Hebei province	2009年河北省辛集市马庄冬小麦氮肥不同基追比试验	N240-2P90K90	10125.8	240	90	90
958	Hebei province	2009年河北省辛集市马庄冬小麦氮肥不同基追比试验	N240-3P90K90	8495.6	240	90	90
963	Hebei province	2009年河北省辛集市马庄冬小麦氮肥不同基追比试验	N240-3P90K90	8331.8	240	90	90
968	Hebei province	2009年河北省辛集市马庄冬小麦氮肥不同基追比试验	N240-3P90K90	9030.4	240	90	90
975	Hebei province	2009年河北省辛集市马庄冬小麦氮肥不同基追比试验	N240-3P90K90	9349.5	240	90	90
	Hebei province	2009年河北省小麦氮肥运筹试验	N0	8008.9	0
	Hebei province	2009年河北省小麦氮肥运筹试验	N180(0/120/60)	8644.4	180
	Hebei province	2009年河北省小麦氮肥运筹试验	N180(30/90/60)	7933.3	180
	Hebei province	2009年河北省小麦氮肥运筹试验	N180(60/60/60)	8488.9	180
	Hebei province	2009年河北省小麦氮肥运筹试验	N240(0/160/80)	8848.9	240
	Hebei province	2009年河北省小麦氮肥运筹试验	N240(40/120/80)	8128.9	240
	Hebei province	2009年河北省小麦氮肥运筹试验	N240(80/80/80)	8137.8	240
53	Beijing	2008北京房山氮肥不同基追比对冬小麦养分需求与供应的影响	N0	6225	0	90	75
58	Beijing	2008北京房山氮肥不同基追比对冬小麦养分需求与供应的影响	N0	6350	0	90	75
64	Beijing	2008北京房山氮肥不同基追比对冬小麦养分需求与供应的影响	N0	6100	0	90	75
68	Beijing	2008北京房山氮肥不同基追比对冬小麦养分需求与供应的影响	N-1	6150	225	90	75
73	Beijing	2008北京房山氮肥不同基追比对冬小麦养分需求与供应的影响	N-1	6075	225	90	75
78	Beijing	2008北京房山氮肥不同基追比对冬小麦养分需求与供应的影响	N-1	6900	225	90	75
82	Beijing	2008北京房山氮肥不同基追比对冬小麦养分需求与供应的影响	N-2	6950	225	90	75
88	Beijing	2008北京房山氮肥不同基追比对冬小麦养分需求与供应的影响	N-2	7000	225	90	75
93	Beijing	2008北京房山氮肥不同基追比对冬小麦养分需求与供应的影响	N-2	6750	225	90	75
97	Beijing	2008北京房山氮肥不同基追比对冬小麦养分需求与供应的影响	N-3	6825	225	90	75
102	Beijing	2008北京房山氮肥不同基追比对冬小麦养分需求与供应的影响	N-3	6975	225	90	75
108	Beijing	2008北京房山氮肥不同基追比对冬小麦养分需求与供应的影响	N-3	7025	225	90	75
112	Beijing	2008北京房山氮肥不同基追比对冬小麦养分需求与供应的影响	N-4	6875	225	90	75
117	Beijing	2008北京房山氮肥不同基追比对冬小麦养分需求与供应的影响	N-4	7050	225	90	75
122	Beijing	2008北京房山氮肥不同基追比对冬小麦养分需求与供应的影响	N-4	7350	225	90	75
129	Beijing	2008北京房山冬小麦养分吸收规律研究	CK0	5225	0	0	0
135	Beijing	2008北京房山冬小麦养分吸收规律研究	CK0	5700	0	0	0
140	Beijing	2008北京房山冬小麦养分吸收规律研究	CK0	6225	0	0	0
144	Beijing	2008北京房山冬小麦养分吸收规律研究	OPT	6200	225	90	75
149	Beijing	2008北京房山冬小麦养分吸收规律研究	OPT	6400	225	90	75
155	Beijing	2008北京房山冬小麦养分吸收规律研究	OPT	6600	225	90	75
156	Beijing	2007.10-2008.6房山冬小麦钾肥不同基追比	K0	4409.8	225	90	0
157	Beijing		K1	5093.2	225	90	150
158	Beijing		K2	6902.4	225	90	150
159	Beijing		K3	5160	225	90	150
160	Beijing		K0	4535.4	225	90	0
161	Beijing		K1	4955.8	225	90	150
162	Beijing		K2	4822.7	225	90	150
163	Beijing		K3	5880.5	225	90	150
164	Beijing		K0	4660.9	225	90	0
165	Beijing		K1	5614.7	225	90	150
166	Beijing		K2	5844.8	225	90	150
167	Beijing		K3	4846.8	225	90	150
1	Hebei province	白洋淀沿湖农田施氮量对冬小麦产量和土壤硝态氮累积的影响
2	马堡	N0		3155	0	0	0
[truncated: 977 more rows]

## Sheet: data for MLRY
No.	data source	Treatments			Grain yield	FN	FP（P2O5）	FK（K2O）
1015	Jiangsu province
1016	通州十总小麦测土配方施肥示范简报
1017	刁锡华	PK			4518	0	60	90
1018		NPK（配方）			7368	189	60	90
1019		常规			7305	232.5	60	90
1020	刁锡明	PK			3225	0	60	90
1021		NPK（配方）			6609	175.5	60	90
1022		常规			6540	228	60	90
1023	喻凤生	PK			3180	0	60	90
1024		NPK（配方）			5790	171	60	90
1025		常规			5775	193.5	60	90
1041	林忠成	太湖地区土壤-作物系统氮素利用的综合研究		氮肥生理效率
1042	2008	N0	2010博士学位论文	-	3556.93	0	90	90
1043		N1		51.74	5586.74	75	90	90
1044		N2		39.4	6416.81	150	90	90
1045		N3		36.52	7464.08	225	90	90
1046		N4		29.98	7441.77	300	90	90
1047		N5		27.62	7497.85	375	90	90
1048	2009	N00		－	2256.13	0	90	90
1049		N11		46.53	5087.54	75	90	90
1050		N22		43.16	6933.47	150	90	90
1051		N33		35.93	7277.64	225	90	90
1052		N44		32.4	7523.26	300	90	90
1053		N55		29.26	7684.84	375	90	90
1054		N01		50.23	4427.21	75	90	90
1055		N02		38.99	5993	150	90	90
1056		N03		33.94	6497.25	225	90	90
1057		N04		30.02	7028.51	300	90	90
1058		N05		27.38	7413.2	375	90	90
1094	朱秀英 周马康 崔春梅 孙晓荣	小麦精确施氮对产量和氮肥利用率的影响
1095		N 0			5523	0	90	180
1096		N 1			7174.5	210	90	180
1097		N 2			6292.5	165	67.5	67.5
1115	周正权 郭文善	氮肥运筹对扬麦10号产量品质及其氮肥利用率的影响
1116		基施氮量0	追施氮量0		3371.7	0	150	150
1117		0	60		4260.8	60	150	150
1118		0	120		5374.7	120	150	150
1119		0	180		5965.7	180	150	150
1120		60	0		4138.6	60	150	150
1121		60	60		5574.8	120	150	150
1122		60	120		6672.8	180	150	150
1123		60	180		7431.9	240	150	150
1124		120	0		4879.5	120	150	150
1125		120	60		6930.2	180	150	150
1126		120	120		8425	240	150	150
1127		120	180		7517.6	300	150	150
1128		180	0		5675.1	180	150	150
1129		180	60		7218.6	240	150	150
1130		180	120		6331.5	300	150	150
1131		180	180		5733.9	300	150	150
1132	葛鑫 戴其根	淮北地区不同类型小麦氮肥施用技术的研究
1133	陕农229	0			3410.7	0	150	150
1134		65.6			4760	65.6	150	150
1135		131.3			6027	131.3	150	150
1136		196.9			7146.8	196.9	150	150
1137		262.5			7484.6	262.5	150	150
1138		328.1			6906.8	328.1	150	150
1139		393.8			5386.7	393.8	150	150
1140	济南17	0			3673.4	0	150	150
1141		65.6			4878.9	65.6	150	150
1142		131.3			5841.8	131.3	150	150
1143		196.9			6852.3	196.9	150	150
1144		262.5			7353.9	262.5	150	150
1145		328.1			7809	328.1	150	150
1146		393.8			5500.1	393.8	150	150
1147	陕农229	基追比10:0			6333	262.5	150	150
1148		9:1			6640.1	262.5	150	150
1149		8:2			6950.1	262.5	150	150
1150		7:3			7120.1	262.5	150	150
1151		6:4			7253.4	262.5	150	150
1152		5:5			7484.6	262.5	150	150
1153		4:6			7285.1	262.5	150	150
1154		3:7			7057.8	262.5	150	150
1155	济南17	基追比10:0			6670.1	262.5	150	150
1156		9:1			6848.9	262.5	150	150
1157		8:2			6915.6	262.5	150	150
1158		7:3			7022.8	262.5	150	150
1159		6:4			7180.1	262.5	150	150
1160		5:5			7353.9	262.5	150	150
1161		4:6			7222.2	262.5	150	150
1162		3:7			7057.8	262.5	150	150
1163	追氮时期	5(基):5(拔)			7353.9	262.5	150	150
1164		5(基):2.5(拔):2.5(花)			7023.8	262.5	150	150
1165		5(基):5(花)			6435.6	262.5	150	150
1181	谢学俭 沈其荣	苏南稻麦轮作农田系统土壤中磷氮的流失
1182		P0			2625	150	0
1183		P20			3315	150	20
1184		P40			3330	150	40
1185		P80			3330	150	80
1186		P160			3330	150	160
1187	杨勇 郭文善	晚播小麦高产优质栽培机理与技术研究
1188	播期10.30密度180	3:3.5:3.5			9551.1	180	108	108
1189	180	5:2.5:2.5			9211.8	180	108	108
1190	180	7:1.5:1.5			9009.15	180	108	108
1191	360	3:3.5:3.5			9067.05	180	108	108
1192	360	5;2.5:2.5			9313.65	180	108	108
1193	360	7:1.5:1.5			9070.35	180	108	108
1194	播期11.19密度180	3:3.5:3.5			8010.45	180	108	108
1195	180	5:2.5:2.5			8114.4	180	108	108
1196	180	7:1.5:1.5			7771.2	180	108	108
1197	360	3:3.5:3.5			9311.25	180	108	108
1198	360	5;2.5:2.5			9101.4	180	108	108
1199	360	7:1.5:1.5			8465.7	180	108	108
1200		膜侧沟播			7970.3	180	108	108
1201		覆膜穴播			8945.9	180	108	108
1202		露地高密			9311.3	180	108	108
1203		露地低密			8010.5	180	108	108
1204	王小军 张洪程	不同土壤肥力配方施肥对淮南小麦产量、品质及肥料吸收利用率的影响
1205	高肥力田扬麦11	N0P0K0			4826.7	0	0	0
1206		N0P2K2			5443.35	0	60	90
1207		N1P2K2			6472.8	97.5	60	90
1208		N2P0K2			7403.7	195	0	90
1209		N2P1K2			7540.5	195	30	90
1210		N2P2K2			7927.35	195	60	90
1211		N2P3K2			7036.35	195	90	90
1212		N2P2K0			7369.65	195	60	0
1213		N2P2K1			7699.65	195	90	45
1214		N2P2K3			7141.5	195	90	135
1215		N3P2K2			6978.75	292.5	60	90
1216		N1P1K2			6175.2	97.5	30	90
1217		N1P2K1			6511.8	97.5	60	45
1218		N2P1K1			7260.45	195	30	45
1219		N1.5P2K2			6618.75	146.25	60	90
1220		N2.5P2K2			7264.65	243.75	60	90
1221	高肥力田扬麦15	N0P0K0			3600	0	0	0
1222		N0P2K2			4250.1	0	60	90
1223		N1P2K2			7427.85	97.5	60	90
1224		N2P0K2			7522.8	195	0	90
1225		N2P1K2			7665	195	30	90
1226		N2P2K2			8138.4	195	60	90
1227		N2P3K2			7585.95	195	90	90
1228		N2P2K0			7679.7	195	60	0
1229		N2P2K1			7983.6	195	90	45
1230		N2P2K3			7291.2	195	90	135
1231		N3P2K2			7771.05	292.5	60	90
1232		N1P1K2			5920.35	97.5	30	90
1233		N1P2K1			6762.9	97.5	60	45
1234		N2P1K1			7771.05	195	30	45
1235		N1.5P2K2			7525.8	146.25	60	90
1236		N2.5P2K2			7899	243.75	60	90
1237	中肥力田扬麦11	N0P0K0			3056.85	0	0	0
1238		N0P2K2			3217.35	0	60	90
1239		N1P2K2			5983.65	97.5	60	90
1240		N2P0K2			6754.2	195	0	90
1241		N2P1K2			7069.35	195	30	90
1242		N2P2K2			7669.2	195	60	90
1243		N2P3K2			6886.65	195	90	90
1244		N2P2K0			6787.65	195	60	0
1245		N2P2K1			7391.85	195	90	45
1246		N2P2K3			6430.05	195	90	135
1247		N3P2K2			6872.7	292.5	60	90
1248		N1P1K2			5127.6	97.5	30	90
1249		N1P2K1			5488.8	97.5	60	45
1250		N2P1K1			7223.85	195	30	45
1251		N1.5P2K2			6153.75	146.25	60	90
1252		N2.5P2K2			7725	243.75	60	90
1253	中肥力田扬麦15	N0P0K0			2985.3	0	0	0
1254		N0P2K2			3642.15	0	60	90
1255		N1P2K2			5994.75	97.5	60	90
1256		N2P0K2			6671.4	195	0	90
1257		N2P1K2			6744.9	195	30	90
1258		N2P2K2			6994.5	195	60	90
1259		N2P3K2			6761.4	195	90	90
1260		N2P2K0			6731.85	195	60	0
1261		N2P2K1			6869.85	195	90	45
1262		N2P2K3			6807.9	195	90	135
1263		N3P2K2			7324.65	292.5	60	90
1264		N1P1K2			4500.3	97.5	30	90
1265		N1P2K1			5316.3	97.5	60	45
1266		N2P1K1			6925.65	195	30	45
1267		N1.5P2K2			6248.25	146.25	60	90
1268		N2.5P2K2			7403.25	243.75	60	90
1269	低肥力扬麦11	N0P0K0			2798.4	0	0	0
1270		N0P2K2			2879.7	0	60	90
1271		N1P2K2			4642.5	97.5	60	90
1272		N2P0K2			5895.3	195	0	90
1273		N2P1K2			6024.6	195	30	90
1274		N2P2K2			6498.9	195	60	90
1275		N2P3K2			6587.25	195	90	90
1276		N2P2K0			6453.3	195	60	0
1277		N2P2K1			6475.2	195	90
1278		N2P2K3			6579	195	90
1279		N3P2K2			6802.05	292.5	60	90
1280		N1P1K2			4805.85	97.5	30	90
1281		N1P2K1			5355.9	97.5	60	45
1282		N2P1K1			6103.2	195	30	45
1283		N1.5P2K2			5963.7	146.25	60	90
1284		N2.5P2K2			6718.8	243.75	60	90
1285	低肥力田扬麦15	N0P0K0			2669.55	0	0	0
1286		N0P2K2			2743.95	0	60	90
1287		N1P2K2			4672.35	97.5	60	90
1288		N2P0K2			5719.05	195	0	90
1289		N2P1K2			6368.7	195	30	90
1290		N2P2K2			6620.25	195	60	90
1291		N2P3K2			6758.85	195	90	90
1292		N2P2K0			6095.25	195	60	0
1293		N2P2K1			6527.25	195	90	45
1294		N2P2K3			6705.3	195	90	135
1295		N3P2K2			7412.55	292.5	60	90
1296		N1P1K2			4637.4	97.5	30	90
1297		N1P2K1			4998.75	97.5	60	45
1298		N2P1K1			7133.1	195	30	45
1299		N1.5P2K2			5487.45	146.25	60	90
1300		N2.5P2K2			7201.05	243.75	60	90
1301	朱秀英 周马康 崔春梅 孙晓荣	小麦精确施氮对产量和氮肥利用率的影响
1302			N 0		5523	0	90	180
1303			N 1		7174.5	210	90	180
1304			N 2		6292.5	165	67.5	67.5
1420	黄严帅 张洪程	氮肥用量和运筹对不同类型专用小麦产量形成及氮素吸收利用的影响
1421	高邮地点 扬麦11	2001-2002	N0		3571.5	0	90	135
1422			N1		5020.5	56.25	90	135
1423			N2		5536.5	112.5	90	135
1424			N3		5775	168.75	90	135
1425			N4		6117	225	90	135
1426			N5		5838	281.25	90	135
1427			N6		5647.5	337.5	90	135
1428	扬州地点	2001-2002	N0		3549	0	150	300
1429			N1		5068.5	56.25	150	300
1430			N2		5551.5	112.5	150	300
1431			N3		6214.5	168.75	150	300
1432			N4		6523.5	225	150	300
1433			N5		5994	281.25	150	300
1434			N6		5697	337.5	150	300
1435	高邮 宁麦9号	2001-2002	N0		3489	0	90	135
1436			N1		4722	56.25	90	135
1437			N2		5169	112.5	90	135
1438			N3		5779.5	168.75	90	135
1439			N4		6190.5	225	90	135
1440			N5		6079.5	281.25	90	135
1441			N6		5640	337.5	90	135
1442	扬州地点	2001-2002	N0		3567	0	150	300
1443			N1		4570.5	56.25	150	300
1444			N2		5652	112.5	150	300
1445			N3		6316.5	168.75	150	300
1446			N4		6735	225	150	300
1447			N5		6231	281.25	150	300
1448			N6		6127.5	337.5	150	300
1449	高邮 扬麦11	基追比10:0			5425.5	225	150	300
1450		9:1			5673	225	90	135
1451		8:2			5886	225	90	135
1452		7:3			6079.5	225	90	135
1453		6:4			6283.5	225	90	135
1454		5:5			6117	225	90	135
1455		4:6			5941.5	225	90	135
1456		3:7			5767.5	225	90	135
1457	扬州地点	基追比10:0			6033	225	150	300
1458		9:1			6225	225	150	300
1459		8:2			6409.5	225	150	300
1460		7:3			6487.5	225	150	300
1461		6:4			6771	225	150	300
1462		5:5			6523.5	225	150	300
1463		4:6			6201	225	150	300
1464		3:7			5835	225	150	300
1465	高邮 宁麦9号	基追比10:0			5734.5	225	150	300
1466		9:1			5902.5	225	90	135
1467		8:2			6093	225	90	135
1468		7:3			6139.5	225	90	135
1469		6:4			6339	225	90	135
1470		5:5			6190.5	225	90	135
1471		4:6			5946	225	90	135
1472		3:7			5853	225	90	135
1473	扬州地点	基追比10:0			6603	225	150	300
1474		9:1			6249	225	150	300
1475		8:2			6331.5	225	150	300
1476		7:3			6510	225	150	300
1477		6:4			7042.5	225	150	300
1478		5:5			6735	225	150	300
1479		4:6			6294	225	150	300
1480		3:7			6183	225	150	300
1898	Hunan province
1899	唐旭 马义兵	小麦-玉米轮作土壤磷素长期演变规律研究
1900		祁阳	CK		405
1901		1991-2005	N		446
1902			NP		469
1903			NK		1106
1904			NPK		1336
1905			NPKM		1516		52.4
1906			NPKSt		1672		52.4
157	Hubei province	2007-08年湖北省潜江市小麦氮同步研究机制	N0P120K105	氮肥用量	3301.7	0	120	105
163		2007-08年湖北省潜江市小麦氮同步研究机制	N0P120K105	氮肥用量	3276.6	0	120	105
169		2007-08年湖北省潜江市小麦氮同步研究机制	N0P120K105	氮肥用量	3902	0	120	105
175		2007-08年湖北省潜江市小麦氮同步研究机制	N225/2P120K105	氮肥用量	4252.1	225	120	105
182		2007-08年湖北省潜江市小麦氮同步研究机制	N225/2P120K105	氮肥用量	4239.6	225	120	105
188		2007-08年湖北省潜江市小麦氮同步研究机制	N225/2P120K105	氮肥用量	4247.1	225	120	105
194		2007-08年湖北省潜江市小麦氮同步研究机制	N180/2P120K105	氮肥用量	4252.1	180	120	105
200		2007-08年湖北省潜江市小麦氮同步研究机制	N180/2P120K105	氮肥用量	4327.2	180	120	105
207		2007-08年湖北省潜江市小麦氮同步研究机制	N180/2P120K105	氮肥用量	4402.2	180	120	105
213		2007-08年湖北省潜江市小麦氮同步研究机制	N158/2P120K105	氮肥用量	4252.1	157.5	120	105
219		2007-08年湖北省潜江市小麦氮同步研究机制	N158/2P120K105	氮肥用量	4252.1	157.5	120	105
225		2007-08年湖北省潜江市小麦氮同步研究机制	N158/2P120K105	氮肥用量	4302.2	157.5	120	105
231		2007-08年湖北省潜江市小麦氮同步研究机制	N135/2P120K105	氮肥用量	4252.1	135	120	105
238		2007-08年湖北省潜江市小麦氮同步研究机制	N135/2P120K105	氮肥用量	4577.3	135	120	105
244		2007-08年湖北省潜江市小麦氮同步研究机制	N135/2P120K105	氮肥用量	4902.5	135	120	105
250		2007-08年湖北省潜江市小麦氮同步研究机制	N158/3P120K105	氮肥用量	4102.1	157.5	120	105
256		2007-08年湖北省潜江市小麦氮同步研究机制	N158/3P120K105	氮肥用量	4527.3	157.5	120	105
263		2007-08年湖北省潜江市小麦氮同步研究机制	N158/3P120K105	氮肥用量	4552.3	157.5	120	105
269		2007-08年湖北省潜江市小麦氮同步研究机制	N158/4P120K105	氮肥用量	4102.1	157.5	120	105
275		2007-08年湖北省潜江市小麦氮同步研究机制	N158/4P120K105	氮肥用量	4877.4	157.5	120	105
281		2007-08年湖北省潜江市小麦氮同步研究机制	N158/4P120K105	氮肥用量	4489.7	157.5	120	105
392		2009年湖北省小麦氮素用量研究	N0(0-0-0)PK	氮肥用量	1544	0	90	120
400		2009年湖北省小麦氮素用量研究	N0(0-0-0)PK	氮肥用量	2042	0	90	120
406		2009年湖北省小麦氮素用量研究	N0(0-0-0)PK	氮肥用量	1499	0	90	120
412		2009年湖北省小麦氮素用量研究	N0(0-0-0)PK	氮肥用量	1543	0	90	120
414		2009年湖北省小麦氮素用量研究	N60(20-20-20)PK	氮肥用量	2660	60	90	120
421		2009年湖北省小麦氮素用量研究	N60(20-20-20)PK	氮肥用量	2907	60	90	120
427		2009年湖北省小麦氮素用量研究	N60(20-20-20)PK	氮肥用量	2649	60	90	120
433		2009年湖北省小麦氮素用量研究	N60(20-20-20)PK	氮肥用量	2740	60	90	120
440		2009年湖北省小麦氮素用量研究	N120(0-80-40)PK	氮肥用量	3053	120	90	120
448		2009年湖北省小麦氮素用量研究	N120(0-80-40)PK	氮肥用量	2985	120	90	120
454		2009年湖北省小麦氮素用量研究	N120(0-80-40)PK	氮肥用量	2531	120	90	120
460		2009年湖北省小麦氮素用量研究	N120(0-80-40)PK	氮肥用量	3076	120	90	120
462		2009年湖北省小麦氮素用量研究	N120(20-60-40)PK	氮肥用量	2674	120	90	120
469		2009年湖北省小麦氮素用量研究	N120(20-60-40)PK	氮肥用量	3174	120	90	120
475		2009年湖北省小麦氮素用量研究	N120(20-60-40)PK	氮肥用量	2576	120	90	120
481		2009年湖北省小麦氮素用量研究	N120(20-60-40)PK	氮肥用量	2769	120	90	120
488		2009年湖北省小麦氮素用量研究	N120(40-40-40)PK	氮肥用量	3000	120	90	120
496		2009年湖北省小麦氮素用量研究	N120(40-40-40)PK	氮肥用量	2945	120	90	120
502		2009年湖北省小麦氮素用量研究	N120(40-40-40)PK	氮肥用量	2851	120	90	120
508		2009年湖北省小麦氮素用量研究	N120(40-40-40)PK	氮肥用量	2567	120	90	120
510		2009年湖北省小麦氮素用量研究	N180(0-120-60)PK	氮肥用量	2438	180	90	120
517		2009年湖北省小麦氮素用量研究	N180(0-120-60)PK	氮肥用量	3080	180	90	120
523		2009年湖北省小麦氮素用量研究	N180(0-120-60)PK	氮肥用量	2300	180	90	120
529		2009年湖北省小麦氮素用量研究	N180(0-120-60)PK	氮肥用量	2756	180	90	120
536		2009年湖北省小麦氮素用量研究	N180(30-90-60)PK	氮肥用量	2725	180	90	120
544		2009年湖北省小麦氮素用量研究	N180(30-90-60)PK	氮肥用量	2153	180	90	120
550		2009年湖北省小麦氮素用量研究	N180(30-90-60)PK	氮肥用量	2375	180	90	120
556		2009年湖北省小麦氮素用量研究	N180(30-90-60)PK	氮肥用量	2308	180	90	120
558		2009年湖北省小麦氮素用量研究	N180(60-60-60)PK	氮肥用量	2940	180	90	120
565		2009年湖北省小麦氮素用量研究	N180(60-60-60)PK	氮肥用量	2272	180	90	120
571		2009年湖北省小麦氮素用量研究	N180(60-60-60)PK	氮肥用量	1796	180	90	120
577		2009年湖北省小麦氮素用量研究	N180(60-60-60)PK	氮肥用量	2462	180	90	120
584		2009年湖北省小麦氮素用量研究	N240(80-80-80)PK	氮肥用量	1839	240	90	120
592		2009年湖北省小麦氮素用量研究	N240(80-80-80)PK	氮肥用量	1541	240	90	120
598		2009年湖北省小麦氮素用量研究	N240(80-80-80)PK	氮肥用量	1740	240	90	120
604		2009年湖北省小麦氮素用量研究	N240(80-80-80)PK	氮肥用量	1756	240	90	120
606		2009年湖北省小麦氮素用量研究	N300(100-100-100)PK	氮肥用量	2294	300	90	120
613		2009年湖北省小麦氮素用量研究	N300(100-100-100)PK	氮肥用量	1853	300	90	120
619		2009年湖北省小麦氮素用量研究	N300(100-100-100)PK	氮肥用量	1666	300	90	120
625		2009年湖北省小麦氮素用量研究	N300(100-100-100)PK	氮肥用量	1826	300	90	120
647		2008-2009湖北省冬小麦SPAD阈值确定与应用试验	CK(N=0)	施肥时期	1660	0	90	120
653		2008-2009湖北省冬小麦SPAD阈值确定与应用试验	CK(N=0)	施肥时期	1404	0	90	120
661		2008-2009湖北省冬小麦SPAD阈值确定与应用试验	CK(N=0)	施肥时期	1716	0	90	120
667		2008-2009湖北省冬小麦SPAD阈值确定与应用试验	CK(N=0)	施肥时期	1580	0	90	120
669		2008-2009湖北省冬小麦SPAD阈值确定与应用试验	FP(N=195)	施肥时期	1648	195	90	120
675		2008-2009湖北省冬小麦SPAD阈值确定与应用试验	FP(N=195)	施肥时期	1830	195	90	120
682		2008-2009湖北省冬小麦SPAD阈值确定与应用试验	FP(N=195)	施肥时期	2249	195	90	120
688		2008-2009湖北省冬小麦SPAD阈值确定与应用试验	FP(N=195)	施肥时期	1810	195	90	120
695		2008-2009湖北省冬小麦SPAD阈值确定与应用试验	无基肥(N)时的N追肥管理(S0)	施肥时期	2841	130	90	120
701		2008-2009湖北省冬小麦SPAD阈值确定与应用试验	无基肥(N)时的N追肥管理(S0)	施肥时期	2623	130	90	120
709		2008-2009湖北省冬小麦SPAD阈值确定与应用试验	无基肥(N)时的N追肥管理(S0)	施肥时期	2580	130	90	120
715		2008-2009湖北省冬小麦SPAD阈值确定与应用试验	无基肥(N)时的N追肥管理(S0)	施肥时期	2510	130	90	120
717		2008-2009湖北省冬小麦SPAD阈值确定与应用试验	较少基肥(N)时的N追肥管理（S40）	施肥时期	2649	130	90	120
723		2008-2009湖北省冬小麦SPAD阈值确定与应用试验	较少基肥(N)时的N追肥管理（S40）	施肥时期	2519	130	90	120
730		2008-2009湖北省冬小麦SPAD阈值确定与应用试验	较少基肥(N)时的N追肥管理（S40）	施肥时期	2780	130	90	120
736		2008-2009湖北省冬小麦SPAD阈值确定与应用试验	较少基肥(N)时的N追肥管理（S40）	施肥时期	2621	130	90	120
743		2008-2009湖北省冬小麦SPAD阈值确定与应用试验	较高基肥(N)时的N追肥管理（S80）	施肥时期	2360	130	90	120
749		2008-2009湖北省冬小麦SPAD阈值确定与应用试验	较高基肥(N)时的N追肥管理（S80）	施肥时期	2778	130	90	120
757		2008-2009湖北省冬小麦SPAD阈值确定与应用试验	较高基肥(N)时的N追肥管理（S80）	施肥时期	3127	130	90	120
763		2008-2009湖北省冬小麦SPAD阈值确定与应用试验	较高基肥(N)时的N追肥管理（S80）	施肥时期	2706	130	90	120
765		2009-10年湖北省小麦氮素基施条件的研究	N0P90K120	施肥时期	1130	0	90	120
768		2009-10年湖北省小麦氮素基施条件的研究	N0P90K120	施肥时期	1326	0	90	120
771		2009-10年湖北省小麦氮素基施条件的研究	N0P90K120	施肥时期	1263	0	90	120
775		2009-10年湖北省小麦氮素基施条件的研究	N0/60P90K120	施肥时期	2700	60	90	120
778		2009-10年湖北省小麦氮素基施条件的研究	N0/60P90K120	施肥时期	2552	60	90	120
782		2009-10年湖北省小麦氮素基施条件的研究	N0/60P90K120	施肥时期	2805	60	90	120
783		2009-10年湖北省小麦氮素基施条件的研究	N30/60P90K120	施肥时期	3152	90	90	120
786		2009-10年湖北省小麦氮素基施条件的研究	N30/60P90K120	施肥时期	3453	90	90	120
789		2009-10年湖北省小麦氮素基施条件的研究	N30/60P90K120	施肥时期	3043	90	90	120
794		2009-10年湖北省小麦氮素基施条件的研究	N0/90P90K120	施肥时期	2773	90	90	120
797		2009-10年湖北省小麦氮素基施条件的研究	N0/90P90K120	施肥时期	3043	90	90	120
800		2009-10年湖北省小麦氮素基施条件的研究	N0/90P90K120	施肥时期	2735	90	90	120
801		2009-10年湖北省小麦氮素基施条件的研究	N45/90P90K120	施肥时期	3346	135	90	120
804		2009-10年湖北省小麦氮素基施条件的研究	N45/90P90K120	施肥时期	3766	135	90	120
807		2009-10年湖北省小麦氮素基施条件的研究	N45/90P90K120	施肥时期	3598	135	90	120
812		2009-10年湖北省小麦氮素基施条件的研究	N0/120P90K120	施肥时期	3085	120	90	120
813		2009-10年湖北省小麦氮素基施条件的研究	N0/120P90K120	施肥时期	2991	120	90	120
816		2009-10年湖北省小麦氮素基施条件的研究	N0/120P90K120	施肥时期	3209	120	90	120
819		2009-10年湖北省小麦氮素基施条件的研究	N60/120P90K120	施肥时期	3440	180	90	120
822		2009-10年湖北省小麦氮素基施条件的研究	N60/120P90K120	施肥时期	3889	180	90	120
826		2009-10年湖北省小麦氮素基施条件的研究	N60/120P90K120	施肥时期	3555	180	90	120
828		2009-10年湖北省小麦氮素基施条件的研究	N120/60P90K120	施肥时期	3475	180	90	120
831		2009-10年湖北省小麦氮素基施条件的研究	N120/60P90K120	施肥时期	3245	180	90	120
834		2009-10年湖北省小麦氮素基施条件的研究	N120/60P90K120	施肥时期	3856	180	90	120
977		2009-10年湖北省小麦SPAD阈值应用研究	N0	施肥方法	1603	0	90	120
980		2009-10年湖北省小麦SPAD阈值应用研究	N0	施肥方法	1808	0	90	120
983		2009-10年湖北省小麦SPAD阈值应用研究	N0	施肥方法	1722	0	90	120
988		2009-10年湖北省小麦SPAD阈值应用研究	FP	施肥方法	4438	180	90	120
991		2009-10年湖北省小麦SPAD阈值应用研究	FP	施肥方法	4322	180	90	120
994		2009-10年湖北省小麦SPAD阈值应用研究	FP	施肥方法	4095	180	90	120
995		2009-10年湖北省小麦SPAD阈值应用研究	S42	施肥方法	3519	60	90	120
999		2009-10年湖北省小麦SPAD阈值应用研究	S42	施肥方法	3283	60	90	120
1002		2009-10年湖北省小麦SPAD阈值应用研究	S42	施肥方法	3700	60	90	120
1006		2009-10年湖北省小麦SPAD阈值应用研究	S44	施肥方法	3488	80	90	120
1009		2009-10年湖北省小麦SPAD阈值应用研究	S44	施肥方法	3487	80	90	120
1012		2009-10年湖北省小麦SPAD阈值应用研究	S44	施肥方法	3327	80	90	120
1014		2009-10年湖北省小麦SPAD阈值应用研究	S46	施肥方法	3784	80	90	120
1017		2009-10年湖北省小麦SPAD阈值应用研究	S46	施肥方法	4300	80	90	120
1021		2009-10年湖北省小麦SPAD阈值应用研究	S46	施肥方法	4210	80	90	120
1024		2009-10年湖北省小麦SPAD阈值应用研究	S48	施肥方法	4032	100	90	120
1027		2009-10年湖北省小麦SPAD阈值应用研究	S48	施肥方法	4358	100	90	120
1030		2009-10年湖北省小麦SPAD阈值应用研究	S48	施肥方法	4314	100	90	120
1033		2009-10年湖北省小麦SPAD阈值应用研究	S42-44	施肥方法	3668	120	90	120
1036		2009-10年湖北省小麦SPAD阈值应用研究	S42-44	施肥方法	4089	120	90	120
1039		2009-10年湖北省小麦SPAD阈值应用研究	S42-44	施肥方法	3941	120	90	120
1042		2009-10年湖北省小麦SPAD阈值应用研究	S44-46	施肥方法	4049	100	90	120
1043		2009-10年湖北省小麦SPAD阈值应用研究	S44-46	施肥方法	3861	100	90	120
1046		2009-10年湖北省小麦SPAD阈值应用研究	S44-46	施肥方法	3997	100	90	120
1051		2009-10年湖北省小麦SPAD阈值应用研究	S46-48	施肥方法	4218	100	90	120
1054		2009-10年湖北省小麦SPAD阈值应用研究	S46-48	施肥方法	4021	100	90	120
1057		2009-10年湖北省小麦SPAD阈值应用研究	S46-48	施肥方法	4236	100	90	120
691	Hubei province
692	熊桂云，刘冬碧，巴瑞先，杨利，张富林，张继铭，余延丰	丹江口库区小麦和油菜氮合理用量研究
693		N0			2867	0	90	75
694		N75.0			4278	75	90	75
695		N150.0			5156	150	90	75
696		N225.0			5334	225	90	75
697		N300.0			5345	300	90	75
Jiangsu province
1026	晏娟1, 2,尹斌2,张绍林2,沈其荣1*,朱兆良2	太湖地区稻麦轮作系统中氮肥效应的研究		氮肥生理利用率	太湖地区稻麦轮作系统中氮肥效应的研究
1027		N0			2080	0	60	120
1028		N100		44.3	4000	100	60	120
1029		N150		40.6	4520	150	60	120
1030		N200		37.3	4690	200	60	120
1031		N250		35.1	4790	250	60	120
1032		N300		30.7	4930	300	60	120
1033		N350		22.6	4330	350	60	120
1034		N0			2180	0	60	120
1035		N100		54	3680	100	60	120
1036		N150		48	4220	150	60	120
1037		N200		40	4410	200	60	120
1038		N250		39.4	4760	250	60	120
1039		N300		34.4	4810	300	60	120
1040		N350		27.6	4760	350	60	120
1059	石祖梁,李丹丹,荆 奇,姜 东,曹卫星,戴廷波	氮肥运筹对稻茬冬小麦土壤无机氮时空分布及氮肥利用的影响
1060	宁麦9号	N0			3421.33	0	100	150
1061		N1			5930.22	225	100	150
1062		N2			6247.56	225	100	150
1063		N3			6854.23	225	100	150
1064		N4			6630.67	225	100	150
1065	豫麦34	N0			3325.33	225	100	150
1066		N1			6880.11	225	100	150
1067		N2			7335.12	225	100	150
1068		N3			7630.67	225	100	150
1069		N4			7402.67	225	100	150
1070	张均华 刘建立,张佳宝 赵夫涛 程亚南 王伟鹏	施氮量对稻麦干物质转运与氮肥利用的影响		氮素生理效率
1071	2007–2008年麦季	N0		43.81	3214	0	56	56
1072		N1		32.81	4792	94	56	56
1073		N2		25.94	6487	169	56	56
1074		N3			6584	244	56	56
1075	2008–2009年麦季	N0		31.66	3425	0	56	56
1076		N1		21.12	5148	94	56	56
1077		N2		17.26	5952	169	56	56
1078		N3			6213	244	56	56
1079	谭和芳, 谢金学, 汪吉东, 薛冬娥, 张永春, 常志州	氮磷钾不同配比对小麦产量及肥料利用率的影响
1080		N0P0K0			2167.1	0	0	0
1081		N0P2K2			2291.6	0	75	112.5
1082		N1P2K2			4367.3	94.5	75	112.5
1083		N2P0K2			4206.4	199	0	112.5
1084		N2P1K2			4929	199	37.5	112.5
1085		N2P2K2			4951.1	199	75	112.5
1086		N2P3K2			4602	199	112.5	112.5
1087		N2P2K0			3998.3	199	75	0
1088		N2P2K1			4658.3	199	75	56.25
1089		N2P2K3			4501.5	199	75	168.75
1090		N3P2K2			4756.1	293.5	75	112.5
1091		N1P1K2			3889.1	94.5	37.5	112.5
1092		N1P2K1			3313.1	94.5	75	56.25
1093		N2P1K1			3765	94.5	37.5	56.25
1098	张宪 曹卫星	不同氮肥运筹下专用小麦氮素利用特征及诊断指标的研究
1099	淮麦18	CK			5572	0	120	150
1100		HL			6403	120	120	150
1101		HM			7329	210	120	150
1102		HH			7195	300	120	150
1103		HB			7660	210	120	150
1104	徐州26	CK			5281	0	120	150
1105		XL			6797	120	120	150
1106		XM			7546	210	120	150
1107		XH			7503	300	120	150
1108		XB			7737	210	120	150
1166	李荣刚 戴其根 皮家欢	江苏太湖稻麦两熟地区生态、经济施氮量的初步研究
1167		0			2603	0	67.5	157.5
1168		180			4090	180	67.5	157.5
1169		225			4284	225	67.5	157.5
1170		270			4460	270	67.5	157.5
1171		315			4419	315	67.5	157.5
1172	张影 郭文善	弱筋小麦宁麦9号籽粒品质的形成特性及调控研究
1173	密度150万/ha	施氮量180	氮肥运筹5:1:4		6683.4
1174			7:1:2		6260.4
1175		240	5:1:4		6779.7
1176			7:1:2		6480.15
1177	密度240	施氮量180	氮肥运筹5:1:4		6125.85
1178			7:1:2		5606.55
1179		240	5:1:4		6867.6
1180			7:1:2		6448.35
1305	姜宗庆,封超年*,黄联联,郭文善,朱新开,彭永欣	施磷量对小麦物质生产及吸磷特性的影响
1306		扬麦12号	P0		4999.33	180	0	108
1307			P1		5470.11	180	36	108
1308			P2		5930.24	180	72	108
1309			P3		6600.61	180	108	108
1310			P4		6460.17	180	144	108
1311			P5		6211.35	180	180	108
1312		扬麦9号	P0		5114.47	180	0	108
1313			P1		5540.31	180	36	108
1314			P2		6208.13	180	72	108
1315			P3		6789.96	180	108	108
1316			P4		6669.85	180	144	108
1317			P5		6530.38	180	180	108
1318	朱新开 郭文善 周正权	氮肥对中筋小麦扬麦10号氮素吸收、产量和品质的调节效应
1319	基施氮量0	追施氮量0			3371.75	0	150	150
1320	0	60			4260.75	60	150	150
1321	0	120			5374.68	120	150	150
1322	0	180			5965.68	180	150	150
1323	60	0			4138.65	60	150	150
1324	60	60			5574.81	120	150	150
1325	60	120			6672.85	180	150	150
1326	60	180			7431.89	240	150	150
1327	120	0			4879.48	120	150	150
1328	120	60			6930.2	180	150	150
1329	120	120			8425	240	150	150
1330	120	180			7517.56	300	150	150
1331	180	0			5675.1	180	150	150
1332	180	60			7218.59	240	150	150
1333	180	120			6331.52	300	150	150
1334	180	180			5733.86	360	150	150
1335	李伟海 张洪程	不同土壤肥力施肥配方及水平对小麦产量、品质和肥料利用率的影响		氮肥生理利用率
1336	淮19 高肥田		N0	38.87	4685.25	0	90	135
1337			N135	50.14	7975.83	135	90	135
1338			N202.5	34.95	8055.9	202.5	90	135
1339			N270	35.03	7907.93	270	90	135
1340			N337.5	32.66	7117.28	337.5	90	135
1341			N405	32.14	6816.53	405	90	135
1342	淮19 中肥田		N0	54.35	4430.18	0	90	135
1343			N135	55.91	6318.35	135	90	135
1344			N202.5	43.47	7624.43	202.5	90	135
1345			N270	34.98	7706.25	270	90	135
1346			N337.5	32.88	6768.3	337.5	90	135
1347			N405	39.38	6354.53	405	90	135
1348	淮19 低肥田		N0	54.79	3554.03	0	90	135
1349			N135	45.46	5301.83	135	90	135
1350			N202.5	39.33	6361.5	202.5	90	135
1351			N270	34.57	6368.63	270	90	135
1352			N337.5	27.64	6500.65	337.5	90	135
1353			N405	28.58	6214.95	405	90	135
1354	烟19 高肥田		N0	48.96	4910.25	0	90	135
1355			N135	58.97	7298.33	135	90	135
1356			N202.5	39.29	8205.9	202.5	90	135
1357			N270	39.32	8035.43	270	90	135
1358			N337.5	41.81	7349.78	337.5	90	135
1359			N405	42.04	7026.53	405	90	135
1360	烟19 中肥田		N0	54.19	4505.18	0	90	135
1361			N135	51.55	6043.35	135	90	135
1362			N202.5	43.92	6929.93	202.5	90	135
1363			N270	35.93	7751.25	270	90	135
1364			N337.5	35.23	6835.8	337.5	90	135
1365			N405	34.6	6392.03	405	90	135
1366	烟19 低肥田		N0	61.57	3516.53	0	90	135
1367			N135	54.43	5286.83	135	90	135
1368			N202.5	46.17	6129	202.5	90	135
1369			N270	45.18	6331.13	270	90	135
1370			N337.5	34.16	6625.65	337.5	90	135
1371			N405	40.25	6252.45	405	90	135
1372	淮19 高肥力		P0	49.44	7212.38	270	0	135
1373			P45	36.51	7596.38	270	45	135
1374			P90	30.54	7907.93	270	90	135
1375			P135	35.07	7580.78	270	135	135
1376	淮19 中肥田		P0	48.77	6855.45	270	0	135
1377			P45	38.07	7327.05	270	45	135
1378			P90	31.98	7706.25	270	90	135
1379			P135	38.74	7432.5	270	135	135
1380	淮19 低肥田		P0	54.16	5606.03	270	0	135
1381			P45	37.62	6076.58	270	45	135
1382			P90	34.9	6368.63	270	90	135
1383			P135	32.94	6467.63	270	135	135
1384	烟19 高肥田		P0	69.41	7151.03	270	0	135
1385			P45	46.81	7642.28	270	45	135
1386			P90	34.86	8035.43	270	90	135
1387			P135	39.82	7601.03	270	135	135
1388	烟19 中肥田		P0	56.71	6871.43	270	0	135
1389			P45	41.45	7409.7	270	45	135
1390			P90	37.23	7751.25	270	90	135
1391			P135	38.6	7432.5	270	135	135
1392	烟19 低肥田		P0	56.33	5659.13	270	0	135
1393			P45	40.69	6121.58	270	45	135
1394			P90	40.65	6331.13	270	90	135
1395			P135	35.99	6383.78	270	135	135
1396	淮19 高肥力		K0	44.43	7195.88	270	90	0
1397			K67.5	35.71	7532.93	270	90	67.5
1398			K135	32.05	7907.93	270	90	135
1399			K202.5	33.73	7565.78	270	90	202.5
1400	淮19 中肥田		K0	53.77	6821.78	270	90	0
1401			K67.5	37.34	7198.95	270	90	67.5
1402			K135	36.1	7706.25	270	90	135
1403			K202.5	36.78	7473	270	90	202.5
1404	淮19 低肥田		K0	47.85	5681.1	270	90	0
1405			K67.5	36.42	6048.9	270	90	67.5
1406			K135	34.9	6368.63	270	90	135
1407			K202.5	30.65	6400	270	90	202.5
1408	烟19 高肥田		K0	56.69	7206.83	270	90	0
1409			K67.5	42.44	7570.8	270	90	67.5
1410			K135	36.63	8035.43	270	90	135
1411			K202.5	39.12	7691.95	270	90	202.5
1412	烟19 中肥田		K0	62.25	6835.5	270	90	0
1413			K67.5	45.87	7241.7	270	90	67.5
1414			K135	39.93	7751.25	270	90	135
1415			K202.5	41.17	7476.3	270	90	202.5
1416	烟19 低肥田		K0	66.83	5716.5	270	90	0
1417			K67.5	44.6	6157.35	270	90	67.5
1418			K135	42.2	6331.13	270	90	135
1419			K202.5	38.25	6506.1	270	90	202.5
1502	孙传范 戴廷波 荆 奇 姜 东 曹卫星	小麦品种氮利用效率的评价指标及其氮营养特性研究*
1503		南京点			6194	210	120	135
1504					5425	210	120	135
1505					5787	210	120	135
1506					5154	210	120	135
1507					5877	210	120	135
1508					4566	210	120	135
1509					4476	210	120	135
1510					5832	210	120	135
1511					6284	210	120	135
1512					3255	210	120	135
1513					5923	210	120	135
1514					5696	210	120	135
1515					5562	210	120	135
1516					5154	210	120	135
1517					4476	210	120	135
1518					5696	210	120	135
1519					5018	210	120	135
1520					5290	210	120	135
1521					5064	210	120	135
1522					5380	210	120	135
1523					5968	210	120	135
1524					5470	210	120	135
1525					4521	210	120	135
1526					4702	210	120	135
1527					4431	210	120	135
1528					5290	210	120	135
1529					5470	210	120	135
1530					4883	210	120	135
1531					5244	210	120	135
1532					6375	210	120	135
1533					4159	210	120	135
1534					4611	210	120	135
1535					5832	210	120	135
1536					5606	210	120	135
1537					4205	210	120	135
1538					5516	210	120	135
1539					3526	210	120	135
1540					5209	210	120	135
1541					3662	210	120	135
1542					5064	210	120	135
1543
1544		徐州点	品种		6795	270	120	135
1545					5985	270	120	135
1546					4905	270	120	135
1547					6210	270	120	135
1548					5760	270	120	135
1549					5670	270	120	135
1550					5355	270	120	135
1551					5985	270	120	135
1552					4815	270	120	135
1553					5670	270	120	135
1554					5715	270	120	135
1555					4905	270	120	135
1556					5490	270	120	135
1557					5580	270	120	135
1558					5400	270	120	135
1559					5670	270	120	135
1560					4905	270	120	135
1561					5355	270	120	135
1562					6120	270	120	135
1563					6840	270	120	135
1564					6705	270	120	135
1565					6030	270	120	135
1566					5580	270	120	135
1567					5085	270	120	135
1568					5220	270	120	135
1569					5265	270	120	135
1570					6120	270	120	135
1571					6120	270	120	135
1572					6525	270	120	135
1573					5265	270	120	135
1574					5355	270	120	135
1575					4725	270	120	135
1576					5715	270	120	135
1577					5715	270	120	135
1578					5940	270	120	135
1579					6615	270	120	135
1580					5985	270	120	135
1581					5130	270	120	135
1582					6075	270	120	135
1583					5715	270	120	135
1584	孙传范 曹卫星	小麦氮素利用效率的生理生态与氮肥调控研究
1585	全施KNO3	CK			6150	180	45	150
1586	基肥NH4NO3+DCD	A			7818	180	45	150
1587	分蘖肥NH4NO3+DCD	B			7962	180	45	150
1588	拔节肥NH4NO3+DCD	C			6346.5	180	45	150
1589	孕穗肥NH4NO3+DCD	D			7234.5	180	45	150
1590	4个时期NH4NO3+DCD	E			7479	180	45	150
Anhui province
1592	杜世州	氮素运筹对淮北地区超高产小麦养分吸收利用的影响
1593	烟农19	10∶0			8730	270	105	225
1594		9∶1			9049.5	270	105	225
1595		8∶2			9136.5	270	105	225
1596		7∶3			9297	270	105	225
1597		6∶4			9465	270	105	225
1598		5∶5			9931.5	270	105	225
1599		4∶6			9873	270	105	225
1600		无肥区NoN			4744.95	0	105	225
1601	皖麦50	10∶0			8844	270	105	225
1602		9∶1			9150	270	105	225
1603		8∶2			9331.5	270	105	225
1604		7∶3			9384	270	105	225
1605		6∶4			9852	270	105	225
1606		5∶5			9763.5	270	105	225
1607		4∶6			9892.5	270	105	225
1608		无肥区NoN			4684.65	0	105	225
1609	武际,郭熙盛,王允青,张平治	氮肥基追比例对烟农19小麦氮素吸收利用及产量和品质的影响
1610		N0			3937.5	0	90	150
1611		N10/0			6462.5	210	90	150
1612		N7/3			6400	210	90	150
1613		N5/3/2			6362.5	210	90	150
1614		N3/3/4			5887.5	210	90	150
1615	刘 枫,王允青,刘 英	淮北砂姜黑土地区小麦施钾效应研究
1616		K0			3468.8	180	60	0
1617		K1			3900	180	60	40
1618		K2			3943.8	180	60	80
1619		K3			3937.5	180	60	120
1620		K4			3881.3	180	60	160
1621	何传龙1,刘枫1,王道中1,汪建来2,李星3,李治林3	砂姜黑土强筋小麦施肥技术研究
1622		无肥对照	1		4423.5	0	0	0
1623	基施Basal	尿素	3		6724.5	172.5	67.5	112.5
1624	基施Basal	硫酸铵	5		6858	172.5	67.5	112.5
1625	基施Basal+追施Top dressing	尿素	8		7023	172.5	67.5	112.5
1626	基施Basal+追施Top dressing	尿素	9		7033	210	67.5	112.5
1627
1628			1		4423.5	0	0	0
1629			3		6724.5	172.5	67.5	112.5
1630			4		6667.5	172.5	90	112.5
1631			6		7189.5	172.5	67.5	112.5
1632
1633			1		4423.5	0	0	0
1634			2		6276	172.5	67.5	37.5
1635			3		6724.5	172.5	67.5	112.5
1636			10		7123.5	172.5	67.5	37.5
1637			11		7341	172.5	67.5	112.5
1638	Xiao Qin Dai, Hong Yan Zhang	Nutr Cycl Agroecosyst,2009. DOI 10.1007/s10705-009-9293-4
1639			OPT		6600	180	74.7
1640			OPT-N		5000	0	74.7
1641			OPT-P		6100	180	0
1642			OPT-K		6400	180	74.7
1643			CK		4400	0	0
785	陈莉	氮磷钾不同施肥水平配施对小麦产量和品质的影响
786		N0P0K0			5803.5	0	0	0
787		N0P2K2			6654	0	105	60
788		N1P2K2			7678.5	105	105	60
789		N2P0K2			7726.5	210	0	60
790		N2P1K2			8004	210	52.5	60
791		N2P2K2			8304	210	105	60
792		N2P3K2			8130	210	157.5	60
793		N2P2K0			7228.5	210	105	0
794		N2P2K1			7554	210	105	30
795		N2P2K3			8053.5	210	105	90
796		N3P2K2			7806	315	105	60
797		N1P1K2			7203	105	52.5	60
798		N1P2K1			7804.5	105	105	30
799		N2P1K1			7771	210	52.5	30
419	王小燕,沈永龙,高春宝,刘章勇,方正武	氮肥后移对江汉平原小麦籽粒产量及氮肥偏生产力的影响
420		T1			4807.1	180	105	135
421		T2			5190	180	105	135
422		T3			5591.3	180	105	135
423		T4			5287.5	180	105	135
424		T5	最佳		6126.8	180	105	135
425	朱新开,郭凯泉,李春燕,封超年,彭永欣,郭文善	氮肥运筹比例对稻田套播强筋小麦产量及花后旗叶衰老的影响
426		CK			2326.16	0	144	144
427		Ⅰ			6310.65	240	144	144
428		Ⅱ			6120.56	240	144	144
429		Ⅲ			6488.24	240	144	144
430		Ⅳ			6646.66	240	144	144
431		Ⅴ			6525.76	240	144	144
1430	曹承富 孔令聪	氮素水平对皖麦44产量和品质的调节效应
1431		0			4089	0	90	112.5
1432		75			5230.1	75	90	112.5
1433		150			5918.6	150	90	112.5
1434		225			6229.5	225	90	112.5
1435		300			5740.7	300	90	112.5
149	余宗波1，邹娟2，肖兴军		湖北省小麦施磷效果及磷肥利用率研究
150	共45个试验 均值	P0			5379	210	0	120
151		P37.5			6142	210	37.5	120
152		P75			6663	210	75	120
153		P112.5			6422	210	112.5	120
154	共25个试验 均值	P0			5356	210	0	120
155		P67.5			6470	210	67.5	120
156		P135			6880	210	135	120
157		P202.5			6678	210	202.5	120
210	柴彦君	不同冬小麦品种氮效率及其生理差异的研究
211	品种试验	EM14			2300.4	0	105	75
212		EM18			2375.85	0	105	75
213		EM23			1484.85	0	105	75
214		ZM9023			2152.88	0	105	75
215		LM1			1363.58	0	105	75
216		EM14			6670.2	195	105	75
217		EM18			6695.48	195	105	75
218		EM23			5957.02	195	105	75
219		ZM9023			5629.65	195	105	75
220		LM1			6953.03	195	105	75
646	杜世州,曹承富,张耀兰,赵竹,乔玉强,刘永华,张四华	氮肥基追比对淮北地区超高产小麦产量和品质的影响
647	2006-2007	10∶0			8730	270	105	225
648	烟农19	9∶1			9049.5	270	105	225
649		8∶2			9136.5	270	105	225
650		7∶3			9297	270	105	225
651		6∶4			9465	270	105	225
652		5∶5			9931.5	270	105	225
653		4∶6			9873	270	105	225
654	2006-2007	10∶0			8844	270	105	225
655	皖麦50	9∶1			9150	270	105	225
656		8∶2			9331.5	270	105	225
657		7∶3			9384	270	105	225
658		6∶4			9852	270	105	225
659		5∶5			9763.5	270	105	225
660		4∶6			9892.5	270	105	225
661	2007-2008	10∶0			8184	270	105	225
662	济麦20	9∶1			8194.5	270	105	225
663		8∶2			8275.5	270	105	225
664		7∶3			8671.5	270	105	225
665		6∶4			8977.5	270	105	225
666		5∶5			8818.5	270	105	225
667		4∶6			8595	270	105	225
668	烟农19	10∶0			8190	270	105	225
669		9∶1			8310	270	105	225
670		8∶2			8674.5	270	105	225
671		7∶3			8781	270	105	225
672		6∶4			8817	270	105	225
673		5∶5			9361.5	270	105	225
674		4∶6			8742	270	105	225
675	皖麦50	10∶0			8332.5	270	105	225
676		9∶1			8316	270	105	225
677		8∶2			8788.5	270	105	225
678		7∶3			8920.5	270	105	225
679		6∶4			9009	270	105	225
680		5∶5			9345	270	105	225
681		4∶6			8917.5	270	105	225
892	吴晓鹏1,陈静芬2,王广灿3,许浩玲1	小麦平衡施用氮磷钾肥经济效益的研究
893		N0P0K0			4800	0	0	0
894		N0P2K2			5475	0	90	72
895		N1P2K2			6375	90	90	72
896		N2P0K2			6240	180	0	72
897		N2P1K2			6645	180	45	72
898		N2P2K2			7237.5	180	90	72
899		N2P3K2			6877.5	180	135	72
900		N2P2K0			6630	180	90	0
901		N2P2K1			6825	180	90	36
902		N2P2K3			6900	180	90	108
903		N3P2K2			7035	270	90	72
904		N1P1K2			6975	90	45	72
905		N1P2K1			6547.5	90	90	36
906		N2P1K1			7020	180	45	36
1880	王小军 张洪程	不同土壤肥力配方施肥对淮南小麦产量、品质及肥料吸收利用率的影响
1881	高肥力 扬麦11	NO
1882		N1
1883		N1.5
1884		N2
1885		N2.5
1886		N3
1887	中肥力 扬麦11	NO
1888		N1
1889		N1.5
1890		N2
1891		N2.5
1892		N3
1893	低肥力 扬麦11	NO
1894		N1
1895		N1.5
1896		N2
1897		N2.5
1898		N3
1899	高肥力 扬麦15	NO
1900		N1
1901		N1.5
1902		N2
1903		N2.5
1904		N3
1905	中肥力 扬麦15	NO
1906		N1
1907		N1.5
1908		N2
1909		N2.5
1910		N3
1911	低肥力 扬麦15	NO
1912		N1
1913		N1.5
1914		N2
1915		N2.5
1916		N3
1917
1918	高肥力 扬麦11	P0
1919		P1
1920		P2
1921		P3
1922	中肥力 扬麦11	P0
1923		P1
1924		P2
1925		P3
1926	低肥力 扬麦11	P0
1927		P1
1928		P2
1929		P3
1930	高肥力 扬麦15	P0
1931		P1
1932		P2
1933		P3
1934	中肥力 扬麦15	P0
1935		P1
1936		P2
1937		P3
1938	低肥力 扬麦15	P0
1939		P1
1940		P2
1941		P3
1942
1943	高肥力 扬麦11	K0
1944		K1
1945		K2
1946		K3
1947	中肥力 扬麦11	K0
1948		K1
1949		K2
1950		K3
1951	低肥力 扬麦11	K0
1952		K1
1953		K2
1954		K3
1955	高肥力 扬麦15	K0
1956		K1
1957		K2
1958		K3
1959	中肥力 扬麦15	K0
1960		K1
1961		K2
1962		K3
1963	低肥力 扬麦15	K0
1964		K1
1965		K2
1966		K3
2565	朱新开,郭文善,	素对不同类型专用小麦营养和加工品质调控效应
2566	强筋小麦皖麦38	180	氮肥运筹9∶1		7196.1
2567		180	7∶1∶2		7379.1
2568		180	5∶1∶4		7868.7
2569		180	5∶1∶2∶2		7983.9
2570		180	3∶1∶3∶3		8373.9
2571		240	9∶1		7176.9
2572		240	7∶1∶2		7735.7
2573		240	5∶1∶4		8026.7
2574		240	5∶1∶2∶2		8073
2575		240	3∶1∶3∶3		8830.2
2576	中筋小麦扬麦10号	180	9∶1		7098
2577		180	7∶1∶2		7376
2578		180	5∶1∶4		8085.6
2579		180	5∶1∶2∶2		8230.5
2580		180	3∶1∶3∶3		8675.9
2581		240	9∶1		7566.5
2582		240	7∶1∶2		8111.1
2583		240	5∶1∶4		8362.2
2584		240	5∶1∶2∶2		8382.2
2585		240	3∶1∶3∶3		8542.7
2784	朱新开,张旭东,郭文善	不同品质类型小麦优质高产群体氮效率的差异	品种试验
2785			皖麦38 W		6294.6	180	108	108
2786			扬麦10号		7106.5	180	108	108
2787			淮麦18 H		6520.8	180	108	108
2788			宁麦9号		8096.3	180	108	108
2789			建麦1号		7861.95	180	108	108
				Min	405	0	0	0
				Max	9931.5	405	202.5	300
				Aver.	5756.19	185.755	94.2545	127.995
				0.025	1671.25	0	0	0
				0.975	9311.26	337.5	150	300
				Median	6094.12	195	90	120
				SD	1949.05	89.5591	35.848	56.8396
				0.25	4422.38	131.3	90	105
				0.75	7142.82	270	120	144

## Sheet: data for NW
No.	Data dource	Treatments			Grain yield	FN	FP（P2O5）	FK（K2O）
1675	Ningxia
1681	张爱平,刘汝亮,李友宏,杨世琦,杨淑静,杨正礼	施用磷肥对春小麦产量与吸氮特性及土体中硝态氮累积的影响
1682		P0			5584	240	0	90
1683		P60			6209	240	60	90
1684		P120			6215	240	120	90
1685		P180			6003	240	180	90
1700	Gansu province	春小麦
1712	沈新磊,黄思光,王 俊,凌 莉,李世清,李凤民	半干旱农田生态系统地膜覆盖模式和施氮对小麦产量和氮效率的效应
1713	1999底墒L	M0	0		1922	0	120	0
1714	春小麦		75		2554	75	120	0
1715		M30	0		2067.7	0	120	0
1716			75		2491.4	75	120	0
1717		M60	0		2272.1	0	120	0
1718			75		2436.2	75	120	0
1719		Mw	0		2276.4	0	120	0
1720			75		2750.1	75	120	0
1721	底墒H	M0	0		2194.1	0	120	0
1722			75		2424.3	75	120	0
1723		M30	0		2221.1	0	120	0
1724			75		3138.5	75	120	0
1725		M60	0		2858.1	0	120	0
1726			75		3305.3	75	120	0
1727		Mw	0		2625.9	0	120	0
1728			75		3123.1	75	120	0
1729	2000底墒L	M0	0		1100.24	0	120	0
1730			75		1833.91	75	120	0
1731		M30	0		1076.8	0	120	0
1732			75		1886.15	75	120	0
1733		M60	0		1109	0	120	0
1734			75		1202.85	75	120	0
1735		Mw	0		1286.88	0	120	0
1736			75		1201.51	75	120	0
1737	底墒H	M0	0		1482.46	0	120	0
1738			75		1375.73	75	120	0
1739		M30	0		1430.04	0	120	0
1740			75		1763.32	75	120	0
1741		M60	0		1461.45	0	120	0
1742			75		1771.39	75	120	0
1743		Mw	0		1448.03	0	120	0
1744			75		2144.52	75	120	0
1745	覆膜	M0	0		1863	0	120	0
1746			225		2120	225	120	0
1747		M75	0		2776	0	120	0
1748			225		3497	225	120	0
1749		M150	0		2905	0	120	0
1750			225		3088	225	120	0
1751		Mw	0		3079	0	120	0
1752			225		3111	225	120	0
1753	李文学 张福锁	小麦/玉米/蚕豆间作系统中氮、磷吸收利用特点及其环境效应
1754	不施磷P0	N0	单作		3958	0	0	0
1755		N100			3760	100	0	0
1756		N200			4802	200	0	0
1757		N300			3542	300	0	0
1758		N400			3477	400	0	0
1759		N0	间作		5806	0	0	0
1760		N100			4656	100	0	0
1761		N200			4806	200	0	0
1762		N300			4758	300	0	0
1763		N400			4411	400	0	0
1764	施磷P75	N0	单作		4792	0	75	0
1765		N100			4159	100	75	0
1766		N200			4256	200	75	0
1767		N300			4504	300	75	0
1768		N400			5218	400	75	0
1769		N0	间作		5569	0	75	0
1770		N100			6268	100	75	0
1771		N200			4738	200	75	0
1772		N300			5374	300	75	0
1773		N400			4736	400	75	0
1889	Xinjiang
1890	唐旭 马义兵	小麦-玉米轮作土壤磷素长期演变规律研究
1891		乌鲁木齐	CK		1081
1892	15年均值	1990-2004	N		2418
1893			NP		2453
1894	每年施入的氮相等，由秸秆和农家肥量确定		NK		4788
1895			NPK		4838
1896			NPKM		4645
1897			NPKSt		5303
	Gansu	2006春小麦甘肃钾肥产量效应与养分利用率研究	CK	养分限制因子（OPT试验）	3338	0	0	0
	Gansu	2006春小麦甘肃钾肥产量效应与养分利用率研究	CK	养分限制因子（OPT试验）	2813	0	0	0
	Gansu	2006春小麦甘肃钾肥产量效应与养分利用率研究	CK	养分限制因子（OPT试验）	2950	0	0	0
	Gansu	2006春小麦甘肃钾肥产量效应与养分利用率研究	OPT	养分限制因子（OPT试验）	3869	150	150	150
	Gansu	2006春小麦甘肃钾肥产量效应与养分利用率研究	OPT	养分限制因子（OPT试验）	4431	150	150	150
	Gansu	2006春小麦甘肃钾肥产量效应与养分利用率研究	OPT	养分限制因子（OPT试验）	3738	150	150	150
	Gansu	2006春小麦甘肃钾肥产量效应与养分利用率研究	OPT-N	养分限制因子（OPT试验）	3356	0	150	150
	Gansu	2006春小麦甘肃钾肥产量效应与养分利用率研究	OPT-N	养分限制因子（OPT试验）	5031	0	150	150
	Gansu	2006春小麦甘肃钾肥产量效应与养分利用率研究	OPT-N	养分限制因子（OPT试验）	2775	0	150	150
	Gansu	2006春小麦甘肃钾肥产量效应与养分利用率研究	OPT-P	养分限制因子（OPT试验）	4106	150	0	150
	Gansu	2006春小麦甘肃钾肥产量效应与养分利用率研究	OPT-P	养分限制因子（OPT试验）	3519	150	0	150
	Gansu	2006春小麦甘肃钾肥产量效应与养分利用率研究	OPT-P	养分限制因子（OPT试验）	4313	150	0	150
	Gansu	2006春小麦甘肃钾肥产量效应与养分利用率研究	OPT-K	养分限制因子（OPT试验）	4250	150	150	0
	Gansu	2006春小麦甘肃钾肥产量效应与养分利用率研究	OPT-K	养分限制因子（OPT试验）	3506	150	150	0
	Gansu	2006春小麦甘肃钾肥产量效应与养分利用率研究	OPT-K	养分限制因子（OPT试验）	4869	150	150	0
	Gansu	2006春小麦甘肃钾肥产量效应与养分利用率研究	FP	养分限制因子（OPT试验）	4331	225	150	0
	Gansu	2006春小麦甘肃钾肥产量效应与养分利用率研究	FP	养分限制因子（OPT试验）	4694	225	150	0
	Gansu	2006春小麦甘肃钾肥产量效应与养分利用率研究	FP	养分限制因子（OPT试验）	4725	225	150	0
	Gansu	2006春小麦甘肃钾肥产量效应与养分利用率研究	FP-N	养分限制因子（OPT试验）	2356	0	150	0
	Gansu	2006春小麦甘肃钾肥产量效应与养分利用率研究	FP-N	养分限制因子（OPT试验）	2544	0	150	0
	Gansu	2006春小麦甘肃钾肥产量效应与养分利用率研究	FP-N	养分限制因子（OPT试验）	2806	0	150	0
	Gansu	2006春小麦甘肃钾肥产量效应与养分利用率研究	FP-P	养分限制因子（OPT试验）	4163	225	0	0
	Gansu	2006春小麦甘肃钾肥产量效应与养分利用率研究	FP-P	养分限制因子（OPT试验）	3694	225	0	0
	Gansu	2006春小麦甘肃钾肥产量效应与养分利用率研究	FP-P	养分限制因子（OPT试验）	4438	225	0	0
	Gansu	2006春小麦甘肃钾肥产量效应与养分利用率研究	FP+K	养分限制因子（OPT试验）	4438	225	150	150
	Gansu	2006春小麦甘肃钾肥产量效应与养分利用率研究	FP+K	养分限制因子（OPT试验）	3788	225	150	150
	Gansu	2006春小麦甘肃钾肥产量效应与养分利用率研究	FP+K	养分限制因子（OPT试验）	4756	225	150	150
	Gansu	2006春小麦（带田）甘肃钾肥产量效应与养分利用率研究	OPT-1/2K	养分限制因子（OPT试验）	2875	300	120	75
	Gansu	2006春小麦（带田）甘肃钾肥产量效应与养分利用率研究	OPT-1/2K	养分限制因子（OPT试验）	3225	300	120	75
	Gansu	2006春小麦（带田）甘肃钾肥产量效应与养分利用率研究	OPT-1/2K	养分限制因子（OPT试验）	3013	300	120	75
	Gansu	2006春小麦（带田）甘肃钾肥产量效应与养分利用率研究	OPT	养分限制因子（OPT试验）	2875	300	120	150
	Gansu	2006春小麦（带田）甘肃钾肥产量效应与养分利用率研究	OPT	养分限制因子（OPT试验）	3200	300	120	150
	Gansu	2006春小麦（带田）甘肃钾肥产量效应与养分利用率研究	OPT	养分限制因子（OPT试验）	3050	300	120	150
	Gansu	2006春小麦（带田）甘肃钾肥产量效应与养分利用率研究	OPT+1/2K	养分限制因子（OPT试验）	3075	300	120	225
	Gansu	2006春小麦（带田）甘肃钾肥产量效应与养分利用率研究	OPT+1/2K	养分限制因子（OPT试验）	3225	300	120	225
	Gansu	2006春小麦（带田）甘肃钾肥产量效应与养分利用率研究	OPT+1/2K	养分限制因子（OPT试验）	3188	300	120	225
	Gansu	2006春小麦（带田）甘肃钾肥产量效应与养分利用率研究	OPT+K	养分限制因子（OPT试验）	3075	300	120	300
	Gansu	2006春小麦（带田）甘肃钾肥产量效应与养分利用率研究	OPT+K	养分限制因子（OPT试验）	3275	300	120	300
	Gansu	2006春小麦（带田）甘肃钾肥产量效应与养分利用率研究	OPT+K	养分限制因子（OPT试验）	2900	300	120	300
	Gansu	2006春小麦（带田）甘肃钾肥产量效应与养分利用率研究	OPT-K	养分限制因子（OPT试验）	2750	300	120	0
	Gansu	2006春小麦（带田）甘肃钾肥产量效应与养分利用率研究	OPT-K	养分限制因子（OPT试验）	3538	300	120	0
	Gansu	2006春小麦（带田）甘肃钾肥产量效应与养分利用率研究	OPT-K	养分限制因子（OPT试验）	2938	300	120	0
	Gansu	2009年甘肃全膜覆土穴播小麦养分积累及其水分利用效率研究	OPT（全膜覆土穴播）	养分限制因子（OPT试验）	6798	150	120	84
	Gansu	2009年甘肃全膜覆土穴播小麦养分积累及其水分利用效率研究	OPT（全膜覆土穴播）	养分限制因子（OPT试验）		150	120	84
	Gansu	2009年甘肃全膜覆土穴播小麦养分积累及其水分利用效率研究	OPT（全膜覆土穴播）	养分限制因子（OPT试验）	7302	150	120	84
	Gansu	2009年甘肃全膜覆土穴播小麦养分积累及其水分利用效率研究	CK（全膜覆土穴播）	养分限制因子（OPT试验）	5088	0	0	0
	Gansu	2009年甘肃全膜覆土穴播小麦养分积累及其水分利用效率研究	CK（全膜覆土穴播）	养分限制因子（OPT试验）	5364	0	0	0
	Gansu	2009年甘肃全膜覆土穴播小麦养分积累及其水分利用效率研究	CK（全膜覆土穴播）	养分限制因子（OPT试验）	5226	0	0	0
	Gansu	2009年甘肃全膜覆土穴播小麦养分积累及其水分利用效率研究	OPT（露地穴播）	养分限制因子（OPT试验）	4593	150	120	84
	Gansu	2009年甘肃全膜覆土穴播小麦养分积累及其水分利用效率研究	OPT（露地穴播）	养分限制因子（OPT试验）	4383	150	120	84
	Gansu	2009年甘肃全膜覆土穴播小麦养分积累及其水分利用效率研究	OPT（露地穴播）	养分限制因子（OPT试验）	4488	150	120	84
	Gansu	2009年甘肃全膜覆土穴播小麦养分积累及其水分利用效率研究	CK（露地穴播）	养分限制因子（OPT试验）	3120	0	0	0
	Gansu	2009年甘肃全膜覆土穴播小麦养分积累及其水分利用效率研究	CK（露地穴播）	养分限制因子（OPT试验）		0	0	0
	Gansu	2009年甘肃全膜覆土穴播小麦养分积累及其水分利用效率研究	CK（露地穴播）	养分限制因子（OPT试验）	3620	0	0	0
	Gansu	2010年甘肃半干旱区全膜覆土穴播小麦高产施肥技术研究	OPT	养分限制因子（OPT试验）	3675	180	120	90
	Gansu	2010年甘肃半干旱区全膜覆土穴播小麦高产施肥技术研究	OPT-N	养分限制因子（OPT试验）	3900	0	120	90
	Gansu	2010年甘肃半干旱区全膜覆土穴播小麦高产施肥技术研究	OPT-P	养分限制因子（OPT试验）	3900	180	0	90
	Gansu	2010年甘肃半干旱区全膜覆土穴播小麦高产施肥技术研究	OPT-K	养分限制因子（OPT试验）	3900	180	120	0
	Gansu	2010年甘肃半干旱区全膜覆土穴播小麦高产施肥技术研究	OPT+1/3P	养分限制因子（OPT试验）	4275	180	160	90
	Gansu	2010年甘肃半干旱区全膜覆土穴播小麦高产施肥技术研究	OPT+1/2P	养分限制因子（OPT试验）	3540	180	180	90
	Gansu	2010年甘肃半干旱区全膜覆土穴播小麦高产施肥技术研究	OPT-1/3P	养分限制因子（OPT试验）	2925	180	80	90
	Gansu	2010年甘肃半干旱区全膜覆土穴播小麦高产施肥技术研究	FP	养分限制因子（OPT试验）	3150	150	105	0
	Gansu	2010年甘肃半干旱区全膜覆土穴播小麦高产施肥技术研究	CK	养分限制因子（OPT试验）	3525	0	0	0
	Gansu	2010年甘肃陇东平衡施肥对全膜覆土穴播冬小麦产量及养分吸收特性的影响	OPT	养分限制因子（OPT试验）	4492	150	180	90
	Gansu	2010年甘肃陇东平衡施肥对全膜覆土穴播冬小麦产量及养分吸收特性的影响	OPT-N	养分限制因子（OPT试验）	3471	0	180	90
	Gansu	2010年甘肃陇东平衡施肥对全膜覆土穴播冬小麦产量及养分吸收特性的影响	OPT-P	养分限制因子（OPT试验）	3704	150	0	90
	Gansu	2010年甘肃陇东平衡施肥对全膜覆土穴播冬小麦产量及养分吸收特性的影响	OPT-K	养分限制因子（OPT试验）	3734	150	180	0
	Gansu	2010年甘肃陇东平衡施肥对全膜覆土穴播冬小麦产量及养分吸收特性的影响	FP	养分限制因子（OPT试验）	3750	180	105	0
	Gansu	2010年甘肃陇东平衡施肥对全膜覆土穴播冬小麦产量及养分吸收特性的影响	CK	养分限制因子（OPT试验）	3559	0	0	0
	Ningxia province	2005年宁夏银川市大新乡小麦套种玉米-小麦灌淤土钾肥定位试验（试验01）	NP+K-ST	钾肥定位试验	5178.8	197.8	103.5	150
	Ningxia province	2005年宁夏银川市大新乡小麦套种玉米-小麦灌淤土钾肥定位试验（试验01）	NP+K+ST	钾肥定位试验	5238.4	197.8	103.5	150
	Ningxia province	2005年宁夏银川市大新乡小麦套种玉米-小麦灌淤土钾肥定位试验（试验01）	NP-K+ST	钾肥定位试验	5149.1	197.8	103.5	0
	Ningxia province	2005年宁夏银川市大新乡小麦套种玉米-小麦灌淤土钾肥定位试验（试验01）	NP-K-ST	钾肥定位试验	5030	197.8	103.5	0
	Ningxia province	2006年宁夏吴忠市东塔乡刘碱滩村小麦套种玉米氮肥用量试验（试验12）	N0	氮肥用量	2748	0	90	90
	Ningxia province	2006年宁夏吴忠市东塔乡刘碱滩村小麦套种玉米氮肥用量试验（试验12）	N-60	氮肥用量	4476	60	90	90
	Ningxia province	2006年宁夏吴忠市东塔乡刘碱滩村小麦套种玉米氮肥用量试验（试验12）	N-120	氮肥用量	4818	120	90	90
	Ningxia province	2006年宁夏吴忠市东塔乡刘碱滩村小麦套种玉米氮肥用量试验（试验12）	N-180	氮肥用量	4807.5	180	90	90
	Ningxia province	2006年宁夏吴忠市东塔乡刘碱滩村小麦套种玉米氮肥用量试验（试验12）	N-240	氮肥用量	4843.5	240	90	90
	Ningxia province	2007宁夏吴忠市利通区东塔寺乡干饭渠村小麦套种玉米氮钾交互试验--小麦（试验10）	N0K0	两种以上肥料的交互作用	3279	0	0	180
	Ningxia province	2007宁夏吴忠市利通区东塔寺乡干饭渠村小麦套种玉米氮钾交互试验--小麦（试验10）	N0K1	两种以上肥料的交互作用	2817	0	180	135
	Ningxia province	2007宁夏吴忠市利通区东塔寺乡干饭渠村小麦套种玉米氮钾交互试验--小麦（试验10）	N0K2	两种以上肥料的交互作用	3928.5	0	180	270
	Ningxia province	2007宁夏吴忠市利通区东塔寺乡干饭渠村小麦套种玉米氮钾交互试验--小麦（试验10）	N1K0	两种以上肥料的交互作用	4405.5	225	180	0
	Ningxia province	2007宁夏吴忠市利通区东塔寺乡干饭渠村小麦套种玉米氮钾交互试验--小麦（试验10）	N1K1	两种以上肥料的交互作用	4333.5	225	180	135
	Ningxia province	2007宁夏吴忠市利通区东塔寺乡干饭渠村小麦套种玉米氮钾交互试验--小麦（试验10）	N1K2	两种以上肥料的交互作用	4318.5	225	180	270
	Ningxia province	2007宁夏吴忠市利通区东塔寺乡干饭渠村小麦套种玉米氮钾交互试验--小麦（试验10）	N2K0	两种以上肥料的交互作用	3999	450	180	0
	Ningxia province	2007宁夏吴忠市利通区东塔寺乡干饭渠村小麦套种玉米氮钾交互试验--小麦（试验10）	N2K1	两种以上肥料的交互作用	3820.5	450	180	135
	Ningxia province	2007宁夏吴忠市利通区东塔寺乡干饭渠村小麦套种玉米氮钾交互试验--小麦（试验10）	N2K2	两种以上肥料的交互作用	3879	450	180	270
	Ningxia province	2008宁夏吴忠利通区国家农业科技园区春小麦氮肥用量试验（试验01）	N0	氮肥用量	4209	0	120	90
	Ningxia province	2008宁夏吴忠利通区国家农业科技园区春小麦氮肥用量试验（试验01）	N0	氮肥用量	3959	0	120	90
	Ningxia province	2008宁夏吴忠利通区国家农业科技园区春小麦氮肥用量试验（试验01）	N120	氮肥用量	4334	120	120	90
	Ningxia province	2008宁夏吴忠利通区国家农业科技园区春小麦氮肥用量试验（试验01）	N120	氮肥用量	4672	120	120	90
	Ningxia province	2008宁夏吴忠利通区国家农业科技园区春小麦氮肥用量试验（试验01）	N240	氮肥用量	5267	240	120	90
	Ningxia province	2008宁夏吴忠利通区国家农业科技园区春小麦氮肥用量试验（试验01）	N240	氮肥用量	5149	240	120	90
	Ningxia province	2008宁夏吴忠利通区国家农业科技园区春小麦氮肥用量试验（试验01）	N360	氮肥用量	4986	360	120	90
	Ningxia province	2008宁夏吴忠利通区国家农业科技园区春小麦氮肥用量试验（试验01）	N360	氮肥用量	5124	360	120	90
	Ningxia province	2008宁夏吴忠利通区国家农业科技园区春小麦磷肥用量试验（试验02）	P0	磷肥用量	5400	240	0	90
	Ningxia province	2008宁夏吴忠利通区国家农业科技园区春小麦磷肥用量试验（试验02）	P0	磷肥用量	5667	240	0	90
	Ningxia province	2008宁夏吴忠利通区国家农业科技园区春小麦磷肥用量试验（试验02）	P60	磷肥用量	6084	240	60	90
	Ningxia province	2008宁夏吴忠利通区国家农业科技园区春小麦磷肥用量试验（试验02）	P60	磷肥用量	6251	240	60	90
	Ningxia province	2008宁夏吴忠利通区国家农业科技园区春小麦磷肥用量试验（试验02）	P120	磷肥用量	6400	240	120	90
	Ningxia province	2008宁夏吴忠利通区国家农业科技园区春小麦磷肥用量试验（试验02）	P120	磷肥用量	6251	240	120	90
	Ningxia province	2008宁夏吴忠利通区国家农业科技园区春小麦磷肥用量试验（试验02）	P240	磷肥用量	5750	240	240	90
	Ningxia province	2008宁夏吴忠利通区国家农业科技园区春小麦磷肥用量试验（试验02）	P240	磷肥用量	6417	240	240	90
Ningxia province
1676	张爱平，杨世琦，杨淑静，李友宏，刘汝亮，杨正礼	不同供氮水平对春小麦产量、氮肥利用率及氮平衡的影响
1677		N0			4112	0	120	90
1678		N120			4668	120	120	90
1679		N240			5278	240	120	90
1680		N360			5178	360	120	90
1686	谭德水 金继运 黄绍文	长期施钾与秸秆还田对西北地区不同种植制度下作物产量及土壤钾素的影响			13年定位试验
1687	宁夏灌淤土	NP			4808	138	103.5	150
1688		NP+St			4980	138	103.5	150
1689		NPK			5076	138	103.5	150
1690		NPK+St			5193	138	103.5	150
1691	何文寿1,何进勤1,郭瑞英2	宁夏引黄灌区春小麦不同生育期吸收氮、磷、钾养分的特点
1692	红星5队	NPK(-)			4490	0	0	0
1693	王太堡 试验农场	NPK(+)			6870	225	120	60
1694	青海省
1695	谭德水 金继运 黄绍文	长期施钾与秸秆还田对西北地区不同种植制度下作物产量及土壤钾素的影响			13年定位试验
1696	青海栗钙土	NP			5355	110	55.2	150
1697		NP+St			5220	110	55.2	150
1698		NPK			5269	110	55.2	150
1699		NPK+St			5184	110	55.2	150
Gansu province
1701	尚成柏 刘淑英	施肥对土壤速效养分、春小麦养分吸收及产量和品质的影响
1702		CK			1968.1	0
1703		N			4225.7	180
1704		P			3096.4	0	120
1705		NP			5867.3	180	120
1706		NPK			6184.5	180	120	75
1707		S			2613.6	180	66	189
1708		SNP			4693.5	180	72	216
1709		M			3645.3	180	120	47
1710		NT			5037.2	180	120	47
1711		MNP			5388.8	180	120	54
1774	杨生茂，郭天文	河西绿洲灌区小麦/玉米带田施氮量及其环境效应
1775		0			4940	0	150	0
1776		150			5490	150	150	0
1777		300			5660	300	150	0
1778		450			5700	450	150	0
1779		600			5530		150	0
1780		750			5170		150	0
1781	叶优良 张福锁	间作对氮素和水分利用的影响
1782	No单作	171			5027	0	90	0
1783		花培764			6194	0	90	0
1784		陇17			6305	0	90	0
1785		宁麦3号			5728	0	90	0
1786		石1269			6296	0	90	0
1787		永良4号			5848	0	90	0
1788	No间作	171			6844	0	90	0
1789		花培764			8480	0	90	0
1790		陇17			7994	0	90	0
1791		宁麦3号			6674	0	90	0
1792		石1269			8519	0	90	0
1793		永良4号			7245	0	90	0
1794	N300单作	171			7557	300	90	0
1795		花培764			7035	300	90	0
1796		陇17			6752	300	90	0
1797		宁麦3号			6650	300	90	0
1798		石1269			7643	300	90	0
1799		永良4号			7372	300	90	0
1800	N300间作	171			9167	300	90	0
1801		花培764			9776	300	90	0
1802		陇17			9583	300	90	0
1803		宁麦3号			9174	300	90	0
1804		石1269			10509	300	90	0
1805		永良4号			9113	300	90	0
1864	内蒙古
1865	董文娟，张永平，谢岷，韩开明，付小军	河套灌区春小麦高产栽培水氮高效利用研究*
1866	2 水	CK			5179.5	0
1867		N0			5922	78.6
1868		N5			6550.5	113.4
1869		N10			6802.5	148.2
1870		N15			6709.5	183
1871		N20			6178.5	217.8
1872	4 水	CK			5416.5	0
1873		N0			5901	78.6
1874		N5			6876	113.4
1875		N10			7444.5	148.2
1876		N15			7338	183
1877		N20			7146	217.8
1103	叶优良,包兴国,宋建兰	长期施用不同肥料对小麦/玉米间作产量、氮吸收利用和土壤硝态氮累积的影响
1104	农肥120,000kg/hm2	M			6875
1105	绿肥45,000kg/hm2	G			7188
1106	秸杆10,500kg/hm2	S			3434
1107	N 375kg/hm2	N			5704
1108	农肥60,000+N187·5kg/hm	1/2(M+N)			6845
1109	绿肥22, 500 + N187·5kg/hm2	1/2(G+N)			6511
1110	秸杆5,250+N187·5 kg/hm2	1/2(S+N)			5778
1111		CK			2564
1436	李凤民刘小兰王俊	底墒与磷肥互作对春小麦产量形成的影响
1437		CK			917.7	0	0
1438		P	耕作层施磷		1191.1	90	52.4
1439		W	浇灌30 mm底墒		2516.5	90	52.4
1440		WP	施磷加浇灌30 mm底墒		2734.1	90	52.4
755	甘肃	397	2000		4787.9	188.5	118.3	26
				Min	917.7	0	0	0
				Max	10509	450	240	300
				Aver.	4426.13	145.291	99.0728	53.133
				0.025	1201.85	0	0	0
				0.975	8509.25	400	180	250.875
				Median	4411	150	120	0
				SD	1808.07	120.699	51.9488	72.5231
				0.25	3092.2	0	75	0
				0.75	5408.25	228.75	120	90
